# Supplementary material for: GeneSurrounder: network-based identification of disease genes in expression data
Source: BMC Bioinformatics. 2019 May 6;20:229. doi: 10.1186/s12859-019-2829-y (PMC6503437; doi:10.1186/s12859-019-2829-y)
Supplement: Supplementary file 1 — Table of the full results of GeneSurrounder applied to GSE14764. (CSV 258 kb) [file 12859_2019_2829_MOESM1_ESM.csv]

	X1	gene.id	radius	size	observed.tau_b	p.Decay	observed.cor	p.Sphere	p.Fisher
1	1	hsa:2	4	735	-0.0308777005002739	0.162	136.163339313662	0.001	0.00157592210408257
2	2	hsa:9	2	49	-0.174445755078065	0.083	6.52414398595259	0.82	0.250962103410432
3	3	hsa:10	2	49	-0.174445755078065	0.083	12.7088597931061	0.032	0.0184085608298093
4	4	hsa:15	3	190	-0.0325726227302084	0.294	38.3755010115662	0.286	0.292270853177986
5	5	hsa:18	2	94	-0.0614666428598677	0.235	9.50204221857464	0.983	0.569500304948069
6	6	hsa:25	4	1952	-0.0147257098051375	0.242	307.703324808184	0.002	0.00417857801520386
7	7	hsa:27	5	2145	-0.0370533384025298	0.057	348.692025804481	0.199	0.0621500491010915
8	8	hsa:28	2	13	-0.372104203767625	0.07	3.19853418330343	0.152	0.0589789542195303
9	9	hsa:30	4	1355	-0.0102239290092708	0.357	175.020231324197	0.217	0.275625206054822
10	10	hsa:31	2	66	-0.125854332788718	0.122	8.82944611978471	0.853	0.33953925661463
11	11	hsa:32	3	464	-0.00346865657441893	0.457	66.7750124060007	0.092	0.175283058478844
12	12	hsa:33	1	10	NA	1	1.6269038439516	0.186	0.498853600580022
13	13	hsa:34	3	380	0.00961836301014238	0.559	56.1110814215368	0.339	0.504709568583721
14	14	hsa:36	4	508	-0.00568308684760202	0.426	48.191128755201	0.036	0.0794029416623901
15	15	hsa:37	3	142	0.0939150025249456	0.916	19.8083750047715	0.001	0.00732387268105378
16	16	hsa:38	3	208	-0.0317197794992097	0.279	27.1209298774669	0.097	0.124749274567519
17	17	hsa:43	6	634	-0.0354581305896075	0.153	137.661831507424	0.021	0.0216573877889
18	18	hsa:48	4	288	0.0214974189693084	0.649	47.772187655075	0.07	0.185880597482148
19	19	hsa:51	12	2656	-0.00387488548688339	0.437	437.570294308509	0.542	0.577997507199913
20	20	hsa:52	14	2686	0.00135442692015126	0.531	567.633622170477	0.484	0.606185987565986
21	21	hsa:53	6	2295	0.0259300233305822	0.91	317.088254380273	0.295	0.621486072137385
22	22	hsa:54	6	2295	0.0261637155684612	0.912	390.736229339237	0.378	0.711871694670993
23	23	hsa:55	1	2	NA	1	0.325304424170706	0.195	0.513777365481586
24	24	hsa:59	2	15	0.029424494316825	0.562	5.05951063098828	0.000999000999000999	0.00476381080232054
25	25	hsa:70	3	389	-0.0128563243287626	0.385	68.1920448906363	0.124	0.192964395316331
26	26	hsa:72	2	15	0.05884898863365	0.617	4.19460243539336	0.000999000999000999	0.00517247004817167
27	27	hsa:81	2	195	-0.0202028750060757	0.364	29.0973775623163	0.000999000999000999	0.00324340225114932
28	28	hsa:87	2	195	-0.0195648894795681	0.374	34.0523724090545	0.000999000999000999	0.00332238071285732
29	29	hsa:88	5	2258	-0.0219099440923737	0.129	330.534717715769	0.116	0.0778443435507937
30	30	hsa:89	5	2258	-0.0222025330690605	0.127	373.782456006413	0.376	0.193000897636185
31	31	hsa:90	1	10	NA	1	1.92911402068939	0.047	0.190707560831788
32	32	hsa:91	16	2694	-0.00352985858210541	0.452	461.033133564912	0.475	0.545018864358712
33	33	hsa:92	2	16	-0.0790569415042095	0.384	2.28449822498759	0.056	0.104068958830049
34	34	hsa:93	7	2374	-0.0162320591497603	0.173	295.322097950147	0.526	0.309112721480818
35	35	hsa:98	15	2689	-0.00516828616890512	0.399	379.569187311524	0.52	0.53378801396444
36	36	hsa:100	3	166	-0.0396994676222107	0.257	22.368629995801	0.678	0.478703802859928
37	37	hsa:102	4	1117	-0.0317007337828046	0.114	149.438294461198	0.152	0.0876005185694008
38	38	hsa:107	2	448	-0.0428969464170272	0.161	91.9794251250143	0.193	0.13894030949462
39	39	hsa:108	2	448	-0.0420032600333392	0.163	80.5711722716341	0.068	0.0609869683945619
40	40	hsa:109	2	457	-0.0284055943160916	0.249	90.1628049013246	0.307	0.272993999449203
41	41	hsa:112	2	445	-0.0353177114429411	0.206	72.090926441959	0.202	0.173911806778078
42	42	hsa:113	4	2172	-0.00110585766787067	0.458	418.985609039203	0.229	0.341382453395369
43	43	hsa:114	2	448	-0.0422752515414181	0.166	79.0956979806848	0.005	0.00671809043145412
44	44	hsa:115	2	448	-0.0337276878764957	0.22	60.1957476046876	0.582	0.391215024679256
45	45	hsa:116	3	166	-0.0572765867711973	0.182	30.2918654807802	0.002	0.00324628183527923
46	46	hsa:117	2	166	-0.0465140179005615	0.244	43.1678054739092	0.001	0.00227367552917174
47	47	hsa:124	6	2439	0.00598365099984373	0.63	380.57796694278	0.353	0.55671393117112
48	48	hsa:125	3	351	-0.0068213598128307	0.498	64.6278581516968	0.26	0.394166751488172
49	49	hsa:128	6	2439	0.00548080983384293	0.618	329.259800740543	0.224	0.412164121166931
50	50	hsa:130	17	2700	0.000486545651476513	0.534	452.196091155476	0.467	0.595710540776845
51	51	hsa:132	3	319	-0.00206525929352117	0.484	39.7631026453411	0.101	0.196430828190322
52	52	hsa:136	3	519	0.0310772919092764	0.776	67.3645837309616	0.099	0.273972682527752
53	53	hsa:146	2	78	-0.178833307807444	0.025	15.5543382830095	0.147	0.0242777928877162
54	54	hsa:148	2	78	-0.176400201578771	0.026	11.1576898118105	0.062	0.0119776107714551
55	55	hsa:154	2	141	-0.14192845416312	0.031	32.1606672519754	0.188	0.0358135343447034
56	56	hsa:155	2	79	-0.132567728975834	0.09	13.732946520594	0.000999000999000999	0.000927575459457581
57	57	hsa:156	3	452	-0.0847972589242967	0.022	114.010917280605	0.000999000999000999	0.000257702584723935
58	58	hsa:158	2	123	0.0386627289272381	0.693	18.1437569187311	0.011	0.0447972096349951
59	59	hsa:163	5	1377	-0.00277067939160586	0.44	194.464595182654	0.143	0.236949874353836
60	60	hsa:174	2	46	-0.0509701901028405	0.424	6.31568500209948	0.159	0.249228383460923
61	61	hsa:178	3	215	0.0313664746526052	0.698	35.5041798679238	0.261	0.492385423960539
62	62	hsa:182	2	18	-0.228664780190012	0.18	2.19987021414666	0.172	0.138547833768869
63	63	hsa:185	2	78	-0.181266414036117	0.025	10.4460816123984	0.996	0.116852898140236
64	64	hsa:186	4	1213	-0.0199394926474356	0.198	226.085467801657	0.001	0.00188639421839941
65	65	hsa:189	3	137	-0.0559116149104686	0.228	25.6301484902851	0.453	0.337766856239462
66	66	hsa:191	2	24	-0.243266816399921	0.072	6.05172347978776	0.229	0.0841732587147759
67	67	hsa:207	4	2238	-0.0254132086470105	0.051	243.388059701492	0.424	0.104529366587453
68	68	hsa:208	4	2238	-0.0252728724309505	0.054	265.597740199259	0.304	0.0838775324648579
69	69	hsa:210	2	11	-0.440385506050544	0.051	1.835897240142	0.165	0.0486196774830208
70	70	hsa:211	15	2685	-0.00579261534921444	0.355	454.199946558766	0.549	0.513605687856636
71	71	hsa:212	1	8	NA	1	2.04313471008131	0.023	0.109762004450219
72	72	hsa:216	2	100	-0.0662173722490953	0.196	15.9108294842921	0.025	0.0309607483619412
73	73	hsa:217	4	1213	-0.0010162241099462	0.515	206.367484826507	0.135	0.254883438802888
74	74	hsa:218	6	2419	0.00120101939758235	0.525	417.996869870596	0.096	0.200983310836803
75	75	hsa:219	6	2444	0.00552483928537154	0.614	295.909875176547	0.308	0.504062121628279
76	76	hsa:221	2	106	0.159547054623016	0.977	16.7953582471275	0.006	0.0359883681278969
77	77	hsa:223	2	134	0.0337189089309253	0.676	19.1695995724701	0.067	0.185453749273724
78	78	hsa:224	4	1213	-0.00282326923778287	0.481	164.327861968928	0.192	0.3123481243228
79	79	hsa:226	2	121	0.071562876012632	0.828	18.3619116692751	0.002	0.0122599479693196
80	80	hsa:229	15	2693	-0.0105756317269725	0.258	456.025842653739	0.479	0.381973471121322
81	81	hsa:230	15	2693	-0.010914569639463	0.253	335.240180173302	0.544	0.410579904257916
82	82	hsa:238	5	2305	-0.0313562951129169	0.064	239.735465893041	0.42	0.124088099878235
83	83	hsa:239	7	2558	-0.0198651541953645	0.134	375.47535977402	0.398	0.209659758520539
84	84	hsa:240	3	731	-0.0264933946285085	0.199	146.64301255869	0.078	0.0801788429834721
85	85	hsa:242	3	726	-0.024665565965348	0.21	151.18532656411	0.166	0.151864635227715
86	86	hsa:247	3	731	-0.0350168824420957	0.132	132.918845669351	0.101	0.0708940847963305
87	87	hsa:248	5	9	-0.522976360368491	0.049	1.98774668855212	0.482	0.112085032471576
88	88	hsa:249	5	9	-0.588348405414552	0.021	1.30621826926747	0.723	0.0787630104095803
89	89	hsa:250	5	9	-0.522976360368491	0.045	1.07661182578158	0.827	0.159691179132531
90	90	hsa:262	2	17	-0.101056510431805	0.342	3.04752452570905	0.178	0.231262826889629
91	91	hsa:267	7	2242	-0.027728921306059	0.05	392.766232774745	0.282	0.074188284790532
92	92	hsa:269	2	13	-0.150970271219279	0.279	2.58018093674848	0.202	0.218445359535725
93	93	hsa:270	2	123	-0.000932952377811441	0.497	24.4794060388594	0.086	0.177489285236619
94	94	hsa:273	4	1797	-0.0498955693968047	0.011	245.439974042829	0.504	0.0343452963107721
95	95	hsa:275	3	210	0.0595984985816586	0.86	28.6895064320342	0.014	0.0652510309027816
96	96	hsa:285	3	1185	-0.00478694458337705	0.411	151.531702103294	0.057	0.111368820553866
97	97	hsa:286	2	106	-0.127812850261309	0.065	18.7778753292362	0.753	0.196614906759854
98	98	hsa:287	2	106	-0.129849708432804	0.058	14.89743100355	0.37	0.10389997506659
99	99	hsa:288	2	106	-0.127812850261309	0.063	18.4833759590793	0.342	0.104230177526315
100	100	hsa:290	2	22	-0.249777084217821	0.095	3.2089933961904	0.508	0.194543406078576
101	101	hsa:291	2	19	NA	1	4.26174752834294	0.005	0.0314915868327402
102	102	hsa:292	2	19	NA	1	4.53574836813376	0.000999000999000999	0.00790085392538984
103	103	hsa:293	3	116	0.182823679360346	0.986	14.8834981104707	0.02	0.0971431244558068
104	104	hsa:314	6	2333	-0.0131999712976823	0.22	260.100278657862	0.557	0.379790399742234
105	105	hsa:316	2	148	-0.000838727552264208	0.471	29.4619994655877	0.157	0.266535059183461
106	106	hsa:317	5	2274	-0.0342357776323936	0.036	529.276443867618	0.277	0.0559227178580352
107	107	hsa:318	3	567	-0.0375098818598422	0.146	76.4842920945146	0.191	0.127707576351925
108	108	hsa:322	7	2350	-0.00244264547997302	0.458	511.412375462839	0.223	0.335149616370497
109	109	hsa:324	3	845	0.0533836392106697	0.959	120.913921441386	0.124	0.372128347794552
110	110	hsa:329	6	2513	-0.0277237737870981	0.09	298.042065885407	0.493	0.182591056332047
111	111	hsa:330	4	1774	-0.0393661400455069	0.078	332.179867923808	0.000999000999000999	0.000815049446618787
112	112	hsa:331	6	2490	-0.0319011928768744	0.067	290.698018857121	0.427	0.130286356570186
113	113	hsa:332	16	2694	-0.00964546585551784	0.313	438.99015154407	0.518	0.457109594781443
114	114	hsa:335	4	1292	-0.00453271376470304	0.452	196.991869298011	0.053	0.113348687545477
115	115	hsa:336	6	2450	-0.00952255184502669	0.298	418.302668244455	0.283	0.292889466638567
116	116	hsa:348	3	27	-0.27654325975404	0.023	4.79386952704508	0.239	0.0341009296871996
117	117	hsa:351	6	2350	-0.00317306248800288	0.44	357.756575180364	0.196	0.297581569857882
118	118	hsa:353	6	2457	-0.0068132759495856	0.309	405.876817956254	0.246	0.271889744358628
119	119	hsa:354	5	2049	-0.000556054415202066	0.508	246.945757147765	0.079	0.169179707042796
120	120	hsa:355	3	707	-0.0276811642201635	0.186	126.340535175783	0.007	0.00995229756322488
121	121	hsa:356	3	934	-0.0274773253218639	0.162	167.653815322365	0.638	0.337930290791293
122	122	hsa:359	2	159	0.022381033839574	0.647	32.9175859831278	0.055	0.154290548918847
123	123	hsa:367	6	2530	-0.0133022183033679	0.241	295.285490705043	0.457	0.353102551835736
124	124	hsa:369	4	2143	-0.0287755537595549	0.053	304.292514410047	0.214	0.0621455699025448
125	125	hsa:383	5	2276	-0.0278301485071326	0.057	228.779325877009	0.573	0.144413014481307
126	126	hsa:387	2	554	-0.0200492311256976	0.298	75.9662556781311	0.073	0.105027390289774
127	127	hsa:391	3	1179	0.0212007112895815	0.813	257.780814597091	0.023	0.0931076545622802
128	128	hsa:396	2	235	-0.00711351430410611	0.453	33.9554910867657	0.188	0.294937960861383
129	129	hsa:397	4	1943	-0.00409346639506661	0.421	399.959728213154	0.134	0.218606389463208
130	130	hsa:405	10	2636	-0.0116432110928496	0.244	354.691567736764	0.37	0.307388894444521
131	131	hsa:406	4	1636	-0.0102272248889873	0.305	277.119441157384	0.33	0.331753081672116
132	132	hsa:409	3	677	-0.0361205750697857	0.119	120.717486735122	0.000999000999000999	0.0011932557455116
133	133	hsa:410	3	86	-0.0845887554947218	0.184	14.6215597205787	0.777	0.421059982045833
134	134	hsa:411	3	18	-0.555734405336007	0.000999000999000999	2.15658281482613	0.828	0.00669802940703219
135	135	hsa:412	2	91	-0.0284221485700416	0.368	18.674352025041	0.007	0.0179328690046263
136	136	hsa:427	1	14	NA	1	3.11501316944688	0.021	0.102127889666433
137	137	hsa:432	2	10	-0.149071198499986	0.4	1.20494713135092	0.176	0.257210765913597
138	138	hsa:433	1	1	NA	1	0.597511165400618	0.004	0.026085843671449
139	139	hsa:434	3	57	0.0390923364718651	0.644	7.33858838798336	0.001	0.00537599081971779
140	140	hsa:435	6	2489	-0.0213142698996594	0.076	318.641332977058	0.368	0.128000985609308
141	141	hsa:438	2	90	-0.167964256692807	0.023	11.6765278467	0.711	0.083618512996728
142	142	hsa:440	3	313	0.0988510104278441	0.986	51.6980570294308	0.008	0.046084951075346
143	143	hsa:443	3	313	0.113036241826581	0.993	57.7422223918769	0.02	0.0976922857404511
144	144	hsa:445	7	2567	-0.0178223677438576	0.122	329.030308813986	0.541	0.245400071609848
145	145	hsa:462	3	49	0.0557657184542019	0.676	11.9656067488644	0.001	0.00561033861777881
146	146	hsa:466	12	2668	-0.00320224037778813	0.462	406.978890712677	0.437	0.524926917978954
147	147	hsa:467	3	855	0.0360485260389429	0.88	115.414971179906	0.000999000999000999	0.00706513244028581
148	148	hsa:471	1	20	NA	1	5.12699927472611	0.003	0.0204274289709421
149	149	hsa:472	5	2397	-0.0228781436254789	0.075	430.1755544528	0.292	0.105585783263297
150	150	hsa:477	4	2104	-0.0219768977566357	0.124	308.277932587701	0.165	0.100034740787664
151	151	hsa:478	4	2104	-0.0210478192791127	0.131	373.505859449555	0.104	0.0721516459005107
152	152	hsa:479	5	911	-0.00348170160783589	0.454	157.255716303393	0.047	0.103430956748746
153	153	hsa:481	4	2104	-0.021673712691041	0.125	352.258502882009	0.346	0.179087785472384
154	154	hsa:482	5	2408	-0.0261500022976498	0.089	356.220406916822	0.346	0.137970528113293
155	155	hsa:483	6	2534	-0.027527717311139	0.081	282.81066534336	0.548	0.18264712613227
156	156	hsa:486	4	2104	-0.0211144281192812	0.131	444.468450585945	0.122	0.0820882217810573
157	157	hsa:487	3	196	-0.0761336063840741	0.101	24.6666793907699	0.017	0.0126494423888637
158	158	hsa:488	2	45	-0.1359059177167	0.147	7.46887048135283	0.455	0.24779424723621
159	159	hsa:489	2	10	-0.347832796499967	0.21	2.21567355040653	0.447	0.315951816891282
160	160	hsa:490	2	149	0.106474598829489	0.934	25.0564950185136	0.009	0.0485766730134078
161	161	hsa:491	2	133	0.0172949729282752	0.604	22.696644653968	0.009	0.0337831732507205
162	162	hsa:492	2	133	0.0172949729282752	0.606	29.6301103179753	0.133	0.283566447797173
163	163	hsa:493	16	2694	-0.00309391244675251	0.476	297.687177921136	0.449	0.543515053352775
164	164	hsa:495	7	2323	-0.0169982759550017	0.149	484.375233805397	0.185	0.126556660288615
165	165	hsa:513	5	911	0.000412611775096398	0.513	154.36889720197	0.095	0.195980873415839
166	166	hsa:516	3	32	-0.0426856314947417	0.397	7.04008092529679	0.003	0.00920995772843328
167	167	hsa:518	3	32	-0.0558196719546622	0.362	6.4250104973852	0.000999000999000999	0.00322757386256016
168	168	hsa:521	7	2323	-0.0157991350918639	0.176	410.858533419857	0.342	0.229344510990377
169	169	hsa:522	2	28	0.0296956935458249	0.592	5.38126503034699	0.016	0.0536059807823611
170	170	hsa:523	3	32	-0.0492526517247019	0.379	4.46596938580753	0.107	0.170531266208484
171	171	hsa:525	3	32	-0.0558196719546622	0.363	4.67171813566439	0.041	0.0775037531830583
172	172	hsa:526	3	32	-0.0558196719546622	0.364	5.61713173264114	0.162	0.225892276619251
173	173	hsa:528	2	28	-0.00593913870916499	0.516	5.33774859716761	0.021	0.0598676143601716
174	174	hsa:529	5	911	-0.00371350597586758	0.454	149.083559186166	0.057	0.120445582219063
175	175	hsa:533	2	38	0.135832024514749	0.847	8.24663129365958	0.000999000999000999	0.00683253100000757
176	176	hsa:534	7	2323	-0.0172135762463378	0.142	329.325266251861	0.371	0.207750489103839
177	177	hsa:535	5	958	-0.0144959344244231	0.284	125.294423025537	0.049	0.073402948157872
178	178	hsa:537	2	141	0.0788771565308113	0.865	19.3225178455548	0.041	0.153890046629196
179	179	hsa:539	7	2323	-0.0168710943483052	0.148	407.77123334733	0.393	0.223610839137454
180	180	hsa:545	2	63	-0.201973070245957	0.032	10.1730350803527	0.67	0.103823134453193
181	181	hsa:549	2	19	-0.177704663327728	0.214	3.4787571095927	0.007	0.0112404293420429
182	182	hsa:554	3	361	0.00161222939183515	0.5	66.2786196892774	0.000999000999000999	0.00429665432561197
183	183	hsa:575	7	2564	-0.0238631779793843	0.079	543.179715234569	0.369	0.132207540957525
184	184	hsa:581	15	2693	-0.0348227004962044	0.045	399.815704088254	0.527	0.112448170928561
185	185	hsa:586	6	1728	-0.00864060483706935	0.324	203.199870214147	0.184	0.227723061860505
186	186	hsa:587	6	1728	-0.0107103731505514	0.301	320.742718631904	0.056	0.0856798672434071
187	187	hsa:593	2	37	-0.168634303857574	0.1	4.72615184944841	0.299	0.134845914277706
188	188	hsa:595	2	514	0.0132518836585704	0.658	69.2684658548689	0.053	0.15191162223019
189	189	hsa:596	2	407	0.00152404945154601	0.527	71.9756460663435	0.203	0.346094664274203
190	190	hsa:597	2	91	-0.0913603276608889	0.188	21.2348360499294	0.001	0.00180086489588525
191	191	hsa:598	4	2030	-0.0232731644137	0.137	332.702943085086	0.085	0.0634987686843957
192	192	hsa:599	3	5	-0.632455532033676	0.233	0.524716570599687	0.613	0.420789540764311
193	193	hsa:604	3	540	-0.0543495902104379	0.059	62.9704164599	0.495	0.132398395340261
194	194	hsa:608	5	1300	-0.0259899938010008	0.147	209.619193037371	0.000999000999000999	0.00144299039791532
195	195	hsa:613	5	2322	-0.0187535507865255	0.169	264.228919341909	0.373	0.237273374910701
196	196	hsa:622	5	486	-0.00824586346762352	0.404	73.3481696377448	0.116	0.190291529231658
197	197	hsa:623	2	138	-0.0669512908941507	0.194	26.622284994465	0.015	0.0199032423955943
198	198	hsa:624	5	2262	-0.0164639575042982	0.188	245.627781807077	0.28	0.207626846137042
199	199	hsa:627	5	2289	-0.00408935401005586	0.399	277.182463640875	0.362	0.423911798170815
200	200	hsa:629	3	13	-0.280224269158902	0.14	2.60575638431881	0.031	0.027949083239975
201	201	hsa:635	6	2352	-0.0153291873961715	0.193	412.858571592167	0.448	0.298130218342822
202	202	hsa:637	3	302	-0.0362185085091527	0.237	39.4184066877887	0.027	0.038724275111728
203	203	hsa:641	14	2668	-0.0280760988558912	0.057	366.463831736458	0.42	0.113288977617724
204	204	hsa:644	2	45	-0.157648923220927	0.103	6.0436691224186	0.774	0.281355655396065
205	205	hsa:645	1	4	NA	1	0.66641218460129	0.233	0.57241502032203
206	206	hsa:648	17	2693	-0.0267944326157756	0.066	379.551666221323	0.539	0.154253853076656
207	207	hsa:650	1	8	NA	1	1.62117799748063	0.215	0.545480208933712
208	208	hsa:652	16	2694	-0.0105792498742592	0.3	387.557811963202	0.422	0.388247102589843
209	209	hsa:653	1	4	NA	1	1.29659884719624	0.017	0.0862672128937407
210	210	hsa:655	6	2175	0.00214725055368691	0.572	366.307172577013	0.052	0.134297962711003
211	211	hsa:658	4	1489	0.0472457790675498	0.978	249.247165705997	0.07	0.252035876516952
212	212	hsa:659	2	57	-0.173937365008029	0.051	8.45390693590869	0.28	0.0749542251991696
213	213	hsa:661	3	567	-0.0434464676885713	0.117	87.3347711570027	0.401	0.190453706064161
214	214	hsa:669	3	226	0.0420113967295402	0.771	28.3185097530252	0.035	0.124467614206768
215	215	hsa:672	3	87	-0.101709061204055	0.126	14.7762720922243	0.028	0.023450701168875
216	216	hsa:675	5	242	-0.0987176746760644	0.046	37.088368897202	0.46	0.102745398939352
217	217	hsa:683	2	68	0.128146668421192	0.911	11.4320342023896	0.109	0.328641934382806
218	218	hsa:685	2	87	-0.0827609792578672	0.185	18.5466656487384	0.072	0.070842268336747
219	219	hsa:701	3	79	-0.164385769414389	0.034	21.4179867923808	0.000999000999000999	0.000383481602542618
220	220	hsa:708	1	11	NA	1	2.48265068519296	0.046	0.18763923859468
221	221	hsa:710	3	23	-0.16869646713466	0.237	4.84479138832691	0.003	0.00586492390912249
222	222	hsa:712	5	1256	-0.0581583480776811	0.004	238.602893461083	0.104	0.00365448732384446
223	223	hsa:713	5	1256	-0.0585734015325647	0.004	232.694888727717	0.076	0.00276593878839365
224	224	hsa:718	3	480	-0.0318281297836337	0.188	80.5446043440088	0.000999000999000999	0.00179925354839947
225	225	hsa:719	4	480	-0.0357786012306358	0.157	101.046455701034	0.000999000999000999	0.00153083065705595
226	226	hsa:722	15	2670	-0.0342540731318456	0.075	320.85406725961	0.495	0.159394876314026
227	227	hsa:725	6	1561	-0.0291310110239765	0.15	303.267893270222	0.019	0.0195522434113995
228	228	hsa:727	5	1536	-0.0264051688640555	0.173	248.395541474215	0.013	0.0159617593439051
229	229	hsa:728	5	488	-0.0406757897858568	0.126	87.0373325189907	0.000999000999000999	0.00125625249457501
230	230	hsa:729	8	2404	-0.0325744318401881	0.089	397.102187273352	0.389	0.151061630815371
231	231	hsa:730	20	2694	-0.0337567345543505	0.093	418.62327747452	0.442	0.172299958217436
232	232	hsa:731	8	1536	-0.0272989540961357	0.163	288.407031339466	0.087	0.07453324059421
233	233	hsa:732	15	2649	-0.0339912396353042	0.088	439.653700805436	0.409	0.155645913479258
234	234	hsa:733	8	1536	-0.0262423011607017	0.175	328.731076077413	0.028	0.0309607483619412
235	235	hsa:735	1	3	NA	1	0.927434439057907	0.006	0.0366959748585245
236	236	hsa:773	2	253	-0.087788420028203	0.048	25.8504027178685	0.319	0.0793026616186858
237	237	hsa:775	2	373	-0.100080082730034	0.008	54.1860900103065	0.000999000999000999	0.000101794753379561
238	238	hsa:776	2	373	-0.100080082730034	0.008	75.4146276291178	0.000999000999000999	0.000101794753379561
239	239	hsa:777	2	95	-0.126933048727306	0.082	13.2803756155285	0.043	0.0234394065535928
240	240	hsa:778	2	302	-0.0869185532044603	0.044	62.2728938428064	0.009	0.00349830215329708
241	241	hsa:781	2	224	-0.0479273966618116	0.183	51.3392754895599	0.028	0.0321470531417118
242	242	hsa:782	2	224	-0.0499747805968792	0.174	43.668053593923	0.035	0.0371557428313154
243	243	hsa:783	2	224	-0.048858025723206	0.177	30.6652288429973	0.537	0.318733774207563
244	244	hsa:784	2	224	-0.048858025723206	0.178	41.0243157613467	0.028	0.031406788127525
245	245	hsa:786	2	224	-0.048858025723206	0.176	41.8409359850364	0.006	0.00829305005094516
246	246	hsa:790	2	70	-0.178947154758038	0.037	15.7403519486964	0.084	0.0210528953308497
247	247	hsa:793	3	346	-0.061309286728968	0.084	38.4131007367256	0.207	0.087843740706297
248	248	hsa:795	6	2158	-0.031759978297725	0.063	315.708668931557	0.471	0.134048303826509
249	249	hsa:800	11	2655	-0.0161008863857516	0.205	420.781997938695	0.416	0.295223610367189
250	250	hsa:801	2	418	-0.0207456485184203	0.312	48.5513226705348	0.129	0.169552546983241
251	251	hsa:805	4	2100	-0.0166011244768484	0.152	262.337557735619	0.274	0.17402624841104
252	252	hsa:808	11	2656	-0.0168239728061592	0.152	333.523647745925	0.561	0.295203915469395
253	253	hsa:810	6	2528	-0.0151875455566166	0.151	489.542543039279	0.302	0.186412024499524
254	254	hsa:811	4	1158	-0.0526947761978812	0.009	183.251593693934	0.419	0.024814745193922
255	255	hsa:814	6	2551	-0.0121351267493952	0.249	467.560293163339	0.492	0.379723217394949
256	256	hsa:815	4	2240	-0.0211133188661362	0.084	423.051990685956	0.513	0.178591256747942
257	257	hsa:820	6	2158	-0.0310087524981138	0.065	458.506661068061	0.077	0.0315180759204058
258	258	hsa:823	4	609	-0.0265651484977453	0.203	86.6563728671222	0.086	0.088127238240835
259	259	hsa:824	2	106	-0.139365933732088	0.039	15.9628965148681	0.313	0.0659879380198416
260	260	hsa:836	6	2521	-0.0167150838303347	0.177	349.703057602015	0.445	0.278929434577055
261	261	hsa:838	6	2030	-0.0236699794255965	0.097	257.606138107417	0.196	0.0943505657034199
262	262	hsa:839	4	1445	-0.0189563692672229	0.191	264.051150895141	0.045	0.0494777590320663
263	263	hsa:840	6	2441	-0.0327301977736095	0.048	329.615490323319	0.313	0.0780963499002999
264	264	hsa:841	3	965	0.0208974169058276	0.777	122.24647860442	0.006	0.0296890646622743
265	265	hsa:842	4	2002	-0.0413715027629538	0.014	303.335420086269	0.23	0.0216975640205511
266	266	hsa:843	5	2230	-0.0454289205856379	0.005	469.724319578578	0.326	0.0120932556805865
267	267	hsa:847	3	575	-0.0442769898905092	0.09	65.6088101691033	0.059	0.0331246478861972
268	268	hsa:857	2	122	-0.0149646229087867	0.425	24.8111997556972	0.027	0.0627405324018327
269	269	hsa:858	5	2231	-0.0324471702961199	0.065	363.801045921289	0.702	0.186498474408874
270	270	hsa:861	2	112	-0.196026529227791	0.011	16.9014009237699	0.61	0.0402878889608703
271	271	hsa:862	4	1463	-0.0138943907186164	0.282	255.971790663053	0.031	0.0501757255419735
272	272	hsa:867	4	2078	-0.0264650734361804	0.091	317.472649540024	0.384	0.152146472984153
273	273	hsa:868	2	482	-0.024134598667547	0.287	66.2947284040157	0.015	0.027758545897446
274	274	hsa:873	2	85	-0.0502096445253434	0.262	17.1271519639653	0.011	0.0197395983920087
275	275	hsa:874	3	224	0.0499076220916788	0.82	32.9740428293316	0.024	0.096986038983206
276	276	hsa:875	16	2691	-0.0129740725497931	0.203	365.744131007367	0.48	0.324330840206003
277	277	hsa:883	2	19	-0.309057549981844	0.052	3.78283772951101	0.26	0.0717044720171262
278	278	hsa:887	4	1213	-0.0214310539153558	0.189	211.747833721418	0.000999000999000999	0.00180782239277915
279	279	hsa:889	16	2694	-0.0126263691919182	0.266	425.690727945948	0.506	0.404525260343562
280	280	hsa:890	2	48	0.126498114806686	0.859	10.9431614306982	0.001	0.00692331806530684
281	281	hsa:891	2	107	-0.0283171960190508	0.36	23.5820132076192	0.001	0.00321458634954509
282	282	hsa:894	2	352	0.0216586324060527	0.694	60.9662938504409	0.185	0.391933941145758
283	283	hsa:896	3	1214	0.0227912931793706	0.817	145.159522082681	0.069	0.218488498005916
284	284	hsa:898	2	73	0.0670154148888581	0.744	12.6996220941329	0.003	0.0158580413473216
285	285	hsa:901	14	2693	-0.0309556149587166	0.03	416.389433904646	0.518	0.0802538114950225
286	286	hsa:902	2	38	-0.320028448237599	0.002	4.89395732335764	0.122	0.00227367552917174
287	287	hsa:916	3	990	-0.0166066783732096	0.272	210.615795701798	0.001	0.00250504070973377
288	288	hsa:917	3	954	-0.0186957097423311	0.246	175.023399625911	0.001	0.00229030403941985
289	289	hsa:919	2	125	-0.135411757561969	0.042	34.698820475627	0.000999000999000999	0.000464846452028559
290	290	hsa:920	4	1176	-0.0250548717108934	0.18	282.068748329961	0.000999000999000999	0.00173050906826502
291	291	hsa:925	4	1083	-0.0319151488723565	0.163	258.093407642096	0.000999000999000999	0.00158322663014083
292	292	hsa:926	5	1860	-0.0462302164450964	0.039	413.457456960721	0.035	0.0103693601607212
293	293	hsa:929	2	142	-0.0835561629905365	0.125	33.7132496087338	0.000999000999000999	0.00124727726286152
294	294	hsa:930	4	1825	-0.0541433585952867	0.012	389.417108829255	0.011	0.00131111753986988
295	295	hsa:933	2	51	-0.237635410314402	0.013	8.47665763255334	0.131	0.0125602446830446
296	296	hsa:941	6	2329	-0.0453522209542632	0.022	414.953238920487	0.233	0.0321576003912324
297	297	hsa:942	4	1194	-0.0257395571443972	0.182	256.06119021262	0.000999000999000999	0.00174772788567647
298	298	hsa:947	4	63	-0.223013825699535	0.033	10.1231056991259	0.748	0.11605429485723
299	299	hsa:948	3	492	0.035733267212666	0.831	93.3012940413024	0.024	0.098021308346983
300	300	hsa:952	4	2036	-0.00451489710131706	0.377	332.935717830286	0.094	0.153799877706271
301	301	hsa:953	3	728	-0.0277799748815517	0.204	144.878688399435	0.991	0.52535874088648
302	302	hsa:955	3	513	-0.0170623908805512	0.32	103.212161697904	0.168	0.210912607329567
303	303	hsa:958	3	664	-0.0253679033263841	0.232	118.807611558575	0.001	0.00217355537922113
304	304	hsa:959	5	1853	-0.0537833321804209	0.013	258.825896094973	0.015	0.0018607896448831
305	305	hsa:960	3	895	-0.0176857258733071	0.28	185.920219872504	0.001	0.00257060186734261
306	306	hsa:961	17	2694	-0.0228687662211262	0.146	370.053822956827	0.47	0.252464730595287
307	307	hsa:962	4	419	-0.0618369362829015	0.112	100.697064549376	0.000999000999000999	0.00112984740553871
308	308	hsa:967	2	93	-0.214005809871372	0.015	10.5270832538077	0.519	0.0455855071477247
309	309	hsa:971	2	47	-0.197315368849508	0.04	14.1535672023514	0.000999000999000999	0.000444660563603733
310	310	hsa:972	4	1639	0.0263084098595762	0.883	322.038668549834	0.005	0.0283564299693492
311	311	hsa:973	3	410	-0.0914649060572503	0.037	93.7370309577432	0.006	0.00208964896509242
312	312	hsa:974	3	410	-0.0927993131865346	0.038	79.3133946635111	0.013	0.00425480967014352
313	313	hsa:978	3	231	-0.0890701259382936	0.041	28.5352521281063	0.997	0.171568442483504
314	314	hsa:983	2	117	0.0199652930524054	0.583	28.0700843608047	0.000999000999000999	0.00492045178256246
315	315	hsa:990	2	43	-0.258722572001267	0.016	12.1860136656869	0.000999000999000999	0.000192510231145776
316	316	hsa:993	2	64	-0.200990451737227	0.035	13.5388403252281	0.008	0.00257060186734261
317	317	hsa:994	5	2287	-0.0323503967308691	0.032	279.187006145742	0.435	0.073420046447136
318	318	hsa:995	1	16	NA	1	3.98728862083445	0.002	0.0144292161968444
319	319	hsa:996	4	1514	-0.0636634074111095	0.003	229.341565828148	0.472	0.0107048457057342
320	320	hsa:998	3	1454	0.0424140275193071	0.953	278.54231400542	0.028	0.123378574490095
321	321	hsa:999	2	72	0.00687391894644375	0.525	12.0144673054166	0.011	0.0355406033053665
322	322	hsa:1003	5	2193	-0.0160014287476162	0.189	417.785700652746	0.342	0.241678431464017
323	323	hsa:1017	2	156	0.0482341300371578	0.756	34.5651410466847	0.002	0.0113314148658519
324	324	hsa:1020	5	2242	-0.0327260312524709	0.063	322.103217925717	0.753	0.19204780673238
325	325	hsa:1021	5	2292	-0.0282430046842969	0.053	450.366110623354	0.248	0.0700810464225608
326	326	hsa:1022	2	38	-0.320028448237599	0.002	6.87357330992098	0.045	0.000928413079887061
327	327	hsa:1026	2	426	-0.0355143835908012	0.177	57.236095736153	0.175	0.138599956024188
328	328	hsa:1027	2	293	-0.0135622430606145	0.371	41.6660304615032	0.13	0.194452462185588
329	329	hsa:1028	2	92	-0.0129699445526079	0.425	14.9327022178112	0.068	0.131319105463662
330	330	hsa:1029	3	667	0.0102311591900247	0.646	79.2859106004504	0.017	0.0605272678525978
331	331	hsa:1030	5	2387	-0.011693531739631	0.254	407.731915868229	0.398	0.332766991486072
332	332	hsa:1031	15	2693	-0.0139285368805468	0.236	323.575142191854	0.465	0.352226041458333
333	333	hsa:1032	14	2693	-0.0168053154377644	0.16	463.321181814712	0.534	0.29561735081813
334	334	hsa:1036	3	191	-0.0575087674075836	0.149	33.2750314921556	0.008	0.00921669027072406
335	335	hsa:1040	3	426	0.0224640769104551	0.716	75.4260793220598	0.002	0.0108097143573554
336	336	hsa:1050	3	855	-0.0526459617522124	0.038	137.125625071573	0.007	0.00245571579028257
337	337	hsa:1051	3	963	-0.00897132408678978	0.365	151.030995915563	0.000999000999000999	0.00325131232489603
338	338	hsa:1054	15	2691	-0.0293103434641247	0.09	419.245600641295	0.492	0.182310597738154
339	339	hsa:1056	5	2048	-0.00815523305278978	0.335	334.060579455663	0.154	0.204524810790003
340	340	hsa:1072	7	2537	-0.0224808608432237	0.121	427.746077795167	0.385	0.189436816048345
341	341	hsa:1080	2	133	0.0172949729282752	0.602	14.8556704966217	0.315	0.504924098252349
342	342	hsa:1081	4	1088	0.0208197067077936	0.768	211.755048287972	0.007	0.0334699581928927
343	343	hsa:1101	6	2456	-0.0209529574014459	0.147	402.340153452685	0.275	0.170120805362004
344	344	hsa:1109	4	1125	-0.0210874486840003	0.232	161.005305951063	0.031	0.0426829807811978
345	345	hsa:1111	2	71	-0.156431864186616	0.054	14.8073443524068	0.003	0.00157592210408257
346	346	hsa:1119	5	634	-0.033776743840618	0.156	117.23464518838	0.279	0.179947487073315
347	347	hsa:1129	2	291	-0.0945830438692655	0.031	57.9899606825209	0.029	0.0072047905436199
348	348	hsa:1131	2	166	-0.0785502074204629	0.111	35.3568347520708	0.008	0.00712756646769523
349	349	hsa:1132	2	133	-0.124307617921978	0.047	30.8789174332939	0.000999000999000999	0.000514904131328276
350	350	hsa:1133	2	165	-0.0670751131523498	0.152	45.0263388937665	0.001	0.00148832776564194
351	351	hsa:1137	6	2387	-0.0398770023528191	0.04	368.24644043211	0.487	0.0961993887853558
352	352	hsa:1141	2	78	0.0769446972829639	0.726	14.1928083368325	0.007	0.0319253801027357
353	353	hsa:1143	5	2004	-0.0404131199243447	0.051	337.862732373936	0.388	0.0974099836401827
354	354	hsa:1152	7	1347	-0.00761238847152347	0.388	213.030499675535	0.37	0.422210277655604
355	355	hsa:1158	7	1347	-0.00648644033747177	0.404	265.59766385464	0.371	0.434347886949736
356	356	hsa:1160	1	1	NA	1	0.226170935603313	0.123	0.380755223603995
357	357	hsa:1173	3	53	-0.0429859354138302	0.302	8.29064396686643	0.508	0.441009954701364
358	358	hsa:1175	3	53	-0.0101143377444306	0.447	8.88773523685918	0.293	0.397206144816431
359	359	hsa:1211	3	53	0.0393231965569315	0.632	8.18872389968317	0.088	0.216306438372849
360	360	hsa:1212	1	3	NA	1	0.783181280299271	0.016	0.0821626649078777
361	361	hsa:1213	5	1377	-0.0061451650727367	0.375	178.401878077642	0.113	0.176330710725305
362	362	hsa:1230	2	218	-0.0808048982172993	0.103	46.0882543802725	0.001	0.00104862050168267
363	363	hsa:1232	2	218	-0.0815994399893475	0.099	44.1316562965225	0.016	0.0117973183451744
364	364	hsa:1234	3	985	-0.0544640931696042	0.031	206.391915104783	0.009	0.00256241935854387
365	365	hsa:1235	2	218	-0.0836652485966728	0.096	47.3559949612551	0.000999000999000999	0.000983224314900734
366	366	hsa:1236	2	218	-0.0835063402422631	0.094	51.6034278734206	0.001	0.000965588282915262
367	367	hsa:1258	3	630	-0.0177936543987857	0.294	89.4306599992365	0.009	0.0183492326403637
368	368	hsa:1259	5	2100	-0.0174173690002093	0.137	292.831965492232	0.363	0.198980036784938
369	369	hsa:1268	2	133	-0.122686214209952	0.049	17.6846967209986	0.085	0.0269935274490083
370	370	hsa:1271	1	35	NA	1	9.26392335000191	0.012	0.0650741835503296
371	371	hsa:1278	3	799	-0.0267130384180995	0.227	136.285299843494	0.001	0.00213165724268961
372	372	hsa:1280	3	799	-0.023680018917306	0.255	131.151009657594	0.023	0.0360037851536818
373	373	hsa:1281	3	799	-0.02663440457919	0.228	131.481047448181	0.003	0.00566868600599374
374	374	hsa:1282	2	149	0.0509976374298039	0.774	27.1724243233958	0.000999000999000999	0.00631334880615755
375	375	hsa:1284	2	149	0.0509976374298039	0.774	26.557392067794	0.000999000999000999	0.00631334880615755
376	376	hsa:1285	5	2261	-0.0221711017638596	0.133	338.156888193305	0.378	0.200606694928296
377	377	hsa:1286	5	2261	-0.0222969485344349	0.134	318.43787456579	0.382	0.203331540647835
378	378	hsa:1287	3	799	-0.0255784644566916	0.235	123.051074550521	0.085	0.0981426439019127
379	379	hsa:1288	6	2456	-0.0224200045929267	0.136	315.191930373707	0.491	0.247499337291105
380	380	hsa:1289	3	799	-0.0277802119461565	0.22	133.751612780089	0.001	0.00207281426255462
381	381	hsa:1290	3	799	-0.0260053338679144	0.235	139.640378669313	0.000999000999000999	0.00219668058728871
382	382	hsa:1291	3	799	-0.0239383872451514	0.247	118.909722487308	0.003	0.00608176486010713
383	383	hsa:1292	2	149	0.0461228632637197	0.756	33.2317440928351	0.000999000999000999	0.00618429802565542
384	384	hsa:1293	3	799	-0.0251740618565858	0.239	129.402641523839	0.000999000999000999	0.00223004107394749
385	385	hsa:1301	3	799	-0.0238709868118004	0.249	127.790319502233	0.000999000999000999	0.00231315208121512
386	386	hsa:1311	2	142	0.0303354448238855	0.669	22.5459785471619	0.000999000999000999	0.00555432137140374
387	387	hsa:1326	2	191	-0.0919664276490933	0.07	30.0120624498988	0.001	0.000739691072114044
388	388	hsa:1352	9	19	0.0444545259789836	0.605	3.23708821620796	0.129	0.277096407390898
389	389	hsa:1355	19	2590	0.000287564429273149	0.497	461.731228766653	0.309	0.441304186923492
390	390	hsa:1356	2	4	-0.707106781186548	0.239	0.51139443447723	0.377	0.306963064259942
391	391	hsa:1364	2	39	0.243776802626415	0.955	8.73229759132725	0.000999000999000999	0.0075892435319829
392	392	hsa:1365	2	39	0.239780461599753	0.958	8.21651334122228	0.000999000999000999	0.00761008238217062
393	393	hsa:1366	1	13	NA	1	3.15257472229645	0.000999000999000999	0.00790085392538984
394	394	hsa:1371	13	2509	0.00369779054933463	0.579	446.956140016032	0.291	0.468548501294589
395	395	hsa:1373	5	1921	0.00295765775602591	0.548	388.720235141428	0.111	0.23112845997995
396	396	hsa:1374	3	733	-0.036574988637886	0.151	106.425773943581	0.085	0.0687388624288987
397	397	hsa:1376	3	364	-0.0275246620014327	0.269	58.0843989769821	0.1	0.12416041989487
398	398	hsa:1378	5	2214	-0.0357519670129495	0.033	408.09859907623	0.326	0.0595143922075802
399	399	hsa:1380	5	2009	-0.00757710087754347	0.358	370.311027980303	0.272	0.324181794000936
400	400	hsa:1385	14	2689	-0.00121113097472054	0.503	453.33721418483	0.476	0.58169093262271
401	401	hsa:1386	4	2243	-0.0125617342864927	0.245	354.6154139787	0.627	0.441382871509528
402	402	hsa:1387	14	2693	-0.00210427385809863	0.481	369.09672863305	0.495	0.57978168814388
403	403	hsa:1390	3	1013	0.0197416802227179	0.763	114.375386494637	0.067	0.203132356020513
404	404	hsa:1392	2	69	0.023082933617327	0.608	14.4663892812154	0.046	0.128000985609308
405	405	hsa:1394	2	161	-0.0901642524323072	0.09	41.1818147116082	0.004	0.00321458634954509
406	406	hsa:1398	4	2044	-0.0402883735833	0.036	330.593312211322	0.221	0.0464139428715317
407	407	hsa:1399	4	2044	-0.0401218582967396	0.036	265.026148032217	0.336	0.0654983940386558
408	408	hsa:1408	15	2693	-0.0137590105043184	0.221	498.845363972974	0.516	0.36163564904928
409	409	hsa:1431	3	286	-0.0109572974905314	0.411	45.3383975264343	0.074	0.136645608339525
410	410	hsa:1432	4	2267	-0.0270172750511788	0.081	316.555674313853	0.175	0.074507704211296
411	411	hsa:1436	2	408	0.111176198769125	0.999	97.2131160056495	0.000999000999000999	0.00789395157279636
412	412	hsa:1437	2	251	-0.0643012173409347	0.162	44.8440661144406	0.373	0.2300016472374
413	413	hsa:1439	3	1189	-0.0380896063670152	0.086	247.945566286216	0.000999000999000999	0.000890255741793977
414	414	hsa:1440	5	2212	-0.0301901668228331	0.089	342.456808031454	0.3	0.123436548752477
415	415	hsa:1441	3	918	-0.0490468008233317	0.066	167.207313814559	0.000999000999000999	0.000700671779094787
416	416	hsa:1445	4	1610	-0.0351218785995412	0.072	239.753559567889	0.026	0.0136295600705348
417	417	hsa:1447	2	84	-0.174212431570846	0.045	9.30327900141237	0.126	0.0349984501342449
418	418	hsa:1452	3	595	0.0527667424975712	0.929	90.3965721265794	0.086	0.281790494052327
419	419	hsa:1453	3	812	0.0193489867264185	0.735	129.089514066496	0.13	0.319911490872669
420	420	hsa:1454	4	1884	0.0215186159321503	0.872	285.056265984655	0.074	0.241377053004041
421	421	hsa:1455	1	3	NA	1	0.893384738710539	0.006	0.0366959748585245
422	422	hsa:1456	1	3	NA	1	0.798221170363018	0.018	0.0903129033795475
423	423	hsa:1457	2	151	-0.00166439268321478	0.489	28.037866931328	0.058	0.129407440853379
424	424	hsa:1459	3	927	0.0494512392360954	0.953	138.722296446158	0.089	0.294082530740046
425	425	hsa:1460	15	2693	-0.0159477453472074	0.195	530.064053135855	0.505	0.326735379343076
426	426	hsa:1478	12	2278	-0.0204452979858754	0.118	376.507691720426	0.432	0.202700983999693
427	427	hsa:1487	3	412	-0.0519970805132571	0.104	69.3935183417948	0.216	0.107733777865581
428	428	hsa:1489	6	2458	-0.0325631742241215	0.064	453.26232011299	0.382	0.11517958545992
429	429	hsa:1491	7	2501	-0.0198901298417592	0.111	334.120433637439	0.432	0.193608826254692
430	430	hsa:1493	2	51	-0.134806216083935	0.137	12.9816391189831	0.064	0.0502989169396722
431	431	hsa:1495	1	12	NA	1	2.76596556857655	0.001	0.00790775527898214
432	432	hsa:1499	3	1616	0.0189857206063864	0.828	230.33137382143	0.011	0.0519028682071501
433	433	hsa:1500	4	1772	-0.021935150230208	0.196	240.061304729549	0.015	0.0200782763510367
434	434	hsa:1509	5	958	-0.0167917739564781	0.26	160.107264190556	0.291	0.270976718218747
435	435	hsa:1511	3	391	-0.0197516996330424	0.309	78.7829140741306	0.000999000999000999	0.00280389525819429
436	436	hsa:1520	2	9	-0.353553390593274	0.231	2.79146467152727	0.018	0.0269551542903336
437	437	hsa:1524	5	2298	-0.0418945307653155	0.022	334.062907966561	0.818	0.0902968334009858
438	438	hsa:1535	3	1048	0.0159380947289743	0.714	165.658968584189	0.001	0.00588666410327603
439	439	hsa:1540	3	631	-0.0473289670806705	0.09	118.970874527618	0.000999000999000999	0.000927575459457581
440	440	hsa:1544	3	860	-0.0263014896785338	0.207	77.4537160743596	0.761	0.448661849353847
441	441	hsa:1545	4	1440	0.0151471674948305	0.773	232.568423865328	0.035	0.124720396682595
442	442	hsa:1551	3	441	0.024434992771348	0.747	56.9013627514601	0.118	0.302231544925451
443	443	hsa:1553	12	2658	-0.00827086555716981	0.347	423.15967477192	0.473	0.460730552723207
444	444	hsa:1555	3	793	-0.0341031841430403	0.15	94.2865213574073	0.575	0.297606075489845
445	445	hsa:1562	4	1064	-0.011519195750843	0.369	244.578921250525	0.111	0.171830529684851
446	446	hsa:1571	7	2561	-0.0188505999734669	0.156	304.689277398175	0.616	0.321191999497766
447	447	hsa:1573	2	134	-0.0637170307766401	0.192	23.0448142917128	0.018	0.0230433756873074
448	448	hsa:1576	14	2688	-0.00114041582016559	0.513	372.827652021224	0.499	0.604802211790727
449	449	hsa:1577	1	32	NA	1	5.17868458220407	0.105	0.341648467526584
450	450	hsa:1581	2	151	-0.0645770019338565	0.171	24.5568576554567	0.033	0.0348587264598926
451	451	hsa:1583	1	6	NA	1	2.21670420277131	0.000999000999000999	0.00790085392538984
452	452	hsa:1586	3	1126	0.0260367387418341	0.836	171.914913921441	0.063	0.207709278503328
453	453	hsa:1588	2	207	0.0404887371384334	0.79	27.6184677634844	0.021	0.0845916663495966
454	454	hsa:1591	3	34	-0.172812769764463	0.124	5.88643737832576	0.004	0.00427003157709472
455	455	hsa:1592	2	125	0.000506231786612216	0.465	21.799213650418	0.093	0.179072081393127
456	456	hsa:1593	3	351	-0.0143762406018877	0.365	54.7560789403367	0.213	0.276330689151582
457	457	hsa:1594	4	1007	-0.021288845264211	0.255	162.377676833225	0.024	0.0373087022766424
458	458	hsa:1603	3	19	0.0611775290321498	0.64	4.41199373974119	0.001	0.00534658712423076
459	459	hsa:1604	7	2550	-0.0267767651643495	0.13	260.935832347215	0.416	0.211847089019141
460	460	hsa:1605	4	1036	-0.0255092803149736	0.213	198.03164484483	0.049	0.0580547489085832
461	461	hsa:1606	3	907	-0.041003556639135	0.073	151.96243844715	0.351	0.119512459362308
462	462	hsa:1607	1	24	NA	1	6.26609917166088	0.014	0.0737617712911363
463	463	hsa:1608	3	907	-0.0423502100717499	0.071	92.9726686261786	0.916	0.242767311871559
464	464	hsa:1609	3	907	-0.0423420485357946	0.07	147.238996831698	0.248	0.0877302628508589
465	465	hsa:1610	1	8	NA	1	2.10726419055617	0.059	0.225982852269509
466	466	hsa:1612	11	2655	-0.0150673125086382	0.223	401.600068710158	0.449	0.330550856995333
467	467	hsa:1613	6	2515	-0.0127258361322772	0.253	518.826621368859	0.249	0.237162800880121
468	468	hsa:1616	6	2416	-0.0361939428256707	0.025	293.802267435202	0.899	0.107775529426585
469	469	hsa:1621	7	2499	-0.00748221766366218	0.337	533.896400351185	0.153	0.204438834242383
470	470	hsa:1622	2	62	0.0754884046939614	0.763	8.58724281406268	0.153	0.367472729206644
471	471	hsa:1629	3	158	0.0593953919994061	0.791	26.3463373668741	0.002	0.0117844214780452
472	472	hsa:1630	6	2453	-0.0251893009485092	0.091	483.47142802611	0.292	0.122972485705188
473	473	hsa:1633	2	117	-0.0690388068659301	0.2	13.7385196778257	0.185	0.158982982554503
474	474	hsa:1634	1	10	NA	1	2.4350879871741	0.034	0.148967421648443
475	475	hsa:1635	1	12	NA	1	2.1824254685651	0.013	0.0694564769797678
476	476	hsa:1638	5	2120	0.00539697088978953	0.606	401.871664694431	0.093	0.218445359535725
477	477	hsa:1643	5	2183	-0.0201385901329453	0.126	375.882772836584	0.116	0.0763779317299924
478	478	hsa:1644	6	2470	-0.00758052084640711	0.318	424.572813680956	0.334	0.344373098768612
479	479	hsa:1647	3	780	-0.0223141810842021	0.229	88.44970798183	0.027	0.0376294392894125
480	480	hsa:1649	4	1916	-0.0266351452036883	0.091	306.403557659274	0.174	0.0814753631408557
481	481	hsa:1654	7	2371	-0.0478281585578434	0.022	316.450013360308	0.566	0.0670649033767674
482	482	hsa:1675	4	480	-0.0304446503266428	0.196	99.5788449059052	0.028	0.0340540903404094
483	483	hsa:1676	16	2694	-0.0198278283919442	0.158	445.448600984846	0.488	0.274690719581865
484	484	hsa:1716	2	102	0.00404246254545282	0.504	21.8681146696187	0.001	0.00433083888210603
485	485	hsa:1718	1	6	NA	1	1.23296560674886	0.024	0.113512834767221
486	486	hsa:1723	5	1385	0.0237729751404492	0.804	232.157231744093	0.093	0.268679109583
487	487	hsa:1729	3	620	-0.0416455944843355	0.115	78.4604725731954	0.004	0.00399477067150132
488	488	hsa:1730	5	2170	-0.0260362864220242	0.094	348.965454059625	0.403	0.161880363175186
489	489	hsa:1736	4	18	-0.194922253869353	0.164	5.43291216551513	0.000999000999000999	0.00159193761777982
490	490	hsa:1737	3	222	-0.0502956098333334	0.18	30.0122151391381	0.487	0.301049824932693
491	491	hsa:1738	2	48	0.0916441826577421	0.779	8.39447264954002	0.001	0.00635469211992086
492	492	hsa:1739	2	78	-0.0890954989772656	0.195	12.3462228499446	0.066	0.0688912600324047
493	493	hsa:1740	11	2653	-0.0109322602633269	0.288	299.260029774402	0.445	0.391461617972053
494	494	hsa:1741	3	317	-0.0183361646011686	0.348	43.2649158300569	0.173	0.229378232384194
495	495	hsa:1742	2	83	-0.126732959786364	0.07	18.0536320952781	0.482	0.148087262350902
496	496	hsa:1743	2	24	-0.0308783197908257	0.443	2.99488491048593	0.636	0.638650088290689
497	497	hsa:1756	3	415	0.00207501358421882	0.522	58.5581936863	0.007	0.0241600025280302
498	498	hsa:1780	4	486	-0.0234365687353168	0.255	70.0607321449021	0.347	0.303054243774528
499	499	hsa:1781	2	22	0.0416125189288239	0.602	4.15719357178303	0.053	0.141820932018591
500	500	hsa:1783	6	2182	-0.0077804893405422	0.324	321.507195480398	0.065	0.102359598004139
501	501	hsa:1785	4	1802	-0.045648573583255	0.016	299.520212238042	0.142	0.016101879335896
502	502	hsa:1786	1	6	NA	1	1.38263923350002	0.042	0.175143597749348
503	503	hsa:1788	12	2660	-0.011979332486561	0.237	432.436118639539	0.398	0.317029536167366
504	504	hsa:1789	3	118	-0.0169710564297652	0.405	20.3029354506241	0.07	0.129364685853718
505	505	hsa:1793	7	2551	-0.0192240548225026	0.191	408.379432759476	0.443	0.293578964320893
506	506	hsa:1794	2	179	-0.0788284979245496	0.118	48.0251937244723	0.000999000999000999	0.00118422317801413
507	507	hsa:1796	5	2031	-0.0407987973995259	0.027	290.970034736802	0.411	0.0610454900584148
508	508	hsa:1798	8	36	0.109524191514541	0.809	8.03645455586517	0.001	0.00656884671749278
509	509	hsa:1806	2	56	-0.0909397154984417	0.221	12.1435278848723	0.376	0.289818798020153
510	510	hsa:1807	3	95	-0.124890800935307	0.086	11.2582738481505	0.573	0.197618456862314
511	511	hsa:1808	16	2694	-0.00661762356255877	0.374	443.229033858839	0.441	0.462179685189561
512	512	hsa:1812	2	108	-0.00370617531138866	0.508	16.6750391266175	0.157	0.28144164127657
513	513	hsa:1813	2	192	-0.104620789543401	0.048	43.4013436653052	0.006	0.00263593442241456
514	514	hsa:1814	2	133	-0.125388553729995	0.05	20.0198114287896	0.044	0.0156624554209593
515	515	hsa:1815	2	133	-0.12755042534603	0.043	30.8554414627629	0.149	0.0387646830214359
516	516	hsa:1827	2	54	-0.25421670985506	0.012	8.09928617780662	0.319	0.0251324002190384
517	517	hsa:1841	2	107	0.0193029814347316	0.598	25.4264610451578	0.013	0.0455320882514961
518	518	hsa:1843	2	218	0.0166412316113484	0.592	35.9243043096538	0.001	0.00499174632246352
519	519	hsa:1844	2	218	0.0190399676994707	0.604	34.2099858762454	0.000999000999000999	0.00507633692273624
520	520	hsa:1845	3	1090	0.0350912043479949	0.927	157.461006985533	0.004	0.0244626498367808
521	521	hsa:1846	2	218	0.0190399676994707	0.608	30.4540596251479	0.01	0.0371047235446647
522	522	hsa:1847	2	218	0.0169410736223637	0.595	37.2194526090774	0.005	0.020282095938954
523	523	hsa:1848	11	2667	-0.0209468439722277	0.156	319.289155246784	0.482	0.26976712315365
524	524	hsa:1849	4	1936	-0.0105130427176257	0.287	386.890750849334	0.085	0.114982834006001
525	525	hsa:1850	4	1936	-0.00895965706816551	0.319	462.972668626179	0.088	0.128372768689765
526	526	hsa:1852	4	1936	-0.0105767287602952	0.289	414.44978432645	0.098	0.129264904431036
527	527	hsa:1855	2	281	0.0159697779490983	0.617	54.9610642439974	0.159	0.325872397465368
528	528	hsa:1856	1	23	NA	1	3.42203305722029	0.053	0.208685558367791
529	529	hsa:1857	1	23	NA	1	4.13123640111463	0.126	0.387005644875863
530	530	hsa:1869	2	52	-0.1346146150746	0.107	11.5190670687483	0.000999000999000999	0.00108428960134905
531	531	hsa:1870	4	1319	-0.0521065258761625	0.02	252.265602931633	0.472	0.0534568253809054
532	532	hsa:1871	1	7	NA	1	2.33408405542619	0.001	0.00790775527898214
533	533	hsa:1874	2	85	-0.153747023522471	0.06	15.2391495209375	0.579	0.151461658621197
534	534	hsa:1875	2	85	-0.15682196399292	0.057	14.3811123411078	0.116	0.0397967624827425
535	535	hsa:1892	4	495	0.0119066365306962	0.618	70.0175974348208	0.052	0.142612446081547
536	536	hsa:1901	14	2693	-0.0190199052049521	0.127	443.517387487117	0.499	0.238201196253669
537	537	hsa:1902	2	291	-0.0412040109149313	0.181	58.1482994235981	0.022	0.0259864168140404
538	538	hsa:1906	3	880	-0.0312196717047709	0.133	130.408176508761	0.427	0.219689021861241
539	539	hsa:1909	4	1368	-0.00168889291983345	0.491	258.088597931061	0.001	0.00423196161721335
540	540	hsa:1910	2	163	-0.116405804997669	0.036	19.7221055846089	0.823	0.133889981389128
541	541	hsa:1917	7	2308	-0.0305554443075329	0.039	313.868420048097	0.465	0.0908547451657943
542	542	hsa:1938	6	2322	-0.0198830720593305	0.107	269.252166278581	0.495	0.208582735590852
543	543	hsa:1942	7	2566	-0.0152435429639347	0.232	316.207428331488	0.377	0.300572484891412
544	544	hsa:1944	3	979	-0.00293512206793551	0.433	171.262930869947	0.03	0.0694130450734122
545	545	hsa:1947	4	1114	0.0218619503602833	0.788	154.495476581288	0.037	0.132225216859055
546	546	hsa:1948	4	1114	0.0183397046457422	0.747	163.709165171585	0.04	0.13477570965128
547	547	hsa:1949	4	1114	0.0201033835594094	0.767	159.425468565103	0.009	0.0412509417344373
548	548	hsa:1950	15	2693	-0.00730575006354318	0.366	411.015956025499	0.474	0.477370701429123
549	549	hsa:1956	15	2694	-0.0111811071599068	0.304	371.500438981563	0.467	0.419111342127096
550	550	hsa:1958	3	361	-0.0315634544969925	0.235	61.5054013818376	0.004	0.00749145284173822
551	551	hsa:1960	4	934	-0.0198253690075242	0.238	142.057640187808	0.189	0.184493352243846
552	552	hsa:1962	15	2691	-0.00356112298925553	0.431	434.519754170325	0.462	0.520472565963346
553	553	hsa:1964	9	2555	-0.00291917909002563	0.438	269.21888002443	0.419	0.494669002782663
554	554	hsa:1965	2	73	-0.0312215979997936	0.396	11.6305302133832	0.006	0.0167325924208966
555	555	hsa:1967	2	15	-0.191389750587738	0.253	2.93010650074436	0.067	0.0860674896533359
556	556	hsa:1968	7	2254	-0.00382473568343134	0.412	247.93877161507	0.422	0.478035920119037
557	557	hsa:1969	3	1149	-0.0191380049270332	0.204	140.016604954766	0.26	0.208803041811864
558	558	hsa:1974	7	2397	-0.0264370312459133	0.056	396.929381226858	0.404	0.108340544013199
559	559	hsa:1975	6	2385	-0.0267962042496557	0.049	352.415085696835	0.462	0.108393582098258
560	560	hsa:1977	2	18	-0.266775576888347	0.096	2.75691873115242	0.371	0.154393946183311
561	561	hsa:1978	15	2694	-0.0166208804609846	0.206	347.454288659007	0.522	0.347324790076537
562	562	hsa:1981	3	23	-0.138138593542267	0.224	5.24812001374203	0.026	0.0357929526461431
563	563	hsa:1983	3	19	0.13319320367472	0.782	2.97736382028476	0.017	0.0707299622408844
564	564	hsa:1992	6	1992	-0.0297808673764792	0.101	283.160819941215	0.065	0.0395607081931077
565	565	hsa:2001	2	84	-0.181786885117405	0.039	12.1592930488224	0.155	0.0369260263402635
566	566	hsa:2002	4	1987	-0.0149313262617847	0.224	303.401572699164	0.187	0.174788398689099
567	567	hsa:2005	3	1057	0.0363140795910932	0.919	144.528877352369	0.027	0.11653146476459
568	568	hsa:2017	4	1606	-0.0177594576223254	0.218	213.014696339275	0.068	0.0772553914789463
569	569	hsa:2023	14	2688	-0.016066852067198	0.152	412.582280413788	0.52	0.279627808866881
570	570	hsa:2026	2	182	0.0278429227711595	0.703	27.8213535901057	0.003	0.0151036907651169
571	571	hsa:2027	11	2652	-0.0171368493808712	0.146	389.503950834065	0.386	0.21843960743808
572	572	hsa:2033	2	669	-0.0183548823183473	0.313	85.713402297973	0.301	0.316762675634343
573	573	hsa:2034	3	888	-0.038829956701265	0.087	167.853456502653	0.38	0.145775795028641
574	574	hsa:2035	6	2168	-0.0265965687516956	0.074	459.547505439554	0.25	0.0923147141176103
575	575	hsa:2036	4	486	0.0191179338322234	0.693	58.8257815780433	0.002	0.0105077280622052
576	576	hsa:2037	4	486	0.0276271523815475	0.768	69.8513188533038	0.003	0.0162964420672861
577	577	hsa:2041	5	2041	-0.0217277462738717	0.16	310.94468832309	0.24	0.163572396264517
578	578	hsa:2042	3	461	0.0112052299814158	0.588	54.2062068175745	0.032	0.0935728656599156
579	579	hsa:2043	6	2398	-0.0208213914351621	0.148	285.846547314578	0.221	0.144573794638376
580	580	hsa:2044	6	2398	-0.0202495190338584	0.153	414.398099018972	0.237	0.15653919009703
581	581	hsa:2045	16	2693	-0.0256396245272372	0.129	329.441310073673	0.486	0.236324376575144
582	582	hsa:2047	6	2391	-0.0163893675680219	0.197	409.479596900408	0.183	0.155842008204351
583	583	hsa:2048	16	2693	-0.0220595053860662	0.161	409.463144634882	0.491	0.279655723914962
584	584	hsa:2050	4	1317	0.00113363934921098	0.524	197.542199488491	0.004	0.0150235505782489
585	585	hsa:2051	7	2530	-0.0162418578089606	0.199	471.378554796351	0.251	0.1996338053129
586	586	hsa:2052	2	87	0.0630934472002106	0.736	13.7421460472573	0.001	0.00604571040327726
587	587	hsa:2053	4	793	-0.0312944118902446	0.164	162.294957437875	0.233	0.16295911211326
588	588	hsa:2054	2	15	-0.106242543051946	0.354	1.9663320227507	0.536	0.5051136095665
589	589	hsa:2056	4	1908	-0.0227421679726648	0.136	460.247280222926	0.151	0.100330185356047
590	590	hsa:2057	1	35	NA	1	9.24827270298126	0.000999000999000999	0.00790085392538984
591	591	hsa:2060	3	908	0.00938661160036752	0.621	138.677520326755	0.008	0.0313219380578556
592	592	hsa:2064	2	588	-0.0553142276959457	0.034	94.1632247967324	0.174	0.0362656404471343
593	593	hsa:2065	4	2082	-0.0112117477904884	0.283	295.11039431996	0.231	0.243687398676226
594	594	hsa:2066	2	454	0.0566990435429762	0.924	70.4082528533801	0.079	0.264052126868921
595	595	hsa:2069	5	2193	-0.00884603664200459	0.311	307.217963888995	0.264	0.28734499642481
596	596	hsa:2081	5	2165	-0.046008962433987	0.027	267.6765278467	0.241	0.0392689430673597
597	597	hsa:2091	12	2373	-0.0270425888787939	0.048	421.655456731687	0.299	0.0752599644540501
598	598	hsa:2099	2	327	-0.0945058287758901	0.019	45.29980532122	0.612	0.0634230573372079
599	599	hsa:2100	3	1307	0.0402936451651918	0.967	200.875329236172	0.021	0.0994391069105609
600	600	hsa:2107	7	2270	-0.0285658797653455	0.037	256.491888384166	0.284	0.0583784382224252
601	601	hsa:2113	4	2031	-0.00517751357365773	0.388	300.049700347368	0.136	0.208003558350898
602	602	hsa:2114	10	2649	-0.0149314776904318	0.226	410.341336794289	0.411	0.313618650422967
603	603	hsa:2122	6	2508	-0.034273400310961	0.035	513.332824369203	0.821	0.13073388778609
604	604	hsa:2146	18	2694	-0.0169290797343746	0.208	497.092071611253	0.519	0.348260556977919
605	605	hsa:2147	3	454	-0.0209958695352339	0.3	93.354239035004	0.002	0.00505114854164888
606	606	hsa:2149	2	294	-0.0745579346092657	0.063	47.6348818567011	0.035	0.0156930462330337
607	607	hsa:2150	4	1267	-0.0244810096779174	0.151	173.317898996068	0.98	0.430722152560751
608	608	hsa:2151	1	5	NA	1	1.05809825552544	0.001	0.00790775527898214
609	609	hsa:2152	5	454	-0.0232464724959244	0.284	65.2409436194984	0.093	0.122391539465475
610	610	hsa:2153	3	34	-0.223127539601251	0.064	6.52399129671336	0.585	0.160430985088836
611	611	hsa:2155	2	7	-0.552052447473883	0.09	1.52414398595259	0.178	0.0822453557442176
612	612	hsa:2157	12	2649	-0.00511578403731843	0.405	386.795091040959	0.431	0.479243440778612
613	613	hsa:2158	7	2346	-0.0363346909432099	0.054	228.511699812956	0.395	0.103400177122821
614	614	hsa:2159	2	20	-0.0633247586861304	0.382	4.43291216551513	0.04	0.0791688963673247
615	615	hsa:2160	4	454	-0.016894142428718	0.336	106.685307477955	0.019	0.0386484833138403
616	616	hsa:2161	4	760	-0.0433356197331267	0.075	134.015497957781	0.011	0.00668260491659442
617	617	hsa:2162	4	454	-0.0138901767978209	0.364	100.283734778791	0.001	0.00324628183527923
618	618	hsa:2165	7	2346	-0.0377332534865684	0.044	405.208497156163	0.272	0.0649326096895522
619	619	hsa:2167	2	61	-0.0928877155295032	0.217	11.6345383059129	0.19	0.172695529923217
620	620	hsa:2168	6	2450	-0.00901553543774162	0.311	339.002786578616	0.456	0.418814533380559
621	621	hsa:2170	4	1270	0.000111006756716586	0.522	140.574913157995	0.065	0.148730651907311
622	622	hsa:2176	14	2668	-0.0250662024791861	0.079	454.586593884796	0.432	0.149399999537615
623	623	hsa:2178	5	572	-0.0354560133355133	0.158	95.1291750963851	0.004	0.00528770457553261
624	624	hsa:2181	16	2693	-0.00417298647791953	0.437	462.712867885636	0.531	0.571024817578461
625	625	hsa:2182	6	2457	-0.00321150409446591	0.441	434.901706302248	0.296	0.39632116260345
626	626	hsa:2184	6	168	0.127266067751775	0.979	23.9921365041799	0.001	0.00776247035820966
627	627	hsa:2185	3	1322	-0.0492610938888144	0.043	239.856777493606	0.000999000999000999	0.000474903424107856
628	628	hsa:2188	2	8	-0.5	0.111	1.32904531053174	0.215	0.113008944670232
629	629	hsa:2194	3	239	-0.0193860600941692	0.362	36.3809978241783	0.148	0.21037441858153
630	630	hsa:2203	10	2636	-0.0125201184329328	0.22	510.406000687101	0.335	0.265891357760291
631	631	hsa:2207	2	224	-0.0589627677769296	0.137	55.0433255716303	0.000999000999000999	0.00135447002112716
632	632	hsa:2208	3	171	-0.0403518527941904	0.26	35.7046226667176	0.678	0.482245959324392
633	633	hsa:2212	2	298	-0.0500601981709121	0.117	62.9714852845746	0.003	0.00314310824140894
634	634	hsa:2213	3	601	-0.0442087350938018	0.17	132.446348818567	0.000999000999000999	0.00164407689871329
635	635	hsa:2222	11	2533	-0.0140142275367158	0.215	333.805779287705	0.445	0.320204922345863
636	636	hsa:2224	3	815	-0.0515227239679964	0.035	136.400236668321	0.955	0.147018229889104
637	637	hsa:2235	14	2272	-4.32636308769916e-05	0.503	295.08077260755	0.338	0.471257469947751
638	638	hsa:2241	5	2193	-0.0158293454724649	0.191	320.217658510516	0.131	0.117299444003853
639	639	hsa:2243	4	1396	-0.0273995526603001	0.146	238.397182883536	0.064	0.0530087068494627
640	640	hsa:2244	4	1396	-0.0283715391924835	0.143	203.854143604229	0.054	0.0452793514861638
641	641	hsa:2245	2	104	-0.133289610258004	0.042	21.1133717601252	0.000999000999000999	0.000464846452028559
642	642	hsa:2246	3	1058	0.0120183308601195	0.664	212.160590907356	0.124	0.287924615255598
643	643	hsa:2250	3	955	0.0140614433103392	0.684	217.274573424438	0.021	0.0753108858304093
644	644	hsa:2251	5	2272	-0.00802317954297182	0.331	431.121349772875	0.223	0.266185947206524
645	645	hsa:2252	3	955	0.0100022934144191	0.628	123.696033897011	0.051	0.142240984333942
646	646	hsa:2254	4	1813	0.0172043766548321	0.791	253.116196511051	0.03	0.112504290898523
647	647	hsa:2257	3	955	0.0105589278938174	0.635	154.086460281712	0.061	0.164662938001885
648	648	hsa:2258	16	2694	-0.0093552915409607	0.336	328.443485895331	0.524	0.481870919701361
649	649	hsa:2260	3	1417	0.0159227880220459	0.735	232.375195633088	0.007	0.0322577603853866
650	650	hsa:2261	3	1279	-0.0119526859146561	0.301	185.231476886666	0.001	0.00274162848825784
651	651	hsa:2263	4	1962	-0.0203873287907469	0.148	260.234492499141	0.268	0.167672075549532
652	652	hsa:2264	1	53	NA	1	8.96033897011108	0.017	0.0862672128937407
653	653	hsa:2266	4	1396	-0.0272440348151508	0.143	305.499141123029	0.052	0.0438829755470382
654	654	hsa:2268	1	19	NA	1	5.31572317440928	0.003	0.0204274289709421
655	655	hsa:2271	2	21	-0.138873014965883	0.228	3.67351223422529	0.129	0.133129080454952
656	656	hsa:2274	3	602	-0.036362925716239	0.15	76.0620681757453	0.05	0.0441963919382991
657	657	hsa:2277	2	316	-0.0613263260038991	0.103	49.1226094590984	0.695	0.260345319204698
658	658	hsa:2308	2	530	-0.0520557297934325	0.075	85.8341031415811	0.282	0.10270684014931
659	659	hsa:2316	2	236	0.0308685647748503	0.736	38.1315417795931	0.002	0.0110711081567703
660	660	hsa:2317	5	2317	-0.0365161725723272	0.017	321.047448181089	0.855	0.0760354301531578
661	661	hsa:2318	5	2317	-0.0368066929171499	0.017	305.835630033973	0.311	0.0330041202432403
662	662	hsa:2319	6	2244	-0.0237505800650887	0.088	299.537886017483	0.364	0.142254748663206
663	663	hsa:2321	15	2693	-0.0121173613869517	0.282	342.791044776119	0.518	0.427071919482537
664	664	hsa:2322	5	2349	-0.0349912622120102	0.038	271.194297056915	0.283	0.0594962630413949
665	665	hsa:2323	2	15	0.20865621238292	0.801	3.97018742604115	0.000999000999000999	0.00650614379430013
666	666	hsa:2324	3	1263	0.00612255455626586	0.587	164.781921594076	0.011	0.0390170066346862
667	667	hsa:2326	2	61	-0.102607178848188	0.204	11.8560903920296	0.2	0.171322186460938
668	668	hsa:2327	2	61	-0.102607178848188	0.203	12.963316410276	0.432	0.301137451966531
669	669	hsa:2328	8	2562	-0.0111325211401282	0.286	440.264954002367	0.312	0.304862516390575
670	670	hsa:2329	2	61	-0.102607178848188	0.202	13.5772798412032	0.137	0.126947886781855
671	671	hsa:2330	2	61	-0.102607178848188	0.204	9.62381188685727	0.571	0.36692475777339
672	672	hsa:2335	3	791	-0.0300448128062983	0.206	119.990647784097	0.000999000999000999	0.00195270587536324
673	673	hsa:2339	4	815	-0.046392170009536	0.044	106.328930793602	0.53	0.110966912156096
674	674	hsa:2353	2	503	0.0630849105845706	0.954	70.5270069091881	0.011	0.0583146502343527
675	675	hsa:2354	2	277	0.0400326626923849	0.776	46.8496774439821	0.001	0.0063332138373181
676	676	hsa:2355	3	899	0.0142794787718043	0.698	120.823529411765	0.000999000999000999	0.00576550158537805
677	677	hsa:2356	2	8	-0.5	0.123	0.878955605603695	0.652	0.282553094454787
678	678	hsa:2357	4	1425	0.0209444638355598	0.788	302.577776081231	0.055	0.179370360119756
679	679	hsa:2475	4	2209	-0.0398160748971177	0.019	251.330648547544	0.729	0.0731249395758769
680	680	hsa:2488	4	361	-0.00552714233871834	0.442	53.8213154177959	0.000999000999000999	0.00385268579209699
681	681	hsa:2492	1	3	NA	1	0.771882276596557	0.02	0.0982404601085629
682	682	hsa:2494	4	1001	0.0345618108173827	0.907	210.750543955415	0.11	0.329728650024999
683	683	hsa:2520	3	68	-0.022391401951224	0.427	16.0237813490094	0.000999000999000999	0.00373666635488946
684	684	hsa:2524	4	202	-0.0257408827747983	0.332	26.0628697942512	0.114	0.161769056419446
685	685	hsa:2525	2	26	-0.0526234811584217	0.428	6.28568156659159	0.369	0.449409833329181
686	686	hsa:2528	1	8	NA	1	2.13879451845631	0.057	0.220288128635412
687	687	hsa:2529	3	36	-0.167609274768407	0.1	9.49772874756651	0.167	0.0850421875446425
688	688	hsa:2530	4	197	-0.0341076568514135	0.301	23.3456120929877	0.438	0.398965701150722
689	689	hsa:2531	4	1233	-0.0224044947700936	0.154	169.211321907089	0.691	0.344825855075554
690	690	hsa:2533	3	263	-0.0789930469811621	0.081	68.4481047448181	0.001	0.000844105973666639
691	691	hsa:2534	5	2309	-0.0302717489443979	0.084	331.245409779746	0.413	0.15130035199642
692	692	hsa:2535	1	22	NA	1	5.00076344619613	0.013	0.0694564769797678
693	693	hsa:2539	7	2461	-0.000276147540892343	0.491	472.08481887239	0.225	0.35384767193947
694	694	hsa:2548	14	2689	0.00178037357446547	0.559	345.65683093484	0.493	0.630777831532403
695	695	hsa:2549	4	1845	-0.0294231288791401	0.095	276.901019200672	0.089	0.0488106921430201
696	696	hsa:2550	2	133	-0.125929021634004	0.047	16.0171011947933	0.986	0.188691027333738
697	697	hsa:2554	2	21	-0.0278828592271009	0.445	3.36507997098904	0.036	0.0822453557442176
698	698	hsa:2555	6	2261	-0.0125748679245011	0.24	337.332480818414	0.201	0.194482778889409
699	699	hsa:2556	4	546	-0.0312701657890364	0.211	103.086536626331	0.28	0.226209215483524
700	700	hsa:2557	2	21	0.0139414296135505	0.52	4.95045234187121	0.045	0.111267450604872
701	701	hsa:2558	8	2557	-0.0158776888864243	0.164	239.979883192732	0.308	0.201317816064074
702	702	hsa:2560	15	2693	-0.0180040217536864	0.135	475.550521052029	0.468	0.237668469614366
703	703	hsa:2561	4	546	-0.0297085774852041	0.214	117.741382601061	0.123	0.122064331637218
704	704	hsa:2562	6	2261	-0.0130345060225669	0.235	255.59957247013	0.14	0.145229898237836
705	705	hsa:2563	8	2557	-0.0147932465853596	0.183	354.768713974883	0.223	0.171350977127143
706	706	hsa:2564	8	2557	-0.0152768200600215	0.171	376.733557277551	0.44	0.26989131793709
707	707	hsa:2566	1	7	NA	1	1.31602855288774	0.018	0.0903129033795475
708	708	hsa:2568	3	86	0.0341634119320412	0.662	11.2063595068138	0.029	0.0950867182048392
709	709	hsa:2571	5	1729	0.0573113813077387	0.998	301.040882543803	0.097	0.322852492422683
710	710	hsa:2572	2	76	-0.0844355485930184	0.203	10.4987975722411	0.83	0.468550282176434
711	711	hsa:2581	2	48	-0.121059338653312	0.158	8.07458869336183	0.305	0.194331174632018
712	712	hsa:2582	3	195	-0.066321295484249	0.14	23.2207886399206	0.198	0.127112862621187
713	713	hsa:2584	2	17	NA	1	3.47062640760392	0.149	0.432667536982465
714	714	hsa:2585	8	2570	0.00490729741679273	0.638	560.099324350116	0.35	0.558080095526374
715	715	hsa:2588	2	19	0.324442842261525	1	2.75691873115242	0.207	0.533032552543371
716	716	hsa:2589	4	44	-0.138167946949202	0.137	6.13432835820895	0.604	0.288952328269292
717	717	hsa:2593	6	1347	-0.00800548500408372	0.387	173.207886399206	0.374	0.424491958312704
718	718	hsa:2618	2	56	-0.00867296304536376	0.466	8.92606023590487	0.21	0.325307914090837
719	719	hsa:2619	6	1169	0.0406001698036733	0.927	156.432339580868	0.047	0.180088513742901
720	720	hsa:2625	2	63	-0.0942698575564978	0.197	13.5937702790396	0.042	0.0479448282833417
721	721	hsa:2626	5	2150	-0.0287752599086891	0.08	270.936748482651	0.054	0.0278402394674568
722	722	hsa:2628	3	201	-0.0218491785115079	0.335	27.8661678818185	0.088	0.133368793879766
723	723	hsa:2632	5	1930	0.0179905434440835	0.815	221.738252471657	0.089	0.262844069449492
724	724	hsa:2639	16	2691	-0.00161937267067389	0.491	370.527694010765	0.499	0.589604440075477
725	725	hsa:2641	4	361	0.00183874598631622	0.499	87.3776768332252	0.000999000999000999	0.00428905901829209
726	726	hsa:2643	4	9	-0.447213595499958	0.09	1.57880673359545	0.24	0.104437338428708
727	727	hsa:2645	2	210	-0.0497549449410428	0.222	28.6135053632095	0.601	0.40216569466499
728	728	hsa:2648	2	95	-0.0259047038218993	0.395	12.716379738138	0.01	0.025809456815273
729	729	hsa:2650	14	2675	-0.00591005764634434	0.37	273.083406496927	0.437	0.456301202820586
730	730	hsa:2651	4	199	-0.0290110670059245	0.318	25.7629499561018	0.513	0.458925849358394
731	731	hsa:2673	1	11	NA	1	2.46623659197618	0.068	0.25080083501881
732	732	hsa:2687	3	145	-0.0309979569884022	0.321	26.4659693858075	0.533	0.473165905789291
733	733	hsa:2690	3	898	-0.0496353834384379	0.064	149.914455853724	0.688	0.181536830849909
734	734	hsa:2697	2	404	-0.062493445648715	0.053	57.2180784059243	0.436	0.110169155475767
735	735	hsa:2710	6	2480	0.00412952022030119	0.611	471.617818834218	0.233	0.419881893799948
736	736	hsa:2717	2	54	-0.0652666668968778	0.301	6.94965072336527	0.481	0.424575063618836
737	737	hsa:2719	3	183	-0.0180152863834708	0.361	23.657785242585	0.015	0.0336736236880355
738	738	hsa:2720	1	15	NA	1	2.88006260258808	0.035	0.152334252612245
739	739	hsa:2729	4	145	-0.0469837843575229	0.233	23.2391113486277	0.849	0.518362222217261
740	740	hsa:2730	5	402	0.0253902552094482	0.737	51.8423865328091	0.102	0.269720542211133
741	741	hsa:2731	4	358	-0.013361580455199	0.349	39.0881398633431	0.046	0.0823858728792847
742	742	hsa:2734	6	2036	-0.0386262576700207	0.024	291.523953124404	0.352	0.04877727826345
743	743	hsa:2735	2	221	-0.00378190472506335	0.472	55.0417605069283	0.091	0.178150810572899
744	744	hsa:2736	1	31	NA	1	6.86319044165362	0.043	0.178301872021409
745	745	hsa:2737	3	1047	0.0480354188435522	0.947	118.621139825171	0.055	0.205989835190139
746	746	hsa:2739	2	14	-0.127738077005317	0.368	2.50948581898691	0.553	0.52749653559703
747	747	hsa:2740	2	55	0.126024169720691	0.876	12.1712791541016	0.062	0.212523403572649
748	748	hsa:2744	2	42	-0.0573479895609086	0.346	5.83192731992213	0.368	0.389749587622752
749	749	hsa:2752	2	40	-0.126474394433756	0.175	7.74290949345345	0.079	0.073013650814007
750	750	hsa:2762	5	236	0.131163421963899	0.993	27.6165973203038	0.012	0.0647023695770662
751	751	hsa:2766	2	124	-0.0291548558540746	0.347	16.0097339390006	0.23	0.28157817729841
752	752	hsa:2767	3	984	-0.0531834436813281	0.02	121.714929190365	0.778	0.0803370853892083
753	753	hsa:2769	3	821	-0.0476312778373325	0.04	167.510058403634	0.494	0.0973001287924493
754	754	hsa:2770	3	1737	0.00113939989629806	0.51	265.204069168225	0.009	0.0293019874200354
755	755	hsa:2771	4	2242	-0.0248545237137948	0.089	422.055006298431	0.323	0.130776480953428
756	756	hsa:2773	4	2242	-0.0249012454877971	0.09	368.873229759133	0.487	0.180905553390289
757	757	hsa:2774	1	18	NA	1	5.08959041111578	0.005	0.0314915868327402
758	758	hsa:2775	1	76	NA	1	11.0729091117303	0.045	0.184549175514532
759	759	hsa:2778	13	2678	-0.00752227602925776	0.355	378.14990266061	0.447	0.4507977708814
760	760	hsa:2779	5	1888	-0.00156701884719916	0.432	191.264915830057	0.192	0.289440519590997
761	761	hsa:2780	17	2694	-0.0138055616787126	0.251	305.421193266404	0.469	0.369573485532614
762	762	hsa:2781	3	910	0.0015430903495327	0.515	126.606367141276	0.018	0.0526626095074786
763	763	hsa:2782	4	2218	-0.0269677736650534	0.057	323.099706073214	0.452	0.120028733469705
764	764	hsa:2783	4	2218	-0.0292256404542417	0.045	245.642478146353	0.642	0.13128366459652
765	765	hsa:2784	4	2218	-0.028907538245216	0.047	351.436882085735	0.292	0.072580872029303
766	766	hsa:2785	4	2218	-0.029255840031048	0.045	283.047677214948	0.77	0.151159154223447
767	767	hsa:2786	2	605	0.0268416832609629	0.771	88.4551666221323	0.034	0.121671275949598
768	768	hsa:2788	4	2218	-0.0290394097306032	0.049	393.29774401649	0.43	0.102398199428068
769	769	hsa:2791	4	2218	-0.0285411167133002	0.05	370.96045348704	0.762	0.162593311979965
770	770	hsa:2796	4	516	0.0388539227013566	0.837	89.8970111081421	0.003	0.0175445433132036
771	771	hsa:2797	3	106	0.0739707309442355	0.807	18.9588120777188	0.000999000999000999	0.00654886255419793
772	772	hsa:2799	4	603	-0.00532720930352084	0.441	92.5810207275642	0.194	0.295897708061592
773	773	hsa:2805	11	2655	-0.0136218846936802	0.192	402.109020116807	0.501	0.321416822690048
774	774	hsa:2806	2	124	0.0702582306255257	0.824	16.0471809749208	0.001	0.00667550418311716
775	775	hsa:2810	15	2693	-0.0248936215123956	0.068	411.434629919456	0.46	0.139658204644181
776	776	hsa:2811	4	1815	-0.0514705859556344	0.011	372.726151849448	0.02	0.00207281426255462
777	777	hsa:2814	4	1815	-0.0538061362313001	0.009	218.329656067489	0.709	0.0386333207275861
778	778	hsa:2815	4	1815	-0.0535877264102993	0.01	315.94285605222	0.521	0.0325998839549599
779	779	hsa:2817	2	30	0.260214524471793	0.951	6.29644615795702	0.001	0.00756805466714336
780	780	hsa:2819	14	2672	0.00530435500776719	0.668	420.985914417681	0.517	0.712531422827655
781	781	hsa:2820	15	2689	0.00475551174418488	0.657	291.069244569989	0.466	0.668547866864997
782	782	hsa:2821	3	408	0.0774984532386051	0.972	56.5357101958239	0.008	0.0455418019351434
783	783	hsa:2822	6	30	0.00518528120980042	0.53	5.28461274191701	0.012	0.0385271430943675
784	784	hsa:2829	2	218	-0.0812816232805283	0.099	55.082643050731	0.008	0.00644763173959068
785	785	hsa:2833	3	945	-0.0564587040218218	0.03	176.713249608734	0.12	0.0238565571606723
786	786	hsa:2846	5	2284	-0.0353059993323034	0.04	277.567278696034	0.281	0.0616882271239665
787	787	hsa:2868	3	452	-0.0812730964001828	0.036	97.0130549299538	0.004	0.00141778040520791
788	788	hsa:2870	3	452	-0.0853340318437788	0.023	89.8086040386304	0.000999000999000999	0.000268394969405064
789	789	hsa:2872	3	1083	0.0378187053770904	0.932	137.050540138184	0.032	0.134579065450444
790	790	hsa:2877	4	822	-0.0289789775923418	0.171	90.7442073519869	0.333	0.220124811997272
791	791	hsa:2878	1	14	NA	1	2.61350536320953	0.062	0.234398495424097
792	792	hsa:2879	5	1078	-0.0069551776070897	0.423	144.267206168645	0.193	0.28618128478448
793	793	hsa:2882	8	2562	-0.00859987336451428	0.336	352.629499561018	0.512	0.474821183342124
794	794	hsa:2885	4	2047	-0.0221415240202721	0.122	365.93491621178	0.2	0.115001400379065
795	795	hsa:2889	3	833	-0.0122012068334677	0.354	142.709852273161	0.019	0.0403679364012565
796	796	hsa:2890	2	230	-0.0458255623482685	0.19	58.161926938199	0.003	0.00482782829236734
797	797	hsa:2891	5	2339	-0.0180884243243563	0.142	290.156086574799	0.193	0.125985198693821
798	798	hsa:2892	2	218	-0.0550316483461357	0.15	45.7442073519869	0.055	0.0478297221487432
799	799	hsa:2893	2	197	-0.0517899367687489	0.177	32.329579722869	0.066	0.0636634664658585
800	800	hsa:2902	1	24	NA	1	8.00232851089819	0.003	0.0204274289709421
801	801	hsa:2905	2	284	0.00050519646404876	0.499	42.7104630301179	0.039	0.0961245505437934
802	802	hsa:2909	3	867	-0.0409015601199126	0.089	151.45360155743	0.029	0.0179626717426321
803	803	hsa:2911	2	252	-0.0620852692914613	0.128	48.8336450738634	0.000999000999000999	0.0012741792344459
804	804	hsa:2912	2	138	-0.120958499480276	0.053	36.6653433599267	0.002	0.00107611957516834
805	805	hsa:2913	2	138	-0.116021417868836	0.063	25.4714280261099	0.02	0.00967257088310363
806	806	hsa:2914	2	133	-0.12376715001797	0.049	25.1655151353208	0.019	0.0074286829423198
807	807	hsa:2915	2	192	-0.00798854048861672	0.445	41.3853112951865	0.000999000999000999	0.00387582809228606
808	808	hsa:2918	2	133	-0.121605278401935	0.054	19.1894110012597	0.331	0.0898062710232739
809	809	hsa:2919	3	1011	-0.02554754695311	0.196	162.843608046723	0.000999000999000999	0.00186765784037673
810	810	hsa:2920	2	156	-0.0824646307502826	0.111	35.0131312745734	0.000999000999000999	0.00112075401011522
811	811	hsa:2921	2	82	-0.0643120449895422	0.243	12.2948429209451	0.000999000999000999	0.00226333467875575
812	812	hsa:2925	2	67	-0.141757989397473	0.083	11.6732068557468	0.025	0.0148939228099964
813	813	hsa:2931	5	2325	-0.0185061971637037	0.107	406.462953773333	0.377	0.169844799427897
814	814	hsa:2932	2	510	0.0382478271997399	0.826	77.7019506050311	0.096	0.280277071852582
815	815	hsa:2934	2	44	-0.263096802260047	0.02	6.77902049853037	0.435	0.0499765606038979
816	816	hsa:2936	6	2024	0.00805538915361625	0.664	302.506470206512	0.138	0.310630163848233
817	817	hsa:2937	3	116	-0.058222304886065	0.2	12.054433713784	0.489	0.325168442649866
818	818	hsa:2940	12	2656	-0.0148168001036612	0.211	347.291102034584	0.491	0.338486046745763
819	819	hsa:2941	4	1059	-0.010329639916033	0.386	162.979577814254	0.057	0.105975315498469
820	820	hsa:2947	8	2563	-0.013039207968183	0.229	417.341336794289	0.364	0.290465208950675
821	821	hsa:2949	2	103	-0.0766562535765238	0.172	18.2073519868687	0.002	0.00308735490180327
822	822	hsa:2950	2	103	-0.0695802917079216	0.183	16.2888880406153	0.349	0.239562082226679
823	823	hsa:2952	12	2656	-0.014188800681445	0.222	256.436576707257	0.507	0.358408197803656
824	824	hsa:2954	5	168	0.121620706983615	0.973	21.9613696224759	0.106	0.337435293170289
825	825	hsa:2977	4	1733	0.00452511863839326	0.55	295.132419742719	0.592	0.690951085964382
826	826	hsa:2978	3	297	-0.00945364845669358	0.433	35.2418597549338	0.401	0.477631636277233
827	827	hsa:2982	4	1733	0.00604977665996639	0.576	350.064854754361	0.38	0.551409422358656
828	828	hsa:2983	4	1733	0.00636871963183114	0.585	247.179066305302	0.607	0.722749681626255
829	829	hsa:2984	6	2486	-0.00704178237987103	0.306	319.734282551437	0.167	0.203075854850999
830	830	hsa:2986	6	2486	-0.00769376772038879	0.293	445.250181318472	0.233	0.2515234422502
831	831	hsa:2987	1	31	NA	1	5.02763675229988	0.111	0.355002983621348
832	832	hsa:2990	3	171	0.0044053900055935	0.545	22.2204069168225	0.136	0.266985419325116
833	833	hsa:2997	14	2691	-0.00096813231087414	0.475	313.608962858343	0.49	0.57205070694751
834	834	hsa:2998	6	2498	0.0055839637329561	0.62	469.692636561438	0.303	0.501972867431746
835	835	hsa:3000	2	259	0.0010872349686747	0.509	46.1880367981066	0.238	0.376847548442035
836	836	hsa:3001	3	391	-0.0205794322326251	0.292	84.6538916669848	0.000999000999000999	0.00266614268407642
837	837	hsa:3002	5	2095	-0.0211517555305327	0.127	381.792724357751	0.097	0.0664808693012954
838	838	hsa:3012	2	33	0.136211568782751	0.802	6.63484368439134	0.000999000999000999	0.006513266696549
839	839	hsa:3014	3	187	-0.00770927371127935	0.453	29.9533534374165	0.111	0.200633606527866
840	840	hsa:3017	2	33	0.148056053024729	0.818	5.98557086689315	0.000999000999000999	0.00662706477157462
841	841	hsa:3028	4	474	0.00535696130568163	0.547	64.6614497843264	0.295	0.455708701807307
842	842	hsa:3029	3	109	-0.055136467741147	0.276	17.9993510707333	0.079	0.105218730754565
843	843	hsa:3030	2	49	-0.0450090027009003	0.344	5.97179066305302	0.493	0.47050921474476
844	844	hsa:3033	5	1702	0.00245135124062191	0.564	193.556666793908	0.039	0.105952414948763
845	845	hsa:3034	1	4	NA	1	0.976524029469023	0.085	0.294533841911805
846	846	hsa:3052	10	39	0.104213648552841	0.786	5.37240905447188	0.168	0.399391032079133
847	847	hsa:3054	2	48	-0.221336336915687	0.043	7.51708210863839	0.459	0.097209861203132
848	848	hsa:3055	2	307	-0.0693019433597613	0.095	64.5216246135054	0.001	0.000974855198304556
849	849	hsa:3065	12	2669	-0.0220012612681794	0.132	380.712218956369	0.563	0.267495166101915
850	850	hsa:3066	12	2669	-0.020026652575647	0.147	480.075543001107	0.48	0.257635154155531
851	851	hsa:3067	1	4	NA	1	0.961102416307211	0.033	0.145571174678017
852	852	hsa:3071	3	653	-0.0219876331645885	0.261	151.224529526282	0.01	0.0181353372004601
853	853	hsa:3073	1	8	NA	1	1.50772989273581	0.058	0.223144111569272
854	854	hsa:3074	1	8	NA	1	1.8046341184105	0.007	0.0417329159094878
855	855	hsa:3075	4	480	-0.0430889276017415	0.122	79.3860365690728	0.013	0.0118102126870504
856	856	hsa:3082	3	968	0.0049317886218535	0.543	118.177081345192	0.134	0.263439291357535
857	857	hsa:3084	7	2547	-0.0133320686594512	0.236	477.987288620834	0.307	0.262626255999724
858	858	hsa:3087	6	2364	-0.00149663823730617	0.487	355.21113104554	0.102	0.19880893987923
859	859	hsa:3091	5	2499	-0.0201641220045097	0.117	338.841088674276	0.216	0.11822388722167
860	860	hsa:3092	3	53	-0.0467674471558751	0.316	10.0398518914379	0.018	0.0350915277839051
861	861	hsa:3098	1	31	NA	1	4.20048097110356	0.073	0.264062596161864
862	862	hsa:3099	1	31	NA	1	6.30957743253044	0.117	0.368033017269573
863	863	hsa:3101	5	2435	-0.00464278221317082	0.38	423.623010268351	0.247	0.315928157914285
864	864	hsa:3110	3	183	0.00687552225320521	0.549	29.3289307936023	0.015	0.0477577453729281
865	865	hsa:3145	6	332	0.0264995896454408	0.726	56.864297438638	0.204	0.430959024712826
866	866	hsa:3155	4	391	-0.0106904706013766	0.386	53.4931480703897	0.144	0.216213972065921
867	867	hsa:3157	13	2662	-0.00277004171438163	0.456	483.480322174295	0.452	0.531632012718922
868	868	hsa:3158	4	1350	-0.00530336450177405	0.451	222.436271328778	0.312	0.41665386479312
869	869	hsa:3162	2	106	-0.0415915765425308	0.305	19.9648051303584	0.163	0.198932016182048
870	870	hsa:3163	3	74	-0.0564867826612045	0.287	11.1618887658892	0.245	0.256985161807668
871	871	hsa:3164	3	943	0.0080153424195321	0.621	147.925678512807	0.059	0.157791057415031
872	872	hsa:3170	3	183	0.0195116172050418	0.616	29.9535061266557	0.001	0.00516963437416935
873	873	hsa:3172	5	2273	-0.00598344638411786	0.349	265.719242661373	0.233	0.285373894615644
874	874	hsa:3176	2	36	0.211288563682129	0.934	7.8046341184105	0.012	0.0615445566831708
875	875	hsa:3236	7	2529	-0.0121183265472669	0.27	429.500744360041	0.326	0.301925430973081
876	876	hsa:3242	3	168	0.110519721394787	0.953	20.6152994617704	0.081	0.274918739646528
877	877	hsa:3265	2	780	-0.0356755695750118	0.09	142.583158376913	0.049	0.0283293133997981
878	878	hsa:3269	2	67	-0.13429704258708	0.095	7.21120739015918	0.665	0.237654660579095
879	879	hsa:3274	3	364	-0.0118776474175712	0.37	74.6452265526587	0.001	0.00329374279436062
880	880	hsa:3276	2	66	-0.0241030600554043	0.438	12.0369889682025	0.122	0.209964503934137
881	881	hsa:3280	3	196	-0.12044158574567	0.026	21.2431576134672	0.051	0.0101115302014517
882	882	hsa:3283	1	24	NA	1	6.331755544528	0.015	0.0779955761681989
883	883	hsa:3284	2	223	0.0728415370869692	0.88	31.3141199373974	0.014	0.0664852658732017
884	884	hsa:3290	2	90	-0.0832557801151986	0.171	13.8999885483071	0.000999000999000999	0.00165274600580109
885	885	hsa:3291	2	26	-0.0734558619623596	0.361	4.83956178188342	0.24	0.298560892113714
886	886	hsa:3292	2	198	-0.0279171502275789	0.357	25.2560980264916	0.487	0.478027172637669
887	887	hsa:3293	3	270	0.00781209906284728	0.567	36.0444707409245	0.121	0.252429900137649
888	888	hsa:3294	1	13	NA	1	1.92846509142268	0.15	0.434567997732882
889	889	hsa:3295	6	2147	-0.00134086786032488	0.502	299.668206283162	0.053	0.123095812468712
890	890	hsa:3300	2	18	-0.198852919667101	0.17	4.01404741000878	0.029	0.0311202123142728
891	891	hsa:3301	6	2279	-0.0387216348545027	0.012	262.177119517502	0.845	0.0566954502275057
892	892	hsa:3303	5	2248	-0.0300987859118594	0.047	222.02160552735	0.359	0.0857492704999147
893	893	hsa:3305	5	2248	-0.0314759487017386	0.042	319.406153376341	0.535	0.107756552111877
894	894	hsa:3306	6	2489	-0.031174024569855	0.05	317.325189907241	0.581	0.131850303914626
895	895	hsa:3309	2	11	-0.165144564768954	0.322	2.58896056800397	0.011	0.0235297317657393
896	896	hsa:3326	5	2279	-0.0279449299709714	0.037	372.781234492499	0.726	0.124022999140364
897	897	hsa:3337	5	1868	-0.038887588668999	0.026	277.390884452418	0.155	0.0262513752791849
898	898	hsa:3339	2	112	0.0427169920298087	0.714	24.9435431537962	0.000999000999000999	0.00588149625026359
899	899	hsa:3351	2	133	-0.122145746305944	0.053	20.9937779135015	0.017	0.0072188167756207
900	900	hsa:3352	2	133	-0.12376715001797	0.049	20.3404206588541	0.058	0.0195053486825311
901	901	hsa:3354	2	133	-0.122145746305944	0.053	16.6880558842616	0.321	0.086320176969573
902	902	hsa:3356	3	553	-0.0137285033686051	0.341	114.539794632973	0.002	0.0056541079738824
903	903	hsa:3358	3	553	-0.0170873654407269	0.316	91.3954269572852	0.001	0.00286288679682325
904	904	hsa:3360	3	364	-0.0121105424649746	0.382	77.3322517845555	0.006	0.0162235334604571
905	905	hsa:3363	2	126	-0.0814259022173945	0.139	24.2455242966752	0.004	0.00472307669862482
906	906	hsa:3371	2	137	0.0638925626357194	0.806	24.1182196434706	0.000999000999000999	0.00654174586466267
907	907	hsa:3381	7	2552	-0.0224315345651704	0.151	305.452685421995	0.449	0.250260199897168
908	908	hsa:3385	3	390	-0.0653400686496686	0.047	68.8229568271176	0.001	0.000515372058943949
909	909	hsa:3394	3	381	0.00253532191174777	0.51	87.4475703324808	0.000999000999000999	0.00437249816145383
910	910	hsa:3397	4	1724	0.00619800437111039	0.635	252.266442722449	0.024	0.0790015955457482
911	911	hsa:3398	3	495	0.0339709323393878	0.821	82.0964232545711	0.053	0.179913006812702
912	912	hsa:3399	16	2694	-0.0111115543975231	0.293	438.021910905829	0.478	0.415361959573494
913	913	hsa:3400	1	4	NA	1	1.01553613009123	0.033	0.145571174678017
914	914	hsa:3417	2	10	-0.0608580619450185	0.484	1.83979081574226	0.1	0.194967564518562
915	915	hsa:3419	2	10	-0.365148371670111	0.137	1.90666870252319	0.36	0.197744870625833
916	916	hsa:3420	2	10	-0.365148371670111	0.127	2.36950795892659	0.048	0.0371863465198041
917	917	hsa:3421	2	10	-0.365148371670111	0.14	1.05214337519563	0.59	0.2885833864324
918	918	hsa:3422	3	95	-0.0450727075724675	0.3	11.6793525976257	0.053	0.0817488350991196
919	919	hsa:3423	3	47	-0.213710076571821	0.073	5.68565102874375	0.791	0.222411782085492
920	920	hsa:3425	2	7	-0.552052447473883	0.1	1.36175898003588	0.059	0.0361835372756157
921	921	hsa:3426	4	480	-0.0452976786222729	0.112	68.3238920487079	0.003	0.00302346219772836
922	922	hsa:3440	5	2233	-0.0391994886233115	0.048	315.002595717067	0.217	0.0579589174076619
923	923	hsa:3442	2	145	-0.0323252530299875	0.345	23.7492460968813	0.047	0.0830502876134986
924	924	hsa:3452	5	2233	-0.03884433927258	0.049	401.918769324732	0.349	0.0866784421921735
925	925	hsa:3454	6	2528	-0.0160793409665768	0.202	446.992327365729	0.287	0.223070075621835
926	926	hsa:3455	2	223	-0.0478094045372634	0.228	38.2890789021644	0.184	0.174991406198608
927	927	hsa:3456	5	2251	-0.0382120969869016	0.043	381.558804443257	0.321	0.072919445212099
928	928	hsa:3458	1	36	NA	1	6.05363209527808	0.014	0.0737617712911363
929	929	hsa:3467	5	2189	-0.0300181292339808	0.094	328.341642172768	0.171	0.0824684963712859
930	930	hsa:3479	4	2054	-0.0279562396096374	0.091	301.886742756804	0.096	0.0501472857847817
931	931	hsa:3480	14	2689	-0.0131180099120827	0.271	339.903614917739	0.46	0.384222719765995
932	932	hsa:3486	5	2211	-0.0292740255732982	0.061	252.792418979272	0.247	0.0782768069973747
933	933	hsa:3516	1	16	NA	1	2.79016681299385	0.021	0.102127889666433
934	934	hsa:3551	3	1352	-0.0494476116297235	0.021	220.586593884796	0.079	0.0122791553042368
935	935	hsa:3552	4	2022	-0.0282953886079262	0.065	301.697904340192	0.416	0.124666244271911
936	936	hsa:3553	2	316	-0.0563937121954876	0.118	62.0138947207695	0.072	0.0490062857838438
937	937	hsa:3554	2	193	-0.0676763692029245	0.14	23.0041607817689	0.038	0.0331770201103441
938	938	hsa:3556	5	2138	-0.034656527342112	0.061	262.236477459251	0.237	0.0757051872217454
939	939	hsa:3558	5	2243	-0.0236046802755929	0.125	466.297209604153	0.175	0.105490237272404
940	940	hsa:3559	2	291	-0.0255510482880993	0.326	62.8625033400771	0.002	0.00543472382941653
941	941	hsa:3560	3	1148	-0.0343445412871082	0.116	262.469557582929	0.000999000999000999	0.00116613257202214
942	942	hsa:3561	3	1154	-0.0332552739127888	0.125	260.852731228767	0.000999000999000999	0.00124727726286152
943	943	hsa:3562	4	1567	-0.0295827264383545	0.143	315.425239531244	0.014	0.0144416444133744
944	944	hsa:3566	3	905	-0.0465370343945365	0.077	206.318242546856	0.000999000999000999	0.000805592664341822
945	945	hsa:3567	6	2458	-0.0332441144366444	0.064	382.285834255831	0.423	0.124781759361355
946	946	hsa:3569	2	417	-0.0626695968129904	0.097	76.0179791579188	0.002	0.00185224456538679
947	947	hsa:3570	3	984	-0.0408011240247518	0.08	157.979196091155	0.001	0.000834678713863232
948	948	hsa:3572	3	898	-0.050579266605216	0.06	145.709699583922	0.438	0.121911529403411
949	949	hsa:3574	3	606	-0.0492173854199391	0.085	110.103103408787	0.000999000999000999	0.000880897101052547
950	950	hsa:3576	2	387	-0.0236467962568188	0.312	50.5892277741726	0.000999000999000999	0.00282810603755466
951	951	hsa:3577	2	219	-0.0924028380411638	0.075	45.7466885521243	0.000999000999000999	0.000786640005851228
952	952	hsa:3579	3	946	-0.0646785561897818	0.016	184.80665725083	0.146	0.0164905603399417
953	953	hsa:3586	3	933	-0.0357447790993758	0.098	162.84017253884	0.093	0.051931057844084
954	954	hsa:3587	3	898	-0.0499700329248411	0.058	212.775432301409	0.000999000999000999	0.000623228660109445
955	955	hsa:3588	3	898	-0.0519693490871984	0.053	132.615184944841	0.025	0.0101049042358957
956	956	hsa:3589	6	2458	-0.0327681708997599	0.064	489.533954269573	0.335	0.103823134453193
957	957	hsa:3590	2	181	-0.0361695368490717	0.321	26.7599343436271	0.078	0.117362134906726
958	958	hsa:3592	4	2063	-0.0347263385542181	0.045	224.111844867733	0.558	0.117627521446956
959	959	hsa:3594	1	39	NA	1	7.64373783257625	0.018	0.0903129033795475
960	960	hsa:3595	3	906	-0.0433439849104626	0.093	145.156315608657	0.001	0.000956310729027426
961	961	hsa:3596	5	2189	-0.0291516298370317	0.098	491.478184524946	0.14	0.07256371700971
962	962	hsa:3597	3	898	-0.0542260879314043	0.046	153.30182845364	0.405	0.0928329564180878
963	963	hsa:3598	1	35	NA	1	8.37347787914647	0.012	0.0650741835503296
964	964	hsa:3600	3	498	-0.037050439044533	0.161	103.372065503684	0.000999000999000999	0.00156578623039298
965	965	hsa:3601	3	898	-0.054457768345068	0.045	178.182463640875	0.000999000999000999	0.000494948192391326
966	966	hsa:3605	1	2	NA	1	0.508989578959423	0.017	0.0862672128937407
967	967	hsa:3606	2	267	0.00142663952860599	0.478	46.8178035652937	0.000999000999000999	0.00412908878894628
968	968	hsa:3612	2	140	-0.0261974694333672	0.368	19.1748673512234	0.011	0.0263505869406437
969	969	hsa:3613	3	766	-0.0680634445030789	0.017	135.061419246479	0.469	0.0464960998136668
970	970	hsa:3614	3	268	-0.0574615498550484	0.129	36.2147574149712	0.967	0.384395511856519
971	971	hsa:3615	1	13	NA	1	2.69778982326221	0.019	0.0943030096964982
972	972	hsa:3620	2	139	-0.0573160631276299	0.216	25.8591823491239	0.005	0.00845725777687369
973	973	hsa:3624	3	265	0.00409612836317525	0.544	39.0656945451769	0.011	0.0366140975732468
974	974	hsa:3625	6	2374	-0.0161534463485533	0.17	253.466274764286	0.335	0.220144871498616
975	975	hsa:3626	6	2374	-0.01450534333243	0.202	464.584685269306	0.385	0.276394543158429
976	976	hsa:3627	3	652	-0.054844648617163	0.056	100.947284040157	0.002	0.00113086530890695
977	977	hsa:3628	3	761	-0.0710291905983225	0.011	101.131923502691	0.026	0.00261962236168331
978	978	hsa:3630	4	2123	-0.0143370824438122	0.22	381.830591289079	0.153	0.147816041736788
979	979	hsa:3631	4	1840	-0.046977337890959	0.013	274.131999847311	0.446	0.0356591045567025
980	980	hsa:3632	3	810	-0.0720459888318929	0.009	101.653968011604	0.056	0.00433083888210602
981	981	hsa:3633	4	1945	-0.0422653926636385	0.021	328.137534832233	0.455	0.053992349650825
982	982	hsa:3635	4	1812	-0.0536263643093622	0.008	341.991067679505	0.07	0.00475304131357165
983	983	hsa:3636	4	1812	-0.0553881272381714	0.005	313.665228842997	0.644	0.0216975640205511
984	984	hsa:3643	6	2536	-0.0208030661665595	0.16	316.099973279383	0.405	0.242121938980429
985	985	hsa:3645	5	2268	-0.0282752675272853	0.094	437.108333015231	0.385	0.156303612654501
986	986	hsa:3651	2	183	0.0182581505211202	0.619	43.2698782303317	0.007	0.0279109984252602
987	987	hsa:3659	2	132	-0.0832575909048348	0.143	28.5790739397641	0.002	0.00261962236168331
988	988	hsa:3661	4	1712	-0.0367567212414058	0.047	242.457991373058	0.031	0.0109732144703275
989	989	hsa:3663	5	2171	-0.0440651645018183	0.045	485.346184677635	0.169	0.0447094098316251
990	990	hsa:3665	4	1669	-0.0206059983753804	0.198	247.946100698553	0.002	0.00349830215329708
991	991	hsa:3667	4	2097	-0.0264168556307403	0.09	336.283276711074	0.211	0.0942633739014593
992	992	hsa:3672	3	1049	-0.0137527000290688	0.292	179.693438179944	0.017	0.0313007174953799
993	993	hsa:3673	5	2358	-0.0330006140054054	0.061	383.271672328893	0.451	0.126362682105825
994	994	hsa:3674	3	1104	-0.0170596018543811	0.264	181.295720884071	0.000999000999000999	0.00243707102113874
995	995	hsa:3676	3	1121	-0.0189178524852068	0.25	220.2109783563	0.035	0.0502136388128604
996	996	hsa:3678	3	1126	-0.0143557595843668	0.28	210.568500209948	0.003	0.00678897127954661
997	997	hsa:3679	5	2294	-0.0266979709636288	0.086	260.005229606443	0.86	0.266568915327379
998	998	hsa:3680	5	2296	-0.030459017277249	0.073	376.825132648777	0.403	0.133153764089697
999	999	hsa:3682	3	921	0.00729874296025632	0.555	121.812344924991	0.059	0.14470031873522
1000	1000	hsa:3683	3	1043	-0.0154276134419927	0.323	229.113562621674	0.000999000999000999	0.00291663441401512
1001	1001	hsa:3684	2	347	-0.0515975439917684	0.108	79.5414360422949	0.000999000999000999	0.00109341949427243
1002	1002	hsa:3685	1	61	NA	1	11.3252280795511	0.000999000999000999	0.00790085392538984
1003	1003	hsa:3688	2	517	0.00677493552460794	0.552	75.0692827422987	0.001	0.00469308330645133
1004	1004	hsa:3690	3	1376	-0.0249156410081339	0.161	235.571057754705	0.17	0.125855683279792
1005	1005	hsa:3691	1	56	NA	1	8.34484864679162	0.023	0.109762004450219
1006	1006	hsa:3693	1	56	NA	1	13.3055693400008	0.000999000999000999	0.00790085392538984
1007	1007	hsa:3694	4	2066	-0.0246292434375497	0.109	313.899912203687	0.756	0.288094379568579
1008	1008	hsa:3695	3	1275	-0.0169715848488584	0.264	240.049165935031	0.041	0.0598133091369422
1009	1009	hsa:3696	4	2066	-0.02536194561696	0.106	335.751841813948	0.106	0.0616702733064002
1010	1010	hsa:3702	2	247	-0.0443538010709562	0.222	53.2294919265565	0.000999000999000999	0.00208778307109528
1011	1011	hsa:3703	2	13	0.0965609099170535	0.692	2.78531892964843	0.006	0.0269222536327082
1012	1012	hsa:3704	3	699	-0.0328267052714265	0.175	126.553269458335	0.272	0.192538311844651
1013	1013	hsa:3705	4	911	-0.0593371456687213	0.01	99.8321945260908	0.085	0.00685973307720792
1014	1014	hsa:3706	3	910	-0.0565690385338117	0.013	156.108905599878	0.209	0.0187696526191775
1015	1015	hsa:3707	3	910	-0.0548144316019491	0.018	124.231095163568	0.311	0.0346255662804019
1016	1016	hsa:3708	16	2694	-0.00352650238285566	0.442	378.499790052296	0.448	0.518684584326471
1017	1017	hsa:3709	3	1288	-0.00155967948762789	0.466	200.47337481391	0.167	0.276527333753073
1018	1018	hsa:3710	3	1294	0.000485426288471331	0.5	157.43001106997	0.111	0.215971160331751
1019	1019	hsa:3712	7	2482	3.54629968774901e-05	0.5	299.501660495477	0.453	0.562854840664375
1020	1020	hsa:3716	2	393	-0.0791150951972562	0.034	69.7428331488338	0.088	0.0203809451508588
1021	1021	hsa:3717	3	1239	-0.0471916302982654	0.052	260.425735771271	0.004	0.0019714182754787
1022	1022	hsa:3718	5	2387	-0.0398841563818608	0.041	449.023094247433	0.388	0.0817819645762365
1023	1023	hsa:3725	2	486	0.0344785179621163	0.806	59.8378440279421	0.003	0.0169860015257771
1024	1024	hsa:3726	3	899	0.0184216917035708	0.751	133.3016757644	0.001	0.00615377278455631
1025	1025	hsa:3728	3	743	0.00307012849741391	0.564	109.702904912776	0.221	0.384189404095196
1026	1026	hsa:3732	2	49	-0.168358757425368	0.125	7.35397182883536	0.16	0.0982404601085629
1027	1027	hsa:3745	2	133	0.0194568445443096	0.613	23.1610871473833	0.049	0.135326456754508
1028	1028	hsa:3758	6	2385	-0.0262406779826844	0.057	478.168721609345	0.268	0.0791521710017378
1029	1029	hsa:3759	4	1213	-0.0186951324034103	0.215	182.038324999046	0.213	0.187007562775204
1030	1030	hsa:3760	2	227	-0.063744625886518	0.135	44.187578730389	0.014	0.013742527270331
1031	1031	hsa:3761	4	1213	-0.0195869946943499	0.204	170.258693743558	0.099	0.0990062593396505
1032	1032	hsa:3762	2	222	-0.0911932355118951	0.06	45.8885368553651	0.01	0.00505114854164888
1033	1033	hsa:3763	2	222	-0.0927501931913665	0.057	55.4176050692827	0.011	0.00525085163886676
1034	1034	hsa:3778	5	2307	0.000339942328496297	0.517	272.544947894797	0.229	0.371013552280591
1035	1035	hsa:3779	1	3	NA	1	0.905714394778028	0.051	0.202772411959148
1036	1036	hsa:3784	2	187	0.0110449574521694	0.562	27.0045043325572	0.069	0.164802707646289
1037	1037	hsa:3791	4	2051	-0.0203493366864537	0.145	318.778066190785	0.38	0.214813166511562
1038	1038	hsa:3795	6	2440	-0.000875884484783997	0.478	339.334885673932	0.23	0.352667787589466
1039	1039	hsa:3798	1	2	NA	1	0.67148910180555	0.081	0.284577796069086
1040	1040	hsa:3799	1	2	NA	1	0.833301523075161	0.012	0.0650741835503296
1041	1041	hsa:3815	5	2422	-0.0291915244271701	0.073	423.850364545559	0.299	0.105306708850342
1042	1042	hsa:3816	3	140	0.00350147638888928	0.557	40.6918349429324	0.000999000999000999	0.00472640086296917
1043	1043	hsa:3817	3	140	-0.0688623689814891	0.182	29.4941787227545	0.000999000999000999	0.00174772788567647
1044	1044	hsa:3818	4	576	-0.00918737543982715	0.387	127.413215253655	0.013	0.0316557387690964
1045	1045	hsa:3824	3	522	-0.0847073618752479	0.041	99.2323548497919	0.000999000999000999	0.000454765691963352
1046	1046	hsa:3827	3	158	-0.000926131596983006	0.482	31.302172004428	0.001	0.0041633070259664
1047	1047	hsa:3845	2	786	-0.0361863196461681	0.086	111.0926441959	0.675	0.22328645563716
1048	1048	hsa:3897	8	2470	-0.020688411493766	0.14	293.387563461465	0.34	0.192538311844651
1049	1049	hsa:3906	5	1952	0.0345469427249012	0.955	373.787227545139	0.091	0.299208675581561
1050	1050	hsa:3908	3	786	-0.0197088429464647	0.287	107.893728289499	0.017	0.0308490143759662
1051	1051	hsa:3909	6	2456	-0.02136457145029	0.151	260.788639920602	0.396	0.228230360025674
1052	1052	hsa:3910	2	148	0.049570719923595	0.749	34.957399702256	0.000999000999000999	0.00613399653847186
1053	1053	hsa:3911	5	2254	-0.0250264519330289	0.107	357.330648547544	0.194	0.101191587550626
1054	1054	hsa:3912	3	786	-0.0207951116283572	0.287	134.560942092606	0.000999000999000999	0.00262544154925907
1055	1055	hsa:3914	2	148	0.0525412499564696	0.765	20.7550864602817	0.01	0.0449288296782493
1056	1056	hsa:3918	2	148	0.0536551987187976	0.772	19.6439668664351	0.034	0.121795063606271
1057	1057	hsa:3920	1	1	NA	1	0.2337672252548	0.168	0.467676938329252
1058	1058	hsa:3925	10	2649	-0.0153494232663346	0.223	549.503149215559	0.407	0.308544343077948
1059	1059	hsa:3931	7	2550	-0.0153081035375075	0.197	527.303011795244	0.395	0.276509460120463
1060	1060	hsa:3937	2	305	-0.0525035395505026	0.16	78.405122723976	0.000999000999000999	0.00155705674214802
1061	1061	hsa:3938	1	9	NA	1	2.3795854487155	0.095	0.318618446801252
1062	1062	hsa:3948	6	2459	-0.00524356901685484	0.356	385.005344123373	0.229	0.285893077207743
1063	1063	hsa:3952	6	2458	-0.0322721102419174	0.064	427.832957972287	0.56	0.155140274360975
1064	1064	hsa:3955	2	18	-0.228664780190012	0.175	3.56395770508073	0.478	0.291195173682099
1065	1065	hsa:3973	2	213	-0.123632882504973	0.027	22.59961064244	0.114	0.0208795367996944
1066	1066	hsa:3976	4	1491	-0.0327925765964233	0.115	247.853761881131	0.02	0.0162721461589082
1067	1067	hsa:3977	3	898	-0.0531191703994554	0.047	111.593884795969	0.055	0.0179865069580912
1068	1068	hsa:3983	4	1553	0.000367733822961343	0.479	232.071954803985	0.005	0.0168473210552456
1069	1069	hsa:3984	7	2533	-0.0240296668576944	0.087	272.528724663129	0.479	0.174105703457448
1070	1070	hsa:3988	7	2067	-0.00415214982060787	0.419	320.160934458144	0.082	0.150176082786346
1071	1071	hsa:3990	15	2691	-0.0183756769900611	0.166	351.471695232278	0.543	0.307047295526697
1072	1072	hsa:3991	2	137	-0.0460224105478521	0.275	33.8032599152575	0.035	0.0543176422135298
1073	1073	hsa:3996	7	2562	-0.0238981201796831	0.105	488.443256861473	0.371	0.165377536996239
1074	1074	hsa:4008	4	1113	-0.0195981505385292	0.217	114.331488338359	0.019	0.0267631113307361
1075	1075	hsa:4023	4	1574	-0.0143484065478702	0.27	262.176890483643	0.074	0.0981622096451194
1076	1076	hsa:4035	2	27	-0.150970271219279	0.22	7.35801809367485	0.052	0.0625841135122688
1077	1077	hsa:4036	2	12	-0.185567404756301	0.343	1.68836126274001	0.112	0.163624548096756
1078	1078	hsa:4046	4	1641	-0.0317165133585679	0.061	339.516013283964	0.044	0.0185744799086983
1079	1079	hsa:4047	2	8	-0.327326835353989	0.209	1.01721571172272	0.2	0.17450910366907
1080	1080	hsa:4048	4	742	-0.0388966918025925	0.111	99.773561858228	0.815	0.307833600300183
1081	1081	hsa:4049	2	27	-0.356149633756895	0.019	6.29766767187082	0.405	0.0451479848174645
1082	1082	hsa:4050	4	946	-0.0326307811033849	0.112	163.368324617323	0.000999000999000999	0.00112984740553871
1083	1083	hsa:4052	4	1400	0.00348089249472187	0.553	230.263236248425	0.022	0.0658072335141154
1084	1084	hsa:4055	2	144	-0.111997070884142	0.036	24.6592357903577	0.146	0.0328415115484359
1085	1085	hsa:4060	2	48	0.192194001672684	0.958	9.01400923769897	0.028	0.123885524629604
1086	1086	hsa:4066	4	669	-0.0144815552911289	0.349	137.570332480818	0.593	0.532964821507992
1087	1087	hsa:4067	2	410	-0.0935306642976652	0.036	75.7625682330038	0.000999000999000999	0.000403983696617667
1088	1088	hsa:4082	5	2215	-0.039195060962655	0.008	392.371034851319	0.237	0.0137801448272831
1089	1089	hsa:4085	3	97	-0.118698909947288	0.092	22.3005687674161	0.000999000999000999	0.000946168208066779
1090	1090	hsa:4086	1	14	NA	1	2.6180478680765	0.001	0.00790775527898214
1091	1091	hsa:4087	1	29	NA	1	4.50906592357904	0.155	0.443971175119748
1092	1092	hsa:4088	2	368	-0.00400808740786018	0.499	59.9480856586632	0.136	0.250435097258015
1093	1093	hsa:4089	15	2694	-0.0136905580466313	0.237	417.443447723022	0.503	0.372756136872859
1094	1094	hsa:4090	10	2649	-0.011694646769841	0.289	292.745657899759	0.471	0.407571018380942
1095	1095	hsa:4091	5	2215	-0.0102858260160662	0.283	262.948620071	0.143	0.170261946927544
1096	1096	hsa:4092	4	1703	0.00942154381386698	0.673	263.116998129557	0.01	0.0403879423107406
1097	1097	hsa:4093	3	1085	0.0625908207135511	0.993	129.795129213269	0.027	0.123838481521423
1098	1098	hsa:4094	2	31	NA	1	8.20284765431156	0.002	0.0144292161968444
1099	1099	hsa:4116	5	65	-0.00900833476376804	0.457	12.4244379127381	0.011	0.0316345686325038
1100	1100	hsa:4121	2	6	0	0.612	2.22804137878383	0.013	0.0464139428715317
1101	1101	hsa:4124	2	8	0.218217890235992	0.792	2.21437569187311	0.033	0.121387125780005
1102	1102	hsa:4128	2	132	-0.107926803611778	0.069	25.4728022292629	0.005	0.00309532831862186
1103	1103	hsa:4129	2	132	-0.107926803611778	0.067	18.8298278428828	0.035	0.0165450768617617
1104	1104	hsa:4137	4	1970	0.0010728370816891	0.517	409.970034736802	0.238	0.380851611265928
1105	1105	hsa:4141	4	302	0.0746113678765866	0.946	50.4463869908768	0.004	0.0248872682075668
1106	1106	hsa:4143	7	2518	-0.00845282635161712	0.287	528.056571363133	0.322	0.31249579668656
1107	1107	hsa:4144	2	40	-0.153129923427048	0.126	5.98301332213612	0.42	0.208450500890796
1108	1108	hsa:4145	1	3	NA	1	1.13883269076612	0.000999000999000999	0.00790085392538984
1109	1109	hsa:4149	11	2655	-0.0227759565906067	0.12	454.935832347215	0.406	0.195935550739882
1110	1110	hsa:4153	7	1561	-0.0276968009513074	0.163	277.300454250487	0.009	0.0110384939889978
1111	1111	hsa:4157	2	57	0.22813086040821	0.991	13.7400083979082	0.025	0.11639097292443
1112	1112	hsa:4170	4	1679	0.0152393299684988	0.755	264.196396533954	0.044	0.146320917466756
1113	1113	hsa:4171	4	46	-0.423340357322094	0.000999000999000999	14.361339084628	0.000999000999000999	1.47879189328458e-05
1114	1114	hsa:4172	4	46	-0.438828419175341	0.000999000999000999	15.0297362293392	0.000999000999000999	1.47879189328458e-05
1115	1115	hsa:4173	4	46	-0.431084388248717	0.000999000999000999	13.5145627361912	0.000999000999000999	1.47879189328458e-05
1116	1116	hsa:4174	4	46	-0.456897824670796	0.000999000999000999	10.3027064167653	0.000999000999000999	1.47879189328458e-05
1117	1117	hsa:4175	4	46	-0.420759013679886	0.000999000999000999	14.0926060235905	0.000999000999000999	1.47879189328458e-05
1118	1118	hsa:4179	5	1529	-0.0287107459061476	0.165	227.535519334275	0.114	0.0935490264169376
1119	1119	hsa:4190	3	338	0.0184618674797071	0.662	59.6511432606787	0.034	0.107900751817569
1120	1120	hsa:4193	5	2386	-0.0198953539957339	0.111	285.581211589113	0.257	0.129994808160404
1121	1121	hsa:4194	5	2283	-0.0314869030093992	0.038	260.456502652975	0.526	0.0981935122317776
1122	1122	hsa:4199	4	1570	-0.0143149124916926	0.284	237.41813948162	0.17	0.194604024979306
1123	1123	hsa:4200	4	1242	-0.00430758244342816	0.4	162.986792380807	0.162	0.242121938980429
1124	1124	hsa:4208	4	1954	-0.00730540485971467	0.357	447.391953277093	0.279	0.329343593927565
1125	1125	hsa:4216	5	2395	-0.037253771861213	0.012	392.304538687636	0.492	0.0362040671317021
1126	1126	hsa:4217	5	2336	-0.040513290104244	0.023	463.567278696034	0.261	0.0367113220960787
1127	1127	hsa:4233	1	67	NA	1	9.49685078444097	0.037	0.158982982554503
1128	1128	hsa:4242	5	1737	0.00896952653527815	0.663	400.682215520861	0.093	0.233449364225313
1129	1129	hsa:4245	1	4	NA	1	0.996297285948773	0.005	0.0314915868327402
1130	1130	hsa:4247	4	47	-0.144875538756912	0.09	6.82936977516509	0.657	0.226350637472804
1131	1131	hsa:4254	3	955	0.00813242926601514	0.604	158.599076230103	0.181	0.351306041177755
1132	1132	hsa:4258	8	2563	-0.0119248185952996	0.255	330.459365576211	0.483	0.381100882185113
1133	1133	hsa:4259	2	103	-0.0689906282188714	0.186	16.1921594075658	0.162	0.135659312587031
1134	1134	hsa:4282	3	167	0.143151432824211	0.99	28.4805512081536	0.001	0.00783862755868729
1135	1135	hsa:4283	2	116	-0.0758208828037127	0.159	23.2374317669962	0.001	0.0015497104105633
1136	1136	hsa:4286	4	2120	0.00511201673580983	0.6	387.825819750353	0.22	0.399293843044241
1137	1137	hsa:4292	6	242	-0.110112690712401	0.032	37.7221819292285	0.764	0.11517958545992
1138	1138	hsa:4296	3	1044	-0.0133837082301319	0.316	184.439668664351	0.085	0.124015764980646
1139	1139	hsa:4312	2	164	-0.0563144458578034	0.215	19.1403595831584	0.373	0.282550571166911
1140	1140	hsa:4313	1	13	NA	1	3.18311257014162	0.01	0.0560517018598809
1141	1141	hsa:4316	2	25	0.0251976315339485	0.575	3.35389548421575	0.09	0.204998871323797
1142	1142	hsa:4318	2	367	-0.0307150559872165	0.249	67.0802381952132	0.002	0.00428524541950794
1143	1143	hsa:4323	3	952	-0.00240641642041669	0.463	160.251402832385	0.05	0.110327355539115
1144	1144	hsa:4325	4	322	-0.0591082919550147	0.093	37.1642554490972	0.534	0.198772911146204
1145	1145	hsa:4329	3	296	-0.0395230845897951	0.198	40.1115013169447	0.457	0.307884056500077
1146	1146	hsa:4337	3	9	-0.408248290463863	0.09	0.968660533648891	0.704	0.238165331594317
1147	1147	hsa:4342	3	912	-0.0101974414041138	0.323	164.930526396152	0.107	0.150859781103067
1148	1148	hsa:4351	2	52	0.123928990213592	0.859	9.62881245944192	0.027	0.110489243330046
1149	1149	hsa:4357	7	2561	-0.0153292267608798	0.172	372.641714700156	0.341	0.224996908134025
1150	1150	hsa:4363	3	217	-0.0682156842470941	0.114	31.0779860289346	0.798	0.309050397904578
1151	1151	hsa:4440	9	2303	-0.0280829376176906	0.045	275.744741764324	0.475	0.103573273521405
1152	1152	hsa:4478	3	693	-0.030502333087132	0.16	140.157613467191	0.000999000999000999	0.00155705674214802
1153	1153	hsa:4507	9	2534	-0.0111624105200498	0.247	356.357865404436	0.428	0.343259749006663
1154	1154	hsa:4524	8	2535	0.000281410823412964	0.496	429.640684047792	0.24	0.372392321068101
1155	1155	hsa:4534	4	1974	-0.035910546423396	0.038	325.692903767607	0.182	0.0413156148903901
1156	1156	hsa:4544	2	169	-0.111764632352919	0.038	27.8255525441844	0.051	0.0140429394075653
1157	1157	hsa:4548	7	2489	4.90941513086125e-05	0.484	448.155170439363	0.437	0.540084082415808
1158	1158	hsa:4594	2	21	0	0.546	3.55189525518189	0.119	0.242597847821693
1159	1159	hsa:4597	4	817	-0.0508758781582855	0.035	178.760735962133	0.126	0.0283293133997981
1160	1160	hsa:4598	6	1580	-0.0229575144709397	0.181	381.489865251746	0.174	0.140398936416379
1161	1161	hsa:4602	15	2694	-0.018724581342152	0.182	303.220674122991	0.519	0.317341095640206
1162	1162	hsa:4607	4	885	-0.0488174770748152	0.041	156.622514028324	0.47	0.0953711956996314
1163	1163	hsa:4609	15	2694	-0.0130708143802138	0.264	282.211169217849	0.522	0.410928830014623
1164	1164	hsa:4615	3	1007	-0.0202553409430656	0.26	178.191090582891	0.000999000999000999	0.00240411127981346
1165	1165	hsa:4616	2	214	-0.131543428013587	0.027	39.6716799633546	0.009	0.00226535513485357
1166	1166	hsa:4620	5	2193	-0.0220376688074024	0.123	435.218460129022	0.149	0.0916236353658385
1167	1167	hsa:4621	5	2193	-0.0228350329276895	0.119	460.238958659388	0.266	0.140951803992673
1168	1168	hsa:4624	3	885	-0.0567944616006926	0.024	129.387029049128	0.259	0.0377971877873388
1169	1169	hsa:4625	5	2195	-0.0260907809021057	0.083	324.269458334924	0.275	0.109101191308338
1170	1170	hsa:4626	5	2193	-0.0225500434702485	0.117	405.095430774516	0.184	0.104161093833723
1171	1171	hsa:4627	3	696	-0.0438236877194449	0.075	104.475474290949	0.000999000999000999	0.000786640005851228
1172	1172	hsa:4628	4	1590	-0.0117426889438746	0.281	288.124060006871	0.025	0.0418569174479304
1173	1173	hsa:4629	1	3	NA	1	1.24976142306371	0.001	0.00790775527898214
1174	1174	hsa:4635	5	1349	-0.0267494890763531	0.101	262.260029774402	0.298	0.135540219700881
1175	1175	hsa:4636	3	830	-0.0352234029095441	0.101	109.874222239188	0.157	0.0815706951466795
1176	1176	hsa:4637	3	645	-0.0170243145190664	0.276	73.9260984082147	0.174	0.193827476170997
1177	1177	hsa:4638	1	19	NA	1	3.48326144214986	0.098	0.325633204430533
1178	1178	hsa:4660	5	2117	-0.0200868457117586	0.108	371.813451921976	0.564	0.23136357723288
1179	1179	hsa:4668	1	3	NA	1	0.623888231476887	0.134	0.403328674190184
1180	1180	hsa:4669	5	19	-0.574642867310878	0.000999000999000999	2.59086918349429	0.542	0.00461390037843845
1181	1181	hsa:4684	4	884	0.0507885286216457	0.963	127.412031912051	0.001	0.007651475231758
1182	1182	hsa:4685	7	2470	-0.0201177048390147	0.151	328.621559720579	0.359	0.212223265805224
1183	1183	hsa:4686	18	2694	-0.0174142646069094	0.151	347.69427797076	0.495	0.268609085289111
1184	1184	hsa:4688	3	1314	0.000774154453255131	0.493	269.828148261251	0.002	0.00781094824451458
1185	1185	hsa:4689	3	1314	0.00232652716266962	0.507	280.75344505096	0.047	0.112874445180007
1186	1186	hsa:4690	7	2556	-0.0234538916906754	0.142	297.37279077757	0.442	0.23651820177806
1187	1187	hsa:4734	3	941	-0.0121919891267423	0.32	149.840477917319	0.048	0.0795031841473937
1188	1188	hsa:4741	5	2267	-0.0260205036201673	0.087	226.970569149139	0.326	0.129407440853379
1189	1189	hsa:4744	5	2267	-0.0259436223787354	0.089	253.480627552773	0.271	0.113956374705173
1190	1190	hsa:4747	5	2281	-0.0284442829532293	0.064	347.385044089018	0.325	0.101354287679317
1191	1191	hsa:4758	2	25	-0.0577350269189626	0.369	4.23663014849028	0.000999000999000999	0.00328292532453624
1192	1192	hsa:4760	1	3	NA	1	1.08966675573539	0.02	0.0982404601085629
1193	1193	hsa:4763	3	786	-0.0448044628253657	0.043	127.035805626598	0.699	0.135396556604009
1194	1194	hsa:4771	6	2244	-0.0217070903972633	0.109	297.784250104974	0.46	0.200205820378675
1195	1195	hsa:4772	2	278	0.00417174559278854	0.547	52.1238309730122	0.001	0.00465555078028164
1196	1196	hsa:4775	9	2633	-0.0275844655348236	0.061	381.891361606291	0.462	0.128765581543951
1197	1197	hsa:4776	5	2279	-0.0445728222684391	0.009	467.854296293469	0.353	0.0214505255435783
1198	1198	hsa:4780	6	2367	-0.0214489966206456	0.09	290.565141046685	0.127	0.062539402747435
1199	1199	hsa:4790	2	678	0.00259207740587784	0.536	140.93487803947	0.000999000999000999	0.00456878469621722
1200	1200	hsa:4791	2	277	-0.133567357172515	0.005	45.0627552773218	0.000999000999000999	6.59693913379782e-05
1201	1201	hsa:4792	3	1200	-0.00989749967161162	0.343	181.233767225255	0.000999000999000999	0.00307664476185622
1202	1202	hsa:4793	5	2313	-0.0356546599096607	0.027	309.620796274383	0.3	0.0471087188601603
1203	1203	hsa:4794	2	151	-0.0178405933961969	0.403	22.960949727068	0.000999000999000999	0.00354993218684248
1204	1204	hsa:4800	1	1	NA	1	0.404282933160285	0.074	0.26667307374757
1205	1205	hsa:4801	6	2321	-0.0105667900456151	0.269	335.061953658816	0.502	0.405410956484775
1206	1206	hsa:4802	4	746	0.0094678237463939	0.617	101.42791159293	0.15	0.312819577508542
1207	1207	hsa:4803	5	2272	-0.00927625867489097	0.309	439.945337252357	0.299	0.312441019857879
1208	1208	hsa:4804	5	2340	-0.0235875692596388	0.133	350.516853074779	0.562	0.268611678955381
1209	1209	hsa:4809	14	2373	-0.0264533641271912	0.05	318.594037485208	0.546	0.1256037121464
1210	1210	hsa:4832	3	607	-0.0485277530560948	0.089	64.795854487155	0.581	0.20487744051324
1211	1211	hsa:4833	3	607	-0.0474497328563065	0.094	69.9012482345307	0.392	0.158481550630184
1212	1212	hsa:4837	4	1278	-9.25192295248975e-05	0.477	210.830247738291	0.256	0.378891143418488
1213	1213	hsa:4842	4	2145	-0.00975688317561654	0.256	308.203649272817	0.093	0.112795962032851
1214	1214	hsa:4843	4	2190	-0.0172454098464462	0.173	310.396915677368	0.378	0.243744675868581
1215	1215	hsa:4848	7	47	-0.00852834847328889	0.482	9.61010802763675	0.004	0.0139804525756264
1216	1216	hsa:4849	6	26	-0.0813208977086037	0.299	4.32339580868038	0.022	0.0396260333663341
1217	1217	hsa:4850	11	2303	-0.0279286927500086	0.046	427.553613009123	0.433	0.097919505891909
1218	1218	hsa:4851	16	2694	-0.00627626761960457	0.384	355.353704622667	0.499	0.50821581807471
1219	1219	hsa:4852	6	2500	-0.00512304751632307	0.385	338.835171966256	0.248	0.319747097832799
1220	1220	hsa:4854	2	83	0.12042023455469	0.901	14.8704813528267	0.001	0.0072188167756207
1221	1221	hsa:4860	3	338	-0.0213512866641485	0.278	43.8529602626255	0.36	0.330442684115374
1222	1222	hsa:4862	4	1132	-0.0215434083969534	0.172	139.236973699279	0.191	0.145065977639779
1223	1223	hsa:4881	12	2665	-0.00844314828556025	0.292	313.42997289766	0.434	0.388511578418366
1224	1224	hsa:4882	3	385	-0.0155429930706264	0.35	39.2050998205901	0.14	0.196780814062704
1225	1225	hsa:4893	2	780	-0.0354620803790083	0.09	122.442073519869	0.987	0.303890170245653
1226	1226	hsa:4905	16	2693	-0.0188429409410312	0.127	343.987288620834	0.555	0.257436267391661
1227	1227	hsa:4907	2	155	-0.072546683634834	0.112	24.0890941710883	0.204	0.109188117397665
1228	1228	hsa:4908	3	538	0.0716889167672154	0.976	70.3904263847005	0.017	0.0845998641393965
1229	1229	hsa:4914	4	2031	-0.0426334798753818	0.021	299.981333740505	0.448	0.0533075615046658
1230	1230	hsa:4915	3	921	-0.0411738016798638	0.067	95.4160018322709	0.794	0.209266806724798
1231	1231	hsa:4916	3	904	-0.0503117021937724	0.038	175.879184639463	0.478	0.0909710094246182
1232	1232	hsa:4923	4	1213	-0.0214801937309143	0.189	247.159407565752	0.004	0.00618972670142927
1233	1233	hsa:4927	5	37	-0.197825376431871	0.071	5.68316982860633	0.094	0.0401076425876098
1234	1234	hsa:4928	12	2625	-0.015235332302085	0.175	339.995266633584	0.447	0.277555284522942
1235	1235	hsa:4931	5	26	0.18033624995402	0.879	6.86975607894034	0.000999000999000999	0.00705810231386425
1236	1236	hsa:4942	13	2672	-0.0155803008219452	0.182	311.597205786922	0.508	0.312595809169457
1237	1237	hsa:4952	4	1945	-0.0435215582423029	0.017	223.263656143833	0.379	0.0389463951798636
1238	1238	hsa:4953	16	2693	-0.0154236300430472	0.193	543.639386189258	0.529	0.33506519529242
1239	1239	hsa:4967	15	2685	-0.00493065114037055	0.407	321.557048517006	0.498	0.52619257643511
1240	1240	hsa:4973	6	2449	-0.00294441499334446	0.447	363.810741687979	0.168	0.269518641642517
1241	1241	hsa:4982	6	2362	-0.0279967378086903	0.059	276.479177005001	0.614	0.156423077762827
1242	1242	hsa:4988	2	162	-0.124527600587826	0.034	25.916364469214	0.075	0.0177777378955201
1243	1243	hsa:4991	2	37	-0.305673507907201	0.006	6.95900293926785	0.005	0.000342429395289063
1244	1244	hsa:4998	3	46	-0.432533569335343	0.005	10.1423445432683	0.109	0.00464052499599906
1245	1245	hsa:4999	3	46	-0.450939253136847	0.002	10.7459251059282	0.000999000999000999	2.82185072482266e-05
1246	1246	hsa:5000	3	46	-0.435162952735558	0.003	10.7033629804939	0.001	4.11506948078884e-05
1247	1247	hsa:5001	3	46	-0.443051102936203	0.004	7.95110127113792	0.345	0.010468227056142
1248	1248	hsa:5009	5	2283	-0.0257683458706404	0.061	423.012558689926	0.239	0.076221536235169
1249	1249	hsa:5019	4	486	-0.0204909222641546	0.283	64.5611711264649	0.261	0.266316241296217
1250	1250	hsa:5020	3	266	0.0211232597546097	0.662	37.3796236210253	0.04	0.122638559708745
1251	1251	hsa:5021	2	266	0.0164115963466031	0.633	35.3566820628316	0.089	0.218384958970097
1252	1252	hsa:5029	4	1213	-0.0193321768969386	0.215	199.482765202122	0.003	0.00538333785555369
1253	1253	hsa:5033	7	1954	0.0329392357647021	0.953	331.359086918349	0.065	0.234245536872552
1254	1254	hsa:5048	3	577	-0.0635309965178786	0.054	88.9188456693514	0.158	0.0491778633734787
1255	1255	hsa:5049	3	577	-0.0717226347918625	0.03	69.7170286674046	0.385	0.0630753566752656
1256	1256	hsa:5050	3	577	-0.0613326015817295	0.056	112.178226514486	0.953	0.209765270248067
1257	1257	hsa:5051	3	577	-0.0704925804823505	0.03	70.1265412070084	0.923	0.127005278348422
1258	1258	hsa:5053	6	2306	-0.0045060459319506	0.389	337.640340497003	0.161	0.236144326048653
1259	1259	hsa:5054	3	1032	0.00887810682997468	0.638	146.618849486582	0.025	0.0819558283735329
1260	1260	hsa:5055	7	2337	-0.0418476351521655	0.034	242.46745810589	0.313	0.0589880403011623
1261	1261	hsa:5058	2	271	-0.148392818231911	0.001	45.4003130129404	0.099	0.00101181868007514
1262	1262	hsa:5062	2	238	-0.0822450961966477	0.052	32.1311982288048	0.654	0.148994471865375
1263	1263	hsa:5063	2	216	-0.0996393495799801	0.032	38.6090392029622	0.553	0.0890890371028526
1264	1264	hsa:5078	3	10	0.200821358692236	0.835	3.93984043974501	0.001	0.00675354582564971
1265	1265	hsa:5080	4	1749	0.0461500829003634	0.993	241.674199335802	0.07	0.254843446151466
1266	1266	hsa:5091	4	1467	-0.0139990781241284	0.274	294.861663549261	0.373	0.335304733671554
1267	1267	hsa:5095	6	2204	0.00516595908518564	0.635	376.254227583311	0.219	0.413414355165358
1268	1268	hsa:5096	2	41	-0.0516695549975549	0.344	7.35847616139252	0.379	0.39599528750961
1269	1269	hsa:5104	6	2143	-0.0243391389100916	0.11	278.009657594381	0.454	0.199606833726878
1270	1270	hsa:5105	13	2685	-0.0111813498283987	0.254	287.682978967057	0.437	0.354998587153175
1271	1271	hsa:5106	3	881	-0.0284090010686788	0.16	106.804252395312	0.627	0.330994825074424
1272	1272	hsa:5111	15	2693	-0.0192309051380338	0.127	466.627858151697	0.539	0.252017105619545
1273	1273	hsa:5130	4	634	-0.0411725511049067	0.112	89.7649349162118	0.154	0.0872758990852397
1274	1274	hsa:5132	2	145	-0.0428591484492956	0.279	17.4337901286407	0.185	0.204598915419199
1275	1275	hsa:5136	16	2694	-0.00766888209307707	0.322	434.837156926366	0.459	0.430374297171103
1276	1276	hsa:5137	3	690	-0.0287815664913602	0.183	115.622170477536	0.037	0.0405928660605728
1277	1277	hsa:5138	3	533	-0.042350688288968	0.137	95.8712829713326	0.811	0.35523814214915
1278	1278	hsa:5140	15	2694	-0.0126367025085341	0.225	497.61926938199	0.508	0.362208551345131
1279	1279	hsa:5141	3	533	-0.0423068923341707	0.138	87.281253578654	0.732	0.332592791865163
1280	1280	hsa:5143	3	533	-0.0449784455768047	0.129	63.6855365118143	0.473	0.231657310918758
1281	1281	hsa:5145	2	191	0.0516507646755478	0.817	35.792495323892	0.045	0.158207477904623
1282	1282	hsa:5146	3	533	-0.0517095446699653	0.091	93.9552620529068	0.274	0.11697843311211
1283	1283	hsa:5147	3	533	-0.0512458809474762	0.093	73.3893193877161	0.552	0.203771219919458
1284	1284	hsa:5149	3	533	-0.0577592522872029	0.067	67.2307897850899	0.114	0.0448703436659858
1285	1285	hsa:5152	1	28	NA	1	4.84108867427568	0.05	0.1997866136777
1286	1286	hsa:5155	15	2693	-0.00820764395865606	0.356	450.83032408291	0.549	0.514502691927737
1287	1287	hsa:5156	2	490	0.0666850688370493	0.95	76.2391876932473	0.04	0.162266426531719
1288	1288	hsa:5158	3	776	-0.0080982791429093	0.397	78.0045806771768	0.281	0.356225999803335
1289	1289	hsa:5159	4	2052	-0.029635287991387	0.074	415.441920830629	0.483	0.154813928566605
1290	1290	hsa:5161	2	105	-0.132151792222052	0.062	16.4315761346719	0.844	0.206707304639298
1291	1291	hsa:5162	2	105	-0.180972199539753	0.019	16.0064511203573	0.005	0.000974855198304556
1292	1292	hsa:5163	2	111	0.0642476779951161	0.798	19.9663320227507	0.056	0.183580550455898
1293	1293	hsa:5167	14	2691	0.0122991162006032	0.786	320.662136885903	0.482	0.746569407684193
1294	1294	hsa:5168	3	555	-0.0605219436960337	0.061	88.3509943886704	0.953	0.22352265172602
1295	1295	hsa:5170	5	2446	-0.0291638705298319	0.057	436.945184563118	0.276	0.0810521831328586
1296	1296	hsa:5173	15	2694	-0.008328826501106	0.341	406.571248616254	0.466	0.451204441412287
1297	1297	hsa:5187	2	85	-0.078224938413074	0.207	17.4825361682635	0.52	0.347565572274206
1298	1298	hsa:5207	5	2386	-0.00615081335988512	0.353	475.377829522464	0.245	0.298181624362703
1299	1299	hsa:5208	5	2400	-0.00565461139573552	0.364	460.59163262969	0.312	0.36061854657397
1300	1300	hsa:5209	3	910	0.0245636245580979	0.782	106.005115089514	0.072	0.218290027978877
1301	1301	hsa:5210	6	2538	-0.00711433763362987	0.334	480.402488834599	0.417	0.413834401472646
1302	1302	hsa:5211	14	2690	-0.00794527970243664	0.32	364.07882581975	0.559	0.486739651123075
1303	1303	hsa:5213	14	2690	-0.00833498623627237	0.303	515.256861472688	0.516	0.446478447471308
1304	1304	hsa:5214	2	103	0.105367206152242	0.894	15.2884681452075	0.000999000999000999	0.0071634355935192
1305	1305	hsa:5217	5	2142	-0.0358791813067466	0.037	351.360461121502	0.732	0.12482506776572
1306	1306	hsa:5226	1	2	NA	1	0.542848417757758	0.116	0.36588315019359
1307	1307	hsa:5228	2	316	-0.0627717276268866	0.097	36.350879871741	0.89	0.297802078817707
1308	1308	hsa:5230	2	105	-0.0205777361107393	0.407	14.0370271405123	0.088	0.155060377746885
1309	1309	hsa:5236	2	112	0.207211374144499	0.995	14.9568271176089	0.111	0.353781578884943
1310	1310	hsa:5238	1	4	NA	1	0.822117036301866	0.038	0.162266426531719
1311	1311	hsa:5241	4	2064	-0.0382618772658074	0.023	255.168492575486	0.187	0.0277367521260015
1312	1312	hsa:5244	7	2449	-0.00224918061005643	0.456	509.821010039317	0.207	0.317185338977777
1313	1313	hsa:5255	11	2651	-0.0107740683210184	0.235	357.048860556552	0.41	0.321786635635132
1314	1314	hsa:5256	11	2651	-0.0103322649196424	0.254	311.682101003932	0.412	0.34085454103216
1315	1315	hsa:5257	11	2651	-0.0107443949582394	0.241	285.366225140283	0.406	0.325275374045855
1316	1316	hsa:5261	11	2651	-0.0108380309030087	0.236	337.655113180899	0.454	0.346458862117918
1317	1317	hsa:5265	4	554	-0.0248291024971992	0.235	92.8426919112875	0.000999000999000999	0.00219668058728871
1318	1318	hsa:5269	2	7	-0.534522483824849	0.117	1.34133679428942	0.004	0.00405617577863783
1319	1319	hsa:5272	4	391	-0.0344979168011406	0.2	79.014390960797	0.013	0.0180758339682822
1320	1320	hsa:5277	14	77	-0.0323161107950964	0.339	17.3622933923732	0.208	0.257507875815667
1321	1321	hsa:5279	8	34	0.0136177750489365	0.521	5.87998625796847	0.121	0.237284430917488
1322	1322	hsa:5281	13	36	0.0267000626304938	0.594	8.9368629995801	0.001	0.00500660695572937
1323	1323	hsa:5283	15	228	-0.049307660707515	0.175	29.1244799022789	0.826	0.424128464110634
1324	1324	hsa:5287	5	2259	-0.0276937675216945	0.062	387.969576669084	0.266	0.0841896787193554
1325	1325	hsa:5289	3	1085	-0.0232508643742739	0.181	144.713745848761	0.127	0.109712961381794
1326	1326	hsa:5290	3	1777	-0.0542330407918318	0.009	321.391228003206	0.32	0.0197278991563227
1327	1327	hsa:5291	3	1777	-0.0542888326225609	0.009	262.079932816735	0.697	0.038086523074779
1328	1328	hsa:5292	3	709	-0.0339504604621352	0.148	106.878306676337	0.061	0.0515266276640023
1329	1329	hsa:5293	1	138	NA	1	27.8883459938161	0.000999000999000999	0.00790085392538984
1330	1330	hsa:5294	3	1797	-0.0516795501616482	0.008	312.724624957056	0.04	0.00289510065989456
1331	1331	hsa:5295	3	1777	-0.0530143344987825	0.008	194.641218460129	0.443	0.0235410173286721
1332	1332	hsa:5296	3	1777	-0.05208052570828	0.008	269.476619460244	0.177	0.0107048457057342
1333	1333	hsa:5298	5	2334	-0.0386708268801955	0.028	278.542924762377	0.817	0.109293909215205
1334	1334	hsa:5300	6	2253	-0.0463740952726835	0.009	265.762530060694	0.581	0.0326997356851254
1335	1335	hsa:5305	4	1959	-0.0354695414310756	0.031	344.438256288888	0.13	0.0262513752791849
1336	1336	hsa:5308	5	2117	0.000830788664812691	0.531	294.679161736077	0.094	0.199528906699734
1337	1337	hsa:5313	3	857	-0.0141313892834499	0.308	128.063900446616	0.285	0.301341857584701
1338	1338	hsa:5315	3	844	-0.0201177162477456	0.249	114.097453906936	0.458	0.361648676337984
1339	1339	hsa:5319	2	347	-0.0516423836932928	0.137	46.904149330076	0.46	0.237226384049993
1340	1340	hsa:5320	2	347	-0.0533263744659001	0.126	46.3439325113563	0.535	0.249212201956513
1341	1341	hsa:5321	2	552	-0.06083624816443	0.052	62.7673779440394	0.069	0.0237890152812107
1342	1342	hsa:5322	2	347	-0.0516423836932928	0.132	70.4075657518036	0.127	0.0853039752460834
1343	1343	hsa:5327	15	2689	-0.0107197976063374	0.289	327.089094171088	0.425	0.380388374141411
1344	1344	hsa:5328	2	230	0.0378999084343869	0.762	37.1323815704088	0.000999000999000999	0.0062273620269624
1345	1345	hsa:5329	3	1010	0.0565165145773031	0.989	149.462190327137	0.000999000999000999	0.00782487288080043
1346	1346	hsa:5330	2	627	-0.0969156810422872	0.005	141.57403519487	0.223	0.00869577447458812
1347	1347	hsa:5331	2	627	-0.0971723851689274	0.003	117.83620261862	0.05	0.0014707312895802
1348	1348	hsa:5332	2	627	-0.0921962744063649	0.005	105.484597472993	0.638	0.0215252726153714
1349	1349	hsa:5333	5	2385	-0.0276727209138543	0.068	536.082490361492	0.296	0.0987407903242856
1350	1350	hsa:5334	3	21	-0.0896993701844905	0.341	5.19334274916975	0.016	0.033887430739654
1351	1351	hsa:5336	2	558	-0.0513410078671475	0.073	108.373821429935	0.229	0.0851117487863949
1352	1352	hsa:5337	5	2396	-0.024201702754299	0.086	468.068824674581	0.537	0.188199277751718
1353	1353	hsa:5338	3	1141	-0.0211610463247529	0.206	234.684582204069	0.098	0.0989750395892572
1354	1354	hsa:5340	5	2110	-0.0307970453065978	0.086	384.947093178608	0.132	0.0621903579217401
1355	1355	hsa:5345	4	554	-0.020051311203511	0.277	101.325953353437	0.046	0.0683334557916776
1356	1356	hsa:5346	2	61	-0.0928877155295032	0.213	11.4074130625644	0.478	0.33441904427115
1357	1357	hsa:5347	1	9	NA	1	3.50253845860213	0.000999000999000999	0.00790085392538984
1358	1358	hsa:5350	3	1062	0.0282252685086097	0.833	183.984349352979	0.084	0.256073737703513
1359	1359	hsa:5351	6	2261	-0.0116116305961647	0.251	347.443027827614	0.105	0.122184343515929
1360	1360	hsa:5352	4	550	-0.0287082106687392	0.196	73.797037828759	0.154	0.135841380456127
1361	1361	hsa:5360	5	2136	-0.0057176255546175	0.392	313.293277856243	0.289	0.360009102141594
1362	1362	hsa:5361	3	756	-0.0292224892726684	0.202	109.601099362522	0.000999000999000999	0.00191874621069033
1363	1363	hsa:5362	5	2156	-0.0397662388559873	0.043	225.186777111883	0.392	0.085679867243407
1364	1364	hsa:5364	3	690	-0.0359933097066265	0.147	95.8454021452838	0.303	0.183123425024382
1365	1365	hsa:5371	4	1150	-0.0035521617219187	0.427	160.084666183151	0.011	0.0298768244842894
1366	1366	hsa:5372	14	2688	-0.00760556484906813	0.307	310.116883612627	0.489	0.434801293074802
1367	1367	hsa:5373	12	2658	-0.00735905752694433	0.326	366.713860365691	0.455	0.431390476331723
1368	1368	hsa:5406	4	1153	-0.0110591217737922	0.359	250.558537237088	0.048	0.0872109307164456
1369	1369	hsa:5407	4	1153	-0.0114914742711215	0.343	182.999198381494	0.012	0.0267246671655185
1370	1370	hsa:5408	12	2658	-0.0178090639478351	0.179	329.321067297782	0.35	0.23620250359215
1371	1371	hsa:5409	3	142	-0.0735130831404975	0.152	14.6971408939955	0.994	0.436628127968756
1372	1372	hsa:5411	5	25	-0.127491051662335	0.214	5.69221666603046	0.000999000999000999	0.00202039389136959
1373	1373	hsa:5424	3	355	-0.0183669542293693	0.315	50.171011947933	0.284	0.305413190900241
1374	1374	hsa:5430	3	567	-0.0373993972744705	0.144	102.503607283277	0.099	0.0748522315320645
1375	1375	hsa:5431	3	567	-0.0376497536928887	0.142	74.5927777989846	0.398	0.218899551175861
1376	1376	hsa:5432	3	567	-0.0385548884364006	0.135	78.1663930984464	0.634	0.295986210359335
1377	1377	hsa:5433	3	567	-0.0433886931304748	0.11	83.9566362560598	0.225	0.116298512301694
1378	1378	hsa:5434	3	567	-0.0400185105748454	0.127	73.1660113753483	0.394	0.199900437067751
1379	1379	hsa:5435	3	567	-0.0367831353214411	0.147	92.6709546894682	0.656	0.321978461717907
1380	1380	hsa:5436	2	155	0.094832786025379	0.936	24.8485704469977	0.021	0.0968917486858106
1381	1381	hsa:5437	3	567	-0.0423102347126734	0.117	109.340191624995	0.562	0.244725523681781
1382	1382	hsa:5438	3	567	-0.0407118052720034	0.125	94.7076001068825	0.266	0.146423042020019
1383	1383	hsa:5440	3	567	-0.0365520370890551	0.146	77.1155475817842	0.532	0.276144189432727
1384	1384	hsa:5441	1	26	NA	1	5.19853418330343	0.033	0.145571174678017
1385	1385	hsa:5443	2	62	-0.193130755724271	0.025	10.8881933045769	0.928	0.110515589607189
1386	1386	hsa:5464	2	32	-0.129419394422186	0.207	5.33595449860671	0.055	0.0623380959272254
1387	1387	hsa:5465	6	2479	-0.0134654771769926	0.215	287.628354391724	0.481	0.338064178935066
1388	1388	hsa:5467	3	711	0.0246474565618036	0.813	79.0096957666908	0.133	0.348654426092334
1389	1389	hsa:5468	1	23	NA	1	5.86502271252433	0.002	0.0144292161968444
1390	1390	hsa:5469	12	2657	-0.0131020911967841	0.27	394.553345802954	0.401	0.348967978875556
1391	1391	hsa:5471	2	38	-0.102250633416813	0.246	7.23059892354086	0.279	0.252502237564611
1392	1392	hsa:5473	2	52	0.0250690348998411	0.587	10.4286750391266	0.000999000999000999	0.00495020163334811
1393	1393	hsa:5494	2	49	-0.233337558587679	0.03	6.44428751383746	0.305	0.0521001128072065
1394	1394	hsa:5495	5	2033	-0.0329668104631962	0.051	265.91323433981	0.805	0.172137154906307
1395	1395	hsa:5498	3	8	-0.50709255283711	0.083	1.30793602320876	0.334	0.127120033751248
1396	1396	hsa:5500	10	2649	-0.017855336370559	0.137	340.962133068672	0.47	0.240998694801249
1397	1397	hsa:5501	15	2694	-0.0180291611722717	0.142	484.657174485628	0.524	0.267734256648051
1398	1398	hsa:5507	5	2306	-0.0198653123697533	0.087	445.52662518609	0.299	0.120938569579151
1399	1399	hsa:5509	4	1848	-0.0219645120297503	0.1	202.911096690461	0.238	0.112766058819652
1400	1400	hsa:5515	4	2215	-0.0285577770688302	0.042	298.80669542314	0.59	0.116409462020917
1401	1401	hsa:5516	3	1536	-0.0142073106401307	0.243	245.191166927511	0.001	0.00226535513485357
1402	1402	hsa:5518	4	2215	-0.0284436865363895	0.044	370.174638317365	0.355	0.0805867529619927
1403	1403	hsa:5519	4	2215	-0.0283733986190823	0.042	271.506661068061	0.255	0.0592967438953358
1404	1404	hsa:5520	5	2443	-0.0253992998937712	0.078	271.709775928541	0.65	0.20187874897712
1405	1405	hsa:5521	5	2443	-0.0245895181694786	0.083	356.016604954766	0.526	0.180367296338717
1406	1406	hsa:5523	2	132	0.0879661474599222	0.861	20.9495743787457	0.066	0.219789404287874
1407	1407	hsa:5525	5	2371	-0.0166778713659482	0.142	299.635836164446	0.401	0.22012194628398
1408	1408	hsa:5526	5	2371	-0.0165250076206467	0.143	466.727067984884	0.301	0.178437152400593
1409	1409	hsa:5527	2	134	0.104271882101344	0.917	20.4018780776425	0.047	0.178613267104819
1410	1410	hsa:5529	5	2371	-0.0169486585719108	0.14	416.637859296866	0.409	0.221032359595415
1411	1411	hsa:5530	3	1141	-0.0488899780109647	0.018	142.810474481811	0.509	0.0521564329585881
1412	1412	hsa:5532	3	1141	-0.0473133773170712	0.022	197.303393518342	0.37	0.047301255905597
1413	1413	hsa:5533	3	1141	-0.0476665768231707	0.019	162.608046722907	0.12	0.016150562026116
1414	1414	hsa:5534	3	1133	-0.0471551489940965	0.022	148.166087719968	0.156	0.0229072687181272
1415	1415	hsa:5536	6	2336	-0.039901226112451	0.024	331.481887238997	0.746	0.0899269781051946
1416	1416	hsa:5538	6	506	-0.00283589861945864	0.451	63.5267015307096	0.051	0.109765776689543
1417	1417	hsa:5557	2	117	0.0654137763270724	0.801	18.5773561858228	0.098	0.278250458015425
1418	1418	hsa:5562	5	2455	-0.0251290867526518	0.056	294.548154368821	0.456	0.119193520449804
1419	1419	hsa:5563	5	2455	-0.0239971459079378	0.067	248.551437187464	0.358	0.113460614862812
1420	1420	hsa:5564	14	2693	-0.0229024064581513	0.103	421.881856701149	0.491	0.201499897451238
1421	1421	hsa:5565	4	2038	-0.0132263923545067	0.255	286.296140779479	0.109	0.127381681334379
1422	1422	hsa:5566	1	131	NA	1	27.2342634652823	0.07	0.256148202585295
1423	1423	hsa:5567	2	838	0.030679703874882	0.829	159.716570599687	0.085	0.257383217446754
1424	1424	hsa:5568	1	130	NA	1	16.9099896934764	0.07	0.256148202585295
1425	1425	hsa:5569	5	2302	-0.00242239025638014	0.469	320.71794480284	0.395	0.497599010170399
1426	1426	hsa:5571	14	2693	-0.0230848394493194	0.101	409.17364583731	0.505	0.20278729136229
1427	1427	hsa:5573	2	22	-0.301511344577764	0.055	4.55033019047983	0.021	0.00896702144993468
1428	1428	hsa:5575	2	22	-0.301511344577764	0.057	4.26732068557468	0.267	0.0789137206042908
1429	1429	hsa:5576	2	22	-0.301511344577764	0.056	2.76027789441539	0.715	0.168883768034386
1430	1430	hsa:5577	2	22	-0.301511344577764	0.056	3.70286674046646	0.098	0.0340540903404094
1431	1431	hsa:5578	4	2297	-0.0190896285242815	0.117	334.087872657174	0.522	0.231816690660928
1432	1432	hsa:5579	4	2322	-0.0175684004129984	0.148	377.489903424056	0.628	0.313756462494479
1433	1433	hsa:5580	2	522	-0.000156241844338996	0.509	71.0723365270832	0.007	0.0236481739739731
1434	1434	hsa:5581	3	1237	-0.033053363886994	0.078	182.220597778372	0.245	0.0947386566811494
1435	1435	hsa:5582	2	811	-0.0216657301655164	0.232	102.692560216819	0.431	0.330240088298652
1436	1436	hsa:5583	5	2260	-0.0199327201523452	0.131	407.70817269153	0.298	0.165646812532485
1437	1437	hsa:5584	5	2388	-0.0413132606507237	0.019	375.962094896362	0.469	0.0509750975690427
1438	1438	hsa:5585	4	1834	-0.0339116684979732	0.091	212.306599992366	0.01	0.00728188002219258
1439	1439	hsa:5586	4	1834	-0.0347964540973681	0.081	260.50685192961	0.307	0.116731010976407
1440	1440	hsa:5588	4	2026	-0.0390974171355274	0.028	328.763560713059	0.163	0.0291619328856273
1441	1441	hsa:5591	15	2690	-0.0252794218502569	0.074	534.929686605336	0.503	0.159714215777848
1442	1442	hsa:5593	5	2398	-0.0273026359311509	0.05	356.603313356491	0.44	0.105967682163724
1443	1443	hsa:5594	14	2694	-0.0160046465502367	0.227	380.46341184105	0.497	0.358986731462542
1444	1444	hsa:5595	14	2694	-0.0146838012481195	0.245	303.242126961102	0.488	0.373497900733679
1445	1445	hsa:5598	6	2532	-0.0214408979083417	0.111	412.277550864603	0.329	0.157394063644372
1446	1446	hsa:5599	4	2241	-0.033045339253124	0.037	324.10058403634	0.285	0.058546931038967
1447	1447	hsa:5600	4	2267	-0.0260348805088505	0.088	491.642363629423	0.216	0.0943347145429225
1448	1448	hsa:5601	5	2484	-0.0335685602263567	0.037	378.237279077757	0.448	0.0845342750683144
1449	1449	hsa:5602	5	2484	-0.0334695525277094	0.037	374.15574302401	0.715	0.122547763764972
1450	1450	hsa:5603	4	2267	-0.0269745209366674	0.081	370.675840745123	0.48	0.165134063640279
1451	1451	hsa:5605	2	401	0.0578698620246827	0.904	76.8049394968889	0.01	0.0515831087853856
1452	1452	hsa:5606	4	1921	-0.0333047102517758	0.045	365.406840477917	0.198	0.0509703770441199
1453	1453	hsa:5607	4	1578	-0.0452046310243718	0.014	329.94671145551	0.327	0.0292373652170142
1454	1454	hsa:5608	4	1921	-0.034993976912738	0.039	303.011528037562	0.804	0.139921435395111
1455	1455	hsa:5609	5	2311	-0.0328686159112192	0.044	513.957781425354	0.222	0.054980590119953
1456	1456	hsa:5610	4	1867	-0.0233444309177853	0.101	333.359964881475	0.406	0.171980676363662
1457	1457	hsa:5617	4	1567	-0.0278927355918171	0.158	314.700080161851	0.021	0.0222584482633757
1458	1458	hsa:5618	2	228	-0.0769670258016026	0.106	25.613810741688	0.704	0.268295152868569
1459	1459	hsa:5621	5	2244	-0.0206850252947835	0.138	359.093102263618	0.272	0.1607462236172
1460	1460	hsa:5624	2	32	-0.145951510159958	0.188	6.46787800129786	0.018	0.0226345500972139
1461	1461	hsa:5625	3	65	-0.109289274853445	0.149	9.02568996449975	0.988	0.429252755367335
1462	1462	hsa:5630	6	2281	-0.0265570648435777	0.079	372.561934572661	0.131	0.0576528858413823
1463	1463	hsa:5631	2	40	0.0952623326193962	0.783	6.44279879375501	0.042	0.145182095301993
1464	1464	hsa:5634	5	1670	0.0249527588110255	0.868	254.223766080085	0.194	0.468375727540642
1465	1465	hsa:5641	4	535	0.0202813857466703	0.725	88.3469099515212	0.029	0.102224455612414
1466	1466	hsa:5644	6	2337	-0.0409767492693819	0.039	382.973432072375	0.384	0.0778947640360816
1467	1467	hsa:5648	9	2542	-0.0362877696592697	0.062	360.282818643356	0.407	0.118084092425984
1468	1468	hsa:5649	3	772	-0.0106482748668125	0.377	87.8226514486391	0.045	0.086124567871855
1469	1469	hsa:5663	2	217	-0.000638998899356655	0.487	34.2568996449975	0.024	0.0636901631617904
1470	1470	hsa:5720	2	58	0.0743711573927702	0.744	11.8784211932664	0.000999000999000999	0.00609802692653089
1471	1471	hsa:5723	4	242	-0.018592843351382	0.343	41.3540863457648	0.426	0.427152705831443
1472	1472	hsa:5724	2	96	-0.107275574087602	0.092	21.8349429323968	0.095	0.0501662460806104
1473	1473	hsa:5727	2	36	-0.105644281841065	0.263	5.52040309959156	0.469	0.381481897706645
1474	1474	hsa:5731	2	67	-0.13429704258708	0.099	8.96747719204489	0.06	0.0363887141049091
1475	1475	hsa:5732	17	2694	-0.00672025018654489	0.371	502.728671221896	0.489	0.491091437441101
1476	1476	hsa:5733	2	67	-0.13429704258708	0.094	16.2617475283429	0.148	0.0733858487188523
1477	1477	hsa:5734	4	1283	0.0301937607671203	0.869	204.945146390808	0.014	0.0658072335141154
1478	1478	hsa:5737	3	319	0.102599709248577	0.988	59.859754933771	0.026	0.119750554204543
1479	1479	hsa:5739	3	361	-0.00684437005967753	0.428	54.816772912929	0.132	0.218842083006721
1480	1480	hsa:5742	2	172	-0.0224475701301989	0.381	23.692102149101	0.354	0.40508249621203
1481	1481	hsa:5743	2	408	-0.057196021280612	0.09	65.4846356453029	0.009	0.00657596581134121
1482	1482	hsa:5745	3	361	0.000577969027261658	0.493	73.3510707332901	0.009	0.0284756756908193
1483	1483	hsa:5747	15	2694	-0.0177286464347526	0.22	374.860747413826	0.512	0.358596016663516
1484	1484	hsa:5770	5	2257	0.00366018798117301	0.584	336.082146810703	0.142	0.289400684614125
1485	1485	hsa:5777	2	420	-0.0724882246655725	0.095	81.0889033095392	0.000999000999000999	0.000973976174661538
1486	1486	hsa:5778	4	1936	-0.0106874870953726	0.289	445.488491048593	0.07	0.0991389079404442
1487	1487	hsa:5781	4	2034	-0.044664813004562	0.034	394.84227201588	0.447	0.0788258166858876
1488	1488	hsa:5787	5	2172	-0.00137692770917731	0.46	371.507539031187	0.148	0.251015847784335
1489	1489	hsa:5788	3	560	-0.0904864461481532	0.036	125.427720731381	0.000999000999000999	0.000403983696617667
1490	1490	hsa:5792	2	145	0.071023481858956	0.835	23.978699851128	0.006	0.0315445600130657
1491	1491	hsa:5801	2	218	0.0184402836774402	0.605	21.9799595373516	0.123	0.267752443661508
1492	1492	hsa:5803	3	45	-0.157313301241423	0.087	7.11035614765049	0.05	0.0280034705373847
1493	1493	hsa:5805	8	380	0.0455533611292274	0.842	53.4081765087605	0.03	0.11817974767363
1494	1494	hsa:5817	3	29	-0.133169028485543	0.226	5.79314425315876	0.098	0.106532058956314
1495	1495	hsa:5818	3	800	-0.0472780107555519	0.065	191.173416803451	0.037	0.0169076439278957
1496	1496	hsa:5819	4	1656	-0.0233840096272856	0.132	258.23670649311	0.017	0.0159312674337259
1497	1497	hsa:5822	13	2373	-0.0256834338121525	0.05	311.217543993587	0.486	0.114629877965846
1498	1498	hsa:5831	3	65	-0.0883296878952497	0.179	9.83230904302019	0.276	0.19799759088402
1499	1499	hsa:5834	3	541	0.0604726525992965	0.963	79.4767339771729	0.083	0.28187893329534
1500	1500	hsa:5836	5	2229	2.74147402526962e-05	0.427	209.184792151773	0.441	0.502719746098767
1501	1501	hsa:5837	5	2229	-0.000436143594929257	0.416	427.953887849754	0.159	0.245785884939613
1502	1502	hsa:5863	3	802	-0.0453869171643163	0.049	90.6022827041264	0.639	0.139765597355263
1503	1503	hsa:5864	6	1969	-0.039034699369805	0.028	318.979768675803	0.067	0.0136546787916748
1504	1504	hsa:5868	6	2370	-0.0255881875334512	0.073	345.576363705768	0.356	0.120847328590429
1505	1505	hsa:5869	6	2355	-0.0166503028796574	0.149	317.981524602054	0.308	0.187306567413424
1506	1506	hsa:5871	4	1388	-0.033878364215119	0.128	178.563461465053	0.041	0.0327995183770822
1507	1507	hsa:5878	4	1256	-0.00925275445256707	0.334	157.734435240676	0.122	0.171155801503323
1508	1508	hsa:5879	4	2112	-0.0331331409089675	0.058	277.092835057449	0.517	0.135147641841862
1509	1509	hsa:5880	2	523	-0.00766349272691868	0.397	114.609955338398	0.000999000999000999	0.00350302876095029
1510	1510	hsa:5881	4	2075	-0.0529647798172868	0.013	404.01187158835	0.331	0.0277476494765158
1511	1511	hsa:5885	4	77	-0.0877924476138885	0.195	13.7966942779708	0.006	0.00906837929030179
1512	1512	hsa:5888	6	242	-0.0898495288953535	0.064	38.6663358399817	0.128	0.0475512603499314
1513	1513	hsa:5889	5	44	0.0434058001565486	0.632	7.8884223384357	0.043	0.125156922403814
1514	1514	hsa:5894	4	2218	-0.0332924578105947	0.034	274.783257624919	0.426	0.0758195495916485
1515	1515	hsa:5896	3	540	-0.0464140466656831	0.087	55.8524258502882	0.358	0.139193637180303
1516	1516	hsa:5897	3	540	-0.0481906608921208	0.082	94.3561476504943	0.201	0.0841486268883281
1517	1517	hsa:5898	6	2505	-0.0341907176998129	0.034	366.501736840096	0.717	0.114919700670823
1518	1518	hsa:5899	6	2505	-0.0342747880053569	0.035	320.80482497996	0.408	0.0749542251991696
1519	1519	hsa:5900	3	1061	-0.0384271372101188	0.073	142.481734549758	0.084	0.0373698448378078
1520	1520	hsa:5901	8	2372	-0.0273974630208604	0.049	379.116959957247	0.262	0.0687519288167162
1521	1521	hsa:5903	13	2655	-0.02101086089627	0.121	422.86975607894	0.393	0.192395177274894
1522	1522	hsa:5905	4	11	0.557013401650955	0.983	2.84857044699775	0.022	0.104537034397906
1523	1523	hsa:5906	4	2131	-0.0386608542934891	0.032	341.996335458259	0.225	0.0427224546213129
1524	1524	hsa:5909	6	2412	-0.0400774215232327	0.031	365.725197541703	0.448	0.0732832279213389
1525	1525	hsa:5914	5	2003	-0.0306252721966898	0.079	307.270412642669	0.269	0.103096067026603
1526	1526	hsa:5921	16	2694	-0.0121812118859997	0.293	390.409970607321	0.459	0.404306619139651
1527	1527	hsa:5922	2	151	-0.0779053858582679	0.141	35.375730045425	0.001	0.00139121184412964
1528	1528	hsa:5923	4	2051	-0.00171227437419987	0.455	295.5640340497	0.336	0.440004230557182
1529	1529	hsa:5925	11	2651	-0.025625378246062	0.072	332.21506279345	0.495	0.154473977146166
1530	1530	hsa:5933	11	2652	-0.0206390191194308	0.144	441.169294193992	0.495	0.25954042326202
1531	1531	hsa:5934	2	113	-0.0156145553857691	0.417	16.0420277130969	0.039	0.0832480639280527
1532	1532	hsa:5957	4	448	-0.0741893932139837	0.04	81.7776462953773	0.026	0.00818327594846201
1533	1533	hsa:5959	6	2190	0.000473139682516991	0.523	284.012940413024	0.199	0.339564146062912
1534	1534	hsa:5962	16	2691	-0.0121738684822083	0.287	408.765125777761	0.497	0.420419653971333
1535	1535	hsa:5966	5	1377	-0.0469445872614498	0.036	175.289804176051	0.000999000999000999	0.000403983696617667
1536	1536	hsa:5970	3	1695	-0.0250419850618309	0.145	208.09462915601	0.02	0.0198448291717702
1537	1537	hsa:5971	4	1567	-0.103035369004788	0.001	280.899568652899	0.002	2.82447267548086e-05
1538	1538	hsa:5973	6	1607	0.0260169137472103	0.882	350.157613467191	0.199	0.48092172060058
1539	1539	hsa:5976	6	2270	-0.026969770266144	0.051	344.480513035844	0.591	0.13569083075102
1540	1540	hsa:5978	3	53	0.0103927660346389	0.506	15.5562468984998	0.011	0.0344595435759794
1541	1541	hsa:5979	5	2313	-0.0208853082320763	0.121	252.77520326755	0.362	0.18081797621533
1542	1542	hsa:5993	5	1810	-0.000980981030252693	0.483	264.948810932549	0.042	0.0993572634663707
1543	1543	hsa:5994	4	746	0.0057149410858037	0.562	138.261594839104	0.183	0.336771546715099
1544	1544	hsa:5997	3	278	-0.0373463231537191	0.239	49.1803259915257	0.001	0.00223203223444183
1545	1545	hsa:5998	3	748	-0.00634219886630591	0.411	93.1158911325724	0.044	0.0906501678994982
1546	1546	hsa:6010	5	2223	-0.0344073061225379	0.026	395.930373706913	0.598	0.0802871241396461
1547	1547	hsa:6091	4	589	-0.0166516201088628	0.317	85.9769820971867	0.113	0.155077024200685
1548	1548	hsa:6093	2	318	-0.0484661716845999	0.14	41.9936633965721	0.564	0.279424744269342
1549	1549	hsa:6095	3	598	-0.0375914732122569	0.133	87.6430889033095	0.383	0.202590843755781
1550	1550	hsa:6096	4	647	0.0526831122154329	0.947	85.3580944382944	0.12	0.360775149207642
1551	1551	hsa:6117	18	2690	-0.0281009719515356	0.053	493.400618391419	0.477	0.118256988143235
1552	1552	hsa:6118	6	515	-0.00375259375133112	0.455	67.3706531282208	0.063	0.130485327697804
1553	1553	hsa:6119	18	2690	-0.0280357428054098	0.051	428.284192846509	0.451	0.109765776689543
1554	1554	hsa:6120	7	2435	-0.00119571325462108	0.482	494.397373745085	0.228	0.35257063468076
1555	1555	hsa:6121	5	1175	-0.0158153143107828	0.293	123.927816162156	0.317	0.31360676837667
1556	1556	hsa:6184	3	19	0.0611775290321498	0.634	4.22212467076383	0.019	0.0652775465330479
1557	1557	hsa:6185	3	19	0	0.535	5.36229339237317	0.000999000999000999	0.00456125891268704
1558	1558	hsa:6194	6	2378	-0.0266391331492574	0.051	294.930640913082	0.377	0.0952013318385256
1559	1559	hsa:6195	4	2037	-0.0172203235874152	0.167	425.301408558232	0.223	0.159776737179989
1560	1560	hsa:6196	4	2037	-0.0190863319056977	0.149	347.165858686109	0.191	0.129752857559424
1561	1561	hsa:6197	3	1285	-0.00338922246898665	0.447	251.826086956522	0.048	0.103884608435613
1562	1562	hsa:6198	5	2378	-0.0260195697790753	0.057	443.69431614307	0.393	0.107494551442713
1563	1563	hsa:6199	5	2378	-0.0267013351152772	0.052	360.559453372524	0.596	0.138659019132464
1564	1564	hsa:6237	4	2181	-0.0264347107423773	0.092	352.054586403023	0.273	0.117649627664802
1565	1565	hsa:6240	2	119	0.0462954592654693	0.707	19.3809978241783	0.257	0.491569166359433
1566	1566	hsa:6256	11	2653	-0.00233908757895844	0.478	385.675917089743	0.415	0.519257538320879
1567	1567	hsa:6257	5	2449	-0.00132184724286338	0.47	305.961560484025	0.255	0.374113491024494
1568	1568	hsa:6258	3	1232	-0.000441724622379646	0.509	133.25644157728	0.333	0.470340623957791
1569	1569	hsa:6261	3	640	-0.0353885878977303	0.121	106.768599457953	0.278	0.147741422753693
1570	1570	hsa:6262	2	247	-0.0386594964770077	0.234	34.513799289995	0.082	0.0950471861082285
1571	1571	hsa:6272	6	2340	-0.0247364165151966	0.119	277.381913959614	0.782	0.314027229035401
1572	1572	hsa:6296	7	2205	0.00708307245667241	0.675	328.37870748559	0.118	0.281173519775167
1573	1573	hsa:6300	4	2267	-0.0266141998441279	0.082	335.316639309845	0.38	0.139242201006644
1574	1574	hsa:6301	7	55	-0.127799652071487	0.101	9.828797190518	0.005	0.00433843082498791
1575	1575	hsa:6303	6	2172	-0.0130384913683666	0.245	332.445203649273	0.264	0.241793453839593
1576	1576	hsa:6307	2	7	-0.251976315339485	0.31	1.26819864870023	0.035	0.059930953659103
1577	1577	hsa:6319	3	315	-0.0112794546970841	0.396	38.1008512425087	0.019	0.0443137820333962
1578	1578	hsa:6323	2	222	-0.0914156580375338	0.06	40.215788067336	0.002	0.00120336225782187
1579	1579	hsa:6332	1	4	NA	1	1.38931938771615	0.025	0.117221986352848
1580	1580	hsa:6337	13	2673	-0.0147969708166608	0.238	470.419360995534	0.47	0.356890134227391
1581	1581	hsa:6338	4	1141	0.0110468306511484	0.679	229.297934878039	0.003	0.0146588165377192
1582	1582	hsa:6342	2	68	0.199744775498384	0.983	10.6078558613582	0.08	0.278611674519183
1583	1583	hsa:6344	3	361	-0.00380242781093196	0.451	92.4740237431767	0.004	0.0132012189386444
1584	1584	hsa:6346	4	1022	-0.0568943045338721	0.026	254.035920143528	0.021	0.00464803880389178
1585	1585	hsa:6347	3	243	-0.0957880015639902	0.049	48.5307477955491	0.000999000999000999	0.000534775023225925
1586	1586	hsa:6352	2	176	-0.100937212271948	0.056	45.6896972935832	0.000999000999000999	0.000603701167416069
1587	1587	hsa:6354	4	1022	-0.0620307465113923	0.018	205.74756651525	0.009	0.00157592210408257
1588	1588	hsa:6355	4	1022	-0.0583813323681361	0.02	154.902813299233	0.000999000999000999	0.000236179376318549
1589	1589	hsa:6356	2	52	0.0200552279198729	0.584	9.88891857846318	0.000999000999000999	0.00492789180826571
1590	1590	hsa:6357	3	452	-0.126645882950672	0.004	77.165476963011	0.465	0.0135541525517381
1591	1591	hsa:6361	4	1022	-0.0615846381611131	0.018	139.574416917968	0.06	0.00845725777687369
1592	1592	hsa:6362	3	243	-0.0949878631261048	0.052	49.3412986219796	0.005	0.00240625552100667
1593	1593	hsa:6363	3	452	-0.11721934690101	0.004	91.525632706035	0.000999000999000999	5.36671955931167e-05
1594	1594	hsa:6364	3	243	-0.106532717729879	0.034	32.2128869717907	0.002	0.000720528193989596
1595	1595	hsa:6366	3	452	-0.117516245674228	0.005	86.3038897583693	0.374	0.0136169975059763
1596	1596	hsa:6367	3	243	-0.0957880015639902	0.057	64.8191395961369	0.006	0.00307139933874837
1597	1597	hsa:6368	3	243	-0.0946449466527254	0.057	25.5823949307173	0.006	0.00307139933874837
1598	1598	hsa:6370	3	243	-0.103103552996085	0.041	39.3077451616597	0.229	0.0532188846030691
1599	1599	hsa:6372	4	1022	-0.0605251308292	0.019	123.615795701798	0.011	0.00197989384795389
1600	1600	hsa:6373	3	652	-0.0532609362277157	0.063	102.419666374012	0.005	0.00285482544452867
1601	1601	hsa:6376	3	243	-0.102989247504958	0.041	38.2969042256747	0.121	0.0312847999584353
1602	1602	hsa:6382	10	2649	-0.0198120778482883	0.181	336.623811886857	0.482	0.300031293698224
1603	1603	hsa:6383	4	1268	0.00568678118230788	0.595	197.995915562851	0.009	0.0333601750995664
1604	1604	hsa:6385	3	1034	0.0099226648360326	0.596	129.34519219758	0.032	0.0945882322210279
1605	1605	hsa:6387	3	452	-0.117998706180706	0.004	79.9422452952628	0.399	0.0118746466288074
1606	1606	hsa:6390	3	28	-0.109811521244836	0.252	5.2373172500668	0.001	0.00234009253055412
1607	1607	hsa:6396	22	2694	-0.0152921560008788	0.178	309.847196243845	0.524	0.314535133079608
1608	1608	hsa:6400	15	2655	-0.0286591085995302	0.048	335.751650952399	0.476	0.109188117397665
1609	1609	hsa:6401	3	357	-0.0402667740664325	0.175	55.45562468985	0.005	0.00703612583765583
1610	1610	hsa:6402	6	2091	-0.0288326645306238	0.074	433.424781463526	0.069	0.0320520927305915
1611	1611	hsa:6403	2	2	-1	0.442	0.84628010840936	0.007	0.0209720308900159
1612	1612	hsa:6404	6	2036	-0.0391778745189609	0.021	413.757682177348	0.092	0.0140054535174466
1613	1613	hsa:6405	9	2244	-0.020100139617027	0.141	292.121769668283	0.436	0.232939229488398
1614	1614	hsa:6419	7	2261	-0.0115975662240197	0.253	276.43585143337	0.199	0.200824931462459
1615	1615	hsa:6422	2	35	-0.215609866781891	0.068	5.48322326984006	0.021	0.0107835140327125
1616	1616	hsa:6424	2	35	-0.159363814577919	0.13	5.07443600412261	0.253	0.145195753891713
1617	1617	hsa:6426	2	12	-0.220192753025272	0.223	3.70656945451769	0.000999000999000999	0.00209618625171299
1618	1618	hsa:6427	2	12	-0.220192753025272	0.213	3.08878879260984	0.000999000999000999	0.00201194946165957
1619	1619	hsa:6428	2	12	-0.220192753025272	0.21	4.11302820933695	0.000999000999000999	0.00198658794284893
1620	1620	hsa:6430	4	152	-0.0295099589943911	0.326	24.31163873726	0.113	0.158448539733776
1621	1621	hsa:6431	2	12	-0.330289129537908	0.109	1.81413902355231	0.488	0.209249203979562
1622	1622	hsa:6432	2	12	-0.220192753025272	0.216	3.92319731266939	0.000999000999000999	0.00203726876776469
1623	1623	hsa:6446	5	2385	-0.0263356879987095	0.056	398.920181700195	0.347	0.096010287984069
1624	1624	hsa:6448	3	19	-0.587087047901807	0.000999000999000999	2.01824636408749	0.753	0.00616274820915544
1625	1625	hsa:6452	3	687	-0.0668127964018225	0.046	85.060541283353	0.862	0.167633345998457
1626	1626	hsa:6455	3	908	0.00433265971935416	0.557	172.66465625835	0.000999000999000999	0.00472640086296917
1627	1627	hsa:6456	3	908	0.00441116770973884	0.555	120.522502576631	0.089	0.197970520549221
1628	1628	hsa:6457	3	908	0.0105446044585414	0.641	194.300797801275	0.085	0.213027079080486
1629	1629	hsa:6464	2	369	-0.0453606529234667	0.152	62.2167042027713	0.005	0.00621846601475977
1630	1630	hsa:6470	4	461	-0.0291105615309665	0.192	82.5852960262625	0.518	0.329004420638341
1631	1631	hsa:6476	14	2689	0.00171298380326184	0.553	243.111844867733	0.568	0.677846212482651
1632	1632	hsa:6477	12	2668	-0.0222494194942426	0.101	351.267053479406	0.462	0.189672871151226
1633	1633	hsa:6480	4	193	-0.00812764744791758	0.448	22.44379127381	0.375	0.467676938329252
1634	1634	hsa:6482	5	1558	0.0210308625674262	0.839	213.729396495782	0.053	0.182893123976598
1635	1635	hsa:6483	2	44	-0.0714436710104817	0.28	7.32694583349238	0.471	0.399050794079483
1636	1636	hsa:6484	3	37	-0.111024603526618	0.209	6.69141504752452	0.054	0.0618945938399855
1637	1637	hsa:6494	5	2173	-0.0307486954625734	0.052	317.394358132611	0.062	0.0217205150327849
1638	1638	hsa:6500	2	102	-0.0471217015179142	0.283	16.0952780852769	0.001	0.00259512801587086
1639	1639	hsa:6502	15	2693	-0.017599282238779	0.137	554.473985570867	0.473	0.242124675422389
1640	1640	hsa:6504	5	1946	-0.0312311621303838	0.075	434.431079894644	0.056	0.0271852171655098
1641	1641	hsa:6513	4	1867	0.00687694554673775	0.646	316.576096499599	0.006	0.0253992403432802
1642	1642	hsa:6514	2	178	-0.101686282759863	0.066	23.2116654578769	0.276	0.0911793673732202
1643	1643	hsa:6518	5	2238	-0.0246248905075722	0.056	376.129480474863	0.425	0.112766058819652
1644	1644	hsa:6531	4	2009	-0.0245761012938056	0.078	384.518112761003	0.205	0.082121310116659
1645	1645	hsa:6541	2	1	NA	1	0.513455739206779	0.006	0.0366959748585245
1646	1646	hsa:6548	2	217	-0.0359525413036406	0.267	38.5907928388747	0.043	0.0627673363406168
1647	1647	hsa:6554	4	152	-0.0154635391301413	0.415	33.6985914417681	0.106	0.18140565158991
1648	1648	hsa:6558	1	6	NA	1	0.945375424666946	0.078	0.276981623278819
1649	1649	hsa:6579	7	2255	-0.0239637216516164	0.107	331.018857121044	0.404	0.179018683199056
1650	1650	hsa:6591	4	2000	0.0101560583839172	0.705	347.796732450281	0.199	0.415835492599328
1651	1651	hsa:6608	3	36	-0.0596582333072379	0.353	5.95793411459327	0.092	0.143779498435237
1652	1652	hsa:6609	2	41	-0.0576709836081594	0.329	6.45478489903424	0.308	0.333316720650801
1653	1653	hsa:6610	5	1647	-0.0232535343204412	0.163	235.571286788564	0.246	0.169070362873486
1654	1654	hsa:6611	3	61	-0.149383256814849	0.083	9.30534030614192	0.114	0.0535593813497778
1655	1655	hsa:6613	7	2411	-0.019792629053077	0.133	389.072069320915	0.31	0.172695529923217
1656	1656	hsa:6616	2	9	-0.0785674201318386	0.43	1.55815551399015	0.083	0.154640656423424
1657	1657	hsa:6647	12	2655	-0.0297403264333895	0.043	340.556590449288	0.559	0.113650805214632
1658	1658	hsa:6648	3	540	-0.0454072986040351	0.091	94.7680650456159	0.197	0.0900194861542121
1659	1659	hsa:6652	14	2689	-0.00307991566956663	0.419	439.618925831202	0.529	0.555601746501854
1660	1660	hsa:6654	2	266	-0.0544184169984724	0.127	45.433522922472	0.117	0.0774027529659431
1661	1661	hsa:6655	3	1233	0.0305736066382539	0.899	205.591174561973	0.006	0.0335639926847032
1662	1662	hsa:6657	2	64	0.0955113758435421	0.811	10.8693361835325	0.037	0.135221282008278
1663	1663	hsa:6659	7	2260	-0.0202695466184598	0.159	412.076459136542	0.127	0.0989945523046811
1664	1664	hsa:6667	5	2192	-0.0079671806021184	0.327	353.833988624652	0.167	0.213387756985076
1665	1665	hsa:6675	1	2	NA	1	0.377485971676146	0.096	0.320967080401373
1666	1666	hsa:6677	4	20	-0.450034595339972	0.004	2.71462381188686	0.958	0.0251546597811233
1667	1667	hsa:6688	3	827	-0.0078152224593827	0.401	191.676107951292	0.000999000999000999	0.00353430769333397
1668	1668	hsa:6696	5	2258	-0.0263659732409521	0.097	319.145131121884	0.353	0.149781485662867
1669	1669	hsa:6709	4	486	0.0229243701086117	0.737	65.7493606138107	0.015	0.060856365096957
1670	1670	hsa:6713	3	8	0.137504774554232	0.698	1.76336985150971	0.085	0.226915902989558
1671	1671	hsa:6714	4	2208	-0.033719541603049	0.059	224.394778028018	0.419	0.116191226341246
1672	1672	hsa:6715	4	1232	0.00836470825088888	0.659	164.963392754896	0.179	0.370090985031792
1673	1673	hsa:6718	3	344	0.0199990767017012	0.686	64.284612741917	0.049	0.147660003816343
1674	1674	hsa:6720	1	12	NA	1	1.99519028896438	0.043	0.178301872021409
1675	1675	hsa:6722	5	2227	-0.0371820079538803	0.035	243.479749589648	0.395	0.073013650814007
1676	1676	hsa:6723	3	89	0	0.493	11.9435431537962	0.062	0.137176142687659
1677	1677	hsa:6732	3	12	0.436931448752651	0.958	4.25537275260526	0.000999000999000999	0.00761008238217062
1678	1678	hsa:6750	3	104	-0.139534324358104	0.036	11.3334732984693	0.279	0.0562542326897262
1679	1679	hsa:6752	2	104	-0.144839021145212	0.035	13.6749627819979	0.059	0.0148321207335553
1680	1680	hsa:6770	4	1820	0.00480659869751518	0.59	260.34519219758	0.011	0.0391833279362473
1681	1681	hsa:6772	1	57	NA	1	8.94548994159636	0.000999000999000999	0.00790085392538984
1682	1682	hsa:6773	2	264	-0.0176943631810276	0.345	44.9282742298736	0.057	0.0969271109794794
1683	1683	hsa:6774	2	561	-0.0199095506937101	0.281	89.964690613429	0.036	0.0565852313879644
1684	1684	hsa:6775	5	2375	-0.0222173914564285	0.116	566.71011947933	0.334	0.164692196061654
1685	1685	hsa:6776	2	358	0.000561197597911161	0.504	62.5259380845135	0.12	0.230153165249265
1686	1686	hsa:6777	2	358	0.000350748498694475	0.503	69.0063366034279	0.08	0.169526844628392
1687	1687	hsa:6778	2	220	-0.072709122636715	0.103	33.2223155323129	0.045	0.0295440419356346
1688	1688	hsa:6783	5	2151	0.012385842105528	0.748	239.840477917319	0.231	0.476150141165637
1689	1689	hsa:6788	5	2244	-0.0211368186599135	0.118	311.09852273161	0.324	0.163024398993747
1690	1690	hsa:6789	5	2349	-0.0258283329151288	0.054	273.125052486926	0.171	0.052494024525522
1691	1691	hsa:6790	3	30	-0.2085816009169	0.138	7.91174561972745	0.000999000999000999	0.00136335402546787
1692	1692	hsa:6794	6	2512	-0.0205612138241147	0.107	574.68843760736	0.356	0.162567170812037
1693	1693	hsa:6804	2	21	0.0557657184542019	0.636	6.0501965873955	0.022	0.0737276194213916
1694	1694	hsa:6809	2	15	-0.106242543051946	0.349	2.08294842920945	0.355	0.382627511250657
1695	1695	hsa:6812	6	2067	-0.0146790916368318	0.199	337.255258235676	0.163	0.14364581210553
1696	1696	hsa:6820	2	91	-0.00812061387715474	0.475	22.0832156353781	0.104	0.19798555982654
1697	1697	hsa:6821	5	2013	0.00268937671525814	0.551	282.916211779975	0.088	0.195233971047946
1698	1698	hsa:6822	4	948	-0.0208530286666412	0.259	182.279230446234	0.103	0.123353207733852
1699	1699	hsa:6833	1	9	NA	1	2.15081879604535	0.025	0.117221986352848
1700	1700	hsa:6839	2	12	-0.497468338163091	0.05	1.82272779325877	0.338	0.0858594640041976
1701	1701	hsa:6843	3	21	-0.21460530538692	0.107	5.001183341604	0.003	0.0029031462885818
1702	1702	hsa:6844	2	143	-0.0450310805632766	0.252	33.0519906859564	0.016	0.0262624027607951
1703	1703	hsa:6850	2	344	-0.0563802981628398	0.161	36.315188762072	0.139	0.107410970343163
1704	1704	hsa:6865	2	67	-0.138027515992277	0.093	12.5641485666298	0.003	0.00256241935854387
1705	1705	hsa:6869	2	67	-0.13429704258708	0.095	15.1337939458717	0.004	0.00337262893599266
1706	1706	hsa:6870	2	67	-0.13429704258708	0.098	13.8053593922968	0.000999000999000999	0.00100168948332011
1707	1707	hsa:6880	14	2373	-0.0268845415653997	0.047	332.096003359163	0.395	0.0925739490574702
1708	1708	hsa:6885	6	2535	-0.0284937760420299	0.062	417.285452532733	0.501	0.138902121971318
1709	1709	hsa:6888	15	2693	-0.00973392185918971	0.289	305.59564072222	0.527	0.43891947548555
1710	1710	hsa:6890	6	557	-0.0664784224930239	0.085	94.5115471237164	0.000999000999000999	0.000880897101052547
1711	1711	hsa:6891	6	557	-0.0630828765715925	0.097	95.4163072107493	0.001	0.000993357559207708
1712	1712	hsa:6892	5	557	-0.0546080194406621	0.142	108.124632591518	0.000999000999000999	0.00139881816793092
1713	1713	hsa:6898	6	2460	-0.0180004574883034	0.118	258.434095507119	0.429	0.201646106255593
1714	1714	hsa:6900	13	2647	-0.0226157112820523	0.133	434.674122991182	0.491	0.24349642596911
1715	1715	hsa:6907	16	2693	-0.00432690147317134	0.418	300.864335610948	0.458	0.507931551807087
1716	1716	hsa:6908	5	2219	-0.0334994753834454	0.037	230.614116120166	0.411	0.0788634933445378
1717	1717	hsa:6915	2	77	-0.178668850778046	0.026	14.553842042982	0.24	0.037919076602789
1718	1718	hsa:6916	5	2183	-0.0298714937335554	0.044	393.078367752033	0.148	0.0392941155306357
1719	1719	hsa:6921	2	67	-0.141757989397473	0.1	11.2481581860518	0.087	0.0499765606038979
1720	1720	hsa:6928	4	187	0.0433743888131269	0.8	37.1358552506012	0.055	0.181436888382811
1721	1721	hsa:6932	10	2634	-0.000938129935672317	0.505	472.062068175745	0.34	0.474236517952214
1722	1722	hsa:6934	4	2037	0.00258788556570967	0.576	293.675688055884	0.139	0.28221991258472
1723	1723	hsa:6935	19	2694	-0.0239336066510894	0.096	493.295453677902	0.476	0.186702181232462
1724	1724	hsa:6999	5	1756	-0.00726949672217802	0.368	324.895178837271	0.182	0.248040320389758
1725	1725	hsa:7003	2	123	-0.0858585033377499	0.121	15.4989884337901	0.426	0.204394357214696
1726	1726	hsa:7004	2	123	-0.0858585033377499	0.122	17.3408405542619	0.661	0.283677240172656
1727	1727	hsa:7006	4	1714	-0.0316846563337959	0.115	209.760545100584	0.055	0.0383500261706311
1728	1728	hsa:7018	6	2532	-0.0102213244900861	0.276	571.641676527847	0.367	0.333225138633952
1729	1729	hsa:7023	5	2248	-0.0147830604089382	0.193	469.919647287857	0.132	0.118973389942347
1730	1730	hsa:7029	2	80	-0.0861122913359306	0.2	14.9840439745009	0.034	0.0407376621342405
1731	1731	hsa:7035	5	612	-0.011900549321716	0.365	122.105470091995	0.003	0.00855961600270647
1732	1732	hsa:7038	5	2285	0.0042629278001704	0.614	528.098446386991	0.298	0.493735696406033
1733	1733	hsa:7039	11	2651	-0.0022274139402303	0.478	302.385654845975	0.464	0.555814139483902
1734	1734	hsa:7040	2	239	-0.0716391048815441	0.099	48.6227430621827	0.132	0.0697516102455596
1735	1735	hsa:7042	3	1161	0.0225600362085678	0.808	155.036111005077	0.057	0.187811634898967
1736	1736	hsa:7044	6	2364	-0.0178893041541043	0.147	434.97240142001	0.353	0.205416227060463
1737	1737	hsa:7046	2	130	-0.0304859699377746	0.327	15.1512386914532	0.358	0.368174607026403
1738	1738	hsa:7048	4	1819	-0.0136406554351512	0.243	342.480169485056	0.088	0.103607881426312
1739	1739	hsa:7054	3	914	-0.0369803915463827	0.097	154.980074054281	0.06	0.0357723682003298
1740	1740	hsa:7056	4	612	-0.011010502667057	0.37	134.246096881322	0.000999000999000999	0.00329082178769617
1741	1741	hsa:7057	2	254	0.0427793792743367	0.789	49.3453830591289	0.000999000999000999	0.00642057123761161
1742	1742	hsa:7059	3	831	-0.0218051468101371	0.259	119.31549414055	0.035	0.0517007266512383
1743	1743	hsa:7060	3	831	-0.0182148490361239	0.295	143.6706874833	0.038	0.0615535387596773
1744	1744	hsa:7067	4	2053	-0.0250819923589383	0.099	334.913463373669	0.357	0.153482453051387
1745	1745	hsa:7068	4	2150	-0.0270684106600714	0.094	382.3254189411	0.462	0.179646474616953
1746	1746	hsa:7070	3	428	-0.059860448223043	0.064	64.7560789403367	0.000999000999000999	0.000681406719676336
1747	1747	hsa:7074	3	1250	-0.0221003102289914	0.182	150.702370500439	0.086	0.0807198147061709
1748	1748	hsa:7076	15	2693	-0.0109714810006123	0.284	302.9466732832	0.498	0.418063974688637
1749	1749	hsa:7078	3	717	-0.0255311312621225	0.23	120.205252509829	0.002	0.00399477067150132
1750	1750	hsa:7082	4	2116	-0.0257616554150308	0.085	367.495896476696	0.326	0.127077004806172
1751	1751	hsa:7083	2	110	0.00240495956143196	0.529	21.4650150780624	0.105	0.216101253845057
1752	1752	hsa:7084	3	242	-0.0685424950107722	0.105	22.4386761842959	0.971	0.334741076362295
1753	1753	hsa:7086	1	16	NA	1	2.59296866053365	0.07	0.256148202585295
1754	1754	hsa:7094	3	668	-0.0108400461592906	0.387	94.4001603237012	0.006	0.0164056878908303
1755	1755	hsa:7096	3	371	0.0817222617886955	0.958	83.9110203458411	0.000999000999000999	0.00761008238217062
1756	1756	hsa:7097	2	282	0.009240973399742	0.585	63.0107264190556	0.000999000999000999	0.00493533012334997
1757	1757	hsa:7099	2	438	-0.0448197807382945	0.144	82.7878383020957	0.189	0.125301109822432
1758	1758	hsa:7100	6	2474	-0.0352869531019883	0.043	398.868687254266	0.31	0.070885449470071
1759	1759	hsa:7108	2	7	-0.755928946018455	0.037	0.941939916784365	0.437	0.0828606186506792
1760	1760	hsa:7124	3	1318	0.00733921675261646	0.617	193.187197007291	0.004	0.0172867288228134
1761	1761	hsa:7128	3	772	0.00481723102158388	0.565	165.167881818529	0.000999000999000999	0.00478623540943084
1762	1762	hsa:7132	2	210	-0.0293316932475655	0.319	38.57395885025	0.001	0.00288705190620224
1763	1763	hsa:7133	3	620	-0.0224705249280154	0.261	145.978012749551	0.000999000999000999	0.00241235694196243
1764	1764	hsa:7134	3	178	-0.104993379111821	0.057	31.7260755048288	0.501	0.130101499519554
1765	1765	hsa:7139	5	2023	-0.0171170782001339	0.183	291.526777875329	0.21	0.163670175483399
1766	1766	hsa:7143	6	2456	-0.0212244590032295	0.147	441.200595488033	0.32	0.190829848122429
1767	1767	hsa:7156	9	2566	-0.0242833954562475	0.07	407.951215788067	0.358	0.117443247177626
1768	1768	hsa:7157	3	1553	0.0113223685128473	0.679	190.566629766767	0.015	0.0569019575504548
1769	1769	hsa:7159	16	2694	-0.0120610486248363	0.277	467.779478566248	0.494	0.409002971118091
1770	1770	hsa:7161	2	50	-0.16734693877551	0.123	8.668244455472	0.158	0.0960181695493241
1771	1771	hsa:7166	17	2694	-0.000170160773720417	0.515	239.012215139138	0.554	0.643139802088549
1772	1772	hsa:7168	2	33	-0.143701248692749	0.209	6.35542237660801	0.029	0.0370077415651147
1773	1773	hsa:7169	4	1045	0.0223923331560801	0.788	153.019887773409	0.02	0.0811684158661459
1774	1774	hsa:7170	3	850	-0.0307335755697971	0.126	96.3645073863419	0.737	0.313561614145864
1775	1775	hsa:7172	2	95	-0.0894218041648056	0.132	15.5179982440737	0.388	0.203414755995369
1776	1776	hsa:7175	3	786	-0.0416606869047507	0.059	167.140283238539	0.165	0.0548277890769379
1777	1777	hsa:7185	2	303	-0.0409803551084905	0.201	74.6427835248311	0.002	0.0035452615046768
1778	1778	hsa:7186	4	2094	-0.0469565335221622	0.042	483.853418330343	0.247	0.0577671273040711
1779	1779	hsa:7187	2	328	-0.059149032971164	0.101	41.3109134633737	0.002	0.00192046305783374
1780	1780	hsa:7188	4	1994	-0.0506036054667368	0.018	372.618086040386	0.548	0.0554244696934166
1781	1781	hsa:7189	4	2104	-0.0319889219265883	0.073	231.873955033019	0.765	0.21696761367854
1782	1782	hsa:7201	2	67	-0.138027515992277	0.093	10.9996564492117	0.004	0.0033095414137731
1783	1783	hsa:7205	6	2386	-0.0219461959232483	0.139	299.259991602092	0.433	0.229330459703573
1784	1784	hsa:7220	13	2668	-0.0123825188765534	0.273	389.557811963202	0.472	0.392889646650079
1785	1785	hsa:7248	10	2649	-0.0257806139969858	0.067	315.938084513494	0.391	0.121609365587868
1786	1786	hsa:7249	1	13	NA	1	2.60117570714204	0.058	0.223144111569272
1787	1787	hsa:7252	3	105	0.029302988659511	0.615	13.1809749207925	0.187	0.363735476328231
1788	1788	hsa:7253	13	2669	0.00238833382203703	0.558	278.791197465359	0.468	0.611777687607799
1789	1789	hsa:7263	13	2666	-0.0176638598823054	0.146	320.872275451388	0.499	0.263680324872109
1790	1790	hsa:7264	17	2688	-0.00770642172636932	0.306	375.000954307745	0.514	0.448212559339524
1791	1791	hsa:7270	16	2694	-0.00648949644183628	0.393	333.000992480055	0.504	0.518775263225499
1792	1792	hsa:7272	3	19	-0.237924750991785	0.125	5.39050272932015	0.000999000999000999	0.00124727726286152
1793	1793	hsa:7291	2	47	-0.152470966838256	0.16	10.5392602206359	0.000999000999000999	0.00155705674214802
1794	1794	hsa:7294	4	1801	-0.0563843716419274	0.006	267.60942092606	0.099	0.00500660695572937
1795	1795	hsa:7296	2	14	-0.640703215615944	0.004	2.7974958964767	0.359	0.0108359035087994
1796	1796	hsa:7297	5	2386	-0.0330459734575291	0.067	272.230522578921	0.486	0.144074128504376
1797	1797	hsa:7298	2	125	0.0357310128138747	0.645	27.182043745467	0.004	0.0179567119705254
1798	1798	hsa:7305	2	73	-0.103674974383249	0.154	22.2202160552735	0.000999000999000999	0.00150454730090519
1799	1799	hsa:7306	1	2	NA	1	0.605832728938428	0.075	0.269270037408437
1800	1800	hsa:7307	5	2025	-0.0264739361620863	0.089	275.337634080238	0.603	0.210640666863096
1801	1801	hsa:7321	12	2667	-0.0193640700126014	0.113	437.481925411307	0.476	0.210994450355484
1802	1802	hsa:7322	7	2547	-0.0319846104808742	0.034	349.377638660915	0.41	0.0735055206586777
1803	1803	hsa:7323	3	174	-0.0199910106921897	0.365	23.7897850898958	0.023	0.0485240989080598
1804	1804	hsa:7324	15	2689	-0.0194143033783435	0.11	441.614383326335	0.531	0.224310063864017
1805	1805	hsa:7326	8	2242	-0.0286044665066177	0.047	362.776348436844	0.545	0.119483143994153
1806	1806	hsa:7329	12	2655	-0.0206932507911202	0.125	334.853456502653	0.501	0.236133243813516
1807	1807	hsa:7341	17	2694	-0.0209647517020695	0.132	434.851395197923	0.485	0.239982794839076
1808	1808	hsa:7353	16	2649	-0.029083404806488	0.048	356.303622552201	0.5	0.113512834767221
1809	1809	hsa:7358	5	2184	0.0265338470852907	0.931	360.933389319388	0.287	0.619835334841456
1810	1810	hsa:7360	3	331	0.103326191079818	0.989	41.289155246784	0.145	0.421909338606689
1811	1811	hsa:7368	2	48	-0.147376586186641	0.11	4.77638660915372	0.892	0.325911865527152
1812	1812	hsa:7371	2	101	-0.0471780314300341	0.272	20.7400083979082	0.002	0.00463300935324293
1813	1813	hsa:7372	2	134	0.0205666303306862	0.587	25.239645760965	0.14	0.287534943669998
1814	1814	hsa:7389	5	19	-0.0804843636585534	0.331	2.75684238653281	0.356	0.369823743626667
1815	1815	hsa:7390	7	333	0.0284801248555551	0.743	40.277321830744	0.001	0.00609617718334216
1816	1816	hsa:7398	6	572	-0.0335050777016711	0.171	89.7057296637019	0.013	0.0158030794626122
1817	1817	hsa:7408	3	1134	0.0274598656638588	0.845	159.241248997977	0.01	0.0487868256778303
1818	1818	hsa:7409	3	1263	-0.0469666695904312	0.084	255.081268847578	0.000999000999000999	0.000871526707087053
1819	1819	hsa:7410	3	1303	-0.0351973158252359	0.145	203.199984731076	0.151	0.105566676349267
1820	1820	hsa:7412	2	318	-0.0250982791703323	0.3	67.1144405847998	0.003	0.00721180421517597
1821	1821	hsa:7414	3	643	-0.0520878228952443	0.048	89.1087529106386	0.007	0.00302346219772836
1822	1822	hsa:7416	2	19	NA	1	4.15085696835515	0.001	0.00790775527898214
1823	1823	hsa:7419	2	57	-0.268188545166015	0.003	6.76363705767836	0.674	0.0145658170162522
1824	1824	hsa:7421	5	2158	-0.0324419394846269	0.058	380.266519067069	0.116	0.0403779396532637
1825	1825	hsa:7422	2	413	-0.0431002446001477	0.176	59.3080505401382	0.366	0.241070002273067
1826	1826	hsa:7423	2	316	-0.0631846995191687	0.095	42.3203420238959	0.689	0.243911014237639
1827	1827	hsa:7424	2	316	-0.0618425408692517	0.102	46.6225522006337	0.264	0.124261642939219
1828	1828	hsa:7430	2	284	0.00992682127972764	0.563	35.9422452952628	0.001	0.00477549601349124
1829	1829	hsa:7431	8	2532	-0.0271624132003714	0.083	440.571744856281	0.529	0.18114629842441
1830	1830	hsa:7450	2	136	0.0567722306179142	0.774	21.346948123831	0.038	0.133129080454952
1831	1831	hsa:7454	2	185	-0.0714840942075115	0.132	45.0451960148108	0.072	0.053755028075503
1832	1832	hsa:7465	3	117	0.0121646428950491	0.557	23.2546474787189	0.005	0.0191705681246041
1833	1833	hsa:7472	3	434	0.0642968568065744	0.942	74.6302248349048	0.013	0.0661596998688944
1834	1834	hsa:7474	2	52	-0.0890322027519951	0.198	9.86074741382601	0.184	0.157105996664281
1835	1835	hsa:7475	2	52	-0.0890322027519951	0.21	8.38760163377486	0.277	0.223627905760029
1836	1836	hsa:7476	2	52	-0.0670790568679415	0.272	6.93545062411726	0.174	0.191709314292451
1837	1837	hsa:7479	2	52	-0.0865929643204335	0.208	9.60693972592281	0.049	0.0569340630201125
1838	1838	hsa:7480	3	434	0.065896849688359	0.94	100.457227926862	0.023	0.104514030411591
1839	1839	hsa:7481	2	52	-0.069518295299503	0.265	8.10314158109707	0.002	0.0045275957822516
1840	1840	hsa:7482	2	52	-0.084153725888872	0.225	6.96041531473069	0.173	0.165280164997126
1841	1841	hsa:7498	2	85	-0.0652725378829464	0.225	18.3047677214948	0.048	0.0597046587644012
1842	1842	hsa:7514	4	37	-0.123046490271457	0.166	9.37069130053059	0.002	0.00299144469556387
1843	1843	hsa:7525	3	458	-0.0110053693038973	0.388	79.7085925869374	0.003	0.00902785937013925
1844	1844	hsa:7529	3	904	-0.0217870886046035	0.24	102.27419170134	0.181	0.179684112769804
1845	1845	hsa:7533	5	2357	-0.00515114572922673	0.402	347.770698934992	0.19	0.272831987256973
1846	1846	hsa:7534	14	2693	-0.0178493495064638	0.152	339.055426193839	0.467	0.258758030528415
1847	1847	hsa:7535	1	23	NA	1	8.10386685498339	0.000999000999000999	0.00790085392538984
1848	1848	hsa:7704	16	2693	-0.023271571529469	0.097	484.300530595106	0.507	0.197320339872697
1849	1849	hsa:7706	6	2228	-0.0427367563249663	0.038	438.038248654426	0.115	0.0281121762193522
1850	1850	hsa:7709	3	571	0.00867609020715499	0.594	88.2525098293698	0.099	0.225433470710193
1851	1851	hsa:7786	6	2311	-0.0336074191565633	0.038	347.821697140894	0.693	0.12210797710453
1852	1852	hsa:7791	3	416	-0.0306601863143531	0.218	62.412031912051	0.073	0.0818068090437824
1853	1853	hsa:7832	7	565	0.00649388838806351	0.496	87.5189525518189	0.047	0.110936843232387
1854	1854	hsa:7841	3	17	-0.0884436422096531	0.303	3.71149368248273	0.000999000999000999	0.00275538612147329
1855	1855	hsa:7849	4	2126	-0.00564941252707694	0.387	363.187082490361	0.312	0.376006798766782
1856	1856	hsa:7850	5	2294	-0.0365138066667163	0.043	232.771347864259	0.648	0.127628815800271
1857	1857	hsa:7852	3	985	-0.0604879575722674	0.023	121.301217696683	0.001	0.000268640375866808
1858	1858	hsa:7855	16	2694	0.000611885522152937	0.546	470.385693018284	0.475	0.609362737422209
1859	1859	hsa:7867	5	2342	-0.0273104599352156	0.06	363.923273657289	0.323	0.0958052949734282
1860	1860	hsa:7869	14	2647	-0.0218459175956667	0.143	353.194755124633	0.414	0.226554210869548
1861	1861	hsa:7874	12	2668	-0.033258976940186	0.052	341.26827499332	0.443	0.109897777689264
1862	1862	hsa:7879	6	2323	-0.0130668101040628	0.218	352.205977783716	0.305	0.246724690247571
1863	1863	hsa:7915	3	94	-0.0660559551281801	0.217	12.5240294690232	0.879	0.506771401712248
1864	1864	hsa:7923	2	78	-0.0573827992148067	0.313	14.8726571744856	0.077	0.113889322390193
1865	1865	hsa:7941	4	1613	0.0346299620369831	0.952	270.924724205062	0.019	0.090666218367989
1866	1866	hsa:7976	4	1986	0.0340857426350704	0.959	295.825056304157	0.211	0.525654411331175
1867	1867	hsa:7991	12	903	-0.027810728297359	0.152	126.137573004542	0.345	0.207037609917343
1868	1868	hsa:8021	10	2374	-0.0251847777044911	0.055	342.12230408062	0.364	0.0983186905720031
1869	1869	hsa:8027	3	443	-0.071251801476522	0.039	82.5839218231095	0.016	0.00522872075830719
1870	1870	hsa:8030	3	786	-0.0349366624516361	0.102	121.889185784632	0.769	0.278097754151126
1871	1871	hsa:8031	3	786	-0.0433119406974403	0.051	91.8108180325991	0.08	0.0265267658255095
1872	1872	hsa:8087	3	100	-0.0881230861777734	0.14	18.3842042982021	0.069	0.0544800973531195
1873	1873	hsa:8091	3	227	-0.0198371692229512	0.345	45.6127037447036	0.212	0.264428883418322
1874	1874	hsa:8174	6	2380	-0.0312317967151841	0.064	413.07691720426	0.385	0.115891385217406
1875	1875	hsa:8189	13	2278	-0.0205205861812165	0.116	276.95850669924	0.525	0.231329996149817
1876	1876	hsa:8202	4	1763	0.0190962720960567	0.817	302.705347940604	0.053	0.179247934075158
1877	1877	hsa:8218	3	53	-0.0418601769799593	0.316	10.5988471962438	0.036	0.0622978132417602
1878	1878	hsa:8228	2	48	-0.225808183119664	0.038	7.51467725312059	0.126	0.0303637842482793
1879	1879	hsa:8243	11	2638	-0.032513623984472	0.023	473.052677787533	0.5	0.0628521948015487
1880	1880	hsa:8277	6	2435	-0.00304356663833053	0.432	385.567774936061	0.303	0.397053664886536
1881	1881	hsa:8309	6	2451	-0.00368609108257137	0.436	379.980875672787	0.222	0.322819800762057
1882	1882	hsa:8312	7	2576	0.00811846328394695	0.696	373.022979730503	0.325	0.562409138800887
1883	1883	hsa:8317	5	46	-0.407632011558325	0.003	14.9708745276177	0.000999000999000999	4.11125807281596e-05
1884	1884	hsa:8318	5	46	-0.405068288215191	0.004	13.5367790204985	0.000999000999000999	5.36671955931167e-05
1885	1885	hsa:8322	2	279	0.0601038930172992	0.886	44.1934572660992	0.209	0.497462424675799
1886	1886	hsa:8323	15	2690	-0.000338857138357781	0.532	341.925449478948	0.495	0.614717012656244
1887	1887	hsa:8324	1	22	NA	1	4.36049929381227	0.019	0.0943030096964982
1888	1888	hsa:8332	6	2403	-0.01975557817451	0.149	423.022712524335	0.394	0.225150034497772
1889	1889	hsa:8334	2	33	0.136211568782751	0.807	6.83311066152613	0.000999000999000999	0.00654886255419793
1890	1890	hsa:8344	3	187	-0.00937614370290732	0.435	27.4398976982097	0.000999000999000999	0.00379860774409168
1891	1891	hsa:8345	3	187	-0.00895942620500033	0.439	30.311447875711	0.000999000999000999	0.00382952315010244
1892	1892	hsa:8346	2	33	0.136211568782751	0.803	7.60277894415391	0.000999000999000999	0.00652038835316037
1893	1893	hsa:8349	3	187	-0.0143767536777912	0.412	24.5630797419552	0.000999000999000999	0.00362012040368283
1894	1894	hsa:8379	2	19	-0.242830932128591	0.121	3.80921479558728	0.071	0.0494587318025875
1895	1895	hsa:8382	3	607	-0.0499594986339386	0.082	72.7654693285491	0.809	0.246312489409392
1896	1896	hsa:8394	4	1985	-0.0352120857496859	0.043	310.145703706531	0.228	0.0551471550297527
1897	1897	hsa:8396	4	1959	-0.0355990069256688	0.034	362.193953506127	0.349	0.0644807708668547
1898	1898	hsa:8399	2	347	-0.0509206733621753	0.137	58.7025995342978	0.079	0.059808783101359
1899	1899	hsa:8408	5	2209	-0.0397554352304682	0.019	248.446119784708	0.397	0.0444066615536486
1900	1900	hsa:8411	7	2398	-0.0151009604157123	0.187	344.965148681147	0.286	0.210099230588161
1901	1901	hsa:8424	3	145	-0.0100630042607775	0.449	19.3269458334924	0.057	0.119402513846303
1902	1902	hsa:8431	6	2255	-0.0236737181807387	0.11	454.242355994961	0.368	0.170297224842039
1903	1903	hsa:8434	2	10	NA	1	3.01973508416994	0.009	0.0513947763148133
1904	1904	hsa:8443	3	12	-0.260578653323524	0.181	0.879795396419437	0.979	0.483838659392674
1905	1905	hsa:8453	6	2499	-0.0201441842498625	0.12	461.22284994465	0.504	0.230153165249265
1906	1906	hsa:8454	15	2694	-0.0169564890109245	0.138	437.823567584074	0.532	0.265150208160498
1907	1907	hsa:8458	16	2694	-0.00544058556965262	0.422	449.017521090201	0.498	0.537979430255795
1908	1908	hsa:8480	7	122	-0.0204332301439842	0.386	22.625644157728	0.044	0.0862020126910068
1909	1909	hsa:8491	4	1479	-0.0440281876289153	0.028	299.36488910944	0.045	0.00967257088310363
1910	1910	hsa:8493	6	2474	-0.0232475650536559	0.077	419.470435546055	0.391	0.135571748024402
1911	1911	hsa:8503	3	1777	-0.0518019028322711	0.01	306.885063175173	0.204	0.0146774031610971
1912	1912	hsa:8513	1	20	NA	1	3.89452990800473	0.031	0.138686810309407
1913	1913	hsa:8516	5	2294	-0.0272422675191374	0.084	418.835706378593	0.743	0.235542745351333
1914	1914	hsa:8527	3	907	-0.0417707410189277	0.071	207.012520517616	0.195	0.0730992618890633
1915	1915	hsa:8528	13	2661	-0.0100669814420713	0.274	428.922204832614	0.352	0.322015883065537
1916	1916	hsa:8553	5	1636	-0.0111482472837702	0.281	225.06504561591	0.159	0.183552577097126
1917	1917	hsa:8554	2	92	-0.160310668932109	0.029	12.8263541626904	0.594	0.0871865637488046
1918	1918	hsa:8555	5	1514	-0.0651984838136353	0.003	347.333511470779	0.076	0.00214004560381424
1919	1919	hsa:8556	5	1514	-0.0648181525812608	0.003	190.656067488644	0.837	0.0175445433132036
1920	1920	hsa:8560	2	41	-0.0366076944281227	0.376	5.66339657212658	0.058	0.105234033035042
1921	1921	hsa:8564	2	11	-0.572077553547355	0.014	3.19135778905982	0.177	0.0173467520625309
1922	1922	hsa:8566	9	2570	0.00251432509006145	0.566	384.558002824751	0.238	0.40474982724672
1923	1923	hsa:8569	3	1083	0.0352183064235044	0.922	162.760201549796	0.007	0.0390018781662642
1924	1924	hsa:8573	7	2168	-0.0274722435796167	0.069	365.611978470817	0.114	0.0459783872887139
1925	1925	hsa:8600	5	2303	-0.0147802213566214	0.225	507.72584647097	0.247	0.216187962598254
1926	1926	hsa:8605	2	552	-0.0618016386961775	0.051	90.7875329236172	0.973	0.198655797734866
1927	1927	hsa:8607	2	75	0.0507346289431841	0.694	15.2946520593961	0.105	0.263722231880747
1928	1928	hsa:8611	4	1537	-0.0252684190228597	0.134	246.989120891705	0.567	0.271796969673712
1929	1929	hsa:8612	4	1537	-0.024475434329004	0.142	234.519601481086	0.211	0.135063463642667
1930	1930	hsa:8613	4	1537	-0.0246054736196363	0.141	220.738328816277	0.201	0.129332616270756
1931	1931	hsa:8625	2	13	-0.130744090092123	0.389	2.21116921784937	0.378	0.428926957307544
1932	1932	hsa:8626	6	2343	-0.00726125544699791	0.341	400.981982669771	0.206	0.256801948802708
1933	1933	hsa:8630	4	1367	0.00628078808222479	0.64	245.310264534107	0.306	0.515148753648257
1934	1934	hsa:8631	3	612	-0.0594253592077305	0.06	78.051074550521	0.057	0.0228391523694441
1935	1935	hsa:8639	5	1801	-0.00327320629524423	0.456	334.6843149979	0.212	0.322539503433055
1936	1936	hsa:8643	1	3	NA	1	0.572699164026415	0.162	0.45686574888746
1937	1937	hsa:8644	1	9	NA	1	1.28640684047792	0.236	0.57676593985374
1938	1938	hsa:8646	2	13	-0.301940542438559	0.11	3.58594495552926	0.149	0.0837706648952507
1939	1939	hsa:8648	16	2694	-0.0135957777386083	0.256	366.528113906172	0.482	0.381576063418174
1940	1940	hsa:8649	15	2694	-0.0135343476792812	0.26	365.767988700996	0.486	0.387750861493177
1941	1941	hsa:8650	2	18	-0.228664780190012	0.181	3.3323663014849	0.009	0.0120868361985111
1942	1942	hsa:8651	2	229	-0.0802029651358957	0.113	40.1659732030385	0.186	0.102197420145493
1943	1943	hsa:8654	3	533	-0.056169548095812	0.067	58.709470550063	0.216	0.0757687280910277
1944	1944	hsa:8659	2	45	-0.04077177531501	0.367	9.45665534221476	0.442	0.457255121617941
1945	1945	hsa:8661	17	2694	-0.0044065477707569	0.43	456.427300835974	0.466	0.522498808121961
1946	1946	hsa:8662	2	19	0.0173174777822044	0.566	3.41436042294919	0.35	0.518820596737499
1947	1947	hsa:8664	2	19	0.0173174777822044	0.569	3.44253158758636	0.000999000999000999	0.00481611014600731
1948	1948	hsa:8665	17	2694	-0.0044205955972975	0.433	363.870786731305	0.513	0.556321410734643
1949	1949	hsa:8666	2	19	0.0173174777822044	0.558	2.90720311486048	0.034	0.0941920161983822
1950	1950	hsa:8667	8	2555	-0.00237103967322232	0.452	318.187616902699	0.434	0.515683269115998
1951	1951	hsa:8668	6	2254	-0.00462232518075903	0.39	313.807802420124	0.556	0.548300653552096
1952	1952	hsa:8672	3	23	-0.11767361672119	0.254	4.31744092835057	0.165	0.174858193542363
1953	1953	hsa:8674	2	13	0.0349428278907306	0.579	2.00454250486697	0.058	0.14755141857553
1954	1954	hsa:8675	13	2648	-0.0103255131251053	0.303	329.519448791846	0.369	0.356774024788486
1955	1955	hsa:8677	4	22	0.148542262952285	0.822	7.22250639386189	0.014	0.0628879152855339
1956	1956	hsa:8678	4	200	-0.00529899529368452	0.467	32.2534641371149	0.002	0.00744961586783291
1957	1957	hsa:8683	2	12	-0.220192753025272	0.216	2.69771347864259	0.172	0.159483790044633
1958	1958	hsa:8692	4	20	-0.361295379357442	0.022	2.43837080581746	0.99	0.105126901656976
1959	1959	hsa:8697	4	1514	-0.0641815336100766	0.003	260.20700843608	0.199	0.00502888528640929
1960	1960	hsa:8698	3	540	-0.0422390032335547	0.114	117.10253082414	0.437	0.199241058761275
1961	1961	hsa:8702	2	18	-0.267181829864345	0.099	2.61308546780166	0.523	0.205078820214408
1962	1962	hsa:8703	2	23	-0.190429130267819	0.137	4.79039584685269	0.292	0.168767908298034
1963	1963	hsa:8704	2	41	-0.107652502735231	0.197	10.3379776310265	0.098	0.0955133335018286
1964	1964	hsa:8706	13	2671	-0.00221853006387799	0.466	369.919838149406	0.512	0.58049440729108
1965	1965	hsa:8707	2	18	-0.0381107966983353	0.421	2.34301637592091	0.027	0.0622575234360411
1966	1966	hsa:8717	4	1676	-0.0264769988142804	0.137	382.212657937932	0.043	0.0361373351813633
1967	1967	hsa:8733	19	228	-0.0577721186825052	0.144	33.0164522655266	0.013	0.0136295600705348
1968	1968	hsa:8735	5	2193	-0.0223590398977082	0.122	391.009390388212	0.173	0.102537125272784
1969	1969	hsa:8737	2	122	-0.123663842378859	0.063	16.9570179791579	0.000999000999000999	0.000671750895015053
1970	1970	hsa:8743	3	692	-0.0555788804140309	0.043	87.6152994617704	0.006	0.00238973815104501
1971	1971	hsa:8760	5	2249	-0.0265842658707042	0.061	283.430392793068	0.777	0.191919759089235
1972	1972	hsa:8761	8	2303	-0.0271859885925172	0.051	302.573844333321	0.499	0.118874285131651
1973	1973	hsa:8764	3	465	-0.0675336495214554	0.037	84.8934229110203	0.000999000999000999	0.000414192716672494
1974	1974	hsa:8766	1	3	NA	1	0.599343436271329	0.094	0.316259286690941
1975	1975	hsa:8767	4	2013	-0.020699421191256	0.158	294.5877772264	0.321	0.201932418710862
1976	1976	hsa:8772	6	2431	-0.044391558608705	0.021	276.288697179066	0.491	0.0574791231061141
1977	1977	hsa:8773	3	146	0.0159636171866683	0.587	24.5860594724587	0.033	0.0957698012602687
1978	1978	hsa:8777	6	2383	-0.0364032055376167	0.028	403.317364583731	0.325	0.05186527587568
1979	1979	hsa:8787	3	789	-0.00329574509691359	0.466	86.27613848914	0.103	0.19374853171736
1980	1980	hsa:8789	14	2693	-0.0150317138448079	0.176	565.90128640684	0.498	0.301020612636292
1981	1981	hsa:8792	3	922	-0.0370005293164011	0.139	149.275451387563	0.028	0.0254880545902504
1982	1982	hsa:8793	4	766	-0.0419106569814489	0.092	85.0898957895942	0.062	0.0351742156468433
1983	1983	hsa:8794	8	2564	-0.0277007989578111	0.053	585.841699431233	0.355	0.0935688925856347
1984	1984	hsa:8795	3	596	-0.0139216615680777	0.305	106.273504599763	0.025	0.044806962543226
1985	1985	hsa:8802	5	431	-0.0261247337449388	0.254	63.2042982020842	0.000999000999000999	0.00235455609488993
1986	1986	hsa:8807	3	776	-0.0169964799214078	0.276	150.008016185059	0.001	0.00253785027506021
1987	1987	hsa:8809	3	776	-0.0142025380165189	0.313	105.284612741917	0.000999000999000999	0.00283616987972828
1988	1988	hsa:8813	5	25	0.0557856002479201	0.643	5.89746917585983	0.004	0.0179090198275446
1989	1989	hsa:8817	3	955	0.00915449628425858	0.619	162.121540634424	0.022	0.0721258690451051
1990	1990	hsa:8818	14	903	-0.0293096387572174	0.137	149.594915448334	0.02	0.0189054447625151
1991	1991	hsa:8821	4	1840	-0.0465378417711484	0.013	313.825094476467	0.03	0.00345125188934783
1992	1992	hsa:8824	2	80	-0.0994877008444843	0.137	13.0194678780013	0.412	0.218692632625608
1993	1993	hsa:8826	2	379	-0.0196229273972035	0.327	62.8355155170439	0.007	0.0162052965048088
1994	1994	hsa:8829	19	2694	-0.0225433190681445	0.142	418.113295415506	0.481	0.251612016159031
1995	1995	hsa:8835	2	229	-0.0835447553498913	0.103	41.9779364049319	0.551	0.219580010803295
1996	1996	hsa:8836	2	8	0.357142857142857	0.876	1.40932167805474	0.039	0.149521575493167
1997	1997	hsa:8837	2	125	-0.159840889532583	0.012	19.9682024659312	0.041	0.00423957966600421
1998	1998	hsa:8841	11	2651	-0.0121439818074576	0.275	360.749818681528	0.37	0.334272809261597
1999	1999	hsa:8844	5	2218	-0.0342208511861218	0.028	374.131083711875	0.674	0.0937952730807383
[truncated: 710 more rows]
