# Supplementary material for: GeneSurrounder: network-based identification of disease genes in expression data
Source: BMC Bioinformatics. 2019 May 6;20:229. doi: 10.1186/s12859-019-2829-y (PMC6503437; doi:10.1186/s12859-019-2829-y)
Supplement: Supplementary file 3 — Table of the full results of GeneSurrounder applied to GSE9891. (CSV 262 kb) [file 12859_2019_2829_MOESM3_ESM.csv]

	X1	gene.id	radius	size	observed.tau_b	p.Decay	observed.cor	p.Sphere	p.Fisher
1	1	hsa:2	5	1685	0.0208818468378242	0.817	293.884693692878	0.000999000999000999	0.00661996161551281
2	2	hsa:9	4	923	0.00285610347531507	0.55	127.042027446611	0.276	0.437972056648328
3	3	hsa:10	1	2	NA	1	0.444983768437245	0.006	0.0366959748585245
4	4	hsa:15	2	37	-0.0980286162791744	0.257	4.61761449755678	0.161	0.173163990782216
5	5	hsa:18	2	94	-0.0994313340380213	0.116	8.45742183965252	0.857	0.328902857146436
6	6	hsa:25	3	1173	-0.0010758237938773	0.497	149.165672224233	0.003	0.0111948875906105
7	7	hsa:27	4	1643	0.00931716144090052	0.624	199.78082795109	0.031	0.095663295023962
8	8	hsa:28	2	13	-0.496138938356834	0.043	1.37951528707809	0.596	0.119530780198963
9	9	hsa:30	2	98	-0.000734486451891607	0.498	12.1854074291919	0.542	0.623409999328715
10	10	hsa:31	2	66	0.0797900018333701	0.784	5.37145464776943	0.191	0.434082116439036
11	11	hsa:32	4	1454	-0.00294994252283386	0.441	225.714152706769	0.733	0.68830907169884
12	12	hsa:33	5	2141	0.000612371148155862	0.505	228.256764093747	0.165	0.290388179510238
13	13	hsa:34	1	17	NA	1	1.91217565152475	0.032	0.142144620037837
14	14	hsa:36	2	45	0.00738918497535788	0.531	5.95310025676409	0.046	0.115097929007337
15	15	hsa:37	2	36	-0.01187827741833	0.473	4.21378509297801	0.177	0.29137130264258
16	16	hsa:38	3	208	-0.0185758539561968	0.359	21.6033489616324	0.000999000999000999	0.00320381056289856
17	17	hsa:43	6	634	-0.0493159614671133	0.068	67.3055499785087	0.08	0.0338040306265417
18	18	hsa:48	6	1982	-0.0321649541614024	0.064	228.03641073206	0.649	0.173670105464156
19	19	hsa:51	4	1362	0.0409129949903715	0.951	134.269320932495	0.227	0.54682647451771
20	20	hsa:52	3	658	-0.0216383435654779	0.263	83.2810011537417	0.083	0.105314357973802
21	21	hsa:53	5	1617	-0.0259189899307104	0.125	231.45047393901	0.576	0.261438419517558
22	22	hsa:54	5	1617	-0.0286406421090268	0.104	249.464284199394	0.179	0.0927771894071156
23	23	hsa:55	2	30	-0.0768851744438489	0.33	3.48927203986065	0.023	0.0446362107886912
24	24	hsa:59	4	830	-0.0163903565826943	0.301	160.173162355217	0.000999000999000999	0.00273919014771038
25	25	hsa:70	3	389	-0.102108883611133	0.007	35.7480452843634	0.401	0.0192999186213579
26	26	hsa:72	4	830	-0.0153687221298323	0.313	133.605023725228	0.000999000999000999	0.00283616987972828
27	27	hsa:81	3	797	-0.0431357464226312	0.108	76.2679176375441	0.002	0.00203909014446051
28	28	hsa:87	3	797	-0.0459816486371309	0.091	126.329873286354	0.000999000999000999	0.000936877322889138
29	29	hsa:88	3	797	-0.0441927958165883	0.102	77.9140688625464	0.696	0.258779192483862
30	30	hsa:89	3	797	-0.0418855822355474	0.118	98.1015158413266	0.388	0.186973642069988
31	31	hsa:90	4	1438	0.0123246949927819	0.699	207.800092327617	0.014	0.0550638891291234
32	32	hsa:91	2	50	0.0879224935566662	0.791	7.22340879784635	0.03	0.112504290898523
33	33	hsa:92	3	37	-0.20960572406201	0.048	5.02902522961723	0.023	0.00862093212556446
34	34	hsa:93	3	31	-0.184064612081641	0.105	5.80339590308569	0.007	0.00603849544318231
35	35	hsa:98	3	162	-0.0405488284605481	0.263	14.2489805786807	0.068	0.0898465123077965
36	36	hsa:100	5	1579	-0.037503158659605	0.054	205.851874971722	0.484	0.121387125780005
37	37	hsa:102	3	296	-0.0121346558772721	0.402	31.2370006108044	0.989	0.764289689147453
38	38	hsa:107	2	448	-0.0061003809669142	0.418	68.6702610340693	0.000999000999000999	0.00366680316241054
39	39	hsa:108	3	1370	-0.0323240376628677	0.095	127.65214262284	0.486	0.188162374210528
40	40	hsa:109	3	1393	-0.0315843617327485	0.091	139.862124326984	0.199	0.0907504688197256
41	41	hsa:112	3	1368	-0.0358143814673128	0.079	136.333506300335	0.058	0.0292589094422647
42	42	hsa:113	3	1370	-0.0321651589118262	0.094	245.275518052665	0.029	0.0188228117719995
43	43	hsa:114	3	1370	-0.0345047264026525	0.078	175.645377115193	0.022	0.0126430749209045
44	44	hsa:115	3	1370	-0.0328370101958419	0.09	189.429943415754	0.24	0.104437338428708
45	45	hsa:116	3	166	0.0390432096675635	0.721	14.1554659928966	0.001	0.00593734229430979
46	46	hsa:117	21	2708	0.0528344794025655	0.996	290.078468577504	0.479	0.830156074583148
47	47	hsa:124	2	135	-0.192887657783103	0.005	15.7073101416161	0.841	0.0272125775442681
48	48	hsa:125	2	135	-0.190882588575379	0.007	19.0155422868971	0.54	0.0248649581981454
49	49	hsa:128	2	135	-0.192486643941558	0.006	11.5392470138449	0.542	0.0218810335038885
50	50	hsa:130	2	135	-0.196496782357007	0.006	13.311541376346	0.593	0.0236199847020895
51	51	hsa:132	4	1148	-0.0594697943100879	0.008	100.076653837888	0.743	0.0364092169429923
52	52	hsa:136	1	2	NA	1	0.407322442539137	0.077	0.274424138998891
53	53	hsa:146	3	480	0.0120655769693645	0.655	63.9890288491992	0.000999000999000999	0.00545192608276092
54	54	hsa:148	3	480	0.00585852636889361	0.573	40.0305875882273	0.001	0.00485023003403598
55	55	hsa:154	3	788	0.0256083968147362	0.797	134.266823986517	0.002	0.0118617648655909
56	56	hsa:155	2	79	-0.175609199422533	0.024	11.1075977287123	0.000999000999000999	0.000279043905565221
57	57	hsa:156	3	452	0.0402576464827582	0.785	66.9290314507737	0.001	0.00639761406954277
58	58	hsa:158	3	394	-0.111927143873217	0.005	30.4029944971043	0.078	0.00345125188934783
59	59	hsa:163	3	53	-0.16182940391089	0.08	4.9977837130124	0.618	0.198105855830769
60	60	hsa:174	4	1256	-0.036793920631458	0.071	88.8451285517148	0.417	0.133816074201289
61	61	hsa:178	2	30	-0.0650536311179483	0.391	1.98611268211022	0.982	0.75149491477158
62	62	hsa:182	1	2	NA	1	0.51733793887431	0.002	0.0144292161968444
63	63	hsa:185	3	480	0.00346864592379253	0.552	87.1308196090851	0.000999000999000999	0.00468894608455063
64	64	hsa:186	3	319	-0.0179003828391856	0.351	26.8052834585105	0.000999000999000999	0.00314031874727858
65	65	hsa:189	6	2143	-0.031476538921354	0.054	223.383472083974	0.226	0.0659747204140066
66	66	hsa:191	3	116	-0.145024928888071	0.024	13.250686448059	0.227	0.0338457365568151
67	67	hsa:207	2	604	-0.0183923554136037	0.299	70.7471410958284	0.15	0.184083761317908
68	68	hsa:208	2	604	-0.0182908103181525	0.298	48.783407610171	0.523	0.445560964754776
69	69	hsa:210	6	719	-0.0587889768458102	0.04	96.6535650054294	0.586	0.111417617206567
70	70	hsa:211	5	717	-0.0560289315104104	0.044	79.8167523018279	0.407	0.0899430685829101
71	71	hsa:212	5	717	-0.0593381040206138	0.037	67.6721789883268	0.985	0.157149054346172
72	72	hsa:216	3	249	-0.081590112942998	0.066	28.8560424395982	0.376	0.11654255374595
73	73	hsa:217	5	2097	0.0168531491214268	0.814	270.12471934101	0.036	0.132748035852729
74	74	hsa:218	5	2033	0.0309673939365563	0.95	290.649424401638	0.086	0.286334094340392
75	75	hsa:219	5	2097	0.016869983191935	0.815	220.781315039363	0.283	0.568972510556307
76	76	hsa:221	1	24	NA	1	3.92001360171025	0.099	0.327950907455907
77	77	hsa:223	2	134	0.106705408009257	0.94	12.5378401841462	0.402	0.745624727131405
78	78	hsa:224	5	2097	0.0164951445552861	0.805	191.600924124514	0.184	0.430989581297388
79	79	hsa:226	2	121	0.0988538033055849	0.914	16.7840629524477	0.003	0.0189172436274828
80	80	hsa:229	4	1134	-0.0170655514948758	0.235	97.1269533017374	0.444	0.340158884228013
81	81	hsa:230	3	204	0.0428748025351923	0.76	17.0415912587096	0.000999000999000999	0.00621301262239051
82	82	hsa:238	1	7	NA	1	0.961096563659397	0.105	0.341648467526584
83	83	hsa:239	3	726	-0.0616388846202768	0.024	55.2890250316713	0.408	0.0550916481050535
84	84	hsa:240	3	731	-0.0685014445396022	0.012	142.647912236449	0.017	0.0019374676750805
85	85	hsa:242	3	726	-0.0655150042935788	0.019	64.0910310718487	0.168	0.0215367674572675
86	86	hsa:247	3	731	-0.0623738218499829	0.02	74.4737636865442	0.225	0.0288165504699264
87	87	hsa:248	11	2454	0.00439555372086645	0.595	323.03837746584	0.176	0.341017031280885
88	88	hsa:249	5	9	-0.457604315322429	0.075	0.711745543389738	0.892	0.247834817262628
89	89	hsa:250	5	9	-0.326860225230307	0.169	1.5553216337888	0.02	0.0226117929448668
90	90	hsa:262	2	17	-0.404226041727222	0.037	1.82603242919193	0.322	0.064693509662727
91	91	hsa:267	2	4	-0.235702260395516	0.495	0.760262787304316	0.015	0.0438290517626283
92	92	hsa:269	5	1551	-0.00588646896722936	0.381	238.18031880599	0.001	0.00338050296066111
93	93	hsa:270	4	1200	-0.0612336198161412	0.009	114.24924568478	0.087	0.00638331186592523
94	94	hsa:273	3	868	0.00365357741989493	0.579	98.9824810820288	0.011	0.0385726562715592
95	95	hsa:275	4	430	-0.114594444646946	0.004	48.8305272147317	0.364	0.0109666827513263
96	96	hsa:285	1	21	NA	1	2.72802942041444	0.057	0.220288128635412
97	97	hsa:286	2	106	0.0544859560874904	0.753	16.8097174463849	0.012	0.051564283515881
98	98	hsa:287	1	7	NA	1	1.08250031105782	0.047	0.190707560831788
99	99	hsa:288	2	106	0.0483753815730055	0.736	14.5862139172926	0.074	0.212965968606245
100	100	hsa:290	7	2117	0.0228143631847494	0.894	312.482407559271	0.015	0.0712306289404434
101	101	hsa:291	3	116	-0.0356520435570098	0.326	11.4128606856846	0.001	0.00294332789557081
102	102	hsa:292	3	116	-0.0396450724353949	0.307	15.2313485487739	0.301	0.312479126083865
103	103	hsa:293	3	116	-0.0390746397384828	0.308	14.0771246663198	0.009	0.0190940521398982
104	104	hsa:314	2	57	-0.0891196357566457	0.179	4.23777754841191	0.297	0.209164114501975
105	105	hsa:316	2	148	-0.0236521169738507	0.364	19.1743648764818	0.045	0.0837295510051272
106	106	hsa:317	2	58	-0.0602475233128778	0.305	6.92057067799294	0.726	0.555268666373195
107	107	hsa:318	3	567	-0.0510646760691328	0.056	52.5930967785721	0.728	0.171219803566315
108	108	hsa:322	4	115	0.00760576827032071	0.547	12.3341948692426	0.264	0.423853747907198
109	109	hsa:324	3	845	-0.0286835736062535	0.181	100.209625401547	0.006	0.00849822590641284
110	110	hsa:329	2	207	-0.0582108850042832	0.164	14.1726618349018	0.973	0.452428116372127
111	111	hsa:330	3	898	0.00645364983844565	0.59	157.170832956294	0.000999000999000999	0.0049724961414831
112	112	hsa:331	3	848	0.0173981875125829	0.715	98.4326022531897	0.301	0.545810581678461
113	113	hsa:332	2	85	-0.155096990867279	0.038	11.555737320152	0.711	0.124586805683167
114	114	hsa:335	1	4	NA	1	0.536825711474075	0.411	0.776445608503706
115	115	hsa:336	5	2136	0.00247205024222724	0.545	196.162427325581	0.258	0.416453801731929
116	116	hsa:348	1	1	NA	1	0.354574812234187	0.091	0.309117515294341
117	117	hsa:351	5	1810	0.0150260559475644	0.787	212.915602943173	0.137	0.347964407891172
118	118	hsa:353	4	1223	-0.0617453317009135	0.011	131.415840478237	0.34	0.0246416245566583
119	119	hsa:354	3	253	0.031797618959209	0.725	33.745205467831	0.007	0.0318884009268255
120	120	hsa:355	3	707	0.0400648429502366	0.887	144.414250548593	0.000999000999000999	0.00711431161079037
121	121	hsa:356	4	1893	0.000139252838129336	0.505	265.701988931997	0.067	0.148409090497096
122	122	hsa:359	2	159	0.0954138811055521	0.952	24.6252269308207	0.000999000999000999	0.0075683952671106
123	123	hsa:367	5	2394	-0.0053707489924549	0.388	255.515881622704	0.645	0.596933891660709
124	124	hsa:369	2	360	-0.0211348317792855	0.315	35.0128127545019	0.199	0.236299450523351
125	125	hsa:383	4	1736	0.0199948814863103	0.823	146.305514631029	0.038	0.139637415410517
126	126	hsa:387	2	554	0.0451369342046838	0.911	69.8217285200434	0.000999000999000999	0.00728250957413095
127	127	hsa:391	2	261	-0.0472678160443683	0.196	54.8145777248665	0.000999000999000999	0.00186765784037673
128	128	hsa:396	3	1063	0.0484436916860721	0.963	138.975498540856	0.114	0.352318838358768
129	129	hsa:397	4	1943	0.0398846008319316	0.983	398.993911043118	0.007	0.0411414390579699
130	130	hsa:405	3	1216	-0.00249875394678296	0.465	105.84756045833	0.426	0.518804406651844
131	131	hsa:406	4	1636	-0.00796309504529034	0.365	266.544366035879	0.083	0.136229725813548
132	132	hsa:409	3	677	0.00656029426418455	0.572	105.285614706814	0.000999000999000999	0.00483849775252432
133	133	hsa:410	4	245	-0.0891365653702341	0.034	34.2736637238711	0.857	0.132161579599595
134	134	hsa:411	5	220	-0.0715021921058205	0.117	37.2148638980635	0.007	0.00663998228229709
135	135	hsa:412	3	371	0.0170463598668319	0.658	50.3085255293638	0.435	0.644292165034355
136	136	hsa:427	1	14	NA	1	2.82985631956384	0.01	0.0560517018598809
137	137	hsa:432	6	2285	0.00414758711956502	0.592	183.738597609945	0.185	0.351739699693173
138	138	hsa:433	1	1	NA	1	0.444584341914759	0.012	0.0650741835503296
139	139	hsa:434	3	57	-0.00781846729437302	0.456	7.42047099809972	0.000999000999000999	0.00396051135409095
140	140	hsa:435	3	779	-0.0481838581235609	0.05	96.612582430323	0.137	0.0409870203929498
141	141	hsa:438	2	90	-0.156259430442437	0.035	7.02765233349923	0.864	0.136037353364765
142	142	hsa:440	4	1076	-0.0670263917260009	0.008	81.2482545414442	0.701	0.0346774108128331
143	143	hsa:443	4	1076	-0.0643842887997082	0.012	115.367261729708	0.782	0.053195542189049
144	144	hsa:445	2	116	-0.0682605907687919	0.185	13.20175563863	0.525	0.323596847177336
145	145	hsa:462	2	19	-0.118469775551818	0.293	3.38463006741471	0.000999000999000999	0.00267427260003909
146	146	hsa:466	5	2303	-0.013259313277923	0.225	187.427353859379	0.568	0.390721500593546
147	147	hsa:467	3	855	0.026393331079355	0.822	77.379227558592	0.000999000999000999	0.00665546519798627
148	148	hsa:471	3	291	-0.125236076260528	0.005	23.7811418367116	0.626	0.0211798407189662
149	149	hsa:472	3	933	-0.0283465333918891	0.142	89.5854398074835	0.491	0.25540837553422
150	150	hsa:477	3	1392	0.0202405725768525	0.834	151.450033509411	0.142	0.371088228206449
151	151	hsa:478	3	1392	0.020969516851192	0.839	150.712402299566	0.018	0.0784236000695608
152	152	hsa:479	5	911	0.0098702299907891	0.631	116.502988982897	0.014	0.0506112878295461
153	153	hsa:481	2	365	0.0459386670997129	0.853	35.0708052438693	0.233	0.519870254972688
154	154	hsa:482	3	1392	0.0207518230860046	0.843	196.728708092028	0.000999000999000999	0.00680425058296615
155	155	hsa:483	1	14	NA	1	1.97218506809338	0.046	0.18763923859468
156	156	hsa:486	4	2104	0.0226889232894715	0.848	270.380381300335	0.02	0.0861041841205677
157	157	hsa:487	4	1062	0.0319133995887322	0.908	158.051600251108	0.01	0.0517712642642299
158	158	hsa:488	2	45	-0.124580424573642	0.163	3.73688891276807	0.402	0.244104549604253
159	159	hsa:489	5	1940	-0.0112622298788009	0.265	284.30273914691	0.033	0.0501899438761237
160	160	hsa:490	2	149	0.0731125578629157	0.87	11.8511496414352	0.163	0.418802813904615
161	161	hsa:491	5	2302	-0.0114705268084025	0.253	163.499828211248	0.703	0.484979549832827
162	162	hsa:492	2	133	0.12755042534603	0.969	16.6495226676319	0.000999000999000999	0.00768641142614185
163	163	hsa:493	5	2302	-0.0116833601926189	0.244	212.29341660257	0.634	0.443404120439263
164	164	hsa:495	3	32	-0.272531339543351	0.028	3.64581825174192	0.771	0.104391314351185
165	165	hsa:513	4	141	0.0616008438649726	0.815	20.3378851461406	0.01	0.0473493594165943
166	166	hsa:516	3	32	-0.272531339543351	0.029	3.89295157112478	0.009	0.00241450842931745
167	167	hsa:518	3	32	-0.272531339543351	0.026	4.39741737173106	0.18	0.0297856595511661
168	168	hsa:521	3	32	-0.279098359773311	0.025	3.47797074359786	0.009	0.00211486728504597
169	169	hsa:522	3	32	-0.272531339543351	0.029	4.56515954438512	0.003	0.000900415412219942
170	170	hsa:523	3	32	-0.279098359773311	0.025	4.1175303705547	0.011	0.00252965335158187
171	171	hsa:525	3	32	-0.279098359773311	0.025	1.9724459324948	1	0.117221986352848
172	172	hsa:526	3	32	-0.279098359773311	0.024	4.97585696430187	0.511	0.0662389326532284
173	173	hsa:528	3	32	-0.279098359773311	0.024	5.84693692878472	0.003	0.000758796799604271
174	174	hsa:529	3	32	-0.25939729908343	0.035	4.74920114695503	0.059	0.0148321207335553
175	175	hsa:533	3	45	-0.0412138061574129	0.38	7.41697513234096	0.093	0.153472424959281
176	176	hsa:534	3	32	-0.272531339543351	0.029	2.6969490883178	0.682	0.0973707543171169
177	177	hsa:535	2	38	0.0323409582177974	0.598	4.46289787123337	0.019	0.0622351371319139
178	178	hsa:537	2	141	0.088079491459406	0.893	21.7816791184056	0.001	0.00716268511153939
179	179	hsa:539	3	32	-0.272531339543351	0.028	4.64558990702199	0.001	0.000321532569338094
180	180	hsa:545	3	495	-0.0841501756007725	0.028	44.8417769036739	0.831	0.11077141505326
181	181	hsa:549	2	19	-0.0987248129598487	0.336	2.37528277983893	0.042	0.0742394186513762
182	182	hsa:554	2	54	-0.127089681897087	0.16	8.33165974798661	0.000999000999000999	0.00155705674214802
183	183	hsa:575	5	2183	0.0100500441291484	0.683	262.559034533074	0.192	0.397541449518293
184	184	hsa:581	2	141	-0.0185149208610252	0.402	14.9780895111302	0.395	0.450991023738684
185	185	hsa:586	6	1728	-0.0242732304920852	0.122	137.174067957651	0.148	0.0905377898358143
186	186	hsa:587	1	1	NA	1	0.425512255678219	0.000999000999000999	0.00790085392538984
187	187	hsa:593	5	1728	-0.0248797452128284	0.116	157.614655206542	0.181	0.102112436354091
188	188	hsa:595	2	514	-0.0787604870132596	0.006	67.2313563252194	0.034	0.00193746767508049
189	189	hsa:596	2	407	0.0531240094538896	0.883	45.911683614605	0.084	0.267120708722323
190	190	hsa:597	3	678	-0.0072764108646701	0.416	148.531196271831	0.000999000999000999	0.0036512518641189
191	191	hsa:598	2	231	-0.0315837955002419	0.272	19.1509224278346	0.983	0.620071513559828
192	192	hsa:599	4	62	0.106864240987187	0.853	7.61541305651072	0.042	0.155093669956571
193	193	hsa:604	3	540	-0.0293289398547746	0.187	53.5629680006334	0.047	0.0503983613889834
194	194	hsa:608	4	277	0.0179497346303916	0.636	51.8926171839652	0.000999000999000999	0.00531248162916364
195	195	hsa:613	2	197	-0.0689022472900206	0.12	20.1023521627002	0.019	0.016150562026116
196	196	hsa:622	6	1463	0.0515997709253002	0.985	164.990314790517	0.088	0.298658722628576
197	197	hsa:623	3	743	0.00941001320522039	0.615	79.7111107026513	0.000999000999000999	0.00515769829285901
198	198	hsa:624	4	1776	0.016120590056171	0.782	217.942103655778	0.005	0.0255878920084908
199	199	hsa:627	4	1821	0.0459778336774193	0.995	189.256662999955	0.199	0.518666770539056
200	200	hsa:629	5	480	-0.0359036263617569	0.202	79.1064319688263	0.000999000999000999	0.00191874621069033
201	201	hsa:635	5	1867	-0.00831121691897264	0.349	200.402494683739	0.069	0.113814804050574
202	202	hsa:637	3	302	-0.0320689409091003	0.286	44.6302632397521	0.000999000999000999	0.00261729092785072
203	203	hsa:641	4	75	-0.146380565535852	0.058	15.0524061736494	0.000999000999000999	0.000623228660109445
204	204	hsa:644	4	1066	0.0196838893225499	0.788	119.640613688806	0.106	0.290892388782998
205	205	hsa:645	6	2461	0.0169984488158476	0.856	295.450893160121	0.187	0.453344963867549
206	206	hsa:648	6	1398	-0.069319867727603	0.002	134.745619033345	0.865	0.0127321665959173
207	207	hsa:650	4	1130	0.00788778508471617	0.637	134.883173751244	0.000999000999000999	0.00531983480173422
208	208	hsa:652	2	73	-0.177929919677919	0.037	7.59144039566555	0.382	0.0743331375669082
209	209	hsa:653	2	13	-0.603881084877118	0.006	1.15996148538594	0.288	0.0127194461716613
210	210	hsa:655	2	17	-0.55350930346256	0.003	2.29141805605828	0.418	0.00963249671331134
211	211	hsa:658	2	61	0.236006635736924	0.986	9.77586021627002	0.041	0.170124013656509
212	212	hsa:659	2	57	0.184641202854677	0.956	10.1494441962266	0.000999000999000999	0.00759619085999514
213	213	hsa:661	3	567	-0.0518430367985966	0.052	55.1898053626369	0.949	0.197829126596062
214	214	hsa:669	4	1079	-0.0125300534609524	0.305	115.237525167406	0.209	0.239226349426096
215	215	hsa:672	4	605	-0.0690399222716939	0.033	63.1375144217718	0.097	0.0215884787496001
216	216	hsa:675	4	44	-0.340274103978735	0.003	7.25318127318795	0.000999000999000999	4.11125807281596e-05
217	217	hsa:683	2	68	-0.055466468421113	0.267	11.2683714991856	0.039	0.0579452237390122
218	218	hsa:685	3	701	-0.0223261151222114	0.243	75.4878312765813	0.06	0.0762257643740157
219	219	hsa:701	4	453	-0.151557899491666	0.002	71.6287546093114	0.012	0.000279298961462792
220	220	hsa:708	4	927	-0.0785534756385178	0.005	88.3041078013302	0.484	0.0169980503279288
221	221	hsa:710	3	23	-0.08434823356733	0.377	4.5666179814044	0.001	0.00334899104468463
222	222	hsa:712	5	1256	-0.03473224278587	0.069	242.55244010723	0.007	0.00417094355578256
223	223	hsa:713	5	1256	-0.034610168240316	0.07	249.836258455117	0.005	0.00313515209121829
224	224	hsa:718	3	480	-0.0323753182612893	0.225	82.9322862467197	0.000999000999000999	0.00211297919342748
225	225	hsa:719	4	480	-0.0384774967363107	0.17	115.26708273007	0.000999000999000999	0.00164407689871329
226	226	hsa:722	3	22	0.0671519136687817	0.661	2.22662966021175	0.053	0.152444866498167
227	227	hsa:725	6	1561	0.037354759699181	0.918	180.300913803049	0.001	0.0073378614876216
228	228	hsa:727	1	3	NA	1	0.477322470817121	0.078	0.276981623278819
229	229	hsa:728	5	488	-0.0176895546564536	0.355	106.333818065107	0.000999000999000999	0.00317208716826353
230	230	hsa:729	1	2	NA	1	0.763161280653334	0.000999000999000999	0.00790085392538984
231	231	hsa:730	1	4	NA	1	0.628895999230839	0.152	0.438348963236651
232	232	hsa:731	3	6	-0.544949260913066	0.124	0.932079110487739	0.201	0.116941515877097
233	233	hsa:732	8	1536	0.0306767380058524	0.865	208.992318285675	0.001	0.00696565560914302
234	234	hsa:733	7	488	-0.0249352785195972	0.277	36.2516839539408	0.074	0.100182498294825
235	235	hsa:735	3	5	0.836660026534076	1	0.341032485747896	0.114	0.361557478686991
236	236	hsa:773	3	1166	-0.020542773408206	0.214	104.592830258574	0.987	0.539633370702151
237	237	hsa:775	2	373	0.0324438715954676	0.762	46.4056568692878	0.000999000999000999	0.0062273620269624
238	238	hsa:776	2	373	0.0324438715954676	0.761	38.1053220579586	0.000999000999000999	0.0062201879810505
239	239	hsa:777	3	761	0.00622819617063662	0.57	82.2070026185413	0.126	0.260964598281029
240	240	hsa:778	2	302	-0.00149859574490449	0.498	47.1511147181251	0.002	0.00788011624717817
241	241	hsa:781	3	1146	0.0280306121191409	0.865	157.75117565718	0.002	0.0127321665959173
242	242	hsa:782	2	224	-0.030245444495318	0.292	28.1832717344584	0.003	0.00704316655311643
243	243	hsa:783	2	224	-0.0287564379970869	0.306	25.0188600013573	0.599	0.494282305169271
244	244	hsa:784	3	1146	0.0246023497723544	0.84	108.948482461994	0.031	0.121037082861152
245	245	hsa:786	2	224	-0.0296870670584813	0.301	26.9195625678672	0.001	0.00274162848825784
246	246	hsa:790	4	1154	-0.0529484031998067	0.024	152.555786806624	0.712	0.0866255452113
247	247	hsa:793	3	346	-0.0658782630363261	0.058	23.8634618756221	0.044	0.017789680435251
248	248	hsa:795	5	1493	0.0242424625648332	0.846	141.119425702425	0.03	0.118620887067742
249	249	hsa:800	3	999	0.0214965764956472	0.795	191.651416585603	0.002	0.0118359938077725
250	250	hsa:801	2	418	-0.0441558757456285	0.145	28.5317752635508	0.629	0.309608648194299
251	251	hsa:805	2	418	-0.0438703851696869	0.148	28.4291968769795	0.96	0.419329939162814
252	252	hsa:808	2	418	-0.0435848945937453	0.147	33.780560017193	0.563	0.288984722668817
253	253	hsa:810	1	56	NA	1	7.76302413243145	0.001	0.00790775527898214
254	254	hsa:811	4	1158	-0.0302539078949103	0.109	115.593963498778	0.173	0.0937357159788927
255	255	hsa:814	5	2449	0.0168697087910628	0.809	199.748378257624	0.354	0.644487272227714
256	256	hsa:815	1	51	NA	1	8.53100044679214	0.009	0.0513947763148133
257	257	hsa:820	3	53	-0.141522160347046	0.103	6.54037177065424	0.625	0.240957551099887
258	258	hsa:823	2	6	-0.577350269189626	0.165	0.61492808908696	0.834	0.410536272719418
259	259	hsa:824	2	106	-0.103528979343837	0.115	13.6036564847073	0.927	0.345253603630469
260	260	hsa:836	3	1294	-0.0294559953957852	0.102	181.168343786761	0.05	0.0320204251701845
261	261	hsa:838	4	322	-0.0104091116359297	0.397	40.4101064100534	0.001	0.003506134988079
262	262	hsa:839	3	408	0.0230825362541067	0.71	35.8706904352547	0.284	0.52452035496716
263	263	hsa:840	3	453	-0.0473499090652232	0.139	60.2832322866709	0.006	0.00674645714777501
264	264	hsa:841	3	965	-0.00365487468763525	0.473	115.758388663922	0.000999000999000999	0.00409086627254542
265	265	hsa:842	3	1231	0.00584823454746957	0.622	123.132392571939	0.022	0.072409269314385
266	266	hsa:843	2	75	0.0324701625236378	0.662	11.8206518358067	0.000999000999000999	0.00550316069986269
267	267	hsa:847	3	575	-0.0169196797103214	0.293	52.8627358383857	0.008	0.0165390211786347
268	268	hsa:857	2	122	-0.0660633352802535	0.171	20.2501590636594	0.002	0.00307139933874837
269	269	hsa:858	2	122	-0.0689832617014802	0.158	19.3868689767894	0.111	0.0884508918057348
270	270	hsa:861	3	624	-0.0477644917836715	0.082	117.722956350104	0.056	0.0293127547348787
271	271	hsa:862	3	528	-0.00488370383921016	0.447	99.4805921127047	0.001	0.00389468952761777
272	272	hsa:867	2	482	-0.0145454054469591	0.361	48.4557767679395	0.981	0.721760656063124
273	273	hsa:868	1	64	NA	1	8.43228271197177	0.013	0.0694564769797678
274	274	hsa:873	3	224	-0.0868932476694017	0.065	27.3744005067415	0.755	0.197006951817572
275	275	hsa:874	3	224	-0.087122972051872	0.061	31.004971976518	0.477	0.132016586543858
276	276	hsa:875	2	41	0.0595022627818514	0.647	4.90067004682834	0.007	0.0289731638841541
277	277	hsa:883	3	72	-0.165029899926262	0.044	6.15854970704009	0.748	0.145270867441106
278	278	hsa:887	4	1213	0.0168373218242464	0.736	159.785181346711	0.001	0.00604571040327726
279	279	hsa:889	3	825	-0.050007302632106	0.05	88.6600795459687	0.102	0.0320204251701845
280	280	hsa:890	3	501	-0.0935529599265479	0.009	79.9565749140349	0.000999000999000999	0.000113460109219431
281	281	hsa:891	2	107	-0.0353964950238136	0.322	21.1494449031762	0.000999000999000999	0.00290860203906739
282	282	hsa:894	2	352	-0.0820769403097157	0.018	44.4330306646457	0.000999000999000999	0.000214456033373848
283	283	hsa:896	3	1214	-0.0536447541098917	0.012	126.275289707945	0.027	0.00292726452166371
284	284	hsa:898	2	73	-0.141617480519851	0.078	15.5727762193467	0.000999000999000999	0.000815049446618787
285	285	hsa:901	2	101	0.016000800060005	0.56	10.4377191543752	0.08	0.183928511852342
286	286	hsa:902	3	192	-0.170789110730567	0.003	28.8905486494435	0.002	7.81425065324172e-05
287	287	hsa:916	2	201	0.0245317695111859	0.651	42.7389277554067	0.000999000999000999	0.00542261565521858
288	288	hsa:917	2	182	0.0238935720234773	0.65	36.3458397430097	0.000999000999000999	0.00541528421779719
289	289	hsa:919	3	827	0.00843923174138454	0.556	178.658029392136	0.000999000999000999	0.00471891350730271
290	290	hsa:920	3	289	-0.0123091490979333	0.433	69.8871425662836	0.000999000999000999	0.00378313628273494
291	291	hsa:925	3	250	0.00470571064722355	0.527	61.5166027112931	0.000999000999000999	0.0045009851265149
292	292	hsa:926	3	250	0.0290042892619779	0.663	44.0993638867523	0.000999000999000999	0.00551047387628165
293	293	hsa:929	3	908	0.0242338836161126	0.791	205.481172518324	0.000999000999000999	0.00643484591769131
294	294	hsa:930	2	191	0.00154326261763876	0.491	21.757765134377	0.000999000999000999	0.00422822414772917
295	295	hsa:933	3	444	-0.0149867329571154	0.375	58.3324628427292	0.000999000999000999	0.00333026374837424
296	296	hsa:941	3	299	0.0131220135306629	0.613	53.5181261876753	0.000999000999000999	0.00514292003996741
297	297	hsa:942	3	299	0.0067321634635575	0.562	74.4571404737128	0.000999000999000999	0.00476381080232054
298	298	hsa:947	6	1286	-0.0423576308956293	0.063	164.645897430097	0.000999000999000999	0.000671750895015053
299	299	hsa:948	3	492	0.0225934135454461	0.693	87.095969114786	0.000999000999000999	0.00572917850245901
300	300	hsa:952	4	2036	0.0179693158921188	0.817	321.435589115238	0.135	0.353450991335219
301	301	hsa:953	4	1770	-0.0293940203314928	0.102	334.724049294181	0.06	0.0373087022766424
302	302	hsa:955	3	513	-0.0621966403851955	0.043	47.5931589901366	0.303	0.0695823860293635
303	303	hsa:958	3	664	0.0194351601598572	0.738	98.7454323986517	0.000999000999000999	0.0060548190614069
304	304	hsa:959	4	1037	0.0284175783073059	0.85	93.5616735759207	0.000999000999000999	0.00685372892356748
305	305	hsa:960	3	895	-0.0413118333824672	0.096	182.733604424939	0.000999000999000999	0.000983224314900734
306	306	hsa:961	3	254	-0.0232361311664888	0.308	33.8785524217265	0.118	0.156814407214682
307	307	hsa:962	4	419	0.0215649819810119	0.668	99.0834356053751	0.000999000999000999	0.00554701720181834
308	308	hsa:967	3	684	-0.029044211746442	0.184	83.9146464403674	0.074	0.0721172761725696
309	309	hsa:971	3	420	-0.0349125444803884	0.243	91.2879646072753	0.000999000999000999	0.00226333467875575
310	310	hsa:972	4	1639	0.0133281266351359	0.744	285.185451967016	0.004	0.0202879132821456
311	311	hsa:973	3	410	0.00043513275954924	0.506	61.4693629253009	0.000999000999000999	0.00434218435048852
312	312	hsa:974	3	410	-0.00449637184867548	0.478	57.6531931499412	0.000999000999000999	0.00412908878894628
313	313	hsa:978	5	1657	-0.0291003267414972	0.115	173.629604362727	0.264	0.136456946351165
314	314	hsa:983	3	754	-0.108340972869196	0.002	111.290301075694	0.015	0.000342429395289063
315	315	hsa:990	3	169	-0.240062568566906	0.001	36.2613366437426	0.000999000999000999	1.48017083499474e-05
316	316	hsa:993	3	449	-0.182133817223096	0.000999000999000999	77.7741600024884	0.000999000999000999	1.47879189328458e-05
317	317	hsa:994	2	148	-0.133124384181515	0.036	19.7723721269568	0.21	0.0444897237112577
318	318	hsa:995	1	16	NA	1	4.26817850194552	0.000999000999000999	0.00790085392538984
319	319	hsa:996	4	1514	-0.0548957406379626	0.014	223.04836666365	0.044	0.00516963437416935
320	320	hsa:998	2	588	-0.050165275602338	0.057	54.053103932902	0.089	0.0318778336751769
321	321	hsa:999	3	634	-0.0585020493882514	0.044	66.6185257555877	0.013	0.00484276453608632
322	322	hsa:1003	4	1661	0.0068407595725708	0.652	264.459338380011	0.002	0.0099655837353829
323	323	hsa:1017	2	156	-0.160729065906567	0.012	25.7476515134377	0.000999000999000999	0.00014783140949262
324	324	hsa:1020	2	115	0.0182961722301127	0.603	11.416383415528	0.295	0.485024443801151
325	325	hsa:1021	2	126	-0.165422439926542	0.007	18.9338655721202	0.000999000999000999	9.00041951695248e-05
326	326	hsa:1022	2	38	-0.284469731766755	0.007	5.54720938715953	0.000999000999000999	9.00041951695248e-05
327	327	hsa:1026	2	426	-0.0333104768076841	0.201	72.1872165132115	0.043	0.0497059408321912
328	328	hsa:1027	3	1191	-0.0539103223405811	0.021	113.774700111981	0.866	0.0910591790075837
329	329	hsa:1028	4	1535	-0.0506585300887103	0.013	162.590407542304	0.04	0.00445207450812218
330	330	hsa:1029	3	667	-0.0619553528729273	0.011	84.8186377364039	0.000999000999000999	0.000136468294346143
331	331	hsa:1030	3	1038	-0.0185453961274324	0.229	143.003056143109	0.029	0.0399422461828969
332	332	hsa:1031	3	520	-0.0705603850502195	0.013	59.9123601653696	0.027	0.00314310824140894
333	333	hsa:1032	3	705	-0.0678554731061421	0.018	92.880157904262	0.232	0.0270538043650059
334	334	hsa:1036	5	1823	-0.0172601103551065	0.206	215.228178586779	0.229	0.191239262879259
335	335	hsa:1040	3	426	0.0041671928694977	0.55	51.4858610080536	0.46	0.600714544934418
336	336	hsa:1050	3	855	-0.0332070030819063	0.111	119.615475268075	0.000999000999000999	0.00112075401011522
337	337	hsa:1051	2	170	-0.0420249032788007	0.219	26.1069805617139	0.000999000999000999	0.00206254644748982
338	338	hsa:1054	3	710	-0.010057737879638	0.376	77.8287004569722	0.606	0.56486446373345
339	339	hsa:1056	4	1154	-0.0187462570788212	0.216	128.686836881278	0.108	0.110996978335381
340	340	hsa:1072	2	122	-0.0653628873735297	0.208	18.6495099425391	0.133	0.12691201235554
341	341	hsa:1080	5	2302	-0.0106494669856712	0.263	170.521696283142	0.432	0.360722953399817
342	342	hsa:1081	3	215	-0.0117696262868474	0.394	23.4645924294181	0.000999000999000999	0.00347954316154423
343	343	hsa:1101	3	772	-0.0771114125643953	0.039	77.7372982365849	0.01	0.00345125188934783
344	344	hsa:1109	5	2069	0.0189730947590431	0.864	169.272751051941	0.162	0.415192880623371
345	345	hsa:1111	2	71	-0.077200140767421	0.235	13.187445564881	0.000999000999000999	0.00219668058728871
346	346	hsa:1119	5	634	-0.0456237424921582	0.086	77.7066753008777	0.412	0.153779837374783
347	347	hsa:1129	3	1197	0.00753013390249055	0.639	132.552559581712	0.000999000999000999	0.00533453644446031
348	348	hsa:1131	2	166	0.0120846472954558	0.554	15.0345747839562	0.000999000999000999	0.00470393340243631
349	349	hsa:1132	3	821	0.00740145207161042	0.599	76.0369628596959	0.000999000999000999	0.00503928853910985
350	350	hsa:1133	2	165	0	0.482	29.1211520733418	0.000999000999000999	0.00415962915597097
351	351	hsa:1137	5	2004	0.0506809889012498	0.982	258.389753331146	0.107	0.341815222281251
352	352	hsa:1141	3	369	-0.031914822870683	0.263	67.5995286060085	0.043	0.0619977068417411
353	353	hsa:1143	1	1	NA	1	0.112614243054927	0.142	0.419173807436085
354	354	hsa:1152	7	1347	-0.0137345514715079	0.323	107.157994751606	0.55	0.484618533274908
355	355	hsa:1158	1	1	NA	1	0.356383189304135	0.008	0.0466265098984184
356	356	hsa:1160	8	2165	-0.00718813811832864	0.34	193.672712735273	0.186	0.237834147182368
357	357	hsa:1173	3	53	-0.171943741655321	0.054	5.8994929757488	0.527	0.129749298251031
358	358	hsa:1175	3	53	-0.189643832708074	0.038	6.06866460048864	0.437	0.084657241919381
359	359	hsa:1211	3	53	-0.219448806591908	0.017	3.40077396841915	0.722	0.066282939448737
360	360	hsa:1212	3	53	-0.242281630399158	0.012	6.57919673558954	0.913	0.0604099381101808
361	361	hsa:1213	3	53	-0.249892571668242	0.011	5.51889393493801	0.579	0.0385726562715592
362	362	hsa:1230	2	218	-0.0210553569592766	0.377	57.6658652214732	0.000999000999000999	0.00334602183447573
363	363	hsa:1232	2	218	-0.0193073650607706	0.383	20.2306140281422	0.000999000999000999	0.00339323271875295
364	364	hsa:1234	2	230	-0.0159216918602007	0.384	59.7177178535879	0.000999000999000999	0.00340109203016234
365	365	hsa:1235	2	218	-0.0210553569592766	0.371	27.178620006108	0.000999000999000999	0.00329871555085011
366	366	hsa:1236	2	218	-0.0188306399975417	0.393	51.3846809677857	0.000999000999000999	0.00347170956588036
367	367	hsa:1258	3	630	-0.0444182335732651	0.09	85.9601216801647	0.051	0.0293019874200354
368	368	hsa:1259	6	2411	-0.0028756266840875	0.411	184.172438438829	0.286	0.369203232660664
369	369	hsa:1268	2	133	0.0443183681287053	0.728	16.3365419419057	0.000999000999000999	0.0059826974618914
370	370	hsa:1271	1	35	NA	1	6.099187149353	0.046	0.18763923859468
371	371	hsa:1278	3	799	-0.0752301170252365	0.035	158.752590263325	0.000999000999000999	0.000393746922965313
372	372	hsa:1280	3	799	-0.0742752775527644	0.038	136.584878489503	0.001	0.00042476112713304
373	373	hsa:1281	3	799	-0.0731407035913565	0.035	163.154397085105	0.000999000999000999	0.000393746922965313
374	374	hsa:1282	3	799	-0.0710625235630351	0.043	145.193509071577	0.000999000999000999	0.000474903424107856
375	375	hsa:1284	3	799	-0.0714669261631409	0.041	130.500028984933	0.000999000999000999	0.000454765691963352
376	376	hsa:1285	3	799	-0.0717814615187787	0.043	85.2818629253009	0.001	0.000475335349017641
377	377	hsa:1286	2	149	0.00149993051264129	0.508	17.1004815740657	0.000999000999000999	0.00435734518905614
378	378	hsa:1287	3	799	-0.0769038944534521	0.035	102.708263109673	0.005	0.00168887680220714
379	379	hsa:1288	3	799	-0.0769263612645691	0.034	111.634753783594	0.001	0.000383831101133836
380	380	hsa:1289	3	799	-0.0743988450139079	0.035	158.823458425708	0.000999000999000999	0.000393746922965313
381	381	hsa:1290	3	799	-0.0735788064081378	0.034	166.430707628269	0.000999000999000999	0.000383481602542618
382	382	hsa:1291	3	799	-0.0757805538976027	0.033	152.598835088454	0.000999000999000999	0.000373186895499919
383	383	hsa:1292	3	799	-0.0763871577977614	0.033	157.009010072618	0.000999000999000999	0.000373186895499919
384	384	hsa:1293	3	799	-0.0753761512974969	0.034	166.589137153877	0.000999000999000999	0.000383481602542618
385	385	hsa:1301	3	799	-0.0741854103082965	0.034	142.042677840241	0.000999000999000999	0.000383481602542618
386	386	hsa:1311	3	831	-0.0690594851770893	0.044	122.591190135508	0.000999000999000999	0.00048493716151117
387	387	hsa:1326	2	191	-0.0349239598667443	0.298	29.8286460218532	0.000999000999000999	0.00271487126712688
388	388	hsa:1352	13	723	-0.0569542193631989	0.041	70.2930963544023	0.109	0.0286489294317587
389	389	hsa:1355	14	723	-0.0599071316693085	0.035	68.4599364593702	0.883	0.13835665662889
390	390	hsa:1356	13	723	-0.0569542193631989	0.042	71.4435939055289	0.974	0.171667543551058
391	391	hsa:1364	2	39	-0.0399634102666255	0.388	4.65584421093114	0.001	0.00343554802471631
392	392	hsa:1365	2	39	0.0119890230799876	0.54	5.69252711858655	0.000999000999000999	0.00459886922689219
393	393	hsa:1366	3	358	0.0618340212520321	0.913	44.4642234017283	0.000999000999000999	0.00729649732691537
394	394	hsa:1371	1	2	NA	1	0.343989655913492	0.031	0.138686810309407
395	395	hsa:1373	3	144	0.0748406630688067	0.876	9.60806997104334	0.087	0.272399700582226
396	396	hsa:1374	1	12	NA	1	1.08362577481676	0.046	0.18763923859468
397	397	hsa:1376	5	2147	-0.00213098252046567	0.444	219.420225686589	0.836	0.739048643446336
398	398	hsa:1378	3	440	0.0432027070449391	0.875	58.2512937177631	0.001	0.00703612583765583
399	399	hsa:1380	2	28	-0.199714896505093	0.099	2.06380927065424	0.789	0.277264710491692
400	400	hsa:1385	1	40	NA	1	5.81034168287938	0.106	0.343897515596227
401	401	hsa:1386	1	39	NA	1	5.08074142045969	0.068	0.25080083501881
402	402	hsa:1387	3	1703	-0.00056094221824479	0.487	218.381909725364	0.433	0.539093547528323
403	403	hsa:1390	3	1013	0.0166030755266923	0.74	132.924365583431	0.018	0.070842268336747
404	404	hsa:1392	3	667	-0.0373556869997688	0.127	97.8602622217446	0.034	0.0278293500046689
405	405	hsa:1394	2	161	-0.0962087833216239	0.064	26.8991896943715	0.000999000999000999	0.000681406719676336
406	406	hsa:1398	2	448	-0.0495985192941957	0.119	32.2343834833952	0.613	0.263923860238074
407	407	hsa:1399	2	448	-0.0504029340330687	0.116	28.7624811951407	0.99	0.36337849926107
408	408	hsa:1408	3	261	-0.0258883707142779	0.298	27.658611211655	0.278	0.289191500325352
409	409	hsa:1431	2	53	-0.18315015310093	0.06	5.93725610238892	0.206	0.066661062261134
410	410	hsa:1432	2	792	-0.00886010277442324	0.372	73.72266508687	0.345	0.391831297269915
411	411	hsa:1436	2	408	-0.0199036672988204	0.306	94.3790352683015	0.000999000999000999	0.0027796553812603
412	412	hsa:1437	2	251	-0.054441697348658	0.187	23.9045377680753	0.082	0.0793945864274259
413	413	hsa:1439	3	1189	0.0375647941163234	0.927	281.31816973577	0.000999000999000999	0.00739428957918292
414	414	hsa:1440	2	117	-0.0933792276946884	0.145	18.304887566736	0.156	0.108325388683614
415	415	hsa:1441	3	918	0.0231577489001821	0.771	159.27145309248	0.000999000999000999	0.00629186964928066
416	416	hsa:1445	3	759	-0.0319911513290123	0.186	80.7884545233463	0.146	0.125084806621611
417	417	hsa:1447	4	1749	0.00930048759100639	0.667	132.987593034567	0.009	0.0367113220960787
418	418	hsa:1452	4	1637	-0.00935859750802929	0.333	197.185860583884	0.735	0.589247067444545
419	419	hsa:1453	4	1797	-0.00399505489999549	0.413	178.827614582391	0.395	0.458927662538659
420	420	hsa:1454	3	896	-0.0149398141918852	0.338	101.706818811646	0.087	0.133107921727767
421	421	hsa:1455	5	1997	-0.00508329068450746	0.385	240.371718339969	0.104	0.168883768034386
422	422	hsa:1456	6	2374	-0.00762760228118955	0.341	279.716354147815	0.508	0.476922084959041
423	423	hsa:1457	3	927	-0.0761264383734636	0.008	112.180420606732	0.354	0.0194466985961227
424	424	hsa:1459	3	927	-0.0771785923997635	0.005	86.0048348282961	0.63	0.0212951114023555
425	425	hsa:1460	3	927	-0.0689911862496606	0.016	104.352052416071	0.498	0.0464719397733203
426	426	hsa:1478	9	118	-0.163641671312022	0.009	17.5753537575785	0.045	0.00356870751379738
427	427	hsa:1487	2	46	-0.310407671361194	0.004	2.68446082368111	0.877	0.0233377038892885
428	428	hsa:1489	2	94	-0.159146277236222	0.047	9.56673886978554	0.385	0.0906943045594825
429	429	hsa:1491	3	190	0.085112948153748	0.909	20.0859283096552	0.07	0.238909666209153
430	430	hsa:1493	3	432	-0.0307227991619216	0.258	70.5436760530721	0.000999000999000999	0.00238760841371722
431	431	hsa:1495	2	189	0.0634881280298828	0.85	22.2827232829608	0.000999000999000999	0.00685372892356748
432	432	hsa:1499	2	556	-0.0625738915197387	0.043	52.9547615883178	0.04	0.0126685412996297
433	433	hsa:1500	3	1024	-0.0366067310423067	0.101	74.2442008924532	0.069	0.041579029966048
434	434	hsa:1509	2	15	0.365148371670111	1	3.48466343543571	0.002	0.0144292161968444
435	435	hsa:1511	3	391	0.0299461252500965	0.766	45.1468984707266	0.004	0.020798536259046
436	436	hsa:1520	5	1639	0.0128415026213124	0.735	322.086976008958	0.000999000999000999	0.00603319687904808
437	437	hsa:1524	2	218	-0.0224855321489633	0.364	28.9217484560221	0.869	0.680400006846196
438	438	hsa:1535	3	1048	-0.0292856271305128	0.132	175.121025529364	0.000999000999000999	0.00130993953437947
439	439	hsa:1540	2	83	0.00663918323595248	0.543	17.1593110917564	0.000999000999000999	0.0046214131877436
440	440	hsa:1544	3	860	-0.0109483314601543	0.359	105.771824947968	0.196	0.257115228474913
441	441	hsa:1545	4	1440	0.0265503048811521	0.897	262.388853384309	0.000999000999000999	0.00718447194208391
442	442	hsa:1551	4	1495	0.0298273693059668	0.914	107.79706729029	0.031	0.129307671285896
443	443	hsa:1553	3	233	-0.0735754052819886	0.097	30.5151393256266	0.831	0.283589111827691
444	444	hsa:1555	2	161	-0.0590590173533604	0.197	17.8782965059723	0.438	0.297694286165877
445	445	hsa:1562	4	1064	0.0374463790766655	0.936	114.697045940413	0.000999000999000999	0.007457044284299
446	446	hsa:1571	2	172	-0.00131856833522451	0.499	12.7209775981812	0.502	0.597263469192832
447	447	hsa:1573	3	737	-0.0610608204450332	0.029	62.077442086689	0.988	0.130439147730148
448	448	hsa:1576	2	172	-0.0364458782586903	0.294	17.070693545833	0.965	0.641128620977503
449	449	hsa:1577	1	32	NA	1	4.01180181657768	0.225	0.560622347274986
450	450	hsa:1581	4	1681	0.0184997499366432	0.804	87.9247904601393	0.434	0.716319113912731
451	451	hsa:1583	4	1132	0.0273028876803751	0.855	112.557730211067	0.025	0.103573273521405
452	452	hsa:1586	3	1126	0.0257944340665717	0.841	136.70236997783	0.003	0.0176163595753225
453	453	hsa:1588	3	981	0.0358402330285151	0.895	78.4010185729798	0.002	0.0131127159898418
454	454	hsa:1591	3	34	-0.15186576736877	0.168	4.32170660460592	0.002	0.00302346219772836
455	455	hsa:1592	1	19	NA	1	2.48845127137816	0.065	0.242668920590623
456	456	hsa:1593	4	1320	0.0183838320451619	0.783	161.10567058411	0.168	0.398369675768816
457	457	hsa:1594	4	1007	0.033099027485039	0.846	106.215900993123	0.000999000999000999	0.00682546266842428
458	458	hsa:1603	10	77	-0.160129503542763	0.026	8.1217798445842	0.000999000999000999	0.000300218532994179
459	459	hsa:1604	3	561	0.0579474411671335	0.933	74.3970264286037	0.162	0.436737730621762
460	460	hsa:1605	3	235	-0.0679970020737937	0.1	22.840266859334	0.301	0.135547226227542
461	461	hsa:1606	3	907	0.020248770704955	0.764	123.981115962356	0.000999000999000999	0.00624170618742854
462	462	hsa:1607	2	201	-0.0508636562130808	0.209	12.1190701067777	0.162	0.148486966650232
463	463	hsa:1608	2	201	-0.0489156864006649	0.219	14.8618259942539	0.329	0.261572587006479
464	464	hsa:1609	3	907	0.0202079630251788	0.762	130.603291698715	0.000999000999000999	0.0062273620269624
465	465	hsa:1610	7	2267	-0.0153227965561717	0.221	234.481376826758	0.2	0.182061147653513
466	466	hsa:1612	3	999	0.0240780431053865	0.817	113.586216745091	0.163	0.401659884621421
467	467	hsa:1613	4	1914	-0.0127759980756181	0.29	217.040632635056	0.259	0.269554886169378
468	468	hsa:1616	3	560	-0.0271913380735676	0.252	54.3296187844991	0.975	0.590575330666094
469	469	hsa:1621	2	35	-0.062157979465888	0.341	4.97033851574518	0.15	0.203218581033797
470	470	hsa:1622	5	2136	0.0017725920074362	0.522	331.016816917021	0.038	0.0975982140902067
471	471	hsa:1629	6	2187	-0.0138187632161039	0.195	273.494058795584	0.162	0.140730754241072
472	472	hsa:1630	4	1680	0.00946151526203562	0.652	177.040269969912	0.019	0.0667840426850002
473	473	hsa:1633	4	1162	-0.0613304019903622	0.007	145.874597038729	0.592	0.0268783725995594
474	474	hsa:1634	3	909	-0.00925876437711928	0.383	174.853990871867	0.001	0.00339624314284413
475	475	hsa:1635	3	226	-0.169154250108745	0.002	30.1115531117093	0.084	0.00162817982519825
476	476	hsa:1638	5	2120	-0.000605176105119104	0.492	232.891121985567	0.05	0.115743217366678
477	477	hsa:1643	3	472	-0.00909378046705193	0.397	84.7775328590173	0.001	0.003506134988079
478	478	hsa:1644	5	2241	0.0237612633902453	0.926	179.314819501629	0.162	0.434590762692714
479	479	hsa:1647	2	141	-0.173529744367785	0.016	21.4014328454438	0.005	0.000834678713863232
480	480	hsa:1649	2	155	-0.0944905527403012	0.087	14.5435473882454	0.774	0.249017982234451
481	481	hsa:1654	4	466	0.0131384598665935	0.632	45.0736874773776	0.128	0.284316345438132
482	482	hsa:1675	4	480	-0.0249423855758073	0.276	97.0891109967424	0.000999000999000999	0.00253559054660553
483	483	hsa:1676	4	1297	-0.0273946036662304	0.121	142.244407321736	0.428	0.2051113879477
484	484	hsa:1716	3	196	-0.123033938670308	0.018	24.0073897441408	0.58	0.0580684356717486
485	485	hsa:1718	1	6	NA	1	1.37342279544838	0.004	0.026085843671449
486	486	hsa:1723	2	25	-0.221326697997275	0.13	2.92586573047688	0.063	0.0475416509113495
487	487	hsa:1729	3	620	-0.00876549642449339	0.405	66.4273800165143	0.002	0.00657596581134121
488	488	hsa:1730	2	62	-0.0881683884828192	0.218	7.79192140417157	0.243	0.208609177941888
489	489	hsa:1736	7	28	-0.0449194418380771	0.394	4.84336754026785	0.000999000999000999	0.00347954316154423
490	490	hsa:1737	1	7	NA	1	1.36649115464664	0.002	0.0144292161968444
491	491	hsa:1738	4	553	-0.0525664310314082	0.083	60.1398918932676	0.098	0.0472723879031575
492	492	hsa:1739	2	78	0.00636396421266183	0.535	9.4839267939553	0.013	0.0415094879248348
493	493	hsa:1740	4	1256	-0.0405396517775365	0.049	118.6852179667	0.046	0.0159922401380237
494	494	hsa:1741	4	1256	-0.0386020651479776	0.056	117.041032768528	0.252	0.0742394186513762
495	495	hsa:1742	2	83	-0.0920116009407851	0.163	13.2010402056375	0.014	0.0161627283088514
496	496	hsa:1743	2	24	0.240850894368441	0.924	3.23048112161795	0.007	0.0390724657654448
497	497	hsa:1756	2	92	-0.144201473602042	0.033	11.2630474617682	0.869	0.130527950127332
498	498	hsa:1780	2	22	0	0.487	2.30298375147045	0.029	0.0742862823929351
499	499	hsa:1781	2	22	0	0.483	2.50094872635961	0.188	0.308647512494309
500	500	hsa:1783	2	22	0	0.489	3.22372833906434	0.082	0.169070362873486
501	501	hsa:1785	3	883	0.00126627425828519	0.526	102.367483004932	0.006	0.0213296678086513
502	502	hsa:1786	4	183	-0.0848156830456438	0.074	20.7879129999548	0.635	0.19067698369111
503	503	hsa:1788	3	352	-0.00972948354161835	0.415	52.9521713249932	0.095	0.166900026636295
504	504	hsa:1789	4	636	-0.0424061413402684	0.093	76.3437867613791	0.991	0.311897704838723
505	505	hsa:1793	2	181	-0.0808199010641766	0.105	23.3085106834223	0.026	0.0188464285185138
506	506	hsa:1794	3	1013	-0.0178416989796267	0.28	233.323565882047	0.000999000999000999	0.00256831341402185
507	507	hsa:1796	3	373	-0.0345246753933708	0.241	45.0544025993123	0.062	0.077751880995541
508	508	hsa:1798	12	77	-0.180822944487429	0.019	8.27588495950592	0.000999000999000999	0.000225344006496991
509	509	hsa:1806	4	553	-0.0679103804322522	0.021	105.227708465297	0.959	0.098783749396453
510	510	hsa:1807	6	1700	-0.0118606533733637	0.312	150.316963679757	0.133	0.173542838407253
511	511	hsa:1808	2	57	-0.109785515534976	0.173	8.35108177427382	0.58	0.331040810884978
512	512	hsa:1812	4	1425	0.0131198752751572	0.668	74.6776953160347	0.286	0.507276490626618
513	513	hsa:1813	2	192	-0.00305143969501587	0.479	32.8987068477966	0.000999000999000999	0.00413672700475985
514	514	hsa:1814	2	133	0.0416160286086623	0.721	17.2094762351823	0.000999000999000999	0.0059321308032467
515	515	hsa:1815	2	133	0.0432374323206881	0.721	15.0651736833771	0.002	0.0108751663542521
516	516	hsa:1827	4	1673	-0.0134398203817011	0.248	279.812687341643	0.000999000999000999	0.00230485930610273
517	517	hsa:1841	1	15	NA	1	3.2080340580038	0.000999000999000999	0.00790085392538984
518	518	hsa:1843	2	218	-0.0877037882219715	0.065	34.1979246787621	0.000999000999000999	0.0006910469343118
519	519	hsa:1844	2	218	-0.0874039462109562	0.065	22.8185090715772	0.000999000999000999	0.0006910469343118
520	520	hsa:1845	3	1090	-0.0108221333459878	0.318	139.514626787169	0.022	0.0417130673858932
521	521	hsa:1846	2	218	-0.089202998277048	0.063	32.5759504230386	0.033	0.0149186301335509
522	522	hsa:1847	2	218	-0.0868042621889256	0.067	35.507340257669	0.000999000999000999	0.000710281486919809
523	523	hsa:1848	2	218	-0.0874039462109562	0.066	23.0905157055922	0.379	0.117273626745938
524	524	hsa:1849	3	1090	-0.0112487381096949	0.309	140.353312200253	0.000999000999000999	0.00280389525819429
525	525	hsa:1850	1	9	NA	1	1.76120868586553	0.007	0.0417329159094878
526	526	hsa:1852	2	218	-0.089202998277048	0.065	29.0529618360329	0.739	0.19386087150963
527	527	hsa:1855	2	281	-0.02055127162302	0.342	24.5370710229843	0.515	0.481985543241507
528	528	hsa:1856	2	281	-0.0208130712615298	0.339	29.7631810752421	0.859	0.650467766869723
529	529	hsa:1857	1	23	NA	1	3.05127151954574	0.209	0.536172994646621
530	530	hsa:1869	3	385	-0.122129519096841	0.009	63.4323873405122	0.004	0.000404351698302294
531	531	hsa:1870	2	52	-0.162465914745207	0.097	13.7878366493982	0.000999000999000999	0.000992462048691326
532	532	hsa:1871	2	53	-0.165135383943461	0.089	9.38300125554248	0.000999000999000999	0.000918262495786519
533	533	hsa:1874	3	622	-0.0335781143404079	0.141	86.5055545029861	0.52	0.2648994304827
534	534	hsa:1875	3	622	-0.0302086475179877	0.165	70.4102888030495	0.017	0.019288166630721
535	535	hsa:1892	1	14	NA	1	1.49079763709167	0.027	0.124521797150401
536	536	hsa:1901	4	1587	-0.00563934559029629	0.399	254.974765434124	0.028	0.061382818216406
537	537	hsa:1902	3	1182	0.0168577396883726	0.757	202.060627290517	0.000999000999000999	0.00619147865262632
538	538	hsa:1906	3	880	-0.00266992014757816	0.439	98.1438274816759	0.074	0.143813769435037
539	539	hsa:1909	3	480	0.00994123879594127	0.627	99.8263936804361	0.000999000999000999	0.00524623209348212
540	540	hsa:1910	4	1852	0.0341195108795796	0.951	237.171866516605	0.003	0.01956982314186
541	541	hsa:1917	5	864	0.00860469550952358	0.584	95.7983850443399	0.152	0.303740044691194
542	542	hsa:1938	2	3	NA	1	0.483925380056103	0.315	0.678882531649299
543	543	hsa:1942	3	979	0.00395171382584025	0.557	103.760983875894	0.02	0.0612389533155406
544	544	hsa:1944	3	979	0.00544220550096375	0.584	157.802482524206	0.006	0.0233150907711016
545	545	hsa:1947	3	294	-0.0111861497078036	0.415	35.491286846213	0.002	0.00671809043145412
546	546	hsa:1948	4	1114	-0.0080490215929536	0.367	89.3307456621573	0.068	0.117059636914132
547	547	hsa:1949	4	1114	-0.00482839053321351	0.419	146.601233061488	0.001	0.00367783100833966
548	548	hsa:1950	2	216	-0.0296478234213383	0.279	14.6706434938015	0.884	0.591887360852085
549	549	hsa:1956	2	657	-0.0253640455421468	0.221	60.5750660290924	0.939	0.533849346392106
550	550	hsa:1958	3	361	0.0281034785006779	0.739	45.8453137725093	0.000999000999000999	0.00606202374575527
551	551	hsa:1960	4	934	-0.000245206121485641	0.47	126.913173157407	0.000999000999000999	0.0040679074534354
552	552	hsa:1962	17	2700	0.0465806953632626	0.999	269.468846145145	0.484	0.834872993635621
553	553	hsa:1964	2	12	-0.31209389196618	0.135	1.58616089607275	0.034	0.0293019874200354
554	554	hsa:1965	1	14	NA	1	1.94808798411908	0.019	0.0943030096964982
555	555	hsa:1967	3	73	-0.0847181897100845	0.178	7.28297142226948	0.874	0.445036517836095
556	556	hsa:1968	2	16	-0.307728727448332	0.087	2.67519059361144	0.007	0.00511784860476492
557	557	hsa:1969	3	1149	0.0265448050472434	0.855	134.974107264048	0.022	0.0935490264169376
558	558	hsa:1974	5	1007	-0.0261775368608735	0.129	121.471297846349	0.000999000999000999	0.00128313086649121
559	559	hsa:1975	3	160	-0.119637383499934	0.03	23.2127444631708	0.408	0.066133283063231
560	560	hsa:1977	2	18	-0.209609381840844	0.167	1.25395467604742	0.646	0.348104709476083
561	561	hsa:1978	2	185	-0.0650223823243572	0.151	19.7769517464483	0.918	0.412531788211249
562	562	hsa:1981	3	23	-0.107441128310652	0.291	3.48622650099538	0.12	0.152065968536535
563	563	hsa:1983	5	587	-0.00881669445338729	0.394	47.6083923400597	0.004	0.0117457156931732
564	564	hsa:1992	2	7	-0.534522483824849	0.14	1.19234543254004	0.34	0.192538311844651
565	565	hsa:2001	3	692	-0.0140553809376645	0.314	68.5048913842639	0.005	0.0117069870656064
566	566	hsa:2002	4	1987	-0.0182413378533738	0.204	234.219477451136	0.057	0.0634230573372079
567	567	hsa:2005	4	1954	-0.0160404337809771	0.238	217.637515128721	0.034	0.0470701877785034
568	568	hsa:2017	3	769	-0.0130233642644073	0.328	106.097474210479	0.041	0.0713944218249141
569	569	hsa:2023	2	182	-0.0100708444065896	0.452	21.3778893030042	0.000999000999000999	0.00392974845261363
570	570	hsa:2026	2	182	-0.00888603918228495	0.457	20.9584857987965	0.012	0.0340332681167749
571	571	hsa:2027	2	182	-0.00770123395798029	0.462	19.1076323692426	0.036	0.0847637693471883
572	572	hsa:2033	3	1703	-0.000681282763335367	0.479	155.574373925437	0.47	0.560816224860643
573	573	hsa:2034	2	148	-0.0907785041304679	0.103	27.557422687992	0.014	0.0108751663542521
574	574	hsa:2035	1	2	NA	1	0.299687952447742	0.246	0.590996240790245
575	575	hsa:2036	3	113	0.0295167655081724	0.654	12.7931451339245	0.000999000999000999	0.00544460076950396
576	576	hsa:2037	4	486	0.0390283929214916	0.833	61.2692389263415	0.131	0.350860954982884
577	577	hsa:2041	3	461	-0.0025577155392362	0.452	38.5414003823183	0.076	0.150155856740076
578	578	hsa:2042	4	1408	0.012458990321211	0.692	84.4050276841462	0.157	0.349798783221083
579	579	hsa:2043	3	461	0.000202993296764778	0.477	31.9000161184508	0.913	0.797514771470646
580	580	hsa:2044	3	461	-0.00913469835441502	0.387	41.1341330818478	0.121	0.190178275918629
581	581	hsa:2045	3	461	-0.00564321365006083	0.415	45.0361965263325	0.000999000999000999	0.00364347261568198
582	582	hsa:2047	5	2017	0.0241016165623738	0.873	165.161431233599	0.23	0.523157480237925
583	583	hsa:2048	1	5	NA	1	0.913481387431001	0.044	0.181436888382811
584	584	hsa:2050	4	1317	-0.00209219243387924	0.472	156.100673157407	0.001	0.00408682690216276
585	585	hsa:2051	3	378	0.0272636559727174	0.697	33.2417909012759	0.032	0.107125872107187
586	586	hsa:2052	3	226	-0.093574666214185	0.053	22.0140704178355	0.844	0.183717283013578
587	587	hsa:2053	4	793	-0.0298218620104318	0.169	96.2525393629536	0.911	0.442026903823534
588	588	hsa:2054	4	848	0.0187834957315808	0.735	134.305033198353	0.006	0.0283293133997981
589	589	hsa:2056	3	968	0.0265467211937824	0.806	140.852275812144	0.108	0.299557898373248
590	590	hsa:2057	3	898	0.0216106341411887	0.753	113.115785618948	0.22	0.463486494066299
591	591	hsa:2060	3	908	-0.0129783521604663	0.309	117.054044175866	0.003	0.00740075733195333
592	592	hsa:2064	3	1503	0.0103549918759258	0.652	152.388506979006	0.371	0.585200591385295
593	593	hsa:2065	2	429	-0.0186253399920507	0.311	39.0995088114198	0.16	0.199067061008228
594	594	hsa:2066	2	454	-0.0349718510041979	0.17	47.4859401864085	0.065	0.060833839603753
595	595	hsa:2069	4	1597	0.0202003426169912	0.807	105.347778905755	0.107	0.297848618711264
596	596	hsa:2081	5	2165	0.0322967175082157	0.932	262.714530217854	0.119	0.354800708777539
597	597	hsa:2091	10	1019	-0.0372371068114453	0.079	142.042586643743	0.003	0.00221534574878851
598	598	hsa:2099	2	327	-0.0656252813881361	0.08	33.9827271004886	0.238	0.0944615002727442
599	599	hsa:2100	3	1307	-0.00797327310691702	0.364	114.40231794634	0.016	0.0357929526461431
600	600	hsa:2107	4	79	-0.210129518762215	0.02	6.9552097943625	0.232	0.029570909835132
601	601	hsa:2113	3	1195	0.00395086874577447	0.541	259.512140445435	0.000999000999000999	0.00460638572595697
602	602	hsa:2114	4	1914	-0.00966910041703441	0.337	279.636865442041	0.19	0.240010279655555
603	603	hsa:2122	3	921	-0.0399146650801324	0.095	133.032236194688	0.2	0.0943030096964982
604	604	hsa:2146	23	2708	0.0443603013535601	0.987	394.531131232468	0.53	0.862066192754277
605	605	hsa:2147	2	49	0.0203048301291058	0.618	9.83664515654692	0.000999000999000999	0.00517985349582309
606	606	hsa:2149	2	294	-0.0116939018318229	0.428	29.5385400642476	0.004	0.0126175992181616
607	607	hsa:2150	5	2023	0.0277192710370164	0.941	183.273740781377	0.066	0.234693150677546
608	608	hsa:2151	4	605	0.0630001375229544	0.975	83.4386791919283	0.000999000999000999	0.00772799277983719
609	609	hsa:2152	5	454	0.0566360687587972	0.946	60.4866584471993	0.016	0.0785661213803567
610	610	hsa:2153	6	2028	0.0294496003788732	0.949	217.008380180527	0.04	0.162135598706926
611	611	hsa:2155	6	1390	0.0133186569052486	0.72	145.230762487558	0.000999000999000999	0.00592490146785897
612	612	hsa:2157	1	1	NA	1	0.172119604560673	0.183	0.493783250083751
613	613	hsa:2158	4	454	0.050974882923963	0.923	35.5962080637499	0.001	0.0073728144615549
614	614	hsa:2159	3	49	-0.0181064071578422	0.471	8.14097635394987	0.000999000999000999	0.00407556251266366
615	615	hsa:2160	2	16	-0.160793970206289	0.259	4.36762015315356	0.000999000999000999	0.00239586177534349
616	616	hsa:2161	4	760	-0.00872316456428261	0.388	62.1306259048955	0.806	0.676249743294732
617	617	hsa:2162	3	49	-0.0112626070977351	0.508	11.2696037123337	0.001	0.00436119478807599
618	618	hsa:2165	1	1	NA	1	0.280550119898652	0.003	0.0204274289709421
619	619	hsa:2167	5	2115	-0.00775729436774131	0.336	294.132717061804	0.024	0.0469352666575548
620	620	hsa:2168	5	2136	0.000810280041099489	0.496	188.022779329925	0.322	0.45268499138251
621	621	hsa:2170	5	2115	-0.00626256925224887	0.367	267.794239491901	0.286	0.341562816442269
622	622	hsa:2176	4	92	-0.218954062796086	0.009	13.9414320536603	0.004	0.000404351698302294
623	623	hsa:2178	5	572	-0.0701605950222465	0.041	78.4026968713239	0.007	0.00262778013421274
624	624	hsa:2181	5	2143	-0.000302571981524526	0.477	229.508463600579	0.875	0.782064829177308
625	625	hsa:2182	5	2143	-0.0021708164347196	0.441	297.817144658854	0.071	0.139765597355263
626	626	hsa:2184	8	1803	-0.0261592443340679	0.097	171.406315039363	0.184	0.0897016174924129
627	627	hsa:2185	3	1322	-0.00692914530014791	0.38	211.964470127138	0.000999000999000999	0.00336963910701222
628	628	hsa:2188	4	92	-0.215918304559746	0.015	11.922252511085	0.415	0.0378429069330302
629	629	hsa:2194	4	974	-0.0265509671883487	0.15	104.67475440571	0.741	0.35533261607727
630	630	hsa:2203	4	1720	-0.0310793074344214	0.088	280.693227705637	0.125	0.0606084600680215
631	631	hsa:2207	2	224	0.0220796747419992	0.636	60.2617806080898	0.000999000999000999	0.00531248162916364
632	632	hsa:2208	2	16	-0.353553390593274	0.061	1.58137272645009	0.714	0.180041510019633
633	633	hsa:2212	2	298	-0.0939507307326167	0.011	75.8552718645371	0.000999000999000999	0.000136468294346143
634	634	hsa:2213	2	92	-0.126721956618965	0.074	31.1629398640394	0.000999000999000999	0.000777143783633263
635	635	hsa:2222	5	29	-0.225617197634926	0.09	2.54648334992308	0.585	0.207656287977173
636	636	hsa:2224	2	94	-0.0485563398310774	0.296	8.45388072911954	0.18	0.20950730978652
637	637	hsa:2235	12	723	-0.0602083328447407	0.037	56.0846162112026	0.357	0.0703624523105053
638	638	hsa:2241	3	614	-0.0475489168548171	0.085	77.3109107773052	0.118	0.0561898120103932
639	639	hsa:2243	4	1396	-0.00933854752843826	0.332	170.940022396163	0.006	0.0143794833106809
640	640	hsa:2244	3	454	-0.0410250458238891	0.215	64.8509898708262	0.000999000999000999	0.00202883365283365
641	641	hsa:2245	3	847	0.00893097242913395	0.614	85.8155455388653	0.265	0.458156508141327
642	642	hsa:2246	3	1058	-0.0116798780008039	0.311	174.541741838974	0.001	0.00282254818783915
643	643	hsa:2250	3	955	-0.0147122774708665	0.275	127.193428479323	0.006	0.0122215169852649
644	644	hsa:2251	3	955	-0.0195335884231935	0.213	128.320183835173	0.008	0.0125666197533798
645	645	hsa:2252	3	955	-0.0193708798830616	0.22	158.611820338657	0.000999000999000999	0.00207096318943846
646	646	hsa:2254	3	955	-0.0148749860109983	0.266	105.988558020767	0.033	0.0503462777047719
647	647	hsa:2257	3	955	-0.018497391930775	0.225	70.9865304893222	0.549	0.381854279502771
648	648	hsa:2258	3	955	-0.0172385416465973	0.242	62.512029454348	0.357	0.297958828100115
649	649	hsa:2260	3	1417	0.0407922139096916	0.97	170.013589692109	0.013	0.0677568732767569
650	650	hsa:2261	2	388	-0.0163806835057499	0.357	38.7824044486924	0.001	0.00319078559509792
651	651	hsa:2263	2	405	-0.0210977708523934	0.306	27.7979778413718	0.665	0.527474246140801
652	652	hsa:2264	4	1923	0.049035127566532	0.992	192.576865922767	0.067	0.246654206866754
653	653	hsa:2266	3	454	-0.0389904561207804	0.214	43.3678209268392	0.000999000999000999	0.00202039389136959
654	654	hsa:2268	2	315	-0.020866590096291	0.336	69.0410087322414	0.000999000999000999	0.00302077725258769
655	655	hsa:2271	2	21	-0.138873014965883	0.243	3.14385788050855	0.003	0.00599517704612164
656	656	hsa:2274	8	2589	0.0512059909391305	0.99	298.734333289974	0.346	0.709525997297527
657	657	hsa:2277	3	1326	-0.0132531489250009	0.291	99.4140759320423	0.228	0.24633961857965
658	658	hsa:2308	2	530	-0.0348083494401868	0.147	77.206702871912	0.094	0.0729836801044348
659	659	hsa:2316	3	1081	-0.016254088457998	0.292	124.405620107909	0.000999000999000999	0.00266614268407642
660	660	hsa:2317	3	1081	-0.0189127929271991	0.263	132.765404431726	0.696	0.493864760707274
661	661	hsa:2318	2	236	-0.0212820539752074	0.341	27.1331567844539	0.001	0.00306341717551214
662	662	hsa:2319	5	1645	0.00909512137762044	0.64	181.860672252511	0.057	0.157264955830549
663	663	hsa:2321	2	492	-0.00406813808986882	0.442	85.9349889150303	0.000999000999000999	0.00385268579209699
664	664	hsa:2322	3	1077	0.0247328166982947	0.832	117.992895863496	0.000999000999000999	0.00672638139634382
665	665	hsa:2323	3	238	0.0426378641061315	0.763	36.4020436498959	0.001	0.00624000667785671
666	666	hsa:2324	1	43	NA	1	6.97002675097276	0.027	0.124521797150401
667	667	hsa:2326	5	1963	0.0215001974289346	0.876	325.554419566103	0.009	0.0460655804103291
668	668	hsa:2327	4	917	-0.00199114640691615	0.486	131.504154742783	0.006	0.019938273827461
669	669	hsa:2328	4	917	4.08859631810298e-06	0.518	103.84710235499	0.037	0.0949601971470588
670	670	hsa:2329	2	61	-0.13278576086236	0.17	5.33454339539408	0.825	0.415747105024751
671	671	hsa:2330	3	184	-0.0725800717219248	0.135	14.9137316475885	0.526	0.258826803587625
672	672	hsa:2335	3	791	-0.0845386345981525	0.021	167.810121114605	0.000999000999000999	0.000246964775256796
673	673	hsa:2339	3	95	-0.125326602667786	0.068	5.92664337503393	0.359	0.115045955494489
674	674	hsa:2353	2	503	-0.00807486855482504	0.394	65.3442950581395	0.001	0.00348262890157454
675	675	hsa:2354	2	277	-0.0165098207453996	0.38	32.4498694971043	0.000999000999000999	0.00336963910701222
676	676	hsa:2355	3	899	-0.0317116957235245	0.126	119.256996680165	0.000999000999000999	0.00125625249457501
677	677	hsa:2356	5	393	-0.123485530640568	0.003	42.7134938297439	0.209	0.00525085163886676
678	678	hsa:2357	5	2093	0.010839505057117	0.724	382.771336445797	0.002	0.010914404234307
679	679	hsa:2475	20	2708	0.0581207447591376	0.999	272.595958510542	0.506	0.850351666804623
680	680	hsa:2488	3	56	-0.162671593308422	0.066	8.49390821531988	0.001	0.000701306483851898
681	681	hsa:2492	2	56	-0.0262714733662165	0.419	8.21142670912135	0.000999000999000999	0.00367457522375547
682	682	hsa:2494	4	1001	-0.00645468605596312	0.44	111.117835065831	0.005	0.0156624554209593
683	683	hsa:2520	4	319	-0.00415650125921587	0.482	53.4768862829156	0.000999000999000999	0.00415962915597097
684	684	hsa:2524	1	13	NA	1	2.37901335286399	0.011	0.0606084600680215
685	685	hsa:2525	6	1956	-0.0244877913534737	0.118	226.747442963306	0.568	0.248170067398444
686	686	hsa:2528	2	24	-0.159610599517265	0.164	4.16354925459234	0.101	0.0844850731306816
687	687	hsa:2529	7	1957	-0.0286411257530148	0.082	242.487506079766	0.54	0.182310597738155
688	688	hsa:2530	4	197	0.0448515687596088	0.785	17.9787794939372	0.069	0.21209499197694
689	689	hsa:2531	2	43	-0.102875696057051	0.206	5.02575346688082	0.256	0.207909409435442
690	690	hsa:2533	3	263	-0.0152997059416145	0.388	71.6657641276807	0.000999000999000999	0.00343250332751803
691	691	hsa:2534	2	357	0.0392170504170017	0.797	41.1321479673785	0.065	0.205161715303669
692	692	hsa:2535	4	1982	0.0345465450781253	0.957	266.593635474165	0.459	0.800625762661437
693	693	hsa:2539	4	408	0.0388779956735042	0.827	48.1149457628269	0.001	0.00669680274865187
694	694	hsa:2548	4	1165	-0.0279185004850746	0.152	158.576994587594	0.279	0.17643501737062
695	695	hsa:2549	3	1055	0.0102995393253852	0.64	116.036940237309	0.023	0.0768170289988303
696	696	hsa:2550	4	1768	0.032939279639564	0.933	224.386816662519	0.293	0.627910208415312
697	697	hsa:2554	2	21	-0.181238584976156	0.18	2.39521875848339	0.066	0.0645428397047659
698	698	hsa:2555	4	546	-0.00863993528759705	0.395	25.7948396921093	0.47	0.498264568060357
699	699	hsa:2556	2	21	-0.153355725749055	0.229	2.73781925843815	0.232	0.209061399236809
700	700	hsa:2557	2	21	-0.125472866521954	0.266	3.36846919961994	0.042	0.061382818216406
701	701	hsa:2558	2	21	-0.139414296135505	0.236	1.93058956768618	0.125	0.133439267961273
702	702	hsa:2560	2	21	-0.153355725749055	0.22	1.85256071283142	0.322	0.258376961056222
703	703	hsa:2561	2	21	-0.139414296135505	0.243	3.41966366165958	0.044	0.0592150703677028
704	704	hsa:2562	2	21	-0.139414296135505	0.244	1.0019278515519	0.971	0.578098318652307
705	705	hsa:2563	2	21	-0.167297155362606	0.204	2.72492308388381	0.215	0.180999366228626
706	706	hsa:2564	5	1587	-0.00418955815133726	0.436	203.950904471315	0.199	0.298864106636881
707	707	hsa:2566	2	21	-0.139414296135505	0.24	2.10629128585648	0.058	0.073420046447136
708	708	hsa:2568	3	86	0.0454070664919535	0.715	7.5875747952674	0.091	0.242846557022041
709	709	hsa:2571	6	2301	0.0069390057668156	0.648	239.293297128088	0.209	0.406199248685738
710	710	hsa:2572	5	1729	0.0419145583292684	0.968	171.50579345195	0.084	0.285361347461011
711	711	hsa:2581	4	548	-0.0465097234256433	0.091	72.2726534928966	0.937	0.295191605777144
712	712	hsa:2582	4	891	0.013552797813129	0.693	93.2126638709166	0.055	0.162642322142549
713	713	hsa:2584	5	1933	-0.0247864656906275	0.117	232.580313715953	0.89	0.339684051656652
714	714	hsa:2585	5	1933	-0.0239639843389455	0.127	246.173223859832	0.948	0.375270596021903
715	715	hsa:2588	5	1581	-0.0379047694842549	0.033	195.092938421862	0.106	0.0232811625305453
716	716	hsa:2589	7	1558	-0.0345935195641368	0.046	170.645626668401	0.46	0.102745398939352
717	717	hsa:2593	3	59	-0.0262048612861328	0.402	8.01990628676138	0.066	0.122827339693223
718	718	hsa:2618	2	56	-0.276295822730874	0.011	5.98200530494978	0.233	0.0178553364193913
719	719	hsa:2619	6	1169	0.00441056421603867	0.611	179.234864916071	0.000999000999000999	0.00512813526829754
720	720	hsa:2625	3	449	0.0144885255507513	0.618	70.5592437901547	0.001	0.00518441565811307
721	721	hsa:2626	4	1497	-0.0240664001168182	0.106	207.029841049453	0.06	0.0385271430943675
722	722	hsa:2628	2	59	-0.063569479581326	0.262	6.82582317211112	0.265	0.254630097325103
723	723	hsa:2632	2	25	-0.04325904563487	0.44	3.35516723599674	0.116	0.202891433462824
724	724	hsa:2639	2	46	0.00851682478511578	0.533	4.96383245860103	0.277	0.430074044072129
725	725	hsa:2641	3	55	0.00752603336004467	0.527	3.1750675843815	0.019	0.0561115606259581
726	726	hsa:2643	9	2146	-0.00414812017436551	0.413	356.588597044385	0.061	0.117933197017208
727	727	hsa:2645	4	2002	-0.0261448563349091	0.065	277.071553196543	0.343	0.107091643387926
728	728	hsa:2648	2	95	-0.0647617595547482	0.201	11.9432595183694	0.254	0.202933083581896
729	729	hsa:2650	6	1558	-0.0335494946757636	0.049	148.44789357298	0.533	0.121317874481658
730	730	hsa:2651	3	50	-0.0870064631640633	0.245	3.98937808230024	0.104	0.118988069702128
731	731	hsa:2673	3	319	0.114840765936159	0.991	28.4975115374174	0.007	0.0414200353119543
732	732	hsa:2687	3	145	-0.0540542886326682	0.212	22.5925969652068	0.648	0.410071974039468
733	733	hsa:2690	3	898	0.021850895310914	0.754	140.972642464483	0.015	0.0620021889539399
734	734	hsa:2697	3	1468	0.00689839002430459	0.612	218.297374106416	0.012	0.043431473218876
735	735	hsa:2710	5	2195	-0.00355626192937552	0.43	287.198127573296	0.17	0.26432425728375
736	736	hsa:2717	2	54	0.0148853801694634	0.544	9.06471982173559	0.007	0.0250210396250979
737	737	hsa:2719	2	27	0.281635987258073	0.967	2.98964813704642	0.268	0.609100846950824
738	738	hsa:2720	2	112	0.137994283914001	0.972	13.9180419192833	0.007	0.0407576242886678
739	739	hsa:2729	2	26	-0.0920264335333304	0.3	2.39583521853226	0.554	0.464456436508403
740	740	hsa:2730	3	59	-0.0911481195775839	0.192	6.45260327119718	0.262	0.200696393996151
741	741	hsa:2731	2	37	-0.0188656159990226	0.466	3.9732094380599	0.002	0.00743566165673574
742	742	hsa:2734	18	2700	0.0506770339335131	0.993	231.862887125599	0.466	0.819321246588304
743	743	hsa:2735	3	1047	0.0134975114191262	0.731	124.054163650348	0.004	0.0199849632032646
744	744	hsa:2736	3	1079	0.0111651636148883	0.703	127.945197267216	0.059	0.173482373050176
745	745	hsa:2737	3	1047	0.0177028565343473	0.786	106.718781105782	0.004	0.0212605435674813
746	746	hsa:2739	6	1909	-0.0225859895831071	0.149	211.472879999548	0.834	0.383401723363858
747	747	hsa:2740	2	55	-0.181474804397795	0.064	11.8228631741471	0.000999000999000999	0.000681406719676336
748	748	hsa:2744	1	9	NA	1	1.49615560808977	0.124	0.38284674045876
749	749	hsa:2752	5	1768	-0.00770988221746882	0.36	193.803974187856	0.275	0.327950907455907
750	750	hsa:2762	4	37	0.153940282753191	0.863	4.87775356868157	0.007	0.0369055909213841
751	751	hsa:2766	3	402	-0.0903745284640517	0.018	33.8415089697765	0.968	0.0879895745636797
752	752	hsa:2767	3	984	0.00946867953286261	0.636	112.651531818387	0.622	0.76245290541048
753	753	hsa:2769	4	1764	0.0439504286061168	0.981	342.309810056782	0.000999000999000999	0.00776953724710898
754	754	hsa:2770	3	1737	0.0169129104224019	0.771	218.585687946792	0.001	0.00629739090417313
755	755	hsa:2771	3	1737	0.0174817017581934	0.778	274.640477954484	0.011	0.0493016860165311
756	756	hsa:2773	15	2694	0.0460032382424028	0.988	279.871679457741	0.483	0.830244867017087
757	757	hsa:2774	4	1614	-0.0187143639176436	0.173	215.158183507149	0.012	0.0149001003631966
758	758	hsa:2775	1	76	NA	1	12.9925331983531	0.000999000999000999	0.00790085392538984
759	759	hsa:2778	3	1283	-0.0208893170030088	0.216	127.370657208624	0.991	0.544027094799819
760	760	hsa:2779	4	924	-0.0342812489632422	0.106	114.436126396932	0.000999000999000999	0.00107515037183181
761	761	hsa:2780	4	924	-0.0334093733044533	0.11	82.675049203692	0.26	0.130254368849071
762	762	hsa:2781	3	910	-0.012176473069677	0.334	97.4815090263324	0.056	0.0931275503200174
763	763	hsa:2782	2	625	-0.00271143492488375	0.451	44.0324079834404	1	0.810125860705236
764	764	hsa:2783	2	605	0.00607783031324945	0.559	71.6879672936838	0.633	0.721455344312022
765	765	hsa:2784	1	66	NA	1	11.9500483553525	0.000999000999000999	0.00790085392538984
766	766	hsa:2785	1	66	NA	1	12.6281678411456	0.000999000999000999	0.00790085392538984
767	767	hsa:2786	3	1649	0.0074800064029478	0.645	185.601437369921	0.056	0.156071216841653
768	768	hsa:2788	3	1649	0.00633521463389232	0.622	177.945591038141	0.389	0.585294253801701
769	769	hsa:2791	3	1649	0.00806395523193389	0.651	235.759842152294	0.002	0.00995229756322488
770	770	hsa:2796	3	106	0.0327911487690941	0.658	9.31266471925617	0.56	0.736358951235389
771	771	hsa:2797	3	106	-0.0770210703646164	0.182	17.8557950072392	0.000999000999000999	0.00174772788567647
772	772	hsa:2799	2	26	-0.0118262479197817	0.486	4.52566227038277	0.001	0.004193840739955
773	773	hsa:2805	4	1770	-0.0260026487784601	0.085	188.833633551262	0.367	0.139363583059418
774	774	hsa:2806	4	1770	-0.0273177758672447	0.076	139.508438857343	0.314	0.113005209306952
775	775	hsa:2810	3	621	-0.0589722998004472	0.049	71.2971726257805	0.028	0.0104155184485588
776	776	hsa:2811	3	888	0.00408757839603502	0.539	105.45512708126	0.001	0.0045954034980228
777	777	hsa:2814	2	187	0.0201868758425615	0.633	15.8344472502488	0.089	0.218384958970097
778	778	hsa:2815	3	888	0.00451600907283869	0.557	122.893936351914	0.017	0.053592002061624
779	779	hsa:2817	4	1121	0.00452040188084766	0.561	120.000177444349	0.000999000999000999	0.00475633238232426
780	780	hsa:2819	6	2060	-0.0186703599522624	0.14	217.217564445525	0.241	0.148087262350902
781	781	hsa:2820	6	2060	-0.0186897131160236	0.142	199.713089454574	0.359	0.20270693676115
782	782	hsa:2821	3	408	0.0482545737715004	0.885	45.2937721982173	0.003	0.0184026297074853
783	783	hsa:2822	17	1987	-0.0355786313504288	0.036	239.931465478237	0.181	0.0393142507369871
784	784	hsa:2829	2	218	-0.0207375402504574	0.377	26.8909091937381	0.000999000999000999	0.00334602183447573
785	785	hsa:2833	2	218	-0.0220088070857344	0.373	34.9842074529454	0.000999000999000999	0.00331449500621156
786	786	hsa:2846	3	1034	0.0151304195354936	0.734	114.39978848068	0.005	0.0242497584740805
787	787	hsa:2868	3	452	0.0395034746946237	0.767	44.9085115317618	0.019	0.0761961659614958
788	788	hsa:2870	3	452	0.042259109459921	0.784	66.3152938648086	0.005	0.0256433214107047
789	789	hsa:2872	2	181	-0.0323903405485145	0.293	19.0731063648086	0.197	0.222349039324696
790	790	hsa:2877	4	822	-0.014880833821533	0.31	90.5437474549814	0.021	0.0392840470061784
791	791	hsa:2878	3	184	-0.100696502051808	0.043	22.8450557359063	0.3	0.0690218107822272
792	792	hsa:2879	4	275	-0.0629289669550193	0.12	29.2732466236087	0.667	0.282159310692099
793	793	hsa:2882	3	184	-0.109654959035031	0.036	19.2259368496064	0.57	0.100268009908105
794	794	hsa:2885	2	445	-0.0228172252535144	0.261	64.9136489344856	0.000999000999000999	0.00241235694196243
795	795	hsa:2889	2	139	-0.193022468717356	0.000999000999000999	17.964525976156	0.002	2.82185072482266e-05
796	796	hsa:2890	2	230	0.0403013849692991	0.776	25.6845004128586	0.000999000999000999	0.00632766178778878
797	797	hsa:2891	9	2612	0.027441897135248	0.926	229.189234147362	0.371	0.710602316530104
798	798	hsa:2892	1	10	NA	1	1.48955552664917	0.012	0.0650741835503296
799	799	hsa:2893	2	197	0.0409420446077271	0.769	27.0947814394625	0.009	0.0413404826719782
800	800	hsa:2902	2	293	0.0506664052632486	0.836	48.7547082843182	0.001	0.00676063330591933
801	801	hsa:2905	2	284	0.0464780746924859	0.809	35.7323799882364	0.000999000999000999	0.00656309222104121
802	802	hsa:2909	3	867	-0.00740923469260133	0.369	94.2129084754773	0.006	0.0157480811405563
803	803	hsa:2911	2	252	-0.0310830021810307	0.269	33.5974770382771	0.000999000999000999	0.00247818565891018
804	804	hsa:2912	2	138	0.0202420346069034	0.603	21.2532972129219	0.000999000999000999	0.00506893056496185
805	805	hsa:2913	2	138	0.0236979917349112	0.618	18.8337791828794	0.000999000999000999	0.00517985349582309
806	806	hsa:2914	2	133	0.0453993039367225	0.73	26.5335659668808	0.000999000999000999	0.00599713269993316
807	807	hsa:2915	2	192	0.0331376494342619	0.708	21.1823003857117	0.000999000999000999	0.0058380406622771
808	808	hsa:2918	2	133	0.0443183681287053	0.73	19.3926822233282	0.000999000999000999	0.00599713269993316
809	809	hsa:2919	2	238	-0.00432862874415017	0.47	38.5766418197448	0.000999000999000999	0.0040679074534354
810	810	hsa:2920	3	790	0.0131372266176408	0.621	114.72736983644	0.000999000999000999	0.0052019941501718
811	811	hsa:2921	2	82	-0.055041840306365	0.309	13.8008756277712	0.000999000999000999	0.00280389525819429
812	812	hsa:2925	3	319	-0.00639971643620854	0.458	51.0281245758302	0.000999000999000999	0.00397587964073516
813	813	hsa:2931	2	106	-0.0651041874357817	0.239	18.2505556623835	0.011	0.0182482879066732
814	814	hsa:2932	4	2128	0.0256130384676026	0.92	265.733983349923	0.146	0.40397146535771
815	815	hsa:2934	3	385	0.0472868930488943	0.878	49.4505156490363	0.024	0.102405919143252
816	816	hsa:2936	4	275	-0.0548611506787348	0.148	27.8078553411456	0.972	0.422784509365437
817	817	hsa:2937	4	275	-0.0543911132096846	0.147	26.7406300900371	0.456	0.248191688557141
818	818	hsa:2940	2	103	-0.0707596186860219	0.184	12.0859035664193	0.129	0.112526736231304
819	819	hsa:2941	3	264	-0.0681972859229302	0.102	27.4257603949869	0.998	0.334377919742044
820	820	hsa:2947	3	264	-0.0718010483036939	0.09	25.3433958182517	0.875	0.278891313850516
821	821	hsa:2949	2	103	-0.0913978408027783	0.126	12.0632931974482	0.057	0.0426336259659862
822	822	hsa:2950	3	264	-0.0670221460161594	0.105	30.9990166331101	0.757	0.280755880068044
823	823	hsa:2952	3	264	-0.0674922019788678	0.105	17.2479774172021	0.558	0.224821035069477
824	824	hsa:2954	1	1	NA	1	0.257528306261877	0.037	0.158982982554503
825	825	hsa:2977	3	642	-0.108760400771185	0.000999000999000999	56.3571799215003	0.783	0.00637771675792811
826	826	hsa:2978	4	1113	-0.0355384827011433	0.103	179.139651530404	0.006	0.00518441565811307
827	827	hsa:2982	3	642	-0.113620604994202	0.000999000999000999	93.8391562415166	0.971	0.00770027598990595
828	828	hsa:2983	3	642	-0.113270182746147	0.000999000999000999	64.2420044000543	0.294	0.00268239910643542
829	829	hsa:2984	3	385	-0.0815332192340054	0.025	26.9406275450185	0.003	0.000787351683332098
830	830	hsa:2986	3	385	-0.0823701168889549	0.025	34.4944214607275	0.442	0.060833839603753
831	831	hsa:2987	4	1339	-0.0365927167032618	0.07	150.175838866392	0.079	0.0342725480728669
832	832	hsa:2990	2	44	-0.227036018884527	0.041	4.10749027237354	0.298	0.0660363962680912
833	833	hsa:2997	4	1800	0.0109382103438036	0.722	161.144062895892	0.086	0.234654244322012
834	834	hsa:2998	5	2304	0.00182174156461213	0.564	165.344597632567	0.075	0.176093554560935
835	835	hsa:3000	2	259	-0.0694743144983136	0.071	27.9465319880554	0.01	0.00585767436742953
836	836	hsa:3001	3	391	0.00569066039128243	0.549	92.9368651592616	0.000999000999000999	0.00466645152609043
837	837	hsa:3002	4	1323	-0.0259412757702308	0.129	240.672841400099	0.004	0.00442181235692108
838	838	hsa:3012	3	187	-0.0954283070207012	0.092	19.2449290505384	0.000999000999000999	0.000946168208066779
839	839	hsa:3014	3	187	-0.0904276970458173	0.106	28.4915929553886	0.002	0.00200529194805796
840	840	hsa:3017	3	187	-0.104596091974655	0.082	19.8653296364582	0.000999000999000999	0.000852750096408306
841	841	hsa:3028	4	474	0.0149040210583816	0.629	56.2433780031219	0.45	0.640296382921275
842	842	hsa:3029	2	12	-0.408248290463863	0.089	1.16718226857298	0.556	0.198238144057783
843	843	hsa:3030	2	49	0.140028008402801	0.891	3.53335317505203	0.207	0.496218035536338
844	844	hsa:3033	2	80	-0.00597935596059927	0.477	9.15357207492534	0.057	0.125203789768574
845	845	hsa:3034	1	4	NA	1	0.537350975024885	0.007	0.0417329159094878
846	846	hsa:3052	13	723	-0.0552314662064174	0.047	93.2069545459687	0.3	0.074188284790532
847	847	hsa:3054	3	276	-0.116479501986562	0.015	36.9848104809519	0.000999000999000999	0.000181445452405522
848	848	hsa:3055	2	307	-0.00404856713785547	0.484	78.7731434089675	0.000999000999000999	0.00417488688647859
849	849	hsa:3065	3	1004	-0.0314945424028707	0.136	110.837084172247	0.012	0.0121060928046224
850	850	hsa:3066	2	141	-0.183938843000397	0.022	16.5351269115917	0.214	0.029935780757762
851	851	hsa:3067	3	95	-0.0348143844911675	0.363	9.819204709981	0.051	0.092366579350222
852	852	hsa:3071	3	653	0.00263622361139289	0.527	127.084807794543	0.000999000999000999	0.0045009851265149
853	853	hsa:3073	1	8	NA	1	1.79753811872229	0.001	0.00790775527898214
854	854	hsa:3074	1	8	NA	1	2.65621465252013	0.000999000999000999	0.00790085392538984
855	855	hsa:3075	4	480	-0.0286591471955769	0.263	83.2326344900914	0.001	0.00243100276628185
856	856	hsa:3082	3	968	-0.0143272638946727	0.277	92.9451732309293	0.000999000999000999	0.0025437766602742
857	857	hsa:3084	5	2099	0.0484835724536033	0.992	228.752224770383	0.145	0.42275348539595
858	858	hsa:3087	5	1923	-0.00216671387119501	0.46	296.469953935164	0.006	0.0190233678939385
859	859	hsa:3091	2	543	-0.0181006841556369	0.303	76.9628611098543	0.514	0.445352734914314
860	860	hsa:3092	3	53	-0.228640852762056	0.012	4.62635239457968	0.257	0.0209142318069988
861	861	hsa:3098	1	31	NA	1	3.58855886910687	0.001	0.00790775527898214
862	862	hsa:3099	2	234	0.0712331068278843	0.908	22.4258600748801	0.001	0.00726787369086159
863	863	hsa:3101	4	2024	-0.010269460595925	0.285	348.681092915799	0.063	0.0901320648241649
864	864	hsa:3110	3	183	-0.0209982166111402	0.369	27.7889543367116	0.000999000999000999	0.00328292532453624
865	865	hsa:3145	5	109	-0.0357718937175948	0.297	12.681049791874	0.014	0.0269551542903336
866	866	hsa:3155	2	31	0.198286252814374	0.909	3.31291003076645	0.094	0.295632110252884
867	867	hsa:3157	4	487	0.00748167484606163	0.561	51.7935784940277	0.535	0.66135434725592
868	868	hsa:3158	5	2161	0.00776796524143052	0.673	258.326378127545	0.109	0.264996099257154
869	869	hsa:3162	4	1887	0.0318583175084724	0.957	333.0049161275	0.001	0.00760978375835134
870	870	hsa:3163	6	2121	0.015446681794251	0.805	209.97089135033	0.232	0.500130376542317
871	871	hsa:3164	2	149	-0.0890836339735538	0.119	13.9162413186589	0.1	0.0646314808584894
872	872	hsa:3170	3	183	-0.0262013145324847	0.336	23.9961336926522	0.012	0.0262624027607951
873	873	hsa:3172	4	1584	-0.043018060287809	0.028	203.132111205999	0.144	0.0262624027607951
874	874	hsa:3176	3	180	-0.035024198598212	0.302	33.7840749705909	0.092	0.127342267267005
875	875	hsa:3236	3	308	-0.0195524938610655	0.311	18.8609408933581	0.51	0.450659690591774
876	876	hsa:3242	5	1803	-0.0244451268143658	0.116	185.245202640033	0.425	0.197684678058121
877	877	hsa:3265	2	780	0.00105982136587447	0.51	82.683693783368	0.183	0.31467270469882
878	878	hsa:3269	1	2	NA	1	0.686186487648176	0.017	0.0862672128937407
879	879	hsa:3274	4	1283	-0.0202739534884739	0.218	204.049720472129	0.001	0.00205596137794819
880	880	hsa:3276	4	1587	-0.00829342679710649	0.356	169.697482128314	0.116	0.172905924008499
881	881	hsa:3280	4	1056	-0.032970127624871	0.091	108.59109823206	0.061	0.0343816571665586
882	882	hsa:3283	1	24	NA	1	1.93406139715863	0.147	0.4288464357539
883	883	hsa:3284	2	223	0.0939950137662659	0.967	16.7218330071939	0.019	0.0918075491602892
884	884	hsa:3290	2	90	0.0452334553381788	0.714	10.70047393901	0.001	0.00588666410327603
885	885	hsa:3291	17	2700	0.0317055858646239	0.963	311.8601646627	0.466	0.808335001200272
886	886	hsa:3292	1	8	NA	1	1.21807344923536	0.016	0.0821626649078777
887	887	hsa:3293	3	270	0.0965140339916322	0.979	27.2773808648539	0.32	0.676890913064817
888	888	hsa:3294	3	960	0.0362434827551918	0.895	86.6221778572075	0.002	0.0131127159898418
889	889	hsa:3295	6	2147	0.00484523528698357	0.591	196.538464420641	0.234	0.411891174464674
890	890	hsa:3300	4	946	-0.0134819020407241	0.315	82.4883586609809	0.483	0.438622055937378
891	891	hsa:3301	4	946	-0.0105077645382379	0.352	95.6857934236721	0.519	0.493253123997902
892	892	hsa:3303	2	120	-0.13741502279857	0.025	7.3798574506832	0.525	0.0699987286753709
893	893	hsa:3305	2	120	-0.133670744248201	0.026	8.79050255632974	0.924	0.113602335605986
894	894	hsa:3306	4	1761	0.0244273507451741	0.855	165.386241205547	0.02	0.0866743735445973
895	895	hsa:3309	1	3	NA	1	0.728219589856122	0.002	0.0144292161968444
896	896	hsa:3326	3	725	0.00282051689592297	0.543	85.8361736211655	0.017	0.0524799694492752
897	897	hsa:3337	4	972	-0.0106229096270476	0.349	65.455918157859	0.356	0.383355844137615
898	898	hsa:3339	2	112	-0.146458258387916	0.032	20.8699177393449	0.000999000999000999	0.00036286191106486
899	899	hsa:3351	1	13	NA	1	2.79162731313908	0.000999000999000999	0.00790085392538984
900	900	hsa:3352	3	821	0.00427137234056296	0.563	75.076901270247	0.001	0.00477549601349124
901	901	hsa:3354	3	821	0.00719805338872647	0.593	99.8971946826079	0.000999000999000999	0.00499477541055413
902	902	hsa:3356	4	1540	0.0319107500784905	0.911	187.757817448647	0.000999000999000999	0.00728250957413095
903	903	hsa:3358	2	117	-0.0215450918176823	0.403	9.22586403379784	0.795	0.685057421310568
904	904	hsa:3360	4	1283	-0.02107644092727	0.214	206.303928236132	0.000999000999000999	0.00202039389136959
905	905	hsa:3363	2	126	0.0624159639565242	0.81	23.2398072007058	0.000999000999000999	0.0065702052014096
906	906	hsa:3371	3	778	-0.0898678635723238	0.017	125.633133455117	0.000999000999000999	0.000203512531610489
907	907	hsa:3381	3	772	-0.0751595396466024	0.046	80.8902375916207	0.494	0.108719197732784
908	908	hsa:3385	3	390	-0.0824857797613899	0.036	57.3092883279794	0.000999000999000999	0.000403983696617667
909	909	hsa:3394	3	381	-0.0386938415578648	0.198	94.0672301997557	0.000999000999000999	0.00188470741205331
910	910	hsa:3397	2	147	0.0743434548237278	0.864	17.1502529465659	0.004	0.0230433756873074
911	911	hsa:3398	3	495	-0.016388635924415	0.342	73.4521020439327	0.088	0.135533213041321
912	912	hsa:3399	3	334	-0.0367933067614328	0.188	55.3294356845534	0.001	0.00180086489588525
913	913	hsa:3400	2	37	0.256324141863512	0.976	6.30742127409284	0.002	0.0141303343440149
914	914	hsa:3417	5	441	0.0530875478942056	0.901	43.9270958227762	0.011	0.0556414444831231
915	915	hsa:3419	2	10	-0.365148371670111	0.133	1.44303400144783	0.275	0.157579376395678
916	916	hsa:3420	4	128	-0.0843982971297886	0.117	13.8692065480499	0.822	0.321374675642284
917	917	hsa:3421	2	10	-0.304290309725092	0.176	1.52293132408832	0.14	0.115891385217406
918	918	hsa:3422	3	95	-0.0375605896437229	0.342	10.1867386152837	0.36	0.38100663359727
919	919	hsa:3423	3	47	-0.237455640635357	0.047	5.42406371595331	0.724	0.149062089175317
920	920	hsa:3425	5	315	-0.0142356158167702	0.365	33.3317756877206	0.023	0.0485240989080598
921	921	hsa:3426	4	480	-0.0390610417105107	0.186	45.662478932902	0.061	0.0621634861678023
922	922	hsa:3440	2	145	-0.116970760964182	0.07	8.3165635462854	0.634	0.18262220712238
923	923	hsa:3442	2	145	-0.122969261526447	0.061	7.15134942539137	0.987	0.229386662358901
924	924	hsa:3452	2	145	-0.115971010870471	0.069	13.2748344324043	0.497	0.149956911437183
925	925	hsa:3454	2	223	0.110677992280488	0.958	29.8190371629264	0.274	0.613584151544014
926	926	hsa:3455	3	1011	0.0047357580312294	0.562	133.106098288616	0.000999000999000999	0.00476381080232054
927	927	hsa:3456	2	158	-0.100683049275262	0.087	16.0343952187585	0.413	0.155443069784154
928	928	hsa:3458	2	337	-0.0212364370523801	0.315	56.0644405766446	0.000999000999000999	0.00285228799913446
929	929	hsa:3467	2	94	-0.157689560739781	0.047	6.18913870916659	0.028	0.01004523651504
930	930	hsa:3479	1	35	NA	1	6.00605290245227	0.002	0.0144292161968444
931	931	hsa:3480	2	734	-0.0126204686591073	0.348	99.4974521536512	0.058	0.098959428525314
932	932	hsa:3486	3	592	-0.0213312044529442	0.254	68.0979818002896	0.000999000999000999	0.00235455609488993
933	933	hsa:3516	3	1033	-0.00742967032521031	0.375	121.226288203556	0.037	0.0732276243434763
934	934	hsa:3551	1	31	NA	1	4.66246125916207	0.003	0.0204274289709421
935	935	hsa:3552	2	294	-0.0236973060168058	0.302	33.1805902746358	0.000999000999000999	0.00274728978857002
936	936	hsa:3553	2	316	-0.0320418819292543	0.242	60.0589921160981	0.000999000999000999	0.00225501748689115
937	937	hsa:3554	2	193	0.0415157558975924	0.747	22.864489073387	0.002	0.0112144094992536
938	938	hsa:3556	2	87	-0.0444293629611577	0.305	9.2071376459144	0.003	0.00731687664081021
939	939	hsa:3558	3	667	0.00814365765075548	0.58	45.7673633890598	0.059	0.149710618259929
940	940	hsa:3559	3	1148	0.0336243475425752	0.887	201.166287270383	0.000999000999000999	0.00711431161079037
941	941	hsa:3560	3	1148	0.0341367001393571	0.895	252.0244024862	0.000999000999000999	0.00717044882549465
942	942	hsa:3561	3	1154	0.0315199687727716	0.88	251.195023357615	0.000999000999000999	0.00706513244028581
943	943	hsa:3562	2	117	-0.106024331445011	0.111	12.8092600499955	0.08	0.0508287090511652
944	944	hsa:3566	3	905	0.0165823528560947	0.682	210.146342101394	0.000999000999000999	0.00564914049261695
945	945	hsa:3567	2	95	-0.161117565746794	0.046	6.01360877974844	0.168	0.0453085312470518
946	946	hsa:3569	2	417	-0.0287104434310768	0.246	67.2447360532983	0.000999000999000999	0.00228826165484694
947	947	hsa:3570	3	984	0.0297076667941719	0.857	107.048318591078	0.000999000999000999	0.00690314967404849
948	948	hsa:3572	1	35	NA	1	6.27356687177631	0.209	0.536172994646621
949	949	hsa:3574	2	117	-0.102619880435309	0.123	25.3889587197991	0.000999000999000999	0.00122930275870107
950	950	hsa:3576	2	387	0.00888424831117767	0.589	53.9614825581395	0.000999000999000999	0.00496506633583053
951	951	hsa:3577	2	219	-0.014047728756258	0.408	25.4328122172202	0.000999000999000999	0.00358895014648194
952	952	hsa:3579	2	219	-0.0176377038828573	0.387	40.1158174316804	0.000999000999000999	0.00342465438197658
953	953	hsa:3586	2	168	-0.0743374278864087	0.164	27.7154655121708	0.000999000999000999	0.00159193761777982
954	954	hsa:3587	3	898	0.0194311221015373	0.73	222.737426194462	0.000999000999000999	0.00599713269993316
955	955	hsa:3588	3	898	0.0211901770941693	0.75	111.493899024975	0.001	0.00614657801357545
956	956	hsa:3589	2	94	-0.160602993732663	0.044	13.3854437664012	0.441	0.0958999244470183
957	957	hsa:3590	3	898	0.0191822801757504	0.725	107.400415544973	0.401	0.649880116652836
958	958	hsa:3592	1	43	NA	1	5.43313670708533	0.015	0.0779955761681989
959	959	hsa:3594	4	1937	0.0247645297655775	0.79	245.976926579043	0.318	0.59826189743102
960	960	hsa:3595	3	906	0.0160256890846541	0.684	104.591174582617	0.000999000999000999	0.00566370595826331
961	961	hsa:3596	2	95	-0.160410909756676	0.045	14.3229960806714	0.565	0.118786167919433
962	962	hsa:3597	3	898	0.0183413660817116	0.713	138.741810695865	0.011	0.0458669139012469
963	963	hsa:3598	3	898	0.0182469777650338	0.712	91.8886109005972	0.024	0.0866255452113
964	964	hsa:3600	2	94	-0.154047769498677	0.053	23.7848745305855	0.000999000999000999	0.000574275286385112
965	965	hsa:3601	3	898	0.0178265207180145	0.714	179.666547427835	0.000999000999000999	0.00588149625026359
966	966	hsa:3605	3	99	-0.0965659317814074	0.133	7.58304112749977	0.052	0.0413156148903901
967	967	hsa:3606	2	267	-0.0590272104960728	0.12	46.067821209619	0.001	0.00120336225782187
968	968	hsa:3612	2	140	-0.0316864630289298	0.323	9.72379832707447	0.721	0.572244555073001
969	969	hsa:3613	2	140	-0.0087324898111224	0.449	10.9678952979368	1	0.808528843666707
970	970	hsa:3614	3	268	-0.143288245217914	0.002	32.9999547552258	0.888	0.013024103542716
971	971	hsa:3615	3	268	-0.146829077492974	0.003	34.8179703759841	0.853	0.0178314669890977
972	972	hsa:3620	3	575	0.00097061800471106	0.516	92.7144453839019	0.001	0.00442181235692108
973	973	hsa:3624	2	31	-0.0429338790741092	0.392	9.23439691543752	0.000999000999000999	0.00346387342822648
974	974	hsa:3625	3	265	0.0449332868930134	0.789	23.3561421194914	0.073	0.221995241393485
975	975	hsa:3626	4	1200	-0.0163814463313138	0.216	133.597991697584	0.14	0.136037353364765
976	976	hsa:3627	2	116	0	0.523	29.5138604538051	0.000999000999000999	0.00447080285193163
977	977	hsa:3628	4	1703	0.0421253573262188	0.971	233.648733711881	0.275	0.619608279190503
978	978	hsa:3630	4	2123	0.0200796457950792	0.819	324.896847570356	0.035	0.130485327697804
979	979	hsa:3631	3	953	0.00571481787774211	0.589	117.24678762103	0.037	0.105176645699141
980	980	hsa:3632	2	145	-0.0534768653605771	0.258	13.0616085365578	0.443	0.362195537615399
981	981	hsa:3633	2	228	-0.024747110023783	0.352	17.194877019048	0.466	0.460551620911391
982	982	hsa:3635	2	167	0.0208815805028418	0.63	34.2283751187675	0.001	0.00527296816530458
983	983	hsa:3636	2	167	0.0189832550025835	0.621	19.139666376346	0.033	0.100163060545167
984	984	hsa:3643	3	1403	0.0439704025904744	0.98	177.349345506063	0.276	0.624148049975156
985	985	hsa:3645	3	1023	0.0183669994438611	0.76	132.291922111121	0.014	0.0589789542195303
986	986	hsa:3651	2	183	-0.0458316839611793	0.236	28.1180895676862	0.000999000999000999	0.0022050270407314
987	987	hsa:3659	3	812	-0.0201040413977539	0.225	143.023740781377	0.000999000999000999	0.00211297919342748
988	988	hsa:3661	3	773	-0.0246331298854098	0.258	70.4001073149489	0.018	0.0295924002751403
989	989	hsa:3663	3	714	0.0192775550012511	0.684	113.169039425165	0.000999000999000999	0.00566370595826331
990	990	hsa:3665	3	808	-0.0205046044663851	0.231	122.800693941725	0.000999000999000999	0.0021632520802559
991	991	hsa:3667	3	1466	0.016547018187851	0.733	221.923456446249	0.057	0.174448777030384
992	992	hsa:3672	3	1049	-0.0683219817930007	0.016	185.203832656547	0.000999000999000999	0.000192510231145776
993	993	hsa:3673	1	65	NA	1	10.6465004581033	0.034	0.148967421648443
994	994	hsa:3674	3	1104	-0.0621546621673402	0.02	167.056624541897	0.000999000999000999	0.000236179376318549
995	995	hsa:3676	3	1121	-0.0629274377337991	0.019	223.101204783504	0.000999000999000999	0.000225344006496991
996	996	hsa:3678	3	1126	-0.0694234123536977	0.012	233.203846795539	0.000999000999000999	0.00014783140949262
997	997	hsa:3679	3	1049	-0.0693362807105459	0.017	102.251022956067	0.045	0.00625436056396537
998	998	hsa:3680	3	1083	-0.0669101195657568	0.023	120.594927778029	0.01	0.00215680918727945
999	999	hsa:3682	2	151	-0.161982655126831	0.011	15.6785705196362	0.014	0.0015058979251548
1000	1000	hsa:3683	2	220	-0.130535148373175	0.015	50.0382834415437	0.000999000999000999	0.000181445452405522
1001	1001	hsa:3684	2	347	-0.0643159766791182	0.077	88.619810283006	0.000999000999000999	0.000805592664341822
1002	1002	hsa:3685	2	360	-0.101221045883712	0.058	67.0051897169939	0.000999000999000999	0.000623228660109445
1003	1003	hsa:3688	2	517	-0.0395910294719277	0.21	83.3037260485476	0.000999000999000999	0.00198658794284893
1004	1004	hsa:3690	2	426	-0.0729322475841312	0.095	50.033676251018	0.718	0.251365043077891
1005	1005	hsa:3691	3	1250	-0.0402649055578285	0.08	166.164397594109	0.914	0.264376573086266
1006	1006	hsa:3693	3	1250	-0.0427461251143772	0.069	153.500036054429	0.003	0.00196293789529267
1007	1007	hsa:3694	2	316	-0.0366279326608629	0.284	56.6321967469007	0.000999000999000999	0.00260097919372494
1008	1008	hsa:3695	3	1275	-0.0404821067567253	0.076	195.591779731472	0.011	0.00676063330591933
1009	1009	hsa:3696	3	1250	-0.0407855549073994	0.08	92.25423109334	0.576	0.187885498180355
1010	1010	hsa:3702	2	247	0.00585092694978571	0.518	61.3831235578228	0.000999000999000999	0.00443303200270492
1011	1011	hsa:3703	3	19	-0.198826969354487	0.152	3.51164699461587	0.000999000999000999	0.00148699269699557
1012	1012	hsa:3704	2	180	-0.113452670219296	0.033	15.5514277554067	0.192	0.038405712308642
1013	1013	hsa:3705	2	23	-0.397621386243772	0.011	2.73303745136187	0.469	0.0323315175737565
1014	1014	hsa:3706	2	179	0.0683682866958346	0.89	23.2297996222061	0.089	0.280059052387326
1015	1015	hsa:3707	1	15	NA	1	1.23191764319971	0.447	0.80692291791275
1016	1016	hsa:3708	3	1303	0.00943956560024982	0.671	180.348649867659	0.069	0.188558923994188
1017	1017	hsa:3709	2	328	0.0855022001584115	0.979	33.8873765666003	0.031	0.13641850343558
1018	1018	hsa:3710	4	2114	0.0323570850272196	0.961	198.33149644263	0.388	0.740713769828437
1019	1019	hsa:3712	2	35	-0.261090151531786	0.037	4.48321701655959	0.272	0.0563462283872981
1020	1020	hsa:3716	2	393	-0.0369337052121114	0.205	70.420117523301	0.000999000999000999	0.00194422329293465
1021	1021	hsa:3717	2	369	-0.024454306018457	0.309	74.6360347762646	0.000999000999000999	0.00280389525819429
1022	1022	hsa:3718	2	360	-0.0249143103139574	0.311	68.6594468260791	0.000999000999000999	0.00282003899344929
1023	1023	hsa:3725	2	486	-0.0485202513125414	0.106	41.0160958284318	0.04	0.0274039341212903
1024	1024	hsa:3726	2	137	-0.129137510193973	0.043	22.7225003676138	0.000999000999000999	0.000474903424107856
1025	1025	hsa:3728	2	107	-0.125854204529115	0.06	11.6795609560221	0.174	0.0580684356717486
1026	1026	hsa:3732	2	49	0.143104943811563	0.87	7.76885222491177	0.026	0.108325388683614
1027	1027	hsa:3745	2	133	0.12755042534603	0.968	12.2842276717039	0.013	0.067643141560838
1028	1028	hsa:3758	4	807	0.00559693973039452	0.561	72.4729563501041	0.269	0.436289731075972
1029	1029	hsa:3759	4	1213	0.0182704360743915	0.754	140.89201203511	0.006	0.0289461748525747
1030	1030	hsa:3760	2	227	0.0942584468026872	0.965	26.1976051375441	0.001	0.00766536407064341
1031	1031	hsa:3761	3	319	-0.0223236434635403	0.324	27.6271052959008	0.581	0.502614545613785
1032	1032	hsa:3762	2	222	0.0731770109351548	0.914	25.0371636333816	0.002	0.0133526859692769
1033	1033	hsa:3763	3	1056	0.024803078049203	0.829	129.88365589087	0.004	0.0222470308743073
1034	1034	hsa:3778	5	2307	-0.0102261040589671	0.27	244.54917541399	0.68	0.494801229026099
1035	1035	hsa:3779	4	1834	-0.00300779946653743	0.454	281.344420895168	0.037	0.0854429505233876
1036	1036	hsa:3784	5	2340	-0.0236054171310907	0.091	259.204577074473	0.62	0.218623639371696
1037	1037	hsa:3791	2	486	-0.00963198048471731	0.396	87.4184349832594	0.000999000999000999	0.00349520275267631
1038	1038	hsa:3795	4	1103	-0.0330233717591699	0.106	116.394489893449	0.653	0.254064276850666
1039	1039	hsa:3798	4	1539	-0.000244738556106381	0.536	146.578372432359	0.093	0.199331031097642
1040	1040	hsa:3799	1	2	NA	1	0.355435876843725	0.109	0.350588406246076
1041	1041	hsa:3815	3	1371	0.0446822785486029	0.973	167.427030783413	0.007	0.0407925524013101
1042	1042	hsa:3816	4	743	0.0151672072010653	0.687	104.963256294679	0.000999000999000999	0.00568554320808545
1043	1043	hsa:3817	4	743	0.0101789393140167	0.631	131.945287756764	0.000999000999000999	0.00527569215536676
1044	1044	hsa:3818	1	3	NA	1	0.422788378879739	0.139	0.413286107073351
1045	1045	hsa:3824	3	522	-0.0235805724978985	0.319	105.281289589177	0.000999000999000999	0.00288448626054794
1046	1046	hsa:3827	4	780	0.0125438211117199	0.675	95.3073272497964	0.000999000999000999	0.00559811510790385
1047	1047	hsa:3845	18	2703	0.0433664811770902	0.981	281.113287259072	0.475	0.821804364591391
1048	1048	hsa:3897	3	17	-0.159198555977376	0.231	1.49175767464483	0.514	0.371740668947682
1049	1049	hsa:3906	5	1952	-0.0273772190907627	0.098	195.568840630938	0.464	0.186010424542811
1050	1050	hsa:3908	3	786	-0.0749698731252945	0.036	95.6074909793231	0.178	0.0387697333075366
1051	1051	hsa:3909	1	21	NA	1	2.76151196724278	0.034	0.148967421648443
1052	1052	hsa:3910	3	786	-0.0726355510642064	0.037	172.473594018641	0.000999000999000999	0.000414192716672494
1053	1053	hsa:3911	3	786	-0.0763912672516007	0.031	73.8074608632703	0.005	0.00151467324336198
1054	1054	hsa:3912	3	786	-0.0739067165430168	0.035	154.337879490544	0.000999000999000999	0.000393746922965313
1055	1055	hsa:3914	3	786	-0.0713412734857812	0.042	82.4837111743281	0.861	0.156210670591625
1056	1056	hsa:3918	2	148	-0.0425157110955178	0.258	20.0119502759931	0.037	0.0539504891945634
1057	1057	hsa:3920	1	1	NA	1	0.14266525653787	0.16	0.45321303419973
1058	1058	hsa:3925	4	1914	-0.0121557408273365	0.295	297.256785302235	0.99	0.651513976993704
1059	1059	hsa:3931	2	67	-0.2215375427351	0.014	7.84026191068681	0.403	0.0348535490318419
1060	1060	hsa:3937	2	305	-0.0170695364009482	0.37	78.8516049169758	0.000999000999000999	0.00329082178769617
1061	1061	hsa:3938	4	1502	-0.0321182298444919	0.066	161.443342938422	0.407	0.124022999140364
1062	1062	hsa:3948	1	12	NA	1	1.7296504558411	0.022	0.105967682163724
1063	1063	hsa:3952	2	94	-0.153319411250456	0.05	9.26035893244955	0.002	0.00102103403719762
1064	1064	hsa:3955	1	2	NA	1	0.509135202696589	0.018	0.0903129033795475
1065	1065	hsa:3973	2	213	-0.032616715233724	0.266	19.675358140666	0.191	0.202194712158633
1066	1066	hsa:3976	2	94	-0.164244784973767	0.045	16.6913182347751	0.003	0.00133788183023599
1067	1067	hsa:3977	3	898	0.0227861977216305	0.763	91.7996363451271	0.416	0.68165503089938
1068	1068	hsa:3983	2	85	0.00213416667470314	0.529	9.815667134196	0.668	0.720961552287329
1069	1069	hsa:3984	2	52	-0.205206016670496	0.028	7.86880217288028	0.019	0.00454267728050724
1070	1070	hsa:3988	6	1185	-0.0114068500678704	0.303	190.603627499774	0.049	0.0773522383246495
1071	1071	hsa:3990	4	1153	-0.0147363935405511	0.272	89.2007432868066	0.957	0.610648481206449
1072	1072	hsa:3991	2	137	0.0103035247495191	0.55	16.8034135768256	0.000999000999000999	0.00467395152751146
1073	1073	hsa:3996	4	1619	0.0182571080471763	0.825	202.539990724821	0.051	0.175381287249439
1074	1074	hsa:4008	3	316	-0.0550537656791808	0.094	31.9248144964257	0.23	0.104514030411591
1075	1075	hsa:4023	4	1574	0.0275583096280826	0.903	217.310124649353	0.003	0.0187223750143167
1076	1076	hsa:4035	5	1574	0.0272036893727347	0.892	258.114993835399	0.036	0.142529930436237
1077	1077	hsa:4036	2	12	0.0371134809512603	0.573	1.13294964822188	0.419	0.582632068709731
1078	1078	hsa:4046	3	654	-0.00716024098944721	0.423	136.872328437472	0.000999000999000999	0.00370563968323997
1079	1079	hsa:4047	2	8	-0.654653670707977	0.034	1.28998082752692	0.051	0.0127576005106817
1080	1080	hsa:4048	4	742	-0.0582187065681197	0.027	66.4256013313275	1	0.124521797150401
1081	1081	hsa:4049	4	1228	0.0149882050768799	0.728	144.161344278798	0.011	0.0466651324096495
1082	1082	hsa:4050	3	144	0.0512499121713303	0.78	23.5812511311194	0.001	0.0063618489778589
1083	1083	hsa:4052	2	48	-0.0333136269565986	0.425	5.84944023730884	0.003	0.00977263160297397
1084	1084	hsa:4055	2	144	0.00484602710556383	0.543	12.0293016469098	0.084	0.186442901440199
1085	1085	hsa:4060	2	48	-0.130691921137425	0.141	11.9626115566465	0.003	0.00370892253428231
1086	1086	hsa:4066	6	2305	0.00779193356349208	0.668	328.316796839652	0.168	0.357686887245455
1087	1087	hsa:4067	2	410	-0.010166376554094	0.424	83.6614390100443	0.000999000999000999	0.00371339987981991
1088	1088	hsa:4082	4	1710	0.00437660207033651	0.574	291.741251498733	0.002	0.00891965461028531
1089	1089	hsa:4085	4	588	-0.137853356605761	0.001	85.5311185073749	0.015	0.000181611905352931
1090	1090	hsa:4086	3	1101	0.00109578639768995	0.5	104.744919860194	0.004	0.0144292161968444
1091	1091	hsa:4087	1	29	NA	1	3.32842545357886	0.008	0.0466265098984184
1092	1092	hsa:4088	2	368	-0.0467610197583688	0.125	42.0794865849244	0.644	0.283319596611888
1093	1093	hsa:4089	1	33	NA	1	3.45561063478418	0.067	0.248105198192608
1094	1094	hsa:4090	2	195	-0.0261822272272166	0.329	26.8331584811329	0.104	0.149697118246096
1095	1095	hsa:4091	4	1630	0.021510504755008	0.817	145.921284697086	0.426	0.715376704807453
1096	1096	hsa:4092	3	766	-0.0283621885102707	0.172	91.5678190887702	0.002	0.00308735490180327
1097	1097	hsa:4093	2	195	-0.0261822272272166	0.332	32.1910036422043	0.01	0.0222698644468984
1098	1098	hsa:4094	3	163	-0.0862551696549794	0.118	41.8405906422496	0.000999000999000999	0.00118422317801413
1099	1099	hsa:4116	7	552	-0.0558030935133862	0.065	86.3171969731246	0.052	0.0226117929448668
1100	1100	hsa:4121	2	6	-0.730296743340221	0.069	1.6923567437336	0.065	0.0287354702738691
1101	1101	hsa:4124	2	8	-0.436435780471985	0.14	2.02827162134648	0.02	0.0192587804130427
1102	1102	hsa:4128	2	132	-0.031797789451212	0.338	13.2696044192833	0.141	0.192714882028889
1103	1103	hsa:4129	2	132	-0.0290125816160693	0.351	17.2436134173378	0.044	0.0798537379157598
1104	1104	hsa:4137	2	205	-0.0511727599703614	0.181	18.2120580151118	0.115	0.101412374306347
1105	1105	hsa:4141	3	91	0.0215305960266194	0.599	12.8431512136911	0.036	0.104299246181312
1106	1106	hsa:4143	3	180	-0.13918507210064	0.013	16.8299220658764	0.292	0.024954172883698
1107	1107	hsa:4144	3	180	-0.144343896122161	0.011	17.4897336779477	0.458	0.0316927788570986
1108	1108	hsa:4145	3	364	-0.057594747986117	0.095	44.9394130056103	0.53	0.200833897821814
1109	1109	hsa:4149	3	939	-0.0566061867467059	0.008	119.648238140214	0.504	0.0262624027607951
1110	1110	hsa:4153	1	1	NA	1	0.14717842276717	0.022	0.105967682163724
1111	1111	hsa:4157	2	57	-0.0983322674173318	0.196	7.84148493349018	0.007	0.0104155184485588
1112	1112	hsa:4170	4	1679	0.00599915621208894	0.622	238.045078641073	0.005	0.02106444223918
1113	1113	hsa:4171	5	169	-0.293294150554361	0.000999000999000999	36.8437174803185	0.000999000999000999	1.47879189328458e-05
1114	1114	hsa:4172	5	169	-0.291168830622808	0.000999000999000999	35.2055258008325	0.000999000999000999	1.47879189328458e-05
1115	1115	hsa:4173	5	169	-0.292018958595429	0.000999000999000999	33.002433320514	0.000999000999000999	1.47879189328458e-05
1116	1116	hsa:4174	5	169	-0.29244402258174	0.000999000999000999	29.5529590082345	0.000999000999000999	1.47879189328458e-05
1117	1117	hsa:4175	5	169	-0.292018958595429	0.000999000999000999	36.7350253936295	0.000999000999000999	1.47879189328458e-05
1118	1118	hsa:4179	2	12	-0.0371134809512603	0.524	1.00781674169758	0.57	0.659599688927476
1119	1119	hsa:4190	2	50	-0.102857142857143	0.205	4.17800778775676	0.003	0.00516224129844702
1120	1120	hsa:4193	3	1228	-0.0273474899113665	0.141	139.045637838205	0.414	0.224207803113592
1121	1121	hsa:4194	2	77	-0.018113336514069	0.438	10.7792189338069	0.000999000999000999	0.0038217977250643
1122	1122	hsa:4199	4	1570	-0.022790284450901	0.147	197.516069671297	0.463	0.250964790768696
1123	1123	hsa:4200	5	2148	-0.0211595942372927	0.095	286.504889263415	0.148	0.0740177647799506
1124	1124	hsa:4208	3	1033	0.00435345061638313	0.57	202.367771440367	0.000999000999000999	0.00482357443312407
1125	1125	hsa:4216	3	1093	-0.0169838597109774	0.248	126.908288135689	0.166	0.172497790757091
1126	1126	hsa:4217	2	262	-0.0807675505938551	0.057	44.3211707368111	0.343	0.0964788836087849
1127	1127	hsa:4233	2	509	-0.0189410184092523	0.31	52.9971849267035	0.813	0.599379548250721
1128	1128	hsa:4242	5	1737	0.0140791413882019	0.773	267.370181431545	0.003	0.0163874899728236
1129	1129	hsa:4245	9	1979	-0.0311650764929462	0.059	283.571840925029	0.221	0.0696257879691195
1130	1130	hsa:4247	7	1964	-0.0249595255021759	0.117	220.561575309927	0.202	0.112144958991537
1131	1131	hsa:4254	3	955	-0.0184687339749599	0.222	127.233786817935	0.006	0.0101512701775428
1132	1132	hsa:4258	3	264	-0.0645935235421665	0.117	32.2874457062709	0.452	0.20834468558129
1133	1133	hsa:4259	3	264	-0.0670221460161594	0.106	21.1077560854221	0.783	0.289574939854961
1134	1134	hsa:4282	4	694	0.0225828861065596	0.746	72.9367895156547	0.003	0.0158946624334288
1135	1135	hsa:4283	2	116	0.00518433386692053	0.543	27.8014772418786	0.000999000999000999	0.0046214131877436
1136	1136	hsa:4286	3	1241	0.0381843086297279	0.935	178.750595251561	0.004	0.0246416245566583
1137	1137	hsa:4292	5	44	-0.408446542301846	0.001	4.61579056759569	0.102	0.00103943484995736
1138	1138	hsa:4296	3	1044	0.00510590354974801	0.578	146.218129298254	0.000999000999000999	0.00488322589171153
1139	1139	hsa:4312	3	895	0.00337970047208084	0.497	95.7765056612524	0.01	0.0313325471312018
1140	1140	hsa:4313	3	1138	-0.0283770243675702	0.13	213.514795748122	0.000999000999000999	0.00129207475426517
1141	1141	hsa:4316	4	1134	-0.0218597609447989	0.197	106.880001668401	0.000999000999000999	0.00187618516176143
1142	1142	hsa:4318	3	1338	0.000230119896838295	0.474	227.465641542621	0.000999000999000999	0.00409851498216732
1143	1143	hsa:4323	3	952	0.00413718515356253	0.569	125.535798513709	0.01	0.0351018662255018
1144	1144	hsa:4325	4	322	-0.00751751344066272	0.432	41.823000322369	0.025	0.0597046587644012
1145	1145	hsa:4329	1	18	NA	1	2.49195703443127	0.062	0.234398495424097
1146	1146	hsa:4337	3	9	-0.340206908719886	0.179	0.840956842140983	0.11	0.0970253179668594
1147	1147	hsa:4342	3	912	-0.0269206282150961	0.158	99.2319155223509	0.2	0.140765301805101
1148	1148	hsa:4351	2	52	0.167797659315748	0.916	6.33215814745272	0.005	0.0292481377663207
1149	1149	hsa:4357	3	375	0.0113918448611727	0.604	46.6424404465659	0.013	0.0459105419441633
1150	1150	hsa:4363	4	1137	-0.00837172900238417	0.364	117.243162383495	0.041	0.077676205722953
1151	1151	hsa:4440	7	565	-0.0813646314474767	0.014	75.1037328352638	0.048	0.00558112949012043
1152	1152	hsa:4478	2	114	-0.0990077602215717	0.086	27.5379752115193	0.000999000999000999	0.000890255741793977
1153	1153	hsa:4507	4	89	-0.228242253264422	0.004	7.63600437743191	0.018	0.000758796799604273
1154	1154	hsa:4524	4	383	-0.142696304724603	0.001	28.1677520699484	0.529	0.00452005220471006
1155	1155	hsa:4534	5	2338	0.043836767460926	0.974	269.275250825717	0.462	0.809318881045641
1156	1156	hsa:4544	3	859	0.00701553122913745	0.623	74.3267019104606	0.000999000999000999	0.0052167465385761
1157	1157	hsa:4548	4	712	-0.0657798686333125	0.023	64.0764573058999	0.711	0.083618512996728
1158	1158	hsa:4594	3	97	-0.0261035746725	0.373	10.3620691849154	0.141	0.207488444036029
1159	1159	hsa:4597	5	1708	0.00551506564126429	0.597	237.271475007918	0.144	0.296914571504988
1160	1160	hsa:4598	2	4	-0.235702260395516	0.52	0.697504043751697	0.222	0.364675463839787
1161	1161	hsa:4602	6	2539	0.0337094086070208	0.949	241.162333301285	0.399	0.746374261814519
1162	1162	hsa:4607	3	161	-0.120834219081241	0.031	23.2188100907158	0.46	0.0748692332805828
1163	1163	hsa:4609	3	1468	-0.0234594657545304	0.122	150.450266095828	0.93	0.360383557026918
1164	1164	hsa:4615	3	1007	0.0333008432058089	0.841	189.455328561895	0.000999000999000999	0.00679010326972111
1165	1165	hsa:4616	2	214	-0.102859866922699	0.065	39.4693834268392	0.004	0.00240625552100667
1166	1166	hsa:4620	5	2193	0.0342063143997685	0.954	215.048440893358	0.041	0.165893223302114
1167	1167	hsa:4621	2	113	-0.0997785157856609	0.138	7.49311996651887	0.217	0.135007334163958
1168	1168	hsa:4624	4	1757	-0.00360852602193951	0.404	183.650884252556	0.002	0.00656172638755009
1169	1169	hsa:4625	2	124	-0.0751291196740548	0.165	14.5522690254276	0.046	0.0446362107886912
1170	1170	hsa:4626	2	113	-0.0997785157856609	0.14	7.42700462627816	0.367	0.203901853041495
1171	1171	hsa:4627	3	696	-0.0173294345859309	0.284	117.140770631617	0.000999000999000999	0.00260097919372494
1172	1172	hsa:4628	4	1590	0.00663995102850136	0.579	210.41657217107	0.003	0.0127766698902231
1173	1173	hsa:4629	1	3	NA	1	1.16014529228124	0.000999000999000999	0.00790085392538984
1174	1174	hsa:4635	4	389	-0.102457586926867	0.006	41.2028584800018	0.049	0.00268478765244392
1175	1175	hsa:4636	2	180	-0.117708677769066	0.032	18.8029823375713	0.227	0.0430379261681304
1176	1176	hsa:4637	2	141	-0.106101169013205	0.093	16.2323644353452	0.000999000999000999	0.000955448234324078
1177	1177	hsa:4638	3	1073	0.00676944510429077	0.617	157.025470687042	0.045	0.127274178164672
1178	1178	hsa:4660	4	1478	-0.0123467304913868	0.289	197.47233211361	0.022	0.0385170273260658
1179	1179	hsa:4668	6	1588	-0.0234737701595242	0.142	271.467910850828	0.267	0.161985094598176
1180	1180	hsa:4669	7	220	-0.0860019885490349	0.072	34.3616789487377	0.000999000999000999	0.000758110652975278
1181	1181	hsa:4684	5	1718	0.00244569284804247	0.537	166.807117285766	0.023	0.0666215193751968
1182	1182	hsa:4685	4	884	-0.0134978296238125	0.32	87.730107145281	0.001	0.00289510065989456
1183	1183	hsa:4686	4	83	-0.0464245906874893	0.307	11.4096864819926	0.268	0.287774776578073
1184	1184	hsa:4688	2	265	-0.0762690334073711	0.073	61.1376367240521	0.000999000999000999	0.000767634060990884
1185	1185	hsa:4689	2	265	-0.0766736436641741	0.073	61.0944230160166	0.000999000999000999	0.000767634060990884
1186	1186	hsa:4690	3	960	-0.0196765452682682	0.246	125.595139155959	0.000999000999000999	0.00228826165484694
1187	1187	hsa:4734	3	941	-0.0118718304342728	0.339	166.677990820966	0.000999000999000999	0.00304473813522561
1188	1188	hsa:4741	2	108	-0.137390265483962	0.044	8.44834389987331	0.411	0.0906501678994982
1189	1189	hsa:4744	4	1770	0.00206181288061615	0.522	150.696334749118	0.045	0.111605229482513
1190	1190	hsa:4747	4	1809	0.00166463015663678	0.51	159.980691792598	0.077	0.166398551496102
1191	1191	hsa:4758	3	80	0.0236227592903544	0.591	9.4954875407203	0.034	0.0986079697163388
1192	1192	hsa:4760	3	590	-0.0338240867939157	0.152	43.6655704234911	0.354	0.211052900735343
1193	1193	hsa:4763	2	85	-0.0284521318976946	0.368	8.70125723916387	0.224	0.288164266208455
1194	1194	hsa:4771	3	160	-0.079493822007072	0.121	16.1670232049136	0.058	0.0418222059987806
1195	1195	hsa:4772	2	278	-0.0718136205615741	0.075	45.9485984017283	0.000999000999000999	0.000786640005851228
1196	1196	hsa:4775	2	247	-0.0754192842463432	0.072	18.8975043265315	0.936	0.249163654238821
1197	1197	hsa:4776	4	1767	-0.0139030552565099	0.274	151.843197165415	0.308	0.293032878968713
1198	1198	hsa:4780	3	260	-0.0600147730940315	0.105	28.8294964822188	0.13	0.0722633150878435
1199	1199	hsa:4790	2	678	-0.01050378405239	0.378	134.389876340376	0.000999000999000999	0.00335389689919301
1200	1200	hsa:4791	2	277	0.0109744722326115	0.571	37.578081169125	0.000999000999000999	0.00483103696760661
1201	1201	hsa:4792	2	245	0.0252693864388652	0.685	36.8362280562845	0.000999000999000999	0.00567098649922484
1202	1202	hsa:4793	1	14	NA	1	1.95609418830875	0.338	0.704631771622702
1203	1203	hsa:4794	2	151	-0.0248493979447029	0.346	28.3463035019455	0.000999000999000999	0.00310054411988104
1204	1204	hsa:4800	1	1	NA	1	0.271400778210117	0.081	0.284577796069086
1205	1205	hsa:4801	4	746	-0.0136773309132156	0.334	89.5414519896389	0.116	0.164692196061654
1206	1206	hsa:4802	4	746	-0.0162173047291284	0.296	63.9747831078635	0.988	0.652003576366405
1207	1207	hsa:4803	3	956	-0.0183582319278135	0.22	105.482172145055	0.005	0.0085936896090956
1208	1208	hsa:4804	4	1995	0.0756942967198912	1	177.61084969686	0.024	0.113512834767221
1209	1209	hsa:4809	3	7	-0.0657951694959769	0.506	0.81025119333092	0.047	0.112698766756643
1210	1210	hsa:4832	2	158	-0.113104393990273	0.051	20.7491665064248	0.122	0.0378276686645126
1211	1211	hsa:4833	3	607	-0.0546758370080124	0.039	55.3086209675595	0.136	0.0330932155144269
1212	1212	hsa:4837	4	1278	0.0119840724447862	0.709	232.644190146819	0.053	0.160880781880578
1213	1213	hsa:4842	2	381	-0.0325994916826149	0.221	45.141892560628	0.006	0.0101115302014517
1214	1214	hsa:4843	4	2190	0.0364559063497726	0.965	268.14629544272	0.181	0.47943541282041
1215	1215	hsa:4848	8	105	-0.150577484290559	0.028	11.6581220025337	0.013	0.00324628183527923
1216	1216	hsa:4849	8	105	-0.125102139516326	0.05	11.413953629762	0.022	0.0085936896090956
1217	1217	hsa:4850	8	105	-0.118733303322767	0.069	10.3405545878201	0.03	0.0148630278104291
1218	1218	hsa:4851	2	92	-0.128558780749985	0.079	9.57497978124151	0.129	0.0569294768188727
1219	1219	hsa:4852	3	707	-0.00932218495364551	0.372	70.4829377714686	0.235	0.300465266590196
1220	1220	hsa:4854	2	83	-0.108901777336416	0.123	11.0409352094833	0.243	0.134807303389262
1221	1221	hsa:4860	4	1251	-0.0439085314777657	0.043	154.979882335309	0.902	0.164828706038763
1222	1222	hsa:4862	3	314	0.0414775473351163	0.812	46.0063180085513	0.088	0.260005046707948
1223	1223	hsa:4881	3	385	-0.0809546959187216	0.025	34.1606691419328	0.958	0.113326297575249
1224	1224	hsa:4882	3	385	-0.0843872675894058	0.022	37.2162848667541	0.975	0.103861557090894
1225	1225	hsa:4893	15	2694	0.0439032630170189	0.981	318.407234780789	0.479	0.824784346476758
1226	1226	hsa:4905	6	1587	-0.00402506797100611	0.436	220.043738264637	0.093	0.17051524017264
1227	1227	hsa:4907	4	1330	-0.0403329225479974	0.061	233.328995254954	0.516	0.140336688023467
1228	1228	hsa:4908	3	538	-0.0173981483605293	0.303	75.605263381142	0.000999000999000999	0.00275538612147329
1229	1229	hsa:4914	2	364	-0.0607631457301921	0.077	39.3750098972944	0.579	0.183254081725582
1230	1230	hsa:4915	3	921	0.0375602000868969	0.91	98.2000872375803	0.011	0.0560977485634067
1231	1231	hsa:4916	3	904	0.0339842987067612	0.87	93.0635208352185	0.04	0.15166319864862
1232	1232	hsa:4923	3	319	-0.010825052269757	0.421	39.2933819620396	0.000999000999000999	0.00369011219936354
1233	1233	hsa:4927	7	240	-0.119107623106978	0.022	20.762981008506	0.385	0.0488822738045949
1234	1234	hsa:4928	4	38	-0.0981110156844	0.216	4.32871388901457	0.005	0.00845725777687369
1235	1235	hsa:4931	5	26	-0.211031781861087	0.091	4.4997617579857	0.001	0.000937723245681716
1236	1236	hsa:4942	4	845	-0.0381873825208425	0.086	76.8545656218894	0.375	0.143004150852626
1237	1237	hsa:4952	1	22	NA	1	2.004329359334	0.029	0.131673324020874
1238	1238	hsa:4953	4	917	-0.0150386641753462	0.275	118.181094329699	0.866	0.579860611495754
1239	1239	hsa:4967	2	24	0.104839654057824	0.715	3.11723133087503	0.085	0.230980052514852
1240	1240	hsa:4973	5	2115	-0.00753060345418323	0.336	394.307948658492	0.02	0.0403379230762844
1241	1241	hsa:4982	4	903	-0.01984504038799	0.236	110.361977281468	0.004	0.00751932286587693
1242	1242	hsa:4988	2	162	-0.0275199117321162	0.333	20.203481302597	0.000999000999000999	0.0029967896106389
1243	1243	hsa:4991	2	37	0.00926283357294547	0.54	6.60082020292281	0.000999000999000999	0.00459886922689219
1244	1244	hsa:4998	4	169	-0.299856465803066	0.000999000999000999	35.6784665980454	0.000999000999000999	1.47879189328458e-05
1245	1245	hsa:4999	4	169	-0.301985372198544	0.000999000999000999	19.655603848068	0.874	0.00702293460802094
1246	1246	hsa:5000	3	46	-0.482491853939425	0.000999000999000999	9.23257864107321	0.000999000999000999	1.47879189328458e-05
1247	1247	hsa:5001	3	46	-0.471974320338566	0.002	6.31652678490634	0.000999000999000999	2.82185072482266e-05
1248	1248	hsa:5009	3	754	-0.0156651948567668	0.281	63.1008244446204	0.47	0.399435571221863
1249	1249	hsa:5019	3	154	0.0732909445159028	0.853	14.1449988971586	0.078	0.246843946655818
1250	1250	hsa:5020	3	266	-0.0369842337457903	0.22	41.7728203330015	0.000999000999000999	0.00207096318943846
1251	1251	hsa:5021	3	1062	0.0303271171226129	0.88	87.7956774273821	0.005	0.0282750632474549
1252	1252	hsa:5029	4	1213	0.0173191162973892	0.741	114.415569716541	0.12	0.304108017444676
1253	1253	hsa:5033	7	1954	0.00430058372240002	0.588	175.088286693512	0.097	0.220391246613785
1254	1254	hsa:5048	2	68	-0.119109712190799	0.141	9.56145866324314	0.653	0.311683083192787
1255	1255	hsa:5049	2	68	-0.106380429971935	0.16	4.94073782915573	0.506	0.284477253945944
1256	1256	hsa:5050	1	9	NA	1	1.55692358157633	0.079	0.279526286694694
1257	1257	hsa:5051	3	577	-0.0323347255191921	0.177	43.0328795188218	0.449	0.280725492918715
1258	1258	hsa:5053	5	1811	-0.0199298168436346	0.163	117.876821809112	0.583	0.31868670484862
1259	1259	hsa:5054	3	1032	-0.00998461574573399	0.341	177.739558354448	0.003	0.00806637115522894
1260	1260	hsa:5055	2	7	-0.534522483824849	0.148	0.590275342729165	0.316	0.18999762231044
1261	1261	hsa:5058	7	2560	0.0451537276617829	0.992	202.489703986065	0.42	0.781421960544444
1262	1262	hsa:5062	2	238	-0.0157443758448737	0.407	23.5015920504932	0.002	0.00660442985625685
1263	1263	hsa:5063	2	216	-0.00649521418898622	0.478	21.1202471778572	0.704	0.703014443882054
1264	1264	hsa:5078	4	93	-0.144666830952703	0.046	13.8089306114831	0.005	0.00215680918727945
1265	1265	hsa:5080	4	1749	0.0128563074014493	0.764	184.50742579857	0.157	0.374321359371834
1266	1266	hsa:5091	4	1467	-0.0339453869370048	0.061	144.556815418288	0.951	0.223175430961187
1267	1267	hsa:5095	3	164	-0.0406980363523435	0.254	19.4950937697946	0.805	0.529032185745901
1268	1268	hsa:5096	3	164	-0.0380568658516015	0.266	20.79043186137	0.939	0.596260185571564
1269	1269	hsa:5104	2	19	-0.0786889475364634	0.373	1.63991946430187	0.495	0.496552637866928
1270	1270	hsa:5105	4	1925	-0.0391963184093559	0.036	161.039000288435	0.257	0.0525783345262389
1271	1271	hsa:5106	4	1925	-0.0394464970903854	0.04	204.524392588906	0.258	0.0575202900753444
1272	1272	hsa:5111	2	140	0.0269240745366297	0.652	23.1434747138268	0.000999000999000999	0.00542994555807563
1273	1273	hsa:5130	4	634	-0.044082724754909	0.091	61.9281816973577	0.045	0.0266092631600677
1274	1274	hsa:5132	4	1839	-0.00545722428572394	0.386	127.640781942811	0.021	0.0471376119857904
1275	1275	hsa:5136	3	691	-0.0823368467412467	0.003	93.4481339358429	0.642	0.0139679489937575
1276	1276	hsa:5137	3	690	-0.0839446051009059	0.002	76.2660626018007	0.000999000999000999	2.82185072482266e-05
1277	1277	hsa:5138	4	1557	-0.0336709572276538	0.075	150.310471761605	0.002	0.0014707312895802
1278	1278	hsa:5140	3	918	-0.0514757034077699	0.032	72.5684235306759	0.165	0.0329674180770738
1279	1279	hsa:5141	4	1557	-0.0332970432106893	0.081	219.346994898652	0.56	0.185664132743361
1280	1280	hsa:5143	3	533	-0.0542850859712263	0.059	60.835407287802	0.23	0.0719195589356868
1281	1281	hsa:5145	4	1823	-0.0134653809793587	0.233	217.813493264184	0.003	0.0057778360111956
1282	1282	hsa:5146	3	533	-0.0550876660766709	0.051	33.9560065265587	0.257	0.0699207180703984
1283	1283	hsa:5147	3	533	-0.051179643272835	0.067	40.9943132974391	0.795	0.209463324761044
1284	1284	hsa:5149	3	533	-0.0526147928900629	0.064	30.9426352818749	0.073	0.0297427370523074
1285	1285	hsa:5152	4	1557	-0.0336229331401547	0.074	129.563716660257	0.899	0.246822265837372
1286	1286	hsa:5155	3	1129	0.00555383778947316	0.587	147.359063942177	0.133	0.277162715272629
1287	1287	hsa:5156	2	490	-0.0278337678624206	0.225	91.758607818297	0.005	0.00876371877374148
1288	1288	hsa:5158	3	776	-0.0463422288988765	0.075	60.0914439304135	0.31	0.110703715916559
1289	1289	hsa:5159	2	417	0.017055258076459	0.671	79.8283922269478	0.000999000999000999	0.00556892523297656
1290	1290	hsa:5161	4	1365	-0.0467045251072243	0.013	147.860841920414	0.23	0.0203693208558228
1291	1291	hsa:5162	4	1365	-0.0453947115826744	0.015	105.951865922767	0.279	0.0271031002865453
1292	1292	hsa:5163	2	111	0.046911002980561	0.707	13.5315405562845	0.000999000999000999	0.00583079313729007
1293	1293	hsa:5167	4	1617	-0.0275146990005256	0.107	214.785330513076	0.043	0.0293611968775283
1294	1294	hsa:5168	3	555	-0.0609802118209405	0.044	66.2669243733599	0.083	0.0241487781149429
1295	1295	hsa:5170	15	2694	0.0579895713523053	0.999	260.320690011085	0.499	0.845532313406438
1296	1296	hsa:5173	4	1980	-0.0106395980890141	0.298	173.760719476744	0.176	0.207061193992114
1297	1297	hsa:5187	2	85	-0.132004583572062	0.079	10.6119659702742	0.003	0.00221534574878851
1298	1298	hsa:5207	5	2386	0.00844565671123963	0.695	268.517952278074	0.398	0.632094430655092
1299	1299	hsa:5208	3	1043	0.00592733645821288	0.577	99.5374343950774	0.154	0.303957954696942
1300	1300	hsa:5209	2	127	0.195629283732286	0.999	14.7448625972763	0.000999000999000999	0.00789395157279636
1301	1301	hsa:5210	2	127	0.201812967988192	0.999	15.6696290211293	0.000999000999000999	0.00789395157279636
1302	1302	hsa:5211	2	137	0.149497095128971	0.984	18.1970006956384	0.000999000999000999	0.00779029571894624
1303	1303	hsa:5213	5	2069	-0.0100222501267239	0.298	284.560876136775	0.06	0.0898304164651535
1304	1304	hsa:5214	2	103	0.183310070977188	0.995	13.1471953895575	0.000999000999000999	0.0078663321523807
1305	1305	hsa:5217	3	436	-0.00203315345216089	0.475	49.2931260462854	0.049	0.110797738734187
1306	1306	hsa:5226	3	37	-0.274954679174724	0.024	3.93201477807438	0.66	0.0815002355787184
1307	1307	hsa:5228	2	316	-0.0329345084095013	0.228	34.6881150461497	0.723	0.462017461740158
1308	1308	hsa:5230	2	105	0.0278404665027649	0.624	16.7304811216179	0.000999000999000999	0.00522412032618884
1309	1309	hsa:5236	4	1541	-0.0321541868521852	0.063	155.968474996607	0.107	0.0404429463075241
1310	1310	hsa:5238	5	1126	-0.0146320375983142	0.272	118.409110318071	0.122	0.146198332239092
1311	1311	hsa:5241	2	353	-0.0198394158965156	0.309	40.415584562483	0.411	0.389071096878361
1312	1312	hsa:5244	6	2115	-0.0084398741782457	0.319	225.856602343679	0.327	0.340097858021327
1313	1313	hsa:5255	4	1663	0.00774514307990965	0.632	162.548239412723	0.349	0.553967393124535
1314	1314	hsa:5256	3	582	0.0229060407897869	0.722	53.0706483010587	0.229	0.462907283594784
1315	1315	hsa:5257	2	101	0.153849169502782	0.975	10.906943517555	0.147	0.421753949689401
1316	1316	hsa:5261	3	582	0.0279307326177802	0.771	67.3056093622749	0.045	0.15131043560521
1317	1317	hsa:5265	4	554	0.0340147915650643	0.852	108.444734922179	0.000999000999000999	0.00686785499381696
1318	1318	hsa:5269	2	7	-0.534522483824849	0.14	1.31458762216089	0.035	0.0309607483619412
1319	1319	hsa:5272	5	1316	0.00871968680964518	0.674	195.131728746267	0.000999000999000999	0.00559081986467286
1320	1320	hsa:5277	14	77	-0.184610426036356	0.017	7.50985134263867	0.842	0.0750986471960153
1321	1321	hsa:5279	14	77	-0.200954206208588	0.012	10.1432308162157	0.189	0.0160775274335885
1322	1322	hsa:5281	17	77	-0.193840702709326	0.011	5.92049503438603	0.879	0.0545218510165512
1323	1323	hsa:5283	14	77	-0.174952737752764	0.018	6.91378396185865	0.419	0.0444017743520609
1324	1324	hsa:5287	2	157	0.00141181085184518	0.523	13.1495516525654	0.159	0.289970528917361
1325	1325	hsa:5289	2	200	-0.0690117890024364	0.148	21.3022661976292	0.12	0.0893471241755857
1326	1326	hsa:5290	8	2611	0.0562051814337946	0.994	304.028674582617	0.396	0.760622934144308
1327	1327	hsa:5291	1	138	NA	1	13.0931717152294	0.016	0.0821626649078777
1328	1328	hsa:5292	4	1768	0.0026540741830514	0.523	199.29436462198	0.025	0.0697819714925823
1329	1329	hsa:5293	2	853	0.00247157602532185	0.545	153.814766480409	0.000999000999000999	0.0046364332903902
1330	1330	hsa:5294	2	866	0.00379604570294122	0.568	200.434250152701	0.000999000999000999	0.00480864410317611
1331	1331	hsa:5295	2	855	-0.00210729680171252	0.494	82.4496517566283	0.982	0.836027235667716
1332	1332	hsa:5296	2	855	-0.00127272381093529	0.506	91.6092717853588	0.000999000999000999	0.00434218435048852
1333	1333	hsa:5298	21	2708	0.0637094020657825	1	214.490392554972	0.511	0.854078086965779
1334	1334	hsa:5300	1	1	NA	1	0.145886118903267	0.167	0.465890164916419
1335	1335	hsa:5305	3	1169	0.0348916553066978	0.914	217.22312106936	0.000999000999000999	0.00730348956141328
1336	1336	hsa:5308	3	375	-0.0261858074546787	0.26	36.7177185605375	0.168	0.180436180908787
1337	1337	hsa:5313	4	2004	-0.032107287224706	0.044	257.987266423853	0.262	0.0629771921730445
1338	1338	hsa:5315	2	213	-0.0949132701925634	0.044	24.9247105748349	0.096	0.0273164928224102
1339	1339	hsa:5319	2	347	-0.0925393024566147	0.013	36.1511352196634	0.542	0.0419610099725986
1340	1340	hsa:5320	3	1364	-0.00442782332664821	0.406	124.195178179576	0.000999000999000999	0.0035733503505199
1341	1341	hsa:5321	2	552	-0.0670280632990861	0.028	47.9801382510632	0.17	0.0302141362271167
1342	1342	hsa:5322	2	347	-0.093341202824523	0.013	31.7434684926703	0.123	0.0118939645753634
1343	1343	hsa:5327	5	2029	0.0294182161945746	0.957	255.730594233553	0.188	0.488519654385538
1344	1344	hsa:5328	3	1164	0.0264931874065771	0.865	228.679802732784	0.000999000999000999	0.00695956061631483
1345	1345	hsa:5329	3	1010	0.0263111909435886	0.84	199.74039608972	0.000999000999000999	0.00678302783199441
1346	1346	hsa:5330	3	1574	0.0314157381610894	0.927	246.305492008642	0.001	0.00740075733195334
1347	1347	hsa:5331	1	99	NA	1	12.20291432902	0.362	0.729832206310605
1348	1348	hsa:5332	3	1574	0.0326904824751539	0.933	164.144603005384	0.238	0.556208560797797
1349	1349	hsa:5333	2	368	0.0819719945563764	0.971	44.238900891322	0.023	0.10723613995032
1350	1350	hsa:5334	4	86	0.064042023924812	0.783	10.055907695005	0.061	0.193034355446929
1351	1351	hsa:5336	2	558	0.0707102877396384	0.983	74.4478165154737	0.013	0.0684948276348639
1352	1352	hsa:5337	3	1141	0.00805821495175141	0.621	106.549803185232	0.115	0.259896849333678
1353	1353	hsa:5338	2	236	0.00194766306762639	0.5	28.9145184824903	0.044	0.105967682163724
1354	1354	hsa:5340	3	554	0.0300439026342916	0.821	69.4585289227219	0.000999000999000999	0.0066483669180836
1355	1355	hsa:5345	5	1559	0.0274387332300529	0.864	177.000022622387	0.004	0.0230433756873074
1356	1356	hsa:5346	5	2115	-0.00663299902878154	0.351	223.420755898787	0.03	0.0584786388133657
1357	1357	hsa:5347	2	112	-0.269531116737458	0.006	21.5665154737128	0.000999000999000999	7.80704331013144e-05
1358	1358	hsa:5350	3	1062	0.0282445656384014	0.867	173.813573856438	0.000999000999000999	0.00697365177589918
1359	1359	hsa:5351	5	1587	-0.0101559744867291	0.328	181.435613858474	0.115	0.161349745056301
1360	1360	hsa:5352	5	1587	-0.0110976334241731	0.318	229.638123105375	0.016	0.0319570688645807
1361	1361	hsa:5360	3	315	0.0216697662172868	0.642	28.274320480047	0.003	0.0139679489937575
1362	1362	hsa:5361	3	756	0.01369502797597	0.663	82.2197475058818	0.000999000999000999	0.00551047387628165
1363	1363	hsa:5362	3	756	0.0161474575330351	0.69	63.8109956112569	0.041	0.129150834621886
1364	1364	hsa:5364	3	690	0.0224536693029327	0.775	80.2310049712696	0.002	0.011577725539479
1365	1365	hsa:5371	4	1150	-0.0170416435465875	0.204	154.455559027464	0.000999000999000999	0.00193573583731113
1366	1366	hsa:5372	4	1081	-0.0258458811285338	0.165	142.288542892046	0.224	0.158851087430432
1367	1367	hsa:5373	1	6	NA	1	1.26701132816035	0.01	0.0560517018598809
1368	1368	hsa:5406	4	1153	-0.0139445058086005	0.281	94.1104637023799	0.201	0.218798977233656
1369	1369	hsa:5407	4	1153	-0.0122697087663143	0.302	168.17949520971	0.006	0.0132517432173068
1370	1370	hsa:5408	4	1153	-0.013953607966439	0.286	72.1698587797484	0.294	0.292270853177986
1371	1371	hsa:5409	6	2124	0.0235782223175019	0.906	343.873286354176	0.019	0.087137823543202
1372	1372	hsa:5411	9	126	-0.110272773865921	0.046	14.2811644590987	0.322	0.0772048485271666
1373	1373	hsa:5424	2	129	-0.0740166904012239	0.16	18.4750920448376	0.005	0.00650471906423708
1374	1374	hsa:5430	3	567	-0.0542503100526176	0.049	58.8250950140259	0.733	0.155396500888501
1375	1375	hsa:5431	3	567	-0.0494550217306077	0.06	55.7625829958827	0.146	0.0502610201165364
1376	1376	hsa:5432	3	567	-0.0509379020550847	0.057	52.3531439462492	0.659	0.160834840188625
1377	1377	hsa:5433	2	155	0.042042535137918	0.728	20.4958855533436	0.051	0.159404756586862
1378	1378	hsa:5434	3	567	-0.0552517357262903	0.046	55.2461478316442	0.139	0.0386990150900346
1379	1379	hsa:5435	3	567	-0.0497631527071224	0.057	44.5623444710886	0.645	0.158207477904623
1380	1380	hsa:5436	3	567	-0.0496668617769616	0.057	47.8589366912497	1	0.220288128635412
1381	1381	hsa:5437	3	567	-0.0509186438690525	0.055	58.3303518912316	0.889	0.196464028309269
1382	1382	hsa:5438	4	1656	-0.0288913791876602	0.11	163.009818822957	0.532	0.224622389849624
1383	1383	hsa:5440	3	567	-0.0494165053585434	0.06	60.8147806194009	0.964	0.222688320713453
1384	1384	hsa:5441	3	567	-0.0500327673115728	0.06	54.1668987817844	0.076	0.0291403729088786
1385	1385	hsa:5443	5	2284	0.0313438189606342	0.937	287.975870396344	0.21	0.5166628742253
1386	1386	hsa:5464	2	32	-0.158179259849339	0.159	4.10876207469912	0.006	0.00758892392973626
1387	1387	hsa:5465	1	28	NA	1	2.95252055809429	0.063	0.237171094813208
1388	1388	hsa:5467	3	711	0.0700013192487073	0.989	88.697045233463	0.001	0.0078317092478518
1389	1389	hsa:5468	1	23	NA	1	5.55131535042078	0.000999000999000999	0.00790085392538984
1390	1390	hsa:5469	4	1763	-0.00478377646218077	0.37	183.295473118948	0.605	0.558904000257972
1391	1391	hsa:5471	2	38	-0.00486907778175298	0.484	5.45564668921365	0.013	0.0381828528405022
1392	1392	hsa:5473	2	52	0.022562131409857	0.588	5.34861805492716	0.001	0.0049620047627186
1393	1393	hsa:5494	4	1331	-0.00114515582668843	0.475	118.42891551104	0.031	0.07683812089057
1394	1394	hsa:5495	3	362	-0.0475549727649507	0.126	32.3164886096281	0.649	0.28651940873216
1395	1395	hsa:5498	11	723	-0.057575138653664	0.043	90.8796156739209	0.911	0.166084414040706
1396	1396	hsa:5500	5	2407	0.00287591856949626	0.556	240.606831395349	0.445	0.59298359199447
1397	1397	hsa:5501	5	2407	0.00297409249656742	0.566	278.934448098588	0.551	0.67524654688589
1398	1398	hsa:5507	3	779	-0.0236707182730583	0.235	82.3420533209664	0.882	0.533457636384068
1399	1399	hsa:5509	3	779	-0.0260159593983995	0.21	73.4185332492534	0.624	0.397346388419292
1400	1400	hsa:5515	2	485	0.00331079965816112	0.494	43.1932383098815	0.694	0.70984299402729
1401	1401	hsa:5516	3	1536	0.00854768328415671	0.655	200.422903611664	0.445	0.650805683181447
1402	1402	hsa:5518	3	1536	0.00634967140720573	0.617	189.444764614062	0.007	0.0278347948518304
1403	1403	hsa:5519	1	44	NA	1	5.56011828680662	0.022	0.105967682163724
1404	1404	hsa:5520	2	342	-0.0547864127354577	0.105	31.4803482150937	0.321	0.147968626699029
1405	1405	hsa:5521	2	342	-0.0543646543618206	0.108	32.0513789758845	0.817	0.302450087461936
1406	1406	hsa:5523	2	132	-0.0550078547440675	0.221	10.2876040629807	0.507	0.357299602851882
1407	1407	hsa:5525	2	134	-0.025735187922885	0.369	9.99112212695684	0.813	0.661188229364368
1408	1408	hsa:5526	3	806	0.00655233173934438	0.571	103.138383969776	0.073	0.174137481276145
1409	1409	hsa:5527	2	134	-0.0217417966934718	0.388	15.0882096360058	0.000999000999000999	0.00343250332751803
1410	1410	hsa:5529	2	134	-0.0221855068300733	0.383	17.28346204529	0.087	0.14666462900575
1411	1411	hsa:5530	3	1141	-0.0347517601001402	0.078	121.363775054294	0.093	0.0429886710353328
1412	1412	hsa:5532	3	1141	-0.0352124551080962	0.079	134.409296952764	0.345	0.125441635952138
1413	1413	hsa:5533	3	1141	-0.0322691258906001	0.098	208.114275574609	0.013	0.00976596640161418
1414	1414	hsa:5534	3	1133	-0.0304964542939623	0.104	132.422955925934	0.279	0.131729966959077
1415	1415	hsa:5536	3	262	-0.0717306009546902	0.091	35.4330426827889	0.052	0.0300643234991219
1416	1416	hsa:5538	3	25	-0.0452910813657838	0.416	2.95573505791331	0.276	0.363326555582889
1417	1417	hsa:5557	3	249	-0.121526756021343	0.008	33.4430686419781	0.132	0.00829305005094516
1418	1418	hsa:5562	2	217	-0.0180376738127916	0.353	25.5118682698398	0.275	0.3234802464816
1419	1419	hsa:5563	4	2089	0.00902000238824444	0.67	276.28750014139	0.048	0.142694943803031
1420	1420	hsa:5564	2	197	-0.0510180468952409	0.184	19.0929596303502	0.904	0.464700441501704
1421	1421	hsa:5565	2	197	-0.0510180468952409	0.185	25.8433526943263	0.219	0.170409452869359
1422	1422	hsa:5566	3	1820	-0.00559846868628894	0.39	155.306067465614	0.17	0.246209384812698
1423	1423	hsa:5567	3	1820	-0.0059561664260189	0.386	272.190017447516	0.006	0.0163692881738325
1424	1424	hsa:5568	1	130	NA	1	22.8009647034205	0.000999000999000999	0.00790085392538984
1425	1425	hsa:5569	4	1820	-0.00486877091031885	0.401	246.998571254864	0.09	0.155971577123217
1426	1426	hsa:5571	2	197	-0.050712549608443	0.19	19.6243496063705	0.039	0.0437554930619854
1427	1427	hsa:5573	1	1	NA	1	0.268756786716134	0.085	0.294533841911805
1428	1428	hsa:5575	3	299	0.0148435959904096	0.63	43.4817684768347	0.022	0.0731634512331545
1429	1429	hsa:5576	1	1	NA	1	0.215200406071849	0.129	0.39318463082604
1430	1430	hsa:5577	4	1276	0.00942449775314989	0.679	142.302191967921	0.195	0.400113328481218
1431	1431	hsa:5578	2	862	-0.0158669723009356	0.289	74.739815684101	0.968	0.636114583878996
1432	1432	hsa:5579	2	849	-0.0165265613532992	0.27	141.139897548864	0.01	0.018669159466124
1433	1433	hsa:5580	2	522	-0.033123270999867	0.182	66.5173379388743	0.008	0.0109666827513263
1434	1434	hsa:5581	2	338	-0.0292029377453714	0.249	38.6978815548367	0.017	0.0273656859957377
1435	1435	hsa:5582	2	811	-0.00784448850820422	0.383	103.788525925256	0.001	0.00339624314284413
1436	1436	hsa:5583	2	176	-0.0583373388709308	0.185	32.7496500599493	0.109	0.0988852651434945
1437	1437	hsa:5584	2	325	-0.0404052837582459	0.181	28.4221563659397	0.534	0.322497445990653
1438	1438	hsa:5585	1	3	NA	1	0.433928490634332	0.064	0.239927820519838
1439	1439	hsa:5586	3	828	0.00435892158840682	0.546	102.046851670663	0.000999000999000999	0.00464394059048316
1440	1440	hsa:5588	2	350	-0.0597277561240721	0.109	31.1374677630984	0.535	0.224040161090254
1441	1441	hsa:5591	3	472	-0.00293414884634857	0.465	55.6437589075649	0.311	0.424254167936188
1442	1442	hsa:5593	3	1134	-0.0328196206138685	0.092	79.2745071147407	0.069	0.0384664390436665
1443	1443	hsa:5594	2	999	0.0215472758158696	0.795	112.774213023708	0.018	0.0750816605682712
1444	1444	hsa:5595	3	1906	-0.0118870048084058	0.302	228.850799701384	0.179	0.211782904145043
1445	1445	hsa:5598	3	1385	-0.0258015302659043	0.113	146.840884733282	0.172	0.0960260509087543
1446	1446	hsa:5599	2	808	0.000261053851486324	0.473	102.277081825174	0.000999000999000999	0.00409086627254542
1447	1447	hsa:5600	3	1770	0.00449091732965006	0.566	223.02301545109	0.27	0.439891532662958
1448	1448	hsa:5601	2	808	-0.00618705212409139	0.388	101.265417863768	0.132	0.203414755995369
1449	1449	hsa:5602	1	100	NA	1	12.9315319314994	0.306	0.668356074171105
1450	1450	hsa:5603	2	792	-0.00891375971779598	0.368	83.8163747907429	0.076	0.128000985609308
1451	1451	hsa:5605	2	401	0.00838006198718083	0.585	48.7709143968872	0.131	0.273487430833459
1452	1452	hsa:5606	2	273	-0.0726392227727704	0.085	31.8740951045154	0.019	0.0119968988205266
1453	1453	hsa:5607	2	30	-0.102513565925132	0.29	3.58748006402136	0.085	0.115928417029863
1454	1454	hsa:5608	2	271	-0.0553794577328328	0.147	39.2049093407836	0.005	0.00603849544318231
1455	1455	hsa:5609	2	219	0.0389232382182899	0.765	18.3749950513528	0.193	0.430081695904454
1456	1456	hsa:5610	3	1014	-0.0398837510726442	0.098	90.7469919294634	0.963	0.317142851880228
1457	1457	hsa:5617	2	117	-0.102619880435309	0.123	10.5076499015926	0.329	0.170255532440062
1458	1458	hsa:5618	1	39	NA	1	5.24833230589992	0.062	0.234398495424097
1459	1459	hsa:5621	3	879	-0.00657907598305141	0.434	115.610312415166	0.417	0.490338137818132
1460	1460	hsa:5624	2	32	-0.010182663499532	0.459	5.07240789860646	0.005	0.0162417664894028
1461	1461	hsa:5625	7	2361	0.018510718158418	0.888	218.684366092435	0.092	0.286324075437363
1462	1462	hsa:5630	3	116	-0.0351044013492122	0.326	12.2266247115646	0.322	0.341585357534912
1463	1463	hsa:5631	5	1670	-0.0314352444112871	0.071	144.938257143019	0.895	0.238675462441474
1464	1464	hsa:5634	5	1670	-0.032237036074894	0.064	189.018052664917	0.526	0.147829607279487
1465	1465	hsa:5641	5	1639	0.0157365096412036	0.775	282.979452509954	0.008	0.0377158771189728
1466	1466	hsa:5644	22	2708	0.0675534109401536	0.999	304.58516409714	0.483	0.834146016697605
1467	1467	hsa:5648	7	2084	0.0290296080204975	0.907	286.81630975138	0.022	0.0980604541097099
1468	1468	hsa:5649	3	772	-0.0751346750234459	0.043	48.5307593769795	0.475	0.0998985859109717
1469	1469	hsa:5663	3	1043	-0.0345981257381551	0.133	92.3630772950412	0.123	0.0836431919596205
1470	1470	hsa:5720	3	433	-0.0251224830938705	0.299	65.1059858836304	0.000999000999000999	0.00272298089808901
1471	1471	hsa:5723	2	26	-0.0920264335333304	0.293	3.17572504750701	0.094	0.126474052896624
1472	1472	hsa:5724	4	1462	0.0241640340104315	0.855	267.781820508325	0.028	0.113288977617724
1473	1473	hsa:5727	5	1997	-0.00527643214460677	0.376	294.802300838159	0.106	0.168291255364346
1474	1474	hsa:5731	3	319	-0.00360835075658567	0.474	33.6979303343589	0.213	0.332468983705856
1475	1475	hsa:5732	2	54	-0.134351949434064	0.142	8.21602683015112	0.752	0.345654167286104
1476	1476	hsa:5733	4	1213	0.0201520031663596	0.783	181.256146926749	0.003	0.0165692953316943
1477	1477	hsa:5734	4	1283	-0.0231316999612688	0.191	225.359513562121	0.000999000999000999	0.00182494425212576
1478	1478	hsa:5737	4	1213	0.0172070694545353	0.743	155.425276134513	0.001	0.00609617718334216
1479	1479	hsa:5739	2	54	-0.127089681897087	0.157	9.84424274386933	0.000999000999000999	0.00153083065705595
1480	1480	hsa:5742	3	796	-0.0511340632803018	0.046	74.5702990679576	0.996	0.187072313148651
1481	1481	hsa:5743	3	1533	-0.0208935274969017	0.192	176.350928366211	0.002	0.0034041093140646
1482	1482	hsa:5745	2	54	-0.127089681897087	0.157	5.76761011446928	0.147	0.110059877555357
1483	1483	hsa:5747	2	639	-0.0545781016570885	0.139	47.5504443885169	0.999	0.413011751443099
1484	1484	hsa:5770	3	815	-0.0151420938002619	0.315	95.3522645009501	0.755	0.579394061903998
1485	1485	hsa:5777	2	420	-0.0287457694581775	0.285	54.8958111822459	0.000999000999000999	0.00260913681342476
1486	1486	hsa:5778	3	1090	-0.00950676865789071	0.328	187.454876821102	0.000999000999000999	0.00295675008548605
1487	1487	hsa:5781	3	1294	0.0224351906252302	0.783	132.253430826396	0.339	0.617506732045908
1488	1488	hsa:5787	3	556	-0.0632143586195797	0.043	94.7053695649715	0.085	0.0241656143240274
1489	1489	hsa:5788	3	560	0.0235949192758084	0.702	141.35725132341	0.000999000999000999	0.00579453427702161
1490	1490	hsa:5792	3	895	-0.0173091317576743	0.274	91.8521386639218	0.036	0.0554244696934166
1491	1491	hsa:5801	2	218	-0.0871041041999409	0.066	25.1425662835942	0.072	0.0301713494397723
1492	1492	hsa:5803	2	3	-0.816496580927726	0.321	0.592161484254818	0.011	0.0234676409661487
1493	1493	hsa:5805	2	5	-0.316227766016838	0.395	0.477044639625373	0.265	0.340915480678778
1494	1494	hsa:5817	2	3	-0.816496580927726	0.312	0.866918859153018	0.000999000999000999	0.00282810603755466
1495	1495	hsa:5818	3	800	-0.0478980050682431	0.065	141.500627064293	0.000999000999000999	0.0006910469343118
1496	1496	hsa:5819	2	94	-0.127245687781555	0.068	8.43261215048412	0.061	0.0269003150447744
1497	1497	hsa:5822	10	240	-0.120124546637682	0.02	22.9354576226133	0.091	0.013302232175766
1498	1498	hsa:5831	3	65	0.170670922373872	0.942	7.59397198217356	0.009	0.0489204398259063
1499	1499	hsa:5834	3	541	-0.00160335089994177	0.471	48.5304907361325	0.219	0.337460281144915
1500	1500	hsa:5836	4	1614	0.0053507460494379	0.571	163.90647834472	0.035	0.0981817741370748
1501	1501	hsa:5837	4	1614	0.00432460586884721	0.554	156.676512589358	0.058	0.142598694719067
1502	1502	hsa:5863	2	89	-0.0240118274038931	0.395	6.50619712017012	0.624	0.591668936198509
1503	1503	hsa:5864	5	1212	-0.0227536958084243	0.18	176.590483185911	0.036	0.0391329453006443
1504	1504	hsa:5868	1	5	NA	1	0.422668197448195	0.418	0.782610467819185
1505	1505	hsa:5869	3	288	0.0189467885776775	0.657	25.741657287802	0.007	0.0293504334795616
1506	1506	hsa:5871	1	1	NA	1	0.251278164871957	0.134	0.403328674190184
1507	1507	hsa:5878	2	40	0.143452969919603	0.846	5.99727753710071	0.054	0.186665150722547
1508	1508	hsa:5879	2	653	0.00603852348186394	0.586	66.5137445140711	0.006	0.0233829164478438
1509	1509	hsa:5880	2	523	-0.00391124317597924	0.476	115.442373710524	0.000999000999000999	0.00411380608305233
1510	1510	hsa:5881	2	516	-0.0151199726591038	0.355	53.5355008879287	0.397	0.417091000108328
1511	1511	hsa:5885	4	77	-0.0369943018247203	0.349	11.1152893403312	0.001	0.00312719308388089
1512	1512	hsa:5888	5	44	-0.334423867968826	0.003	9.06465266152384	0.000999000999000999	4.11125807281596e-05
1513	1513	hsa:5889	5	44	-0.422220056068246	0.000999000999000999	6.27957594335354	0.001	1.48017083499474e-05
1514	1514	hsa:5894	1	49	NA	1	4.72301361302145	0.052	0.205738601140837
1515	1515	hsa:5896	3	540	-0.0351029360906969	0.142	58.6072209245769	0.043	0.0372373395467916
1516	1516	hsa:5897	3	540	-0.039248369285718	0.122	28.1024214437607	0.962	0.368813443242915
1517	1517	hsa:5898	2	149	-0.122877173073594	0.041	11.0006553422767	0.806	0.145728060027303
1518	1518	hsa:5899	3	919	-0.00778500282391409	0.359	124.700850743145	0.001	0.00320665555284188
1519	1519	hsa:5900	2	214	-0.0586595181160391	0.141	26.2830703952131	0.11	0.0801288523808201
1520	1520	hsa:5901	5	211	-0.101881144059983	0.048	24.7752812245498	0.937	0.184474742886453
1521	1521	hsa:5903	3	11	-0.611576629725151	0.011	1.46861143787892	0.281	0.0209546945635372
1522	1522	hsa:5905	4	11	-0.653885297590252	0.01	1.22768867070853	0.712	0.0423273145813348
1523	1523	hsa:5906	3	1508	0.0168430455281279	0.762	253.005634388291	0.000999000999000999	0.0062273620269624
1524	1524	hsa:5909	2	50	-0.118367346938776	0.22	3.55187596145145	0.578	0.389403230616191
1525	1525	hsa:5914	1	3	NA	1	0.668308439281513	0.038	0.162266426531719
1526	1526	hsa:5921	21	2708	0.0450468462604771	0.986	321.962660336169	0.53	0.861722503511829
1527	1527	hsa:5922	2	151	-0.0236498492784027	0.37	21.362273493349	0.003	0.00866176874266026
1528	1528	hsa:5923	1	39	NA	1	5.61892518211022	0.037	0.158982982554503
1529	1529	hsa:5925	3	890	-0.110407120322261	0.000999000999000999	113.198036376798	0.365	0.00325131232489603
1530	1530	hsa:5933	3	711	-0.0582947960172127	0.021	82.4151717039182	0.985	0.100908596919537
1531	1531	hsa:5934	3	714	-0.0712151353853329	0.014	85.0385499615419	0.084	0.0091088684410987
1532	1532	hsa:5957	4	448	0.0109224323172905	0.549	52.5114547043254	0.000999000999000999	0.00466645152609043
1533	1533	hsa:5959	2	51	-0.0295461550301786	0.426	5.94133449461587	0.204	0.299206232636096
1534	1534	hsa:5962	2	91	-0.0304534425536296	0.388	6.98542269930323	0.726	0.638574077368073
1535	1535	hsa:5966	5	1377	0.0108397340732688	0.626	167.095767634151	0.000999000999000999	0.0052388631010844
1536	1536	hsa:5970	2	678	-0.01146946004281	0.381	103.613226461406	0.000999000999000999	0.003377506264024
1537	1537	hsa:5971	2	71	0.0792317234191953	0.766	15.7040108078454	0.000999000999000999	0.00625604511751697
1538	1538	hsa:5973	1	5	NA	1	1.06048802144602	0.088	0.301876824876346
1539	1539	hsa:5976	4	518	-0.0659668003036294	0.025	44.0197337910596	0.329	0.04770974567967
1540	1540	hsa:5978	3	53	-0.181873405606181	0.051	5.12648247330558	0.509	0.120741458912669
1541	1541	hsa:5979	2	198	-0.125532441383597	0.02	15.6035504422677	0.126	0.0175984108711962
1542	1542	hsa:5993	2	13	0.261488180184245	0.86	2.30834384331735	0.000999000999000999	0.00692431248289994
1543	1543	hsa:5994	4	746	-0.0229953247435023	0.219	69.0321860012668	0.561	0.380459667255794
1544	1544	hsa:5997	4	1315	-0.00114982347045542	0.487	192.093133539951	0.000999000999000999	0.00419775801243716
1545	1545	hsa:5998	3	748	0.0475096107899732	0.925	95.9537980160166	0.023	0.10318848591122
1546	1546	hsa:6010	2	92	0.0280096687843878	0.619	12.3094473916388	0.000999000999000999	0.00518723532696733
1547	1547	hsa:6091	4	589	-0.0513604234365526	0.058	66.4086854413628	0.000999000999000999	0.000623228660109445
1548	1548	hsa:6093	2	318	-0.0021210578417768	0.49	26.5618192075378	0.085	0.174032605366881
1549	1549	hsa:6095	1	5	NA	1	1.2006973350828	0.033	0.145571174678017
1550	1550	hsa:6096	2	14	-0.419710824446042	0.044	1.0789690978192	0.105	0.0294634058513648
1551	1551	hsa:6117	6	515	-0.103047415711156	0.009	61.653021361189	0.000999000999000999	0.000113460109219431
1552	1552	hsa:6118	5	75	-0.184373386866409	0.024	9.24295595421229	0.000999000999000999	0.000279043905565221
1553	1553	hsa:6119	5	75	-0.186692548965358	0.022	8.74428714030404	0.000999000999000999	0.000257702584723935
1554	1554	hsa:6120	3	47	-0.138920341230844	0.147	4.02199744367026	0.874	0.392114547078504
1555	1555	hsa:6121	4	373	-0.0369527869678661	0.193	22.5222321509366	0.362	0.255791733401284
1556	1556	hsa:6184	3	19	-0.183532587096449	0.178	3.39882773617772	0.008	0.0107573025035731
1557	1557	hsa:6185	10	77	-0.167594748463172	0.02	9.57074020450638	0.059	0.00913584419179539
1558	1558	hsa:6194	3	154	-0.12813382402417	0.03	12.6980943466655	0.902	0.124738445637841
1559	1559	hsa:6195	3	1285	0.00142537393555513	0.496	169.695045273052	0.000999000999000999	0.00426626106819173
1560	1560	hsa:6196	2	264	-0.0155725098937929	0.376	32.4522377782554	0.11	0.173109841777622
1561	1561	hsa:6197	2	264	-0.0146762503315602	0.385	39.9723533220975	0.172	0.24599225129727
1562	1562	hsa:6198	2	154	-0.150429850302221	0.009	20.8696490984979	0.011	0.00101181868007514
1563	1563	hsa:6199	2	154	-0.154000885324232	0.008	24.3434771174554	0.091	0.00598795252311081
1564	1564	hsa:6237	3	1467	0.0214716880707057	0.823	208.610137798615	0.075	0.233633213895524
1565	1565	hsa:6240	3	249	-0.11013743096095	0.015	30.0492510575966	0.123	0.0134597842227484
1566	1566	hsa:6256	4	2115	-0.00744278966572387	0.34	154.98602572731	0.769	0.612201784418029
1567	1567	hsa:6257	1	55	NA	1	4.80060627997466	0.114	0.361557478686991
1568	1568	hsa:6258	4	2114	-0.0126986148617729	0.244	247.329966603701	0.033	0.0468774135777394
1569	1569	hsa:6261	1	7	NA	1	0.815196305764184	0.433	0.795428599574187
1570	1570	hsa:6262	2	247	0.00431261315281361	0.521	18.55119375509	0.402	0.5368644436917
1571	1571	hsa:6272	3	455	0.0253340688750063	0.748	39.6338347491177	0.106	0.280256794908273
1572	1572	hsa:6296	6	1476	0.0508633722462394	0.981	169.446007431454	0.039	0.16311251968737
1573	1573	hsa:6300	3	1770	0.0033972160883754	0.549	261.184109469731	0.019	0.0580273727950543
1574	1574	hsa:6301	5	6	-0.389249472080761	0.231	0.720113705773233	0.107	0.116176425608841
1575	1575	hsa:6303	2	30	-0.291494517846513	0.036	4.40406481879468	0.839	0.135911382697489
1576	1576	hsa:6307	1	3	NA	1	0.81474880666908	0.006	0.0366959748585245
1577	1577	hsa:6319	2	62	0.123957611080265	0.877	9.69904307302506	0.018	0.0812763017162879
1578	1578	hsa:6323	2	222	0.0718424757813222	0.911	24.6365331757307	0.000999000999000999	0.00728250957413095
1579	1579	hsa:6332	4	1920	4.31705221900647e-05	0.503	208.083933297892	0.389	0.5148666081045
1580	1580	hsa:6337	4	1141	0.00377435729571006	0.56	103.371845590897	0.231	0.393921388401951
1581	1581	hsa:6338	4	1141	0.00107395827458218	0.513	131.810315525744	0.028	0.0753108858304092
1582	1582	hsa:6342	2	68	0.0861842939967648	0.786	8.66825188331373	0.102	0.282492532103851
1583	1583	hsa:6344	4	1283	-0.0227399850195813	0.195	174.161185922088	0.001	0.0018607896448831
1584	1584	hsa:6346	3	243	-0.0122306875505334	0.421	37.6229936770428	0.000999000999000999	0.00369011219936354
1585	1585	hsa:6347	3	243	-0.0118877710771539	0.421	52.4921875	0.000999000999000999	0.00369011219936354
1586	1586	hsa:6352	3	872	-0.000467523025189632	0.485	193.143805566238	0.000999000999000999	0.00418251265351603
1587	1587	hsa:6354	3	243	0.00137166589351776	0.501	39.7352813093838	0.000999000999000999	0.00430424763492853
1588	1588	hsa:6355	3	243	0.00240041531365608	0.508	52.5933307788888	0.000999000999000999	0.00435734518905614
1589	1589	hsa:6356	3	243	-0.00640110750308288	0.451	51.9746417179441	0.000999000999000999	0.00392205221396244
1590	1590	hsa:6357	3	452	0.00280198217224197	0.523	68.2524481664555	0.000999000999000999	0.00447080285193163
1591	1591	hsa:6361	3	243	-0.00880152281673895	0.439	26.4221577798389	0.237	0.339487211283575
1592	1592	hsa:6362	3	243	-0.00948735576349783	0.425	42.816890863949	0.000999000999000999	0.00372115772026324
1593	1593	hsa:6363	3	452	-0.00087214014632697	0.493	82.4362331463216	0.000999000999000999	0.00424344499094661
1594	1594	hsa:6364	3	243	-0.00468652513618568	0.469	33.2746668853497	0.000999000999000999	0.00406025026867149
1595	1595	hsa:6366	2	73	0.0773752646081841	0.804	9.35969595511718	0.002	0.0119518846860264
1596	1596	hsa:6367	3	243	-0.0153169358109483	0.394	43.8514161614333	0.000999000999000999	0.00347954316154423
1597	1597	hsa:6368	3	243	-0.0161170742488337	0.4	32.1568304056194	0.000999000999000999	0.00352649171276299
1598	1598	hsa:6370	3	243	-0.0128022150061658	0.414	34.2348755203149	0.002	0.00670389985016343
1599	1599	hsa:6372	3	243	-0.011201938130395	0.423	31.9318253155823	0.000999000999000999	0.00370563968323997
1600	1600	hsa:6373	2	116	0	0.52	28.6155862591621	0.000999000999000999	0.00444814610219319
1601	1601	hsa:6376	3	243	-0.00731555143209472	0.442	33.238802625328	0.000999000999000999	0.00385268579209699
1602	1602	hsa:6382	2	265	0.00993390808467028	0.51	39.1701055051579	0.000999000999000999	0.00437249816145383
1603	1603	hsa:6383	2	32	-0.313965457902235	0.011	5.60977301262329	0.108	0.00918975506095353
1604	1604	hsa:6385	3	1034	-0.0495998560229373	0.086	102.122779471315	0.016	0.0104418785663121
1605	1605	hsa:6387	3	452	0.00992755272946658	0.577	82.432331491494	0.003	0.0127385259408261
1606	1606	hsa:6390	3	28	-0.196092002222922	0.115	4.55731381775405	0.01	0.00893319233709803
1607	1607	hsa:6396	8	122	-0.0891614337702227	0.097	12.160589963578	0.721	0.255980640844459
1608	1608	hsa:6400	2	4	NA	1	0.882365707854493	0.013	0.0694564769797678
1609	1609	hsa:6401	3	357	0.00741153146953312	0.569	56.3348141570898	0.000999000999000999	0.00481611014600731
1610	1610	hsa:6402	4	349	-0.0642086829694616	0.15	72.1698135349742	0.000999000999000999	0.00146941180282734
1611	1611	hsa:6403	5	357	0.010490966086751	0.603	61.7624811951407	0.000999000999000999	0.00506893056496185
1612	1612	hsa:6404	6	2036	0.0277582299796311	0.903	317.394041687404	0.024	0.104713343023248
1613	1613	hsa:6405	5	17	-0.192470304013816	0.179	2.13477216428377	0.021	0.02474776109983
1614	1614	hsa:6419	5	550	-0.0455642822135757	0.086	57.6001471869062	0.666	0.221078119807875
1615	1615	hsa:6422	3	342	-0.00720900049896113	0.46	47.8477449721745	0.000999000999000999	0.00399123920245209
1616	1616	hsa:6424	3	342	-0.00350601663610678	0.497	61.6662222310198	0.014	0.0415243921612721
1617	1617	hsa:6426	5	927	-0.0791778361169111	0.006	119.24169617003	0.182	0.00853916088661209
1618	1618	hsa:6427	2	12	-0.165144564768954	0.306	2.13598953149036	0.000999000999000999	0.0027796553812603
1619	1619	hsa:6428	2	12	-0.220192753025272	0.244	3.02445833521853	0.000999000999000999	0.00227164775949352
1620	1620	hsa:6430	5	927	-0.0747135305413356	0.007	104.617249711565	0.169	0.00915606710398531
1621	1621	hsa:6431	5	927	-0.0740908081526011	0.007	117.589271474301	0.362	0.0176821410034088
1622	1622	hsa:6432	4	152	-0.0308000118466049	0.334	21.5549497783006	0.000999000999000999	0.00300478847933776
1623	1623	hsa:6446	4	1861	0.0145294550065373	0.76	276.036522430097	0.018	0.0723921026176562
1624	1624	hsa:6448	3	19	0	0.493	2.18663610759207	0.012	0.0362656404471343
1625	1625	hsa:6452	3	687	0.0615634568535938	0.974	73.5375453861641	0.000999000999000999	0.00772106512191189
1626	1626	hsa:6455	3	908	-0.0195043288611923	0.23	116.943159838476	0.022	0.0318091273061548
1627	1627	hsa:6456	3	908	-0.014450376980179	0.288	80.2694948420957	0.003	0.00695860224983442
1628	1628	hsa:6457	3	908	-0.0131255546424376	0.311	82.1841462311103	0.000999000999000999	0.00282003899344929
1629	1629	hsa:6464	2	369	-0.0162744327282667	0.335	63.057901999819	0.000999000999000999	0.00301278435701121
1630	1630	hsa:6470	4	461	-0.098634864969777	0.014	37.4714498405122	0.147	0.0147888304803516
1631	1631	hsa:6476	4	1165	-0.0300935353847813	0.131	72.1507570016288	0.291	0.16266192455456
1632	1632	hsa:6477	4	1624	-0.00176121844738544	0.485	181.376394104606	0.157	0.272227197287508
1633	1633	hsa:6480	3	41	-0.159971247258532	0.12	3.95733205705366	0.097	0.0634765032189418
1634	1634	hsa:6482	5	1558	-0.0357679765651814	0.035	241.28790310266	0.337	0.0641657384824149
1635	1635	hsa:6483	5	1558	-0.0353947623642844	0.037	134.5955930176	0.791	0.132617401327926
1636	1636	hsa:6484	1	3	NA	1	0.823700909419962	0.002	0.0144292161968444
1637	1637	hsa:6494	3	626	-0.0233943804857195	0.256	87.5803158368021	0.04	0.0571540854719568
1638	1638	hsa:6500	3	611	-0.107536091430923	0.000999000999000999	48.2687772882544	0.131	0.00130101095734026
1639	1639	hsa:6502	3	514	-0.0999706648232939	0.011	82.3363100624378	0.001	0.000136593768136825
1640	1640	hsa:6504	4	1265	0.0117971536518952	0.672	211.888362761289	0.000999000999000999	0.00557622492941486
1641	1641	hsa:6513	2	147	0.0827735893857183	0.875	15.3157173276174	0.000999000999000999	0.00702997043001726
1642	1642	hsa:6514	2	178	-0.0446427582848178	0.249	12.037682534386	0.154	0.163396334595709
1643	1643	hsa:6518	3	604	-0.0227626960827833	0.26	85.8267938139082	0.018	0.0297856595511661
1644	1644	hsa:6531	3	1005	-0.00841936196300334	0.361	128.883789504343	0.018	0.0392236229495955
1645	1645	hsa:6541	2	1	NA	1	0.150561883539951	0.104	0.33938989550344
1646	1646	hsa:6548	2	217	0.0156434721702864	0.61	28.8724366007601	0.024	0.0764793273593729
1647	1647	hsa:6554	6	1681	0.0210525533565657	0.832	125.590278170528	0.233	0.511903842622454
1648	1648	hsa:6558	5	2340	-0.0251864229541803	0.076	292.447456678129	0.347	0.122246151687844
1649	1649	hsa:6579	6	1681	0.020640860764932	0.828	207.523649584879	0.162	0.403601953703744
1650	1650	hsa:6591	3	1118	0.0308313230794535	0.884	223.562346591937	0.000999000999000999	0.00709324160655663
1651	1651	hsa:6608	2	5	-0.516397779494322	0.182	1.28380491584472	0.009	0.012144589482837
1652	1652	hsa:6609	1	11	NA	1	2.77161144919012	0.008	0.0466265098984184
1653	1653	hsa:6610	1	11	NA	1	1.74063221088589	0.043	0.178301872021409
1654	1654	hsa:6611	3	61	-0.300338968964591	0.003	5.88314405936114	0.116	0.00311923121121005
1655	1655	hsa:6613	3	11	-0.524404424085076	0.027	1.10465399058909	0.476	0.068812896026487
1656	1656	hsa:6616	3	21	-0.270494074973216	0.069	1.86152483372545	0.409	0.128904748371387
1657	1657	hsa:6647	2	68	-0.101369752631689	0.158	4.99519486358701	0.738	0.367182696146076
1658	1658	hsa:6648	4	1587	-0.00786185011391213	0.365	273.848044718804	0.008	0.0199616212550897
1659	1659	hsa:6652	4	1201	-0.0155018064912967	0.259	103.247514365216	0.448	0.365952079063014
1660	1660	hsa:6654	3	1233	-0.0143508765853029	0.235	103.975093458737	0.763	0.487470588682706
1661	1661	hsa:6655	3	1233	-0.0147981533995557	0.237	109.593460857615	0.533	0.387670179282221
1662	1662	hsa:6657	2	64	-0.169532692122287	0.051	4.87999247805628	0.601	0.137472493305091
1663	1663	hsa:6659	5	778	-0.0827910337545175	0.026	90.3033987308841	0.051	0.0101115302014517
1664	1664	hsa:6667	2	61	0.153899966346597	0.92	6.05606463781558	0.042	0.164353975298805
1665	1665	hsa:6675	3	16	-0.0106843460792672	0.503	1.96835198737671	0.138	0.254587416501727
1666	1666	hsa:6677	5	81	-0.0989396035556008	0.165	6.65338544023165	0.173	0.130058826759659
1667	1667	hsa:6688	4	1781	0.0221373531601557	0.797	324.40424791874	0.000999000999000999	0.00647763969776943
1668	1668	hsa:6696	3	816	-0.0587155338454534	0.081	118.510928026875	0.000999000999000999	0.000843343589604015
1669	1669	hsa:6709	4	486	0.0339202731965311	0.801	46.6712444009592	0.000999000999000999	0.00650614379430013
1670	1670	hsa:6713	3	8	0.320844473959874	0.876	1.52006747126957	0.001	0.00704316655311643
1671	1671	hsa:6714	2	724	-0.0396948498684928	0.12	82.8208773527282	0.177	0.103053699314602
1672	1672	hsa:6715	2	55	-0.0306681402245448	0.46	4.05926075694507	0.942	0.795696326974815
1673	1673	hsa:6718	1	13	NA	1	0.994109695955117	0.067	0.248105198192608
1674	1674	hsa:6720	4	1955	-0.0181355204429632	0.159	295.527701113021	0.022	0.0232811625305453
1675	1675	hsa:6722	4	1619	-0.0123916380590995	0.293	138.748828584517	0.053	0.0802079998836503
1676	1676	hsa:6723	3	89	-0.212346253313671	0.006	9.68308297891593	0.437	0.0182066905171257
1677	1677	hsa:6732	3	12	-0.145643816250884	0.309	2.25653221427925	0.000999000999000999	0.00280389525819429
1678	1678	hsa:6750	5	1737	0.0177329475967946	0.781	123.380739723781	0.096	0.269207867156057
1679	1679	hsa:6752	2	104	-0.0560226402542802	0.257	13.4415953590173	0.001	0.00238147365957875
1680	1680	hsa:6770	4	1820	-0.00367372485288726	0.437	248.561781032259	0.002	0.00702908397933784
1681	1681	hsa:6772	1	57	NA	1	10.591048038639	0.015	0.0779955761681989
1682	1682	hsa:6773	3	1139	-0.0024157935239558	0.423	184.52931790675	0.000999000999000999	0.00370563968323997
1683	1683	hsa:6774	2	561	0.0399657107445168	0.872	83.0442168695141	0.000999000999000999	0.00700885953365302
1684	1684	hsa:6775	3	1055	0.00791648633233114	0.586	202.742322527373	0.000999000999000999	0.00494276673073939
1685	1685	hsa:6776	3	1435	0.0162086526038142	0.784	191.806054740521	0.012	0.0533075615046658
1686	1686	hsa:6777	1	40	NA	1	6.17943087729617	0.305	0.667170268224291
1687	1687	hsa:6778	3	1060	0.00910057411838367	0.614	115.831651264591	0.006	0.0243282376956102
1688	1688	hsa:6783	4	1289	0.0278708099419284	0.887	136.817918061714	0.004	0.0235635850691695
1689	1689	hsa:6788	2	160	-0.0639600135722809	0.169	16.0975081440594	0.058	0.0551379048961139
1690	1690	hsa:6789	2	100	-0.0974847691946271	0.113	11.3967966699846	0.777	0.301392946426429
1691	1691	hsa:6790	3	30	-0.356906294902252	0.016	8.50196461293095	0.000999000999000999	0.000192510231145776
1692	1692	hsa:6794	4	1754	0.00713218642632032	0.63	222.541396140621	0.387	0.587915155565281
1693	1693	hsa:6804	2	21	-0.320652881111661	0.061	2.6269787519229	0.08	0.0308543370884913
1694	1694	hsa:6809	2	15	-0.451530807970771	0.031	1.47455334924441	0.53	0.0839350594801085
1695	1695	hsa:6812	2	9	0.157134840263677	0.709	1.41397413130033	0.003	0.0152145219138591
1696	1696	hsa:6820	4	1402	0.0198492492492872	0.806	182.023250158357	0.051	0.172299958217436
1697	1697	hsa:6821	3	186	-0.0436342054981143	0.267	16.2648240261062	0.572	0.439711167029528
1698	1698	hsa:6822	2	57	-0.0763725325460703	0.29	5.96754818568455	0.249	0.26199064228846
1699	1699	hsa:6833	2	169	0.0150398903959231	0.568	20.1763613021446	0.003	0.0125666197533798
1700	1700	hsa:6839	5	550	-0.0442458712698958	0.097	64.3146123653968	0.122	0.0643388371799668
1701	1701	hsa:6843	3	21	-0.28614040718256	0.062	1.83907494231291	0.831	0.2043231848906
1702	1702	hsa:6844	1	7	NA	1	1.00080026694417	0.148	0.430760364772267
1703	1703	hsa:6850	2	344	0.059586390013986	0.831	31.6949625599493	0.002	0.0122983572141962
1704	1704	hsa:6865	3	319	-0.00388067911557326	0.488	46.3590724255723	0.003	0.0110189173120806
1705	1705	hsa:6869	3	319	-0.00878258957735002	0.435	41.9682035279613	0.002	0.00700090509129462
1706	1706	hsa:6870	3	319	-0.00231479105139458	0.497	31.5114426861822	0.014	0.0415243921612721
1707	1707	hsa:6880	11	240	-0.108072340267866	0.034	20.1663706904353	0.353	0.0650830290809306
1708	1708	hsa:6885	1	32	NA	1	4.86835962243236	0.000999000999000999	0.00790085392538984
1709	1709	hsa:6888	4	1135	-0.0223513665267896	0.18	113.946433015112	0.044	0.046239843459394
1710	1710	hsa:6890	6	557	-0.0354940659599625	0.256	109.630078018958	0.000999000999000999	0.00237109005907828
1711	1711	hsa:6891	6	557	-0.0339024038092915	0.268	105.514313608497	0.000999000999000999	0.00246997021463215
1712	1712	hsa:6892	2	5	-0.774596669241483	0.173	2.56330026694417	0.000999000999000999	0.00167006672750982
1713	1713	hsa:6898	3	381	-0.0291178592564683	0.256	22.8766903164872	0.576	0.429720028366428
1714	1714	hsa:6900	6	884	-0.0098251573000222	0.378	120.989600771423	0.028	0.0587243910433618
1715	1715	hsa:6907	3	557	-0.0458168792653533	0.111	49.7301318885169	0.67	0.267635515654131
1716	1716	hsa:6908	2	82	0.0446825471320765	0.671	8.66147294362501	0.094	0.237375633290789
1717	1717	hsa:6915	3	478	0.0079102380799834	0.607	74.6811381605737	0.001	0.0051030379325112
1718	1718	hsa:6916	4	1533	-0.0195894253888984	0.204	296.377209924441	0.000999000999000999	0.00193573583731113
1719	1719	hsa:6921	2	67	0.02238284043118	0.575	8.10659739503212	0.435	0.59674684583032
1720	1720	hsa:6928	4	187	-0.0475335767815089	0.242	24.1654580185051	0.002	0.00417857801520386
1721	1721	hsa:6932	2	245	0.143688667985704	0.998	28.2087961496697	0.12	0.373922520935163
1722	1722	hsa:6934	3	1134	-0.0173933232405991	0.239	124.551798903945	0.51	0.378424116207521
1723	1723	hsa:6935	7	1648	-0.00551833817114835	0.385	309.432709709529	0.001	0.00341197288111545
1724	1724	hsa:6999	5	1756	-0.0221354299306428	0.115	316.627047326034	0.108	0.0669245142547619
1725	1725	hsa:7003	4	1703	-0.0139157987351573	0.254	151.935537507918	0.442	0.357783117990797
1726	1726	hsa:7004	1	10	NA	1	0.950987891367297	0.247	0.592396634761477
1727	1727	hsa:7006	1	7	NA	1	1.02944020903086	0.106	0.343897515596227
1728	1728	hsa:7018	5	2335	0.0186584002163107	0.838	348.813940763279	0.346	0.648919189111609
1729	1729	hsa:7023	4	1611	-0.0194336983537731	0.166	249.570089810877	0.08	0.0706694686719215
1730	1730	hsa:7029	4	1546	-0.0527509129861526	0.007	198.154315078952	0.015	0.00106696277181971
1731	1731	hsa:7035	3	22	-0.0348931578899427	0.382	5.66963821147407	0.001	0.00338837436065465
1732	1732	hsa:7038	2	70	0.0481829960069919	0.691	9.38967980838838	0.083	0.22129827833942
1733	1733	hsa:7039	1	10	NA	1	1.36923199823545	0.345	0.712152747373018
1734	1734	hsa:7040	3	1169	-0.0206558463045327	0.169	226.715987240974	0.000999000999000999	0.00163540191511514
1735	1735	hsa:7042	3	1161	-0.0140575751303072	0.248	132.677547563569	0.19	0.191074320691781
1736	1736	hsa:7044	4	1173	-0.0177466815746574	0.208	118.655712011356	0.113	0.111657741838078
1737	1737	hsa:7046	4	1634	-0.00473165280227249	0.376	256.431218752828	0.003	0.00878408469402228
1738	1738	hsa:7048	3	1024	0.0161900154425244	0.717	195.7486829529	0.001	0.00590839169235046
1739	1739	hsa:7054	3	914	0.0107074943508782	0.644	99.0281726484028	0.033	0.103099918354401
1740	1740	hsa:7056	3	60	-0.000833619939456418	0.528	13.8842567980273	0.001	0.00451250673680823
1741	1741	hsa:7057	3	1135	-0.0419580495203837	0.107	204.626447832775	0.000999000999000999	0.00108428960134905
1742	1742	hsa:7059	3	831	-0.0710588725602224	0.044	88.7650255067415	0.392	0.0872758990852398
1743	1743	hsa:7060	3	831	-0.0714780989470084	0.042	79.4816412259071	0.054	0.0160775274335885
1744	1744	hsa:7067	1	30	NA	1	4.47019783277531	0.002	0.0144292161968444
1745	1745	hsa:7068	2	451	0.0213021944545165	0.705	31.2488830196362	0.006	0.0273492903994583
1746	1746	hsa:7070	3	428	-0.0659354706464989	0.063	47.674980629581	0.000999000999000999	0.000671750895015053
1747	1747	hsa:7074	1	24	NA	1	1.66988422993394	0.169	0.469457759325982
1748	1748	hsa:7076	4	1788	0.0228690570480003	0.886	241.956485838386	0.167	0.430687759259273
1749	1749	hsa:7078	2	95	-0.106678643565031	0.095	20.1423598543118	0.000999000999000999	0.000973976174661538
1750	1750	hsa:7082	2	347	0.0995374573930412	0.988	32.0755686702561	0.021	0.101152836905884
1751	1751	hsa:7083	3	242	-0.152785727633009	0.003	37.2313160290924	0.156	0.00405617577863782
1752	1752	hsa:7084	3	242	-0.158098363924501	0.003	37.4110820004977	0.197	0.00498431347346989
1753	1753	hsa:7086	2	46	-0.187276436766925	0.066	4.14123014885531	0.963	0.238711289202312
1754	1754	hsa:7094	3	668	-0.0592339627381661	0.099	95.5074632668989	0.000999000999000999	0.00101090672388423
1755	1755	hsa:7096	4	1255	0.023580087329496	0.763	265.910908090897	0.000999000999000999	0.006234534761849
1756	1756	hsa:7097	3	1134	0.0148813074812474	0.684	245.557750712605	0.000999000999000999	0.00566370595826331
1757	1757	hsa:7099	2	438	0.0215119663731115	0.702	93.7124913752149	0.000999000999000999	0.00579453427702161
1758	1758	hsa:7100	2	108	0.0600400400444964	0.743	15.8324147701565	0.03	0.107072625863015
1759	1759	hsa:7108	3	28	-0.224345946676608	0.107	3.02058000972763	0.738	0.279439976924687
1760	1760	hsa:7124	2	356	-0.00555118219254479	0.455	53.050347536422	0.000999000999000999	0.00395282392697564
1761	1761	hsa:7128	3	772	-6.405892315936e-05	0.489	153.629387329201	0.000999000999000999	0.00421299516598821
1762	1762	hsa:7132	2	210	-0.028582798951883	0.303	30.7584734978735	0.000999000999000999	0.00275538612147329
1763	1763	hsa:7133	2	74	-0.096340990912221	0.172	18.624160850828	0.000999000999000999	0.00166140927074449
1764	1764	hsa:7134	1	1	NA	1	0.294479147814677	0.002	0.0144292161968444
1765	1765	hsa:7139	3	262	-0.0833120048171147	0.042	31.0745386446928	0.773	0.143745224356241
1766	1766	hsa:7143	3	778	-0.0846795657900409	0.025	82.2105401943263	0.000999000999000999	0.000289651204631098
1767	1767	hsa:7156	1	3	NA	1	0.666115481630622	0.000999000999000999	0.00790085392538984
1768	1768	hsa:7157	1	49	NA	1	3.74379368948511	0.142	0.419173807436085
1769	1769	hsa:7159	4	1256	-0.0391117434680703	0.057	149.823831695095	0.713	0.170813223603105
1770	1770	hsa:7161	5	2195	0.00935048713622229	0.672	322.53418171998	0.101	0.250456618783114
1771	1771	hsa:7166	5	1866	-0.00947860527409927	0.322	176.369280070808	0.055	0.0891455133994888
1772	1772	hsa:7168	3	320	-0.0634231174411367	0.085	54.7132492251832	0.007	0.0050140347456891
1773	1773	hsa:7169	4	1045	-0.0152281144828672	0.302	162.05384410913	0.000999000999000999	0.00274728978857002
1774	1774	hsa:7170	2	106	-0.168813884028466	0.014	12.2638512634603	0.728	0.0569340630201125
1775	1775	hsa:7172	3	225	-0.0945276768794087	0.042	24.2845896298977	0.169	0.0422184939113311
1776	1776	hsa:7175	1	3	NA	1	0.98465212424215	0.000999000999000999	0.00790085392538984
1777	1777	hsa:7185	2	303	-0.0129702134013404	0.395	63.8878466880825	0.000999000999000999	0.00348737422166985
1778	1778	hsa:7186	2	461	0.00224667513491542	0.538	68.2132881074111	0.000999000999000999	0.00458383067532162
1779	1779	hsa:7187	1	24	NA	1	2.83378483847616	0.005	0.0314915868327402
1780	1780	hsa:7188	15	2694	0.0628624624023496	0.996	310.706535324857	0.49	0.838139354042573
1781	1781	hsa:7189	1	56	NA	1	4.03931912270383	0.085	0.294533841911805
1782	1782	hsa:7201	3	319	-0.0109612164492508	0.411	32.8371230544747	0.000999000999000999	0.00361233149131095
1783	1783	hsa:7205	2	26	-0.12203404316955	0.307	2.48411272169939	0.584	0.487441370537578
1784	1784	hsa:7220	3	252	-0.0264564796745925	0.295	40.3225832221066	0.033	0.0548277890769379
1785	1785	hsa:7248	3	733	0.00171742037808496	0.499	105.290968436114	0.467	0.572463089640469
1786	1786	hsa:7249	3	1230	0.00203037776768822	0.536	123.023584545516	0.064	0.149994010627463
1787	1787	hsa:7252	3	105	-0.0478101393918337	0.285	11.1272643595602	0.000999000999000999	0.00260913681342476
1788	1788	hsa:7253	2	105	-0.0340404773751863	0.33	6.85119559315899	0.691	0.565121750522218
1789	1789	hsa:7263	3	375	0.0156948177385164	0.642	47.4111449190118	0.02	0.0687606393524489
1790	1790	hsa:7264	2	2	-1	0.5	0.397548864356167	0.119	0.227395848502618
1791	1791	hsa:7270	2	195	0.142307317175215	0.994	24.0172410867795	0.069	0.252373630348482
1792	1792	hsa:7272	5	428	-0.143133770075093	0.000999000999000999	70.3147240634332	0.001	1.48017083499474e-05
1793	1793	hsa:7291	3	406	-0.00962568339293638	0.404	69.0349692618315	0.000999000999000999	0.00355774071214368
1794	1794	hsa:7294	3	896	0.000948270542915849	0.536	68.3424463849425	0.192	0.336921644030978
1795	1795	hsa:7296	3	54	-0.147239069078896	0.091	3.99978155257443	0.827	0.269935296245381
1796	1796	hsa:7297	2	300	-0.0676562266935972	0.111	34.5426806680391	0.000999000999000999	0.00112075401011522
1797	1797	hsa:7298	3	253	-0.152606707229186	0.002	33.5785668434983	0.065	0.00129323689397613
1798	1798	hsa:7305	2	73	-0.0275056054486171	0.421	26.3074149115465	0.000999000999000999	0.00369011219936354
1799	1799	hsa:7306	4	1241	0.0403534883617132	0.944	106.430857501584	0.047	0.182584825903543
1800	1800	hsa:7307	16	2694	0.0422497406217213	0.979	185.320868162383	0.519	0.85212350097034
1801	1801	hsa:7321	4	881	-0.0850400083653982	0.003	101.843699806579	0.486	0.0109797455029869
1802	1802	hsa:7322	2	51	-0.175534398138861	0.092	4.43207769658854	0.406	0.160141800213702
1803	1803	hsa:7323	4	881	-0.087282524868759	0.003	87.5316755836576	0.062	0.0017836960824707
1804	1804	hsa:7324	4	881	-0.0886964810576251	0.003	64.9864350511266	0.517	0.0115841947173158
1805	1805	hsa:7326	3	10	0.0276818266179133	0.574	1.46283919441679	0.006	0.0229753431086829
1806	1806	hsa:7329	2	11	-0.495433694306862	0.051	0.501411778345851	0.984	0.200337490270571
1807	1807	hsa:7341	3	11	-0.524404424085076	0.022	0.962459562483033	0.722	0.0816825640673874
1808	1808	hsa:7353	4	7	-0.414039335605413	0.198	0.791138810967333	0.479	0.318246402553671
1809	1809	hsa:7358	5	2184	0.0131239192339178	0.759	214.295609560221	0.431	0.692663170471091
1810	1810	hsa:7360	5	2145	0.00826913751601672	0.667	275.622214618586	0.082	0.213634833176118
1811	1811	hsa:7368	4	548	-0.0483328308402578	0.078	62.3400639647996	0.966	0.27017064426784
1812	1812	hsa:7371	3	221	-0.140143523363667	0.01	35.259029160257	0.006	0.000643269959744532
1813	1813	hsa:7372	3	323	-0.0982596192133806	0.016	39.7370232331916	0.289	0.0294849135625581
1814	1814	hsa:7389	9	723	-0.0570602907599095	0.04	61.0878568681567	0.486	0.096041813010225
1815	1815	hsa:7390	8	723	-0.0573839681083866	0.04	62.4720125723916	0.66	0.122347929497109
1816	1816	hsa:7398	5	92	-0.197796058634292	0.015	15.0266922959461	0.001	0.000181611905352931
1817	1817	hsa:7408	1	21	NA	1	3.18027426816578	0.072	0.261438419517558
1818	1818	hsa:7409	2	362	-0.0210950877065581	0.327	79.9594691656863	0.000999000999000999	0.00294873308009974
1819	1819	hsa:7410	2	409	-0.0224572493678713	0.33	41.8193397373541	0.017	0.0346877775785007
1820	1820	hsa:7412	2	318	0.000733208155537796	0.515	82.443460292055	0.000999000999000999	0.00441034637980151
1821	1821	hsa:7414	3	643	0.00302625810316544	0.525	68.9541734062528	0.000999000999000999	0.00448589779495056
1822	1822	hsa:7416	2	19	NA	1	2.94582998710524	0.002	0.0144292161968444
1823	1823	hsa:7419	3	560	-0.0261018356652101	0.227	42.5509788424124	0.845	0.508544514896206
1824	1824	hsa:7421	4	1493	0.0254208475793586	0.848	264.607533396299	0.001	0.00684559017400218
1825	1825	hsa:7422	2	413	-0.00679588919006478	0.397	40.916179814044	0.004	0.0118231045068576
1826	1826	hsa:7423	2	316	-0.0309728919211611	0.243	38.2771942301602	0.069	0.0853162405423138
1827	1827	hsa:7424	3	1326	-0.0136600765962192	0.288	177.419882816035	0.015	0.0278402394674568
1828	1828	hsa:7430	1	9	NA	1	0.960798230929327	0.417	0.781736996845451
1829	1829	hsa:7431	4	420	0.00306252448683543	0.54	76.3719997059089	0.002	0.00845725777687369
1830	1830	hsa:7450	3	772	-0.0807726678909205	0.028	92.6951258653063	0.000999000999000999	0.000321239316031389
1831	1831	hsa:7454	4	1722	0.0370391778734678	0.952	297.870257075152	0.004	0.0250210396250979
1832	1832	hsa:7465	4	754	-0.114867295748408	0.000999000999000999	81.1021860295448	0.148	0.00145180426784308
1833	1833	hsa:7472	4	1384	0.0134531624538282	0.717	137.303349951362	0.128	0.310974207119372
1834	1834	hsa:7474	2	52	-0.132938494520102	0.122	6.65872078884264	0.023	0.019294042804229
1835	1835	hsa:7475	1	13	NA	1	1.76409728192019	0.05	0.1997866136777
1836	1836	hsa:7476	2	52	-0.123181540793856	0.137	4.90280998325943	0.502	0.252877150288853
1837	1837	hsa:7479	3	434	0.0186284885522069	0.653	58.1737901264591	0.000999000999000999	0.00543727392872194
1838	1838	hsa:7480	3	434	0.0197713406106245	0.663	71.5607121244684	0.000999000999000999	0.00551047387628165
1839	1839	hsa:7481	1	13	NA	1	1.9030552947697	0.015	0.0779955761681989
1840	1840	hsa:7482	2	52	-0.137816971383225	0.114	6.2398107354538	0.34	0.164744205228353
1841	1841	hsa:7498	4	1039	-0.0484162139110966	0.045	111.240512736404	0.212	0.0539225775101993
1842	1842	hsa:7514	4	37	0.0738278941628741	0.682	6.74810254728079	0.002	0.010362763193481
1843	1843	hsa:7525	2	45	-0.0906039451444667	0.259	2.70994635666455	0.961	0.5950448522195
1844	1844	hsa:7529	3	904	-0.0388896458993432	0.089	76.8808344550267	0.476	0.176295936133606
1845	1845	hsa:7533	4	1805	-0.010783220419454	0.303	255.443087022668	0.185	0.217573106139094
1846	1846	hsa:7534	3	904	-0.0398917857961052	0.083	91.7607173558954	0.194	0.0825841274603622
1847	1847	hsa:7535	2	302	-0.00614825055950582	0.472	61.3488902305221	0.000999000999000999	0.0040832154508691
1848	1848	hsa:7704	4	829	-0.0621490754219889	0.017	74.6951074846168	0.011	0.00179228316298752
1849	1849	hsa:7706	3	171	-0.0177777991440536	0.386	14.6933874762465	0.355	0.409384716328262
1850	1850	hsa:7709	1	3	NA	1	0.607610453805085	0.036	0.155672508258937
1851	1851	hsa:7786	3	219	0.00701796074572412	0.556	24.2177425968238	0.000999000999000999	0.00471891350730271
1852	1852	hsa:7791	3	416	-0.0222444392976557	0.287	62.2936548445842	0.000999000999000999	0.00262544154925907
1853	1853	hsa:7832	7	565	-0.078102766104574	0.013	54.6720185107682	0.000999000999000999	0.000159111177932933
1854	1854	hsa:7841	7	36	-0.170192119184499	0.08	4.70223424350737	0.005	0.00352961840434252
1855	1855	hsa:7849	3	1225	0.0017520619392877	0.544	136.19975355737	0.408	0.556055044229764
1856	1856	hsa:7850	2	153	0.0760017044130245	0.863	13.2561589448919	0.006	0.0324315558670462
1857	1857	hsa:7852	2	230	-0.0227970162400748	0.355	33.2746873868881	0.000999000999000999	0.00317208716826353
1858	1858	hsa:7855	4	1982	0.0335774701648883	0.951	211.141989412723	0.258	0.590095046285788
1859	1859	hsa:7867	3	916	-0.0256672607733791	0.176	84.2391490306307	0.012	0.0151221732565477
1860	1860	hsa:7869	6	134	0.0226868664855009	0.633	16.8720244491449	0.137	0.298758979749714
1861	1861	hsa:7874	3	731	0.0162968558853767	0.718	57.6148602219256	0.004	0.0196810883150306
1862	1862	hsa:7879	4	958	0.008004812729274	0.609	112.511799695729	0.000999000999000999	0.00511334395651126
1863	1863	hsa:7915	3	94	-0.061562352738508	0.228	11.4580298163062	0.004	0.00729588195791563
1864	1864	hsa:7923	8	2575	0.0317682480880426	0.973	291.575639365216	0.286	0.634233036295298
1865	1865	hsa:7941	3	577	-0.0316019272071425	0.178	73.5741420459687	0.002	0.00318284641845196
1866	1866	hsa:7976	4	1986	0.039530285697367	0.98	252.645432964211	0.044	0.178679291354686
1867	1867	hsa:7991	13	1987	-0.0347439495797043	0.043	230.234596275224	0.454	0.0963647549538456
1868	1868	hsa:8021	8	1019	-0.0341223781969481	0.1	108.13082879943	0.128	0.068586369383124
1869	1869	hsa:8027	3	443	-0.0218222372456357	0.325	45.3539081587639	0.438	0.419856551329489
1870	1870	hsa:8030	2	83	-0.139422847955002	0.075	7.23459274047597	0.691	0.20522091681572
1871	1871	hsa:8031	3	786	-0.00494632329792166	0.424	95.5362877228305	0.017	0.0427619195725374
1872	1872	hsa:8087	3	100	-0.0703941812662687	0.184	13.6207823387024	0.000999000999000999	0.00176492474658008
1873	1873	hsa:8091	3	227	-0.0839058644159964	0.062	31.555574014795	0.138	0.0492921640052915
1874	1874	hsa:8174	3	349	-0.0580574746259421	0.181	35.1268253438603	0.000999000999000999	0.00173912123665605
1875	1875	hsa:8189	10	118	-0.191046409045928	0.005	13.3179512883449	0.142	0.00585767436742953
1876	1876	hsa:8202	1	5	NA	1	0.621349312279432	0.293	0.652681722299766
1877	1877	hsa:8218	3	53	-0.257503512937325	0.004	5.34154573115555	0.043	0.00166289876595794
1878	1878	hsa:8228	3	154	-0.131371167927717	0.02	17.3939985634784	0.396	0.046239843459394
1879	1879	hsa:8243	4	77	-0.0369943018247203	0.343	11.7131983248122	0.000999000999000999	0.00307664476185622
1880	1880	hsa:8277	2	46	-0.187276436766925	0.067	5.12500777644557	0.398	0.123313341977081
1881	1881	hsa:8309	3	333	-6.20503483021227e-05	0.462	31.2209797190299	0.931	0.793010077269883
1882	1882	hsa:8312	3	958	-0.0295145667796535	0.145	100.928492048231	0.032	0.0295709098351321
1883	1883	hsa:8317	6	169	-0.299478137164457	0.000999000999000999	36.7681558795584	0.000999000999000999	1.47879189328458e-05
1884	1884	hsa:8318	6	169	-0.297354178744851	0.001	36.7356955818478	0.000999000999000999	1.48017083499474e-05
1885	1885	hsa:8322	1	22	NA	1	1.89951771898471	0.176	0.481759745974142
1886	1886	hsa:8323	10	2633	0.0364991720422728	0.972	250.142072125826	0.49	0.829560386323473
1887	1887	hsa:8324	1	22	NA	1	3.19465432992489	0.075	0.269270037408437
1888	1888	hsa:8332	2	33	0.396790222106275	0.998	4.49771513890146	0.000999000999000999	0.00788704822020172
1889	1889	hsa:8334	3	187	-0.103345939480934	0.084	17.01128857117	0.000999000999000999	0.000871526707087053
1890	1890	hsa:8344	3	187	-0.0931363607822127	0.089	23.9538001368654	0.000999000999000999	0.000918262495786519
1891	1891	hsa:8345	3	187	-0.0914694907905848	0.095	25.4305040267849	0.000999000999000999	0.000973976174661538
1892	1892	hsa:8346	3	187	-0.0920945670374452	0.092	23.6803626368654	0.000999000999000999	0.000946168208066779
1893	1893	hsa:8349	3	187	-0.116680899413958	0.058	18.9181423061261	0.000999000999000999	0.000623228660109445
1894	1894	hsa:8379	4	428	-0.149519406320099	0.000999000999000999	38.0743343362592	0.555	0.00471142435487089
1895	1895	hsa:8382	3	607	-0.0531767151676818	0.04	72.305254473577	0.997	0.168368587715473
1896	1896	hsa:8394	3	1270	0.0260302475540448	0.84	151.287302902452	0.073	0.232503930475683
1897	1897	hsa:8396	2	266	0.0284870270181821	0.734	36.0287530540223	0.28	0.530696195068618
1898	1898	hsa:8399	2	347	-0.092378922383033	0.012	30.6302236505746	0.136	0.0121060928046224
1899	1899	hsa:8408	1	1	NA	1	0.223154295991313	0.073	0.264062596161864
1900	1900	hsa:8411	6	2139	0.0406618310950006	0.986	306.303924701384	0.043	0.176403412008951
1901	1901	hsa:8424	2	26	-0.342961189673668	0.018	2.73351747013845	0.45	0.0471087188601603
1902	1902	hsa:8431	5	1681	0.0209190489707858	0.833	217.425102931861	0.028	0.110981945588733
1903	1903	hsa:8434	4	907	0.0174681029800799	0.743	179.746265185277	0.001	0.00609617718334216
1904	1904	hsa:8443	7	2060	-0.0188045058319645	0.141	186.162741918152	0.518	0.264162043515006
1905	1905	hsa:8453	2	67	0.02238284043118	0.579	6.34816914193286	0.52	0.662490190255063
1906	1906	hsa:8454	3	611	-0.10789860658136	0.000999000999000999	44.980042105918	0.614	0.0051503099799323
1907	1907	hsa:8458	3	1097	-0.0072980855984447	0.399	123.134083595376	1	0.765598750974817
1908	1908	hsa:8480	5	47	-0.0624758524259543	0.303	8.19333516197629	0.001	0.00275783865899384
1909	1909	hsa:8491	4	1479	0.00942856613198994	0.648	207.384739644602	0.000999000999000999	0.00540061672981061
1910	1910	hsa:8493	3	472	-0.00876082740647337	0.405	54.0565997986607	0.284	0.363767917045155
1911	1911	hsa:8503	1	141	NA	1	17.0355949122251	0.06	0.228804643005602
1912	1912	hsa:8513	4	1153	-0.0111455922732581	0.316	101.235663062166	0.061	0.0953948900004132
1913	1913	hsa:8516	3	1049	-0.0695451069582758	0.016	163.062957396389	0.029	0.00402549046666244
1914	1914	hsa:8527	2	201	-0.0486992453103965	0.218	22.8121627850421	0.099	0.104368299811266
1915	1915	hsa:8528	5	1803	-0.0264299783650076	0.097	209.021718905529	0.984	0.31967192963854
1916	1916	hsa:8553	5	1636	-0.00915793636930171	0.337	267.297955925934	0.001	0.00303145911050522
1917	1917	hsa:8554	2	92	-0.0196428092367406	0.421	7.94471017894308	0.4	0.468389979036086
1918	1918	hsa:8555	4	412	-0.149313187650268	0.006	40.3815032293458	0.137	0.00666129907391046
1919	1919	hsa:8556	5	1514	-0.0551318443865331	0.013	191.807231104651	0.069	0.00719075986222721
1920	1920	hsa:8560	5	1647	0.004502896458124	0.56	175.223734701611	0.068	0.162527955909766
1921	1921	hsa:8564	5	1089	0.0252352089895856	0.837	204.416805464438	0.138	0.364817939264496
1922	1922	hsa:8566	6	2103	0.0274273016958296	0.925	274.067378659171	0.175	0.456638180781774
1923	1923	hsa:8569	3	1083	0.00673651738844605	0.589	150.008310899466	0.006	0.0234845782145691
1924	1924	hsa:8573	6	1419	-0.00724646568135474	0.364	158.15307155461	0.108	0.166534495409449
1925	1925	hsa:8600	4	1752	0.0127145292729731	0.675	136.481364808615	0.071	0.193526804673167
1926	1926	hsa:8605	2	552	-0.0674941139006194	0.026	95.7830315129852	0.016	0.00365448732384445
1927	1927	hsa:8607	2	75	-0.0750872508359125	0.25	8.77277932992489	0.251	0.236479442985883
1928	1928	hsa:8611	4	1537	0.00493639346400165	0.581	259.889354611574	0.011	0.0386838572004547
1929	1929	hsa:8612	3	441	-0.0159350331548403	0.339	55.3525154680572	0.23	0.276905086115279
1930	1930	hsa:8613	3	441	-0.0250077745991075	0.259	37.2338942742738	0.432	0.356951464924612
1931	1931	hsa:8625	4	746	-0.0151898995901075	0.313	64.6167725205864	0.928	0.649557565939469
1932	1932	hsa:8626	10	2616	0.0451272303872688	0.986	175.49366219686	0.307	0.664432844175835
1933	1933	hsa:8630	4	1367	0.0297779824052778	0.902	232.301504105963	0.007	0.0382943209021758
1934	1934	hsa:8631	2	58	0.0139445920111444	0.576	5.92290785336169	0.399	0.567766742786513
1935	1935	hsa:8639	5	1801	0.0330515410952568	0.945	301.218019721066	0.06	0.219427926569686
1936	1936	hsa:8643	4	1079	0.0130280164345862	0.727	124.697351342639	0.001	0.00598072662647316
1937	1937	hsa:8644	2	178	0.111748340594978	0.977	14.1698170697222	0.274	0.620496069743498
1938	1938	hsa:8646	2	13	0.377425678048199	0.948	2.06571379286942	0.01	0.0536432527265402
1939	1939	hsa:8648	4	1763	-0.00286376348151316	0.406	158.629869468826	0.422	0.473587704911833
1940	1940	hsa:8649	4	1933	-0.0105670914371263	0.307	152.534663152656	0.701	0.545798292587767
1941	1941	hsa:8650	2	18	0.257247877713763	0.88	2.56062234186951	0.011	0.0545728718960745
1942	1942	hsa:8651	2	229	-0.0617504713455718	0.194	31.6594899500045	0.000999000999000999	0.00185058788057083
1943	1943	hsa:8654	3	533	-0.0526810305647041	0.06	77.5096922789793	0.004	0.00224036919230935
1944	1944	hsa:8659	3	193	-0.0368532684238954	0.26	23.7977862580309	0.711	0.496932610062318
1945	1945	hsa:8661	1	6	NA	1	0.823086570219889	0.132	0.399293843044241
1946	1946	hsa:8662	3	73	0.0704504917567163	0.759	7.64884894466564	0.000999000999000999	0.00620583594925516
1947	1947	hsa:8664	2	19	0.363667033426292	0.967	2.37077314835761	0.241	0.5724834812728
1948	1948	hsa:8665	1	6	NA	1	1.02549118858022	0.221	0.554619959619629
1949	1949	hsa:8666	2	19	0.346349555644087	0.956	2.37492859809067	0.174	0.464714791272845
1950	1950	hsa:8667	2	19	0.3983019889907	0.978	1.65503051194462	0.278	0.625980222539147
1951	1951	hsa:8668	4	587	-0.00318992607854646	0.465	59.2922112535065	0.418	0.512746450587665
1952	1952	hsa:8672	4	285	-0.0798818193677673	0.051	26.6916646400778	0.157	0.0466603050329723
1953	1953	hsa:8674	3	22	-0.203497957655376	0.134	2.26942344018641	0.465	0.235259714189664
1954	1954	hsa:8675	2	7	-0.534522483824849	0.167	0.827780008596507	0.106	0.0891132425857104
1955	1955	hsa:8677	5	230	0.0156616101646268	0.634	26.7553134331735	0.001	0.00530243465663615
1956	1956	hsa:8678	5	1085	0.0343611791726679	0.903	140.537761005791	0.019	0.0869061932284592
1957	1957	hsa:8683	5	927	-0.0815722475552846	0.005	104.555997477604	0.024	0.00120336225782187
1958	1958	hsa:8692	6	451	-0.0265536643074334	0.267	52.8115583431364	0.028	0.0440789250430708
1959	1959	hsa:8697	2	72	-0.1964301737607	0.034	10.8877802348204	0.000999000999000999	0.000383481602542618
1960	1960	hsa:8698	3	540	-0.0343330699259072	0.151	72.9193554316351	0.623	0.316431863968791
1961	1961	hsa:8702	4	71	-0.124913809311667	0.099	7.03506964867433	0.002	0.00188639421839941
1962	1962	hsa:8703	7	1959	-0.0271037417736261	0.096	214.002786088363	0.813	0.277104058742326
1963	1963	hsa:8704	2	41	-0.146099825140671	0.154	4.27054466224776	0.582	0.30581857915082
1964	1964	hsa:8706	4	192	-0.126456078252022	0.015	15.4111505746086	0.928	0.073420046447136
1965	1965	hsa:8707	6	1956	-0.0279313016666816	0.091	195.219157202968	0.177	0.082604770743097
1966	1966	hsa:8717	3	713	0.0238894082420025	0.784	112.84420668944	0.001	0.00639046360548927
1967	1967	hsa:8733	18	77	-0.18228583723158	0.014	9.58829022825988	0.097	0.0103231659752904
1968	1968	hsa:8735	3	620	-0.00740333756918527	0.413	80.6407494231291	0.019	0.0458863054168614
1969	1969	hsa:8737	3	746	0.022848955619655	0.78	96.2870858689259	0.000999000999000999	0.00635627231580291
1970	1970	hsa:8743	3	692	0.0137908380093498	0.652	99.9297617297077	0.000999000999000999	0.00542994555807563
1971	1971	hsa:8760	3	426	-0.00742341799543079	0.444	31.2485472185775	0.037	0.0839268420656812
1972	1972	hsa:8761	6	565	-0.0838354164389851	0.011	62.8904574529454	0.594	0.0394048288005585
1973	1973	hsa:8764	3	465	0.0180446486676979	0.711	84.111957486879	0.000999000999000999	0.00585977477908024
1974	1974	hsa:8766	2	13	-0.413449115297361	0.058	1.10022070966428	0.544	0.140599444619329
1975	1975	hsa:8767	2	363	0.00363313232701209	0.513	56.14525976156	0.000999000999000999	0.00439521293839554
1976	1976	hsa:8772	2	67	-0.0430464166133696	0.358	10.4331324653877	0.002	0.00590115055995861
1977	1977	hsa:8773	6	2303	-0.0119177831936814	0.244	307.21906600647	0.099	0.114094162288151
1978	1978	hsa:8777	3	276	0.018882698808385	0.654	42.9634535336169	0.001	0.00544939169705563
1979	1979	hsa:8787	3	789	0.0197098481286009	0.725	52.7367206587639	0.351	0.602737443152339
1980	1980	hsa:8789	4	1720	-0.0317270081239545	0.083	115.080054972401	0.771	0.239908578031642
1981	1981	hsa:8792	3	922	0.00329927432940109	0.509	169.319410432314	0.000999000999000999	0.00436492265659255
1982	1982	hsa:8793	2	17	-0.0626224291085149	0.399	2.99147065310832	0.032	0.0684468634262912
1983	1983	hsa:8794	6	2307	0.0371665762257938	0.962	315.911725324631	0.162	0.445542376077882
1984	1984	hsa:8795	2	75	0.117150103209059	0.88	12.4529779544838	0.012	0.0586152019274345
1985	1985	hsa:8802	4	139	-0.0661437866553789	0.154	15.8923817697493	0.003	0.00401013489809973
1986	1986	hsa:8807	3	776	0.0116235147196983	0.635	151.911971343091	0.000999000999000999	0.00530512688583613
1987	1987	hsa:8809	3	776	0.0132354042802111	0.649	120.401910036422	0.000999000999000999	0.00540795124345058
1988	1988	hsa:8813	5	25	-0.383061121702385	0.009	2.42765077821012	0.886	0.0465009314454032
1989	1989	hsa:8817	3	955	-0.0192081713429298	0.216	89.1348626538322	0.042	0.0517336472902744
1990	1990	hsa:8818	5	30	-0.247341300297567	0.048	3.75111980816216	0.002	0.000984111587183659
1991	1991	hsa:8821	3	953	0.00830816281812439	0.621	177.082939326758	0.000999000999000999	0.0052019941501718
1992	1992	hsa:8824	2	80	-0.0971468137657906	0.157	9.25410596326124	0.673	0.343136149750564
1993	1993	hsa:8826	2	379	0.0224052827744189	0.702	62.6896950784997	0.001	0.0057996271620648
1994	1994	hsa:8829	6	884	-0.0113643986267805	0.357	141.855673411908	0.000999000999000999	0.00318795446225457
1995	1995	hsa:8835	3	947	0.00692366133410797	0.594	150.799927608361	0.000999000999000999	0.00500219846046675
1996	1996	hsa:8836	5	393	-0.117815362272614	0.006	48.1585702085784	0.356	0.0152698802844406
1997	1997	hsa:8837	3	745	-0.00999806498353033	0.39	108.909271502579	0.000999000999000999	0.00344819350097676
1998	1998	hsa:8841	2	106	-0.227829016955202	0.027	7.80909957243688	0.292	0.0460655804103291
1999	1999	hsa:8844	4	1641	0.0292069276114945	0.906	210.39794546308	0.054	0.196551544034887
[truncated: 710 more rows]
