# Supplementary material for: GeneSurrounder: network-based identification of disease genes in expression data
Source: BMC Bioinformatics. 2019 May 6;20:229. doi: 10.1186/s12859-019-2829-y (PMC6503437; doi:10.1186/s12859-019-2829-y)
Supplement: Supplementary file 5 — Table of the full results of GeneSurrounder applied to GSE19915.GPL5186. (CSV 185 kb) [file 12859_2019_2829_MOESM5_ESM.csv]

	X1	gene.id	radius	size	observed.tau_b	p.Decay	observed.cor	p.Sphere	p.Fisher
1	1	hsa:2	4	539	-0.0579112377893159	0.056	64.178164556962	0.099	0.0343452963107721
2	2	hsa:53947	2	9	-0.17817416127495	0.331	1.02714216163583	0.922	0.667386328650882
3	3	hsa:51166	2	25	-0.235702260395516	0.124	3.34371957156767	0.908	0.358491195632235
4	4	hsa:60496	4	87	-0.0272915029169952	0.403	9.22195715676728	0.031	0.0672446567866148
5	5	hsa:18	5	1217	0.0222307004682284	0.819	211.631937682571	0.207	0.470404517256837
6	6	hsa:4363	6	1690	-0.0394807650771884	0.027	161.773076923077	0.563	0.0788383761641317
7	7	hsa:10152	2	72	-0.100742890938096	0.189	10.4508519961052	0.152	0.130709039457692
8	8	hsa:25	4	1407	-0.058471373197608	0.006	153.116260954236	0.31	0.0135541525517381
9	9	hsa:27	4	1165	-0.0396384841181987	0.068	143.32188412853	0.51	0.15126001496678
10	10	hsa:3983	2	67	-0.159620384881481	0.072	9.97984420642649	0.347	0.11716295916049
11	11	hsa:22885	2	67	-0.159620384881481	0.075	8.36061343719572	0.813	0.231539839144317
12	12	hsa:28	4	46	-0.0740162997328809	0.246	5.51287731256086	0.294	0.262290164496433
13	13	hsa:30	1	17	NA	1	3.20659688412853	0.003	0.0204274289709421
14	14	hsa:31	3	361	0.0390195063903134	0.836	40.9958373904576	0.079	0.245514217199295
15	15	hsa:27034	3	110	-0.219429986357977	0.007	14.2680136319377	0.531	0.0245130142869583
16	16	hsa:34	2	77	-0.120716906513604	0.11	11.4933787731256	0.001	0.00111265332113891
17	17	hsa:35	3	124	-0.199399184983893	0.006	19.1673807205453	0.026	0.0015234421099115
18	18	hsa:36	3	124	-0.177309463205262	0.008	16.0120253164557	0.945	0.0444897237112576
19	19	hsa:37	3	104	-0.171026475717748	0.023	18.0488558909445	0.007	0.00156719109706975
20	20	hsa:38	5	1250	0.0709985088306125	0.997	205.103992210321	0.241	0.582903076793527
21	21	hsa:39	4	529	0.0241501659252503	0.734	82.8021908471276	0.315	0.569800603778083
22	22	hsa:43	9	1787	-0.0248513449890979	0.106	236.129454722493	0.579	0.2326546557639
23	23	hsa:22985	5	21	-0.231776267325277	0.104	3.78795034079844	0.048	0.0314491938903917
24	24	hsa:47	4	735	0.0487560461546131	0.942	97.6906037000974	0.021	0.0973864466529349
25	25	hsa:48	2	12	0.0870388279778489	0.646	2.2398247322298	0.065	0.175111895702171
26	26	hsa:51	2	73	-0.106067779378005	0.132	13.7507546251217	0.008	0.00829305005094516
27	27	hsa:8309	12	1918	-0.00534547710503428	0.39	209.076777020448	0.46	0.487633836886725
28	28	hsa:8310	2	73	-0.101586042221188	0.139	11.8368549172347	0.000999000999000999	0.00137223079060756
29	29	hsa:52	17	1955	-6.65761139449767e-05	0.534	291.845666991237	0.447	0.580646281779766
30	30	hsa:53	6	1632	-0.017617246578568	0.194	207.055160662123	0.577	0.35706096659979
31	31	hsa:51205	6	1632	-0.017617246578568	0.193	297.895447906524	0.342	0.24541094376958
32	32	hsa:2181	2	44	-0.0616887090864499	0.274	6.06582278481013	0.279	0.273001713020078
33	33	hsa:2182	21	1963	-0.00888972219610946	0.338	369.718013631938	0.492	0.464628686874178
34	34	hsa:51703	12	1918	-0.00739067594987814	0.348	287.735954235638	0.506	0.481912603850794
35	35	hsa:59	1	2	NA	1	0.833641674780915	0.001	0.00790775527898214
36	36	hsa:87	2	142	0.0114909959536721	0.529	26.7007789678676	0.004	0.0151468099507106
37	37	hsa:90	4	1058	0.0157911598344531	0.749	169.349367088608	0.115	0.297324190688429
38	38	hsa:91	11	1916	-0.0050978554340491	0.414	199.996348588121	0.344	0.419985200818244
39	39	hsa:130399	21	1963	-0.0230708443166369	0.115	267.259250243427	0.522	0.228889037828355
40	40	hsa:93	6	1425	-0.0017803976760507	0.458	150.339629990263	0.217	0.328842833202493
41	41	hsa:95	5	1320	-0.0147017653731826	0.256	184.678261927945	0.467	0.373480908970492
42	42	hsa:97	2	29	-0.367255833569244	0.004	3.39846640701071	0.906	0.0239915210522643
43	43	hsa:100	2	41	-0.10333910999511	0.211	5.07120253164557	0.56	0.370516160112085
44	44	hsa:102	3	216	-0.146741817720937	0.011	29.9296007789679	0.702	0.0452793514861638
45	45	hsa:6868	5	1334	-0.0157333090216281	0.245	214.445837390458	0.389	0.319335890627264
46	46	hsa:107	19	1959	-0.00327851493597189	0.455	283.032400194742	0.51	0.571029200005094
47	47	hsa:109	11	1921	5.21193994760423e-05	0.511	264.528213242454	0.44	0.560383625592323
48	48	hsa:196883	2	324	0.026284461886547	0.715	56.3317185978578	0.012	0.0494063973158378
49	49	hsa:111	1	54	NA	1	5.95881207400195	0.142	0.419173807436085
50	50	hsa:112	11	1921	-0.00895357859033599	0.324	249.790555014606	0.429	0.413278213890413
51	51	hsa:113	4	1540	0.0251980407022147	0.894	215.970180136319	0.08	0.260173893153319
52	52	hsa:114	12	1933	-0.00296849325057183	0.454	209.683982473223	0.465	0.539465417719782
53	53	hsa:115	5	1737	0.00301482645933443	0.564	269.459566699124	0.215	0.377096564431333
54	54	hsa:116	3	91	0.0142759127653249	0.57	16.9052336903603	0.008	0.0291403729088786
55	55	hsa:130	2	88	-0.103844626660354	0.129	11.9604186952288	0.98	0.3878749644686
56	56	hsa:131	4	805	-0.0261873786988659	0.192	102.139995131451	0.155	0.134354200453953
57	57	hsa:51094	19	1959	-0.0181373180569417	0.168	264.264143135346	0.485	0.285782763587565
58	58	hsa:132	12	1922	-0.00797758409984107	0.328	219.917624148004	0.442	0.424951776298233
59	59	hsa:146	1	3	NA	1	0.838583252190847	0.029	0.131673324020874
60	60	hsa:155	2	66	-0.134760598158945	0.088	14.8274342745862	0.000999000999000999	0.000908938307148938
61	61	hsa:156	3	287	-0.0832850487842322	0.066	32.6474440116845	0.185	0.0660011548883948
62	62	hsa:157	13	1924	-0.0138643671104806	0.268	216.349634858812	0.415	0.355486375264311
63	63	hsa:158	3	296	0.0179569381868434	0.614	34.5951557935735	0.045	0.126790012259493
64	64	hsa:174	5	1446	-0.0152532281973226	0.261	205.155185004869	0.238	0.234726496470429
65	65	hsa:178	3	165	-0.0279804278546416	0.344	30.8204722492697	0.085	0.1325220439135
66	66	hsa:79814	3	97	-0.0895738180375542	0.16	13.4398003894839	0.71	0.360688153378162
67	67	hsa:10554	3	251	-0.0569682521666458	0.144	42.2815968841285	0.439	0.237767882989313
68	68	hsa:10555	3	251	-0.0637704315298273	0.119	31.5870009737098	0.276	0.14503865072441
69	69	hsa:56894	6	1756	-0.0227995307866084	0.12	290.298953261928	0.308	0.158851087430432
70	70	hsa:56895	4	956	0.0104558112360569	0.648	125.167356377799	0.06	0.165134063640279
71	71	hsa:375790	5	761	-0.0724475760171015	0.023	94.5648003894839	0.204	0.0298500176657117
72	72	hsa:181	20	1963	-0.0152207152468944	0.226	318.997297955209	0.497	0.357901195792176
73	73	hsa:185	22	1963	-0.0121747297084316	0.299	284.838729308666	0.489	0.427331546932878
74	74	hsa:186	3	221	-0.021268458553511	0.304	44.0518257059396	0.000999000999000999	0.00276347915733757
75	75	hsa:10768	2	15	-0.33123146848433	0.088	1.71168451801363	0.523	0.187713131068079
76	76	hsa:26289	2	107	0.00736988336475855	0.535	17.4951071080818	0.099	0.208582735590852
77	77	hsa:10327	4	410	0.0187877293653574	0.659	68.4070837390458	0.134	0.30262000151935
78	78	hsa:1646	3	150	-0.0341444115728303	0.312	21.5206913339825	0.511	0.452171118533162
79	79	hsa:8644	2	115	-0.123982913097668	0.056	12.9338851022395	0.546	0.137211019722022
80	80	hsa:1109	3	188	-0.0567209831053233	0.178	23.9573028237585	0.238	0.176295936133606
81	81	hsa:207	19	1963	-0.0245136686402123	0.095	275.328091528724	0.497	0.191364455475211
82	82	hsa:208	1	53	NA	1	10.3261441090555	0.008	0.0466265098984184
83	83	hsa:210	5	255	-0.0291083463244319	0.285	37.5912122687439	0.202	0.22191816937455
84	84	hsa:211	4	253	-0.0382625857910667	0.227	34.6214459591042	0.048	0.060138941434249
85	85	hsa:212	2	25	-0.198987335265236	0.138	3.10365141187926	0.538	0.267307972324037
86	86	hsa:5832	5	640	-0.0412836962806269	0.101	81.4145569620253	0.243	0.115531965775375
87	87	hsa:216	4	744	-0.0170750491175696	0.286	95.7564995131451	0.463	0.400139612411379
88	88	hsa:8854	20	1963	-0.00551702116957254	0.407	261.342599805258	0.473	0.50969250554755
89	89	hsa:219	1	17	NA	1	2.88296007789679	0.213	0.542396643127088
90	90	hsa:217	5	1514	0.0299623344399969	0.919	186.311222005842	0.12	0.353417921364911
91	91	hsa:224	3	291	0.0618258955003405	0.893	35.9157010710808	0.148	0.399625833558068
92	92	hsa:221	3	216	-0.00469471352879244	0.49	23.4117332035054	0.403	0.517799634412154
93	93	hsa:8659	3	153	-0.0312079251699162	0.319	22.3041869522882	0.09	0.13064513592302
94	94	hsa:7915	2	14	-0.377964473009227	0.081	1.51648003894839	0.392	0.141290035740296
95	95	hsa:4329	2	71	-0.193329583051516	0.027	10.8527020447907	0.017	0.00398708529968781
96	96	hsa:223	2	99	0.127670647069397	0.945	11.9722005842259	0.23	0.549079637988313
97	97	hsa:226	5	1682	-0.0256526485398203	0.113	239.194741966894	0.239	0.124547079671963
98	98	hsa:230	5	1462	-0.0146405094064024	0.232	146.762463485881	0.125	0.131673324020874
99	99	hsa:85365	3	7	-0.414039335605413	0.175	1.55747322297955	0.042	0.0434609539983168
100	100	hsa:29880	10	42	-0.177507037232911	0.049	4.48634371957157	0.929	0.186161840419253
101	101	hsa:29929	11	42	-0.158939271585125	0.08	9.08145082765336	0.006	0.00414802773794992
102	102	hsa:79053	1	1	NA	1	0.483690360272639	0.018	0.0903129033795475
103	103	hsa:79796	16	682	0.0226035486711319	0.798	69.7235150925024	0.021	0.0852794430429323
104	104	hsa:247	3	499	-0.0601885275015728	0.044	73.1246105160662	0.152	0.0401777614165998
105	105	hsa:248	8	310	-0.0538799913840484	0.109	52.3192307692308	0.523	0.220308181133684
106	106	hsa:249	8	310	-0.0683171171287009	0.062	44.9574245374878	0.374	0.110470423267202
107	107	hsa:250	6	14	0.0363136519601281	0.576	2.36538461538462	0.027	0.0803037789182185
108	108	hsa:251	8	310	-0.0640099083430035	0.074	40.4855160662123	0.327	0.114250501140893
109	109	hsa:23600	3	55	-0.160724003228045	0.061	8.78442064264849	0.287	0.0883255194468947
110	110	hsa:267	21	1957	-0.0190033706639135	0.169	243.356037000974	0.502	0.294134340585523
111	111	hsa:268	2	14	-0.0855920985021826	0.388	2.50963972736125	0.026	0.0564565707670633
112	112	hsa:154796	2	49	0.0673435029701474	0.66	8.23882667964947	0.061	0.1695910975341
113	113	hsa:270	6	1744	-0.0122180924506108	0.252	320.907546251217	0.498	0.385960612949665
114	114	hsa:271	11	1919	-0.00910321858965309	0.311	226.384420642649	0.408	0.388841991412577
115	115	hsa:272	3	276	0.0463058439734086	0.814	35.2550632911392	0.116	0.317260863120767
116	116	hsa:275	4	330	-0.0601000063655082	0.071	37.5757302823759	0.145	0.057405917981882
117	117	hsa:10393	3	298	-0.078703952304816	0.055	40.169182083739	0.072	0.0258647845647144
118	118	hsa:25847	3	298	-0.0747020564249101	0.067	58.0888023369036	0.128	0.04938736309783
119	119	hsa:29882	3	298	-0.0832551280113757	0.054	36.3975657254138	0.654	0.15339219105254
120	120	hsa:29945	3	298	-0.0683461041450596	0.084	50.6375121713729	0.546	0.187220277864759
121	121	hsa:51433	3	298	-0.0774484555581789	0.065	43.1139240506329	0.613	0.168255806540717
122	122	hsa:285	2	167	-0.12553045029751	0.028	27.8557448880234	0.000999000999000999	0.000321239316031389
123	123	hsa:51129	2	48	-0.148234427475644	0.098	5.71672346640701	0.835	0.286659602134058
124	124	hsa:286	4	1170	-0.0351048585849644	0.085	144.15070593963	0.103	0.050237330892454
125	125	hsa:288	3	491	-0.0323788250809957	0.232	77.5520934761441	0.045	0.0580684356717486
126	126	hsa:290	6	906	-0.0165256311179386	0.267	157.576436222006	0.788	0.538353670506934
127	127	hsa:314	2	41	-0.144872037875034	0.147	7.23958130477118	0.26	0.162985228121298
128	128	hsa:8639	1	7	NA	1	1.54169912366115	0.099	0.327950907455907
129	129	hsa:160	23	1963	-0.00894813587041426	0.359	261.490603700097	0.471	0.469615965129384
130	130	hsa:1175	23	1963	-0.00846426100150444	0.365	318.791212268744	0.489	0.48605940385016
131	131	hsa:317	2	47	-0.0847130202385821	0.248	8.49873417721519	0.039	0.0545357670423568
132	132	hsa:322	6	1310	-0.027993381579079	0.095	171.099537487829	0.28	0.123074052080973
133	133	hsa:324	2	93	0.0523432458740358	0.735	10.4403359298929	0.073	0.210605566037491
134	134	hsa:348	4	91	-0.106876897823819	0.094	12.7148977604674	0.54	0.202057623250261
135	135	hsa:353	1	26	NA	1	3.86409444985394	0.12	0.374431624344011
136	136	hsa:359	2	112	-0.05834100800461	0.212	18.4599074975657	0.02	0.0274039341212903
137	137	hsa:79658	4	1249	-0.0122717353381431	0.326	154.412049659202	0.187	0.231503472971052
138	138	hsa:397	3	762	0.0932601543056792	0.999	79.2015579357352	0.041	0.171830529684851
139	139	hsa:9138	4	1181	-0.0144573311999916	0.308	199.306037000974	0.56	0.475609114012784
140	140	hsa:9826	21	1963	-0.00914063008610951	0.363	320.688899707887	0.49	0.484998543898628
141	141	hsa:23365	2	93	0.00498507103562246	0.527	14.6306718597858	0.072	0.162083255777598
142	142	hsa:9181	3	412	-0.0204710378652662	0.315	68.2919912366115	0.032	0.0564197963246963
143	143	hsa:9459	5	1612	-0.00517629402401553	0.413	194.691772151899	0.125	0.204628553880061
144	144	hsa:8874	21	1963	-0.0124300745967637	0.287	289.627604673807	0.516	0.430936106140076
145	145	hsa:405	4	1452	-0.0230288066008811	0.132	226.956499513145	0.66	0.29973364188714
146	146	hsa:10095	3	329	-0.00861317057700733	0.425	52.9487098344693	0.021	0.0510411731404992
147	147	hsa:10109	3	329	-0.0113004797970336	0.412	61.8303797468354	0.023	0.0536246175986887
148	148	hsa:10093	13	1926	-0.00882354342462073	0.363	204.06158714703	0.436	0.450029594644095
149	149	hsa:81873	22	1963	-0.00655180030389279	0.41	383.227896786758	0.504	0.532465226183402
150	150	hsa:408	21	1963	-0.0166764194547948	0.218	318.36370496592	0.492	0.346708964734411
151	151	hsa:409	3	469	0.00918679036381818	0.594	76.2405306718598	0.18	0.345958305534105
152	152	hsa:410	6	1439	-2.87602549497038e-05	0.529	200.186197663096	0.35	0.497421948095909
153	153	hsa:427	2	37	-0.201824281822185	0.081	7.04118792599805	0.016	0.00991242059464346
154	154	hsa:55870	7	1612	-0.018614812550855	0.193	296.57259006816	0.269	0.205493144405668
155	155	hsa:435	12	1926	-0.0233605468258625	0.112	237.828724440117	0.506	0.219347560185057
156	156	hsa:440	3	246	-0.124401166214239	0.007	32.3155063291139	0.181	0.00971928797947385
157	157	hsa:466	2	92	-0.140547772217902	0.064	11.8307935735151	0.143	0.0521095005914426
158	158	hsa:1386	19	1959	-0.0229697115622093	0.119	280.806572541383	0.486	0.222671219954032
159	159	hsa:467	2	92	-0.140547772217902	0.064	9.02974683544304	0.565	0.156204031043447
160	160	hsa:22926	3	235	-0.016079807225025	0.356	22.6124391431353	0.264	0.316221453961214
161	161	hsa:471	2	115	0.00340030674984105	0.542	14.5944741966894	0.016	0.0498436713949182
162	162	hsa:472	2	107	-0.115459872640194	0.068	23.5541382667965	0.249	0.0859900078604688
163	163	hsa:476	12	1931	-0.0244511236175938	0.123	281.6397030185	0.424	0.206187768960313
164	164	hsa:480	20	1963	-0.025244032963	0.116	299.835832521909	0.502	0.223804224632981
165	165	hsa:482	1	9	NA	1	2.22587633885102	0.028	0.128115421526594
166	166	hsa:487	3	132	-0.167314133404622	0.014	13.7116358325219	0.13	0.013302232175766
167	167	hsa:488	4	1170	0.0303132742086681	0.903	174.139581304771	0.017	0.0794655976131985
168	168	hsa:489	3	132	-0.109266372835672	0.064	15.6703992210321	0.608	0.165237963284747
169	169	hsa:490	2	101	-0.122006100457538	0.085	10.196835443038	0.66	0.217702752068041
170	170	hsa:491	2	90	-0.140547916899285	0.066	10.5937195715677	0.496	0.144669546453274
171	171	hsa:493	2	90	-0.140547916899285	0.064	11.8917478091529	0.814	0.206022337689733
172	172	hsa:506	4	105	0.0438786170833363	0.694	20.9503407984421	0.001	0.00574148878663548
173	173	hsa:513	3	18	-0.0980392156862745	0.398	2.73201071080818	0.042	0.0851076574273714
174	174	hsa:514	3	18	-0.137254901960784	0.347	3.29544790652386	0.024	0.0482035628601913
175	175	hsa:521	7	1673	-0.0365088166032985	0.034	245.8961781889	0.423	0.075387249100569
176	176	hsa:522	7	1673	-0.0359788795302764	0.038	187.961854917235	0.219	0.0481748319066028
177	177	hsa:10632	7	1673	-0.036846367280174	0.031	173.517478091529	0.689	0.10351173899938
178	178	hsa:535	4	119	-0.0242801881887682	0.355	14.618135345667	0.022	0.0457068559611696
179	179	hsa:533	7	1674	-0.0356127870979201	0.031	252.590360272639	0.833	0.120244533815217
180	180	hsa:9114	3	25	0	0.524	3.96587147030185	0.029	0.0788174433714081
181	181	hsa:523	7	1673	-0.0362359777142178	0.035	235.930525803311	0.616	0.104283898890215
182	182	hsa:525	7	1673	-0.0367064499011582	0.033	205.82711781889	0.321	0.0587653229245849
183	183	hsa:526	7	1673	-0.0360156078422681	0.033	253.702507302824	0.225	0.0438290517626283
184	184	hsa:528	7	1673	-0.0361677679919477	0.035	218.537828627069	0.695	0.114722797083387
185	185	hsa:51382	7	1673	-0.0370579923159353	0.031	290.829552093476	0.56	0.0877302628508589
186	186	hsa:529	7	1673	-0.0380251711983815	0.028	200.241991236612	0.339	0.0536991479863587
187	187	hsa:534	7	1673	-0.0363531585191435	0.036	269.41200097371	0.138	0.0313219380578556
188	188	hsa:51606	7	1674	-0.0362513864121622	0.029	231.624829600779	0.336	0.0548694731667342
189	189	hsa:545	19	1957	-0.0311528721039499	0.04	228.092185978578	0.521	0.101509161334101
190	190	hsa:549	4	265	-0.0316381641254584	0.268	33.4450584225901	0.685	0.494767328020719
191	191	hsa:8312	2	135	0.0248182969463574	0.621	17.4759980525803	0.02	0.0669245142547619
192	192	hsa:8313	2	135	0.0274585413023528	0.629	17.8986368062317	0.056	0.153084476553262
193	193	hsa:79369	3	37	-0.186026972791675	0.078	6.04814995131451	0.334	0.121080857554139
194	194	hsa:84002	3	39	-0.0840732904545146	0.247	5.55209347614411	0.202	0.199468953617218
195	195	hsa:192134	6	381	0.00475686748688101	0.552	71.8809639727361	0.357	0.517140616302499
196	196	hsa:2683	2	36	-0.133099284374987	0.17	5.6722005842259	0.791	0.404272511173591
197	197	hsa:8704	2	36	-0.133099284374987	0.174	5.48261927945472	0.399	0.254619427464964
198	198	hsa:8703	4	62	0.0139464584971219	0.545	10.039435248296	0.141	0.274026570659757
199	199	hsa:8702	2	12	0.130558241966773	0.683	2.42999026290166	0.033	0.108018340898198
200	200	hsa:9334	3	7	0.276026223736942	0.794	0.958763388510224	0.429	0.707470043779597
201	201	hsa:9331	4	150	0.0196244935703424	0.637	25.416553067186	0.068	0.179295025170608
202	202	hsa:572	1	18	NA	1	3.64805258033106	0.013	0.0694564769797678
203	203	hsa:9530	1	1	NA	1	0.467940603700097	0.002	0.0144292161968444
204	204	hsa:10458	2	116	-0.167877739915831	0.012	12.4043573515093	0.472	0.0349674115615538
205	205	hsa:25805	1	13	NA	1	2.00153359298929	0.07	0.256148202585295
206	206	hsa:581	18	1957	-0.0297735496099207	0.069	282.908787731256	0.517	0.154583993333422
207	207	hsa:27113	12	1926	-0.0219616851848185	0.129	216.517332035054	0.519	0.247972730200008
208	208	hsa:587	5	510	-0.0549627902700232	0.057	81.6603456669912	0.351	0.0982678430447438
209	209	hsa:593	3	139	-0.075636998427725	0.118	17.7306718597858	0.129	0.0789262759405225
210	210	hsa:594	2	25	-0.0710669054518701	0.4	4.96893865628043	0.024	0.0542015249328801
211	211	hsa:8915	12	1926	-0.0280447336795312	0.075	228.76764849075	0.501	0.160874219101117
212	212	hsa:598	4	1451	-0.0263458299690393	0.094	211.399172346641	0.463	0.179941218141825
213	213	hsa:10018	2	63	-0.163892450956453	0.053	9.11993670886076	0.058	0.0208564002985033
214	214	hsa:599	21	1957	-0.0262071163762968	0.084	267.388851022395	0.504	0.176207406101076
215	215	hsa:604	18	1959	-0.0206439127966952	0.128	277.663266796495	0.507	0.242384567073269
216	216	hsa:613	4	1343	-0.0639069416474728	0.003	139.802361246349	0.708	0.0151960606689796
217	217	hsa:8678	6	1394	-0.0315347292192191	0.073	190.922638753651	0.431	0.140291724449444
218	218	hsa:637	19	1957	-0.0273748931062265	0.082	182.823855890945	0.467	0.163226721858774
219	219	hsa:329	12	1926	-0.0311846390385938	0.056	261.100584225901	0.412	0.110033494668518
220	220	hsa:332	19	1957	-0.0194513784732739	0.182	365.665847127556	0.484	0.302090657715882
221	221	hsa:79444	21	1963	-0.0306242059540309	0.053	366.407181110029	0.51	0.124630138042293
222	222	hsa:641	4	61	-0.273614688102466	0.003	12.3157254138267	0.001	4.11506948078884e-05
223	223	hsa:644	5	1478	-0.0337362606259744	0.053	253.004819863681	0.598	0.141089894360287
224	224	hsa:648	4	47	-0.22247610418464	0.058	5.83181596884129	0.274	0.0817157015968453
225	225	hsa:650	3	238	-0.0549610349840197	0.146	31.2659688412853	0.444	0.242187609328748
226	226	hsa:652	2	56	-0.107889812495025	0.189	7.94406037000974	0.127	0.113524023684074
227	227	hsa:655	2	14	-0.0872225706944371	0.419	2.86351022395326	0.077	0.143048793316888
228	228	hsa:656	12	1916	-0.00971867653620253	0.326	263.979138266796	0.34	0.354651152238159
229	229	hsa:669	3	188	-0.0676405055476062	0.12	24.5200097370983	0.745	0.305268332954159
230	230	hsa:10380	20	1959	-0.0203563090927501	0.137	210.961270691334	0.502	0.252877150288853
231	231	hsa:8315	4	1197	-0.0410784109371531	0.042	141.408641674781	0.069	0.0198331423928724
232	232	hsa:683	20	1963	0.000334578609073125	0.538	210.998539435248	0.501	0.622914688909475
233	233	hsa:7832	10	1809	-0.00569639179196313	0.396	295.879479065239	0.49	0.512205633025618
234	234	hsa:10950	25	1963	-0.00640036586944378	0.379	279.292453748783	0.502	0.505967222858286
235	235	hsa:8945	2	141	0.0035367056337735	0.54	25.5927945472249	0.186	0.33127068015694
236	236	hsa:699	2	29	-0.175966217728983	0.158	5.97782375851996	0.061	0.0543779975264434
237	237	hsa:701	4	329	-0.0596356433305486	0.105	60.3072054527751	0.002	0.00198836463572183
238	238	hsa:9184	3	78	-0.0969668891894907	0.146	14.1574245374878	0.016	0.0164905603399417
239	239	hsa:715	3	39	-0.345816299660933	0.004	10.2088364167478	0.000999000999000999	5.36671955931167e-05
240	240	hsa:717	3	43	-0.35547349270459	0.004	7.90562317429406	0.035	0.0013823415389497
241	241	hsa:718	2	39	-0.433377528897063	0.003	7.51329113924051	0.000999000999000999	4.11125807281596e-05
242	242	hsa:725	4	43	-0.386512308364067	0.003	6.26073515092502	0.884	0.0183848340800584
243	243	hsa:733	6	41	-0.322353752447245	0.009	5.11292599805258	0.238	0.015306764787501
244	244	hsa:773	5	1688	-0.0320446554536809	0.073	266.255915287244	0.483	0.153201570136675
245	245	hsa:775	2	241	0.0100172064698879	0.588	37.6536757546251	0.223	0.397517070725311
246	246	hsa:777	5	1591	-0.0427715391761765	0.016	176.122273612463	0.405	0.0391329453006443
247	247	hsa:8912	19	1957	-0.0162048933571344	0.205	202.762025316456	0.483	0.327985595851034
248	248	hsa:9254	2	154	-0.0402029119703289	0.294	19.2176241480039	0.038	0.061382818216406
249	249	hsa:93589	2	154	-0.0402029119703289	0.289	26.4171616358325	0.087	0.117749087912353
250	250	hsa:783	2	154	-0.0369284666514786	0.303	30.5775316455696	0.316	0.320376210775533
251	251	hsa:784	5	1682	0.00375498101822201	0.568	228.949488802337	0.194	0.353223869767972
252	252	hsa:10368	3	815	0.0615463711145868	0.977	126.441285296982	0.075	0.264781835187024
253	253	hsa:27091	11	1925	-0.00783140727164542	0.341	256.568719571568	0.477	0.458060262860865
254	254	hsa:59285	2	154	-0.0398390847126789	0.293	29.278164556962	0.254	0.267770630016496
255	255	hsa:59284	2	154	-0.041658221000929	0.28	18.3851509250243	0.507	0.419095724672898
256	256	hsa:59283	19	1957	-0.0084513075554081	0.339	237.481183057449	0.486	0.461855189153385
257	257	hsa:790	3	278	-0.0776358428255006	0.049	47.3280428432327	0.83	0.170906099617092
258	258	hsa:800	4	1344	-0.0313331667414519	0.085	198.873709834469	0.06	0.0320204251701845
259	259	hsa:805	20	1963	-0.0107431499914775	0.308	314.040214216164	0.511	0.448404893991256
260	260	hsa:8536	2	53	-0.0693503493732699	0.294	7.55158227848101	0.346	0.334213389791626
261	261	hsa:815	3	1228	-0.0241810430777449	0.142	180.458495618306	0.378	0.210666990721408
262	262	hsa:817	3	1228	-0.0254354574644226	0.127	152.425876338851	0.767	0.324258651201514
263	263	hsa:818	3	1228	-0.0229649899872959	0.145	203.023490749757	0.545	0.279589740425078
264	264	hsa:814	20	1963	-0.0247978631940089	0.103	278.606499513145	0.487	0.200268667641513
265	265	hsa:10645	18	1957	-0.014183762029095	0.24	286.086757546251	0.45	0.348367397600655
266	266	hsa:823	5	1132	-0.0438212104326071	0.035	194.505185004869	0.211	0.0436328277207461
267	267	hsa:824	3	489	-0.0487468514363537	0.12	77.4802580331061	0.015	0.013175943505344
268	268	hsa:84433	5	1682	-0.0406169388433709	0.027	227.131475170399	0.463	0.0672797149200593
269	269	hsa:22794	3	5	-0.516397779494322	0.185	0.902336903602726	0.065	0.0651847287424585
270	270	hsa:8573	6	1030	0.00605479803589432	0.606	146.434225900682	0.276	0.466348147736476
271	271	hsa:836	2	240	-0.0421814626232743	0.201	30.6410662122687	0.128	0.119896992330637
272	272	hsa:839	2	31	0.283349145668828	0.971	6.28919182083739	0.001	0.00770700575107244
273	273	hsa:840	5	1536	-0.0369904419618007	0.054	228.387074001947	0.248	0.0711530052720274
274	274	hsa:841	20	1963	-0.0307328134497745	0.066	319.219790652386	0.486	0.14240612333179
275	275	hsa:842	4	1434	-0.0375402133238237	0.044	138.4532375852	0.362	0.081864770672244
276	276	hsa:847	5	1652	-0.0333375689010106	0.052	218.802312560857	0.39	0.0993338756332557
277	277	hsa:857	3	551	-0.0426984078541112	0.172	82.1805258033106	0.000999000999000999	0.00166140927074449
278	278	hsa:858	3	551	-0.0476753717240076	0.14	76.0211538461539	0.039	0.0339082734311703
279	279	hsa:859	4	1157	-0.0326689040047794	0.119	192.333081791626	0.46	0.213768489895732
280	280	hsa:867	2	349	-0.0475264180725976	0.162	57.9989289191821	0.01	0.0120290331901753
281	281	hsa:868	4	1492	-0.0312617009190671	0.079	178.65311587147	0.262	0.100959011339535
282	282	hsa:23624	4	1492	-0.0324983592346042	0.07	164.525048685492	0.345	0.114071822208038
283	283	hsa:873	3	150	-0.0550630957628511	0.206	19.3085929892892	0.634	0.396459600118452
284	284	hsa:875	3	94	-0.117264640810886	0.067	13.2580574488802	0.434	0.131949375055263
285	285	hsa:8030	2	65	-0.0195336346224373	0.433	11.4222005842259	0.008	0.0230887075826087
286	286	hsa:6363	2	40	0.138994853572243	0.857	6.99610516066212	0.001	0.00690919625193709
287	287	hsa:6347	3	172	-0.0919111064972473	0.096	35.6203261927946	0.000999000999000999	0.000983224314900734
288	288	hsa:6366	3	317	-0.0691966267080507	0.095	40.1307935735151	0.032	0.0206595292012346
289	289	hsa:6370	3	172	-0.114436975260567	0.057	26.3099561830575	0.047	0.0185448730132763
290	290	hsa:6355	1	5	NA	1	1.3351752677702	0.000999000999000999	0.00790085392538984
291	291	hsa:890	3	389	-0.0306679694736692	0.237	75.4188899707887	0.002	0.0041021397339916
292	292	hsa:891	2	92	0.0219491369351825	0.564	17.0608568646543	0.063	0.154113710383214
293	293	hsa:595	17	1957	-0.026823023577165	0.092	318.970180136319	0.495	0.186220538503502
294	294	hsa:894	4	1465	-0.01084868367342	0.306	197.407643622201	0.063	0.0954027876856213
295	295	hsa:896	2	245	-0.0346288977360115	0.272	38.1057448880234	0.239	0.242690787042408
296	296	hsa:898	3	436	-0.0398665643446805	0.154	74.6291869522882	0.096	0.0770868771522002
297	297	hsa:9134	2	63	0.229807311437176	0.989	13.5899951314508	0.000999000999000999	0.00782487288080043
298	298	hsa:901	2	84	-0.0353224536057801	0.374	14.883982473223	0.101	0.161526694921844
299	299	hsa:902	2	30	-0.222585249782035	0.107	5.99318403115872	0.002	0.00202220039218968
300	300	hsa:1230	2	151	-0.180351132366717	0.014	30.7731986368062	0.000999000999000999	0.000170314024177372
301	301	hsa:1235	2	151	-0.180755507102965	0.013	21.4000243427459	0.166	0.0154050414234115
302	302	hsa:10666	2	30	-0.378243271171803	0.006	2.70545277507303	0.894	0.0334072350619503
303	303	hsa:940	4	1309	-0.0705805326869219	0.004	177.009201557936	0.022	0.000909759289426775
304	304	hsa:947	15	1926	-0.0361977689127033	0.05	224.929771178189	0.531	0.122892662855861
305	305	hsa:916	3	699	-0.0248010392032442	0.212	114.268111002921	0.000999000999000999	0.00200350034178679
306	306	hsa:917	4	1326	-0.0529287127575146	0.019	267.827069133398	0.132	0.0175265802977783
307	307	hsa:960	4	1216	-0.0480345937499959	0.034	186.566260954236	0.003	0.00103943484995736
308	308	hsa:961	4	832	-0.0702991522709739	0.019	130.628870496592	0.544	0.0575934564229514
309	309	hsa:966	8	347	-0.0310313256608723	0.278	50.4085929892892	0.001	0.00255423326550807
310	310	hsa:967	4	1093	-0.0666162329424783	0.001	192.050073028238	0.552	0.00469308330645133
311	311	hsa:972	1	10	NA	1	2.84530185004869	0.000999000999000999	0.00790085392538984
312	312	hsa:942	5	1403	-0.0651352557323429	0.002	188.428675754625	0.088	0.001697524675075
313	313	hsa:925	5	1342	-0.069650381393297	0.007	234.566139240506	0.151	0.0082999028447034
314	314	hsa:978	2	46	-0.263848572401677	0.013	8.87962512171373	0.004	0.000564941875647909
315	315	hsa:8881	3	298	-0.0825489110913923	0.051	34.4757546251217	0.744	0.162083255777598
316	316	hsa:991	2	48	0.0920870353013876	0.8	11.4613437195716	0.001	0.00650471906423708
317	317	hsa:8697	3	298	-0.0728188113049544	0.073	30.1488072054528	0.145	0.0587289394079743
318	318	hsa:993	2	50	-0.315205433313469	0.003	12.4996348588121	0.115	0.00309532831862186
319	319	hsa:994	18	1957	-0.0288449808309963	0.07	241.852336903603	0.527	0.15862016676841
320	320	hsa:995	2	207	-0.0956511428247149	0.049	44.3673807205453	0.611	0.13498277482912
321	321	hsa:996	3	298	-0.0798025119581235	0.057	46.692964946446	0.163	0.0527608861488996
322	322	hsa:990	2	34	-0.295540231644524	0.036	9.50537974683544	0.000999000999000999	0.000403983696617667
323	323	hsa:8317	5	35	-0.480747005320628	0.007	10.838388510224	0.000999000999000999	9.00041951695248e-05
324	324	hsa:999	1	3	NA	1	0.86952288218111	0.013	0.0694564769797678
325	325	hsa:1017	2	125	0.080877765196782	0.855	27.085564751704	0.000999000999000999	0.00688903530859472
326	326	hsa:1019	2	189	-0.0868541991509711	0.089	38.4709104186952	0.153	0.0721215726455562
327	327	hsa:8851	19	1957	-0.0311230687615596	0.068	385.962195715677	0.509	0.151031359991857
328	328	hsa:1026	2	339	-0.0624653608494428	0.093	58.3087877312561	0.000999000999000999	0.000955448234324078
329	329	hsa:1027	2	245	-0.11709062864087	0.014	41.5651168451801	0.414	0.0356488037272194
330	330	hsa:1028	2	80	-0.198232083780711	0.022	12.6571811100292	0.131	0.0197395983920087
331	331	hsa:1029	2	58	-0.273475994996427	0.006	9.8508276533593	0.757	0.029043309547927
332	332	hsa:1030	1	13	NA	1	2.55832521908471	0.034	0.148967421648443
333	333	hsa:1031	2	41	-0.315758391651725	0.008	7.24715189873418	0.04	0.00289510065989456
334	334	hsa:1032	2	85	-0.234311674451602	0.004	13.8368792599805	0.574	0.016247843294005
335	335	hsa:8760	4	1077	-0.0251446268338759	0.154	189.560954235638	0.146	0.10780968579011
336	336	hsa:1051	4	1325	-0.0327792572268619	0.087	179.974269717624	0.181	0.0811144568604667
337	337	hsa:1054	21	1963	-0.0326625268117192	0.055	258.471835443038	0.513	0.128883341600135
338	338	hsa:1056	2	59	-0.138252194979934	0.107	8.22166504381694	0.213	0.108972649411659
339	339	hsa:64781	5	1039	0.0291956972536106	0.872	154.793135345667	0.035	0.137015666174711
340	340	hsa:1073	21	1963	-0.00635939479343809	0.415	286.225389483934	0.506	0.537720420419999
341	341	hsa:8837	4	1237	-0.020709157948712	0.169	153.072370983447	0.062	0.0582417268048832
342	342	hsa:1081	3	135	-0.114201705312764	0.051	23.8872930866602	0.634	0.143292517479935
343	343	hsa:57530	2	39	-0.027992797446733	0.439	5.79026290165531	0.108	0.191965494661069
344	344	hsa:1103	8	1660	-0.0243144471754758	0.116	185.767745861733	0.179	0.10121483562496
345	345	hsa:57680	20	1959	-0.00346868292742719	0.474	239.064216163583	0.493	0.573407504049215
346	346	hsa:1111	2	60	-0.0818714630265965	0.222	12.375876338851	0.025	0.034376463299292
347	347	hsa:1119	8	1787	-0.0241553047758933	0.117	241.075243427459	0.504	0.225892276619251
348	348	hsa:56994	1	25	NA	1	3.44500973709834	0.036	0.155672508258937
349	349	hsa:8646	3	59	-0.110886379467584	0.178	10.7258033106134	0.225	0.168915945548984
350	350	hsa:8973	5	1449	-0.0697738517108319	0.001	186.996105160662	0.206	0.00195445268416999
351	351	hsa:1141	5	1449	-0.0705025227948455	0.001	189.58135345667	0.112	0.00113086530890695
352	352	hsa:1147	18	1959	-0.0406692377070309	0.016	234.292745861733	0.527	0.0487008818935282
353	353	hsa:84916	7	13	-0.264401360325626	0.132	2.09264849074976	0.029	0.0251324002190384
354	354	hsa:1154	2	82	-0.0471314861806665	0.298	13.1095666991237	0.026	0.0454057634930729
355	355	hsa:10970	4	16	-0.319321612382926	0.079	2.0952288218111	0.183	0.0757051872217454
356	356	hsa:1152	4	45	-0.220574700845765	0.034	6.04386562804284	0.049	0.0123239513389057
357	357	hsa:1179	3	103	-0.160911484579758	0.024	14.7696932814021	0.605	0.0759719544743813
358	358	hsa:9076	4	960	0.0135647941086124	0.701	123.30282375852	0.013	0.0519263598456352
359	359	hsa:9071	2	30	0.00331651700530421	0.49	5.26740506329114	0.234	0.362988799345208
360	360	hsa:5010	13	1926	-0.0113369898078782	0.296	284.145691333982	0.473	0.41527152856648
361	361	hsa:23562	13	1926	-0.0103230425559891	0.322	306.132132424538	0.508	0.459726678146494
362	362	hsa:24146	13	1926	-0.01026883395443	0.321	242.053578383642	0.494	0.45059339945685
363	363	hsa:9075	5	1506	0.00399290390389076	0.603	179.448369036027	0.12	0.262384713111407
364	364	hsa:1364	2	30	-0.00331651700530421	0.473	4.25637779941577	0.235	0.355343600338004
365	365	hsa:1366	4	960	0.0144795682777866	0.711	176.285394352483	0.087	0.23400070159804
366	366	hsa:9575	5	1582	-0.0104227426838906	0.309	168.126728334956	0.442	0.408485594995096
367	367	hsa:1212	2	7	-0.690065559342354	0.067	0.661684518013632	0.885	0.226817030256959
368	368	hsa:1213	2	7	-0.690065559342354	0.073	1.32585199610516	0.037	0.0186750737844677
369	369	hsa:55907	4	15	-0.419912527334259	0.03	1.85070593962999	0.33	0.0555906831662318
370	370	hsa:84735	7	1798	-0.00735832130695943	0.35	251.134225900682	0.499	0.479409238894922
371	371	hsa:55748	7	1798	-0.00690145333702148	0.361	290.95141187926	0.507	0.493829101358452
372	372	hsa:4848	7	33	-0.0457526112414002	0.362	4.95034079844207	0.073	0.122442410871269
373	373	hsa:4849	8	82	-0.0270531810088323	0.369	15.2950584225901	0.018	0.0399472606003352
374	374	hsa:4850	6	18	0.177950592399576	0.838	2.99352482960078	0.061	0.203123435252763
375	375	hsa:246175	9	1204	0.00139684537092568	0.503	216.063729308666	0.133	0.247832112698842
376	376	hsa:9337	3	14	-0.15839229598608	0.277	1.49264849074976	0.595	0.461965179273613
377	377	hsa:1271	4	1310	-0.0552650698763683	0.01	170.980452775073	0.684	0.0409371780238581
378	378	hsa:26047	6	102	-0.0277831866651367	0.376	12.3200827653359	0.056	0.102344156105159
379	379	hsa:80347	6	1632	-0.0200908698343578	0.162	225.950073028238	0.551	0.304935006814887
380	380	hsa:1302	4	1194	-0.049807074385989	0.035	170.753359298929	0.372	0.0695433177214663
381	381	hsa:1277	3	595	-0.0288122978018828	0.231	107.040433300876	0.000999000999000999	0.0021632520802559
382	382	hsa:1278	3	595	-0.0288122978018828	0.236	105.370180136319	0.000999000999000999	0.0022050270407314
383	383	hsa:81578	13	1926	-0.0336141912933605	0.06	252.448198636806	0.483	0.131602507933757
384	384	hsa:1281	3	595	-0.0291500971554221	0.235	89.2453018500487	0.001	0.00219864238529773
385	385	hsa:1282	2	116	0.0501436841882546	0.707	20.029406037001	0.000999000999000999	0.00583079313729007
386	386	hsa:1285	4	1194	-0.0491328357787001	0.036	165.346348588121	0.018	0.00540536967032458
387	387	hsa:1287	1	18	NA	1	4.31801363193768	0.027	0.124521797150401
388	388	hsa:1289	3	595	-0.0290110033039647	0.237	109.603675754625	0.000999000999000999	0.00221336926110634
389	389	hsa:1291	3	595	-0.0288122978018828	0.242	110.297103213242	0.001	0.00225703062529744
390	390	hsa:1292	2	116	0.0478114198074056	0.698	25.5200097370983	0.000999000999000999	0.00576550158537805
391	391	hsa:1293	4	1194	-0.0477475149243795	0.04	220.260832521908	0.005	0.00190343863828325
392	392	hsa:1312	4	590	-0.0535347182534818	0.052	76.9277020447907	0.394	0.10014362157558
393	393	hsa:1352	9	12	0.35668561398608	0.946	1.72110516066212	0.057	0.21138592603396
394	394	hsa:1355	12	90	0.000679988957069005	0.511	14.3475657254138	0.009	0.0293504334795616
395	395	hsa:1371	2	4	0	0.65	0.641845180136319	0.203	0.399192585905529
396	396	hsa:1373	2	16	-0.160793970206289	0.273	2.51652872444012	0.106	0.131453749211893
397	397	hsa:53981	4	9	-0.440958551844098	0.083	1.20572054527751	0.417	0.151027996422575
398	398	hsa:51692	10	29	-0.0927153131137703	0.25	5.20754625121714	0.106	0.122711179468734
399	399	hsa:10898	9	23	-0.0646161676610249	0.371	3.36869522882181	0.011	0.0265322673612611
400	400	hsa:11052	12	29	-0.111417202906231	0.223	3.67543816942551	0.623	0.413145985961614
401	401	hsa:1376	2	55	0.0962666917159959	0.786	7.45961538461539	0.087	0.251826674624981
402	402	hsa:92359	4	147	-0.0254671194208276	0.371	18.4359298928919	0.257	0.319434609640284
403	403	hsa:1385	2	380	-0.0985549032370462	0.018	49.8161635832522	0.522	0.0532515595096947
404	404	hsa:10488	18	1957	-0.0166996946638131	0.212	314.016918208374	0.537	0.361218609035857
405	405	hsa:84699	2	353	-0.0392351231608771	0.183	42.146129503408	0.171	0.139703244035872
406	406	hsa:148327	19	1959	-0.0164053709599859	0.217	342.675389483934	0.487	0.343176603567059
407	407	hsa:1387	17	1957	-0.013701963406626	0.243	271.157960077897	0.478	0.366214789438192
408	408	hsa:1390	21	1963	-0.0186838493649075	0.17	316.989216163583	0.513	0.299953237607568
409	409	hsa:1394	3	628	0.0859382873347887	0.987	70.7649464459591	0.057	0.21816054545492
410	410	hsa:1398	4	1449	-0.0452992356790356	0.035	211.289313534567	0.529	0.0923745578063757
411	411	hsa:1399	4	1449	-0.043870163193789	0.039	175.255063291139	0.454	0.0891293784444238
412	412	hsa:1407	16	1953	0.00282596521031618	0.587	298.149221032132	0.484	0.641629743412944
413	413	hsa:1437	4	1420	-0.040752684928166	0.036	219.791918208374	0.166	0.0365731428949621
414	414	hsa:1439	3	828	-0.0498371559248796	0.043	144.626265822785	0.005	0.00203064759391487
415	415	hsa:1441	1	21	NA	1	3.7426241480039	0.004	0.026085843671449
416	416	hsa:1445	4	1125	-0.045073694816876	0.04	145.932692307692	0.5	0.0982404601085629
417	417	hsa:122011	2	75	-0.0387492129146064	0.357	12.7527507302824	0.185	0.245516934625816
418	418	hsa:1453	2	115	-0.120737673394485	0.069	14.2938656280428	0.949	0.243981895276749
419	419	hsa:1454	2	157	-0.138115309542678	0.023	16.0902872444012	0.917	0.102479246972502
420	420	hsa:53944	3	204	-0.0382055822095649	0.239	22.5942064264849	0.361	0.297677135266498
421	421	hsa:1456	3	204	-0.0318720364956798	0.275	34.0860516066212	0.457	0.386331996522285
422	422	hsa:1457	18	1957	-0.00729071034866964	0.365	220.988851022395	0.502	0.494173707507758
423	423	hsa:1459	17	1955	-0.00668380106350586	0.37	271.256888997079	0.493	0.492780319182659
424	424	hsa:1460	1	9	NA	1	1.60377312560857	0.137	0.4093250863821
425	425	hsa:1477	8	97	-0.0237480171233518	0.374	13.123417721519	0.077	0.130957446055769
426	426	hsa:1478	7	29	-0.108920123839802	0.228	4.15104673807206	0.685	0.446166604452962
427	427	hsa:23283	9	97	-0.0154649959339876	0.406	12.4703748782863	0.161	0.243668304779792
428	428	hsa:1479	9	97	-0.0539092930615267	0.243	12.7181110029211	0.032	0.0455418019351434
429	429	hsa:1489	5	1570	-0.0703597851444013	0.000999000999000999	176.458860759494	0.513	0.00439521293839554
430	430	hsa:1490	4	1076	0.0087757821849761	0.641	143.142210321324	0.002	0.00981926608606006
431	431	hsa:1499	3	1166	0.0145879060954144	0.736	138.504722492697	0.14	0.337212621233153
432	432	hsa:56998	2	50	0.110204081632653	0.782	5.13697663096397	0.209	0.459476774014696
433	433	hsa:1500	4	1267	-0.0515361124083135	0.013	203.772078870497	0.224	0.0199149209128621
434	434	hsa:56474	6	1674	0.0014732769781514	0.525	184.843476144109	0.272	0.420733100712146
435	435	hsa:1514	2	10	-0.447213595499958	0.083	2.38427458617332	0.058	0.0305025964873367
436	436	hsa:1520	2	10	-0.347832796499967	0.188	1.86601752677702	0.01	0.0136797889840237
437	437	hsa:2017	2	74	-0.0646017058858591	0.252	12.4058909444985	0.13	0.144751600375111
438	438	hsa:8454	19	1959	-0.025508126388695	0.079	276.424975657254	0.5	0.167142456979465
439	439	hsa:8453	2	52	-0.192232262733381	0.057	9.34196689386563	0.018	0.00808702180807164
440	440	hsa:6376	3	172	-0.0933015922233781	0.087	22.5961538461538	0.043	0.0246472130926479
441	441	hsa:1524	2	151	-0.179946757630469	0.013	31.0263631937683	0.023	0.0027254050283875
442	442	hsa:9547	3	172	-0.105259769468103	0.066	23.0955209347614	0.026	0.0126430749209045
443	443	hsa:58191	3	172	-0.0933015922233781	0.092	28.829576436222	0.000999000999000999	0.000946168208066779
444	444	hsa:2833	2	151	-0.179946757630469	0.014	22.9293816942551	0.054	0.00618972670142926
445	445	hsa:7852	2	162	-0.153269544661542	0.017	27.6713242453749	0.002	0.000383831101133836
446	446	hsa:80319	3	201	0.0184062997532497	0.627	33.6965189873418	0.014	0.0503462777047719
447	447	hsa:1535	2	136	-0.0225760594935175	0.401	19.15211781889	0.1	0.169076795681252
448	448	hsa:1536	3	753	0.0414799722099142	0.911	124.03317916261	0.01	0.0519122651918406
449	449	hsa:23191	2	79	-0.105021187889946	0.152	12.8816699123661	0.242	0.158270233966401
450	450	hsa:1584	3	174	-0.0663676205311717	0.161	27.4115628042843	0.041	0.0397415457675446
451	451	hsa:1543	3	354	-0.0463543739534736	0.13	59.344182083739	0.097	0.067756873276757
452	452	hsa:1544	3	581	-0.0314470125243204	0.189	63.2229552093476	0.317	0.228559813167736
453	453	hsa:1592	4	777	-0.0291712489414359	0.163	104.419328140214	0.38	0.234231629128833
454	454	hsa:1553	2	52	-0.120462960664047	0.154	6.59685978578384	0.913	0.416438107382918
455	455	hsa:1573	3	502	-0.0530412272687813	0.065	77.178164556962	0.942	0.232252615966132
456	456	hsa:120227	6	1381	-0.0490891469273845	0.019	192.863948393379	0.436	0.0479927686148579
457	457	hsa:29785	3	180	-0.0529641735181424	0.202	22.114435248296	0.008	0.0120033269313153
458	458	hsa:1576	2	102	-0.160078486301824	0.032	11.0861246348588	0.853	0.125589308379039
459	459	hsa:1581	3	405	-0.0500399846253108	0.134	62.8289678675755	0.369	0.198123897439501
460	460	hsa:23002	11	1916	-0.00518344570901133	0.413	236.443914313535	0.437	0.489487893002703
461	461	hsa:1603	3	16	-0.221403721385024	0.195	3.77887049659202	0.007	0.0103693601607212
462	462	hsa:1605	4	761	-0.0758670388792013	0.018	111.723442064265	0.646	0.0634230573372079
463	463	hsa:1612	5	1670	-0.0379493196255751	0.043	251.741455696203	0.282	0.065630803280779
464	464	hsa:1613	11	1919	-0.0345711335210034	0.048	211.597784810127	0.407	0.0964198569204869
465	465	hsa:27071	2	82	-0.186655961918126	0.022	11.8227361246349	0.735	0.0828647432792068
466	466	hsa:1616	20	1959	-0.0207770169717198	0.14	231.107156767283	0.512	0.260595758819412
467	467	hsa:26528	8	1204	0.000704313258381038	0.487	131.979308666018	0.142	0.25389333561645
468	468	hsa:1622	3	228	0.0379075107145172	0.746	39.8846397273612	0.133	0.328454822135177
469	469	hsa:1629	3	111	-0.0887760894362061	0.123	21.6932570593963	0.019	0.0164966194411452
470	470	hsa:1633	20	1959	-0.00723922004554357	0.36	342.755306718598	0.465	0.46660559084314
471	471	hsa:1634	4	1246	-0.0609678417421896	0.005	196.143451801363	0.016	0.000834678713863232
472	472	hsa:1635	2	92	-0.178052561145939	0.021	13.4848101265823	0.111	0.0164602584090224
473	473	hsa:51181	4	238	-0.0173226611709559	0.376	34.2209104186952	0.164	0.233463294702963
474	474	hsa:1643	4	1111	0.00536264740117629	0.587	150.744814995131	0.005	0.0200491253684356
475	475	hsa:1649	4	1353	-0.0480661211871384	0.021	150.932546251217	0.319	0.0402328342199378
476	476	hsa:54541	4	942	0.00282230421725714	0.571	123.033544303797	0.04	0.109157884863398
477	477	hsa:1650	8	42	-0.185665819466582	0.048	6.71477604673807	0.112	0.0334699581928927
478	478	hsa:1654	5	987	-0.0318043563695026	0.118	167.753213242454	0.056	0.039776685796181
479	479	hsa:1655	5	1329	-0.0763240280880736	0.000999000999000999	222.955014605648	0.107	0.00108428960134905
480	480	hsa:1676	3	242	-0.0110589644182753	0.393	51.4651168451801	0.007	0.0189703204826562
481	481	hsa:84649	3	165	-0.101419265177857	0.063	20.9788948393379	0.068	0.0276440870534832
482	482	hsa:1606	4	1316	-0.0169977640359296	0.24	234.959931840312	0.544	0.396370026946773
483	483	hsa:1607	12	1921	-0.0147587261735976	0.233	373.945131450828	0.492	0.362936818016023
484	484	hsa:8527	20	1959	-0.0146486698022397	0.252	268.61582278481	0.509	0.391683455865144
485	485	hsa:160851	1	16	NA	1	3.35555014605648	0.058	0.223144111569272
486	486	hsa:9162	4	1316	-0.0196354265189865	0.202	188.834785783836	0.132	0.123306093170211
487	487	hsa:1609	4	1316	-0.0171675446095516	0.232	207.802629016553	0.586	0.407237880191007
488	488	hsa:8525	12	1921	-0.0152751206034004	0.228	230.895934761441	0.378	0.297444316886505
489	489	hsa:1716	4	562	0.00601253874731738	0.563	83.4761927945472	0.199	0.357277714037099
490	490	hsa:1718	2	23	-0.14940010243248	0.214	3.75077896786758	0.216	0.188328415596178
491	491	hsa:79947	3	75	-0.0866539338581365	0.169	12.9969328140214	0.012	0.0146030301319175
492	492	hsa:27294	4	322	-0.044493623029052	0.163	49.4286757546251	0.46	0.269218229398224
493	493	hsa:50846	3	39	-0.278494275031145	0.02	9.44289191820837	0.043	0.00693037722509638
494	494	hsa:1723	4	370	-0.0394953011935154	0.172	43.7231742940604	0.287	0.197877265731171
495	495	hsa:9249	4	389	-0.0386548961751832	0.2	55.2998539435248	0.312	0.235509456225062
496	496	hsa:1729	2	72	0.0178721892607537	0.614	9.55175267770205	0.041	0.117863247257802
497	497	hsa:81624	4	1027	-0.0320578543709132	0.138	197.573661148978	0.457	0.237353525210317
498	498	hsa:1736	10	53	0.0716321522638487	0.725	8.01066212268744	0.008	0.0356694046962926
499	499	hsa:1737	2	48	-0.0193329081205482	0.437	8.84941577409932	0.79	0.712397439221632
500	500	hsa:1738	4	432	-0.0125676971683093	0.326	55.2838607594937	0.592	0.510484401698384
501	501	hsa:1739	21	1963	-0.0218472098452572	0.16	217.131450827653	0.498	0.281249417523438
502	502	hsa:1741	3	257	-0.0397528011390025	0.254	32.6303310613437	0.029	0.0435395454754259
503	503	hsa:1742	20	1959	-0.00776090039055024	0.371	230.429990262902	0.462	0.473711181259961
504	504	hsa:28514	12	1915	0.00323487017036154	0.587	248.208398247322	0.373	0.551517276291221
505	505	hsa:10683	5	1230	0.0599902153361188	0.997	227.448709834469	0.194	0.511184747266144
506	506	hsa:1756	4	940	0.0124438171665372	0.692	137.7032375852	0.062	0.177999695483104
507	507	hsa:3301	21	1963	-0.0246223922319083	0.094	347.176144109056	0.494	0.188979672484001
508	508	hsa:10294	2	14	-0.0994490316197694	0.362	2.15513631937683	0.076	0.126366275257005
509	509	hsa:51726	3	7	-0.50709255283711	0.083	1.10348101265823	0.372	0.138255814736839
510	510	hsa:54788	5	1322	-0.0308779880186949	0.091	187.520618305745	0.462	0.175276720354094
511	511	hsa:3300	5	1322	-0.0322890018733792	0.083	129.421932814021	0.304	0.118076733220749
512	512	hsa:64215	4	32	-0.0521197524057043	0.398	6.29924537487829	0.047	0.0931355082488407
513	513	hsa:54431	3	7	-0.50709255283711	0.092	1.38247322297955	0.065	0.0365936215718972
514	514	hsa:5611	2	25	0.0710669054518701	0.685	3.31886562804284	0.049	0.147493720265716
515	515	hsa:85479	5	1322	-0.0329432540239486	0.073	154.834152872444	0.419	0.137249380682389
516	516	hsa:10059	4	1	NA	1	0.397638753651412	0.015	0.0779955761681989
517	517	hsa:1785	4	1302	-0.0566427525967448	0.016	183.010954235638	0.977	0.0806366587913125
518	518	hsa:1786	5	602	-0.0528549429289861	0.067	115.111465433301	0.541	0.156492749219118
519	519	hsa:1788	3	267	-0.0822616866888068	0.058	36.4311343719572	0.000999000999000999	0.000623228660109445
520	520	hsa:1789	5	1243	-0.0815111798126019	0.002	159.022297955209	0.273	0.00464803880389178
521	521	hsa:1793	19	1957	-0.021193519545475	0.167	300.278140214216	0.525	0.301086337993158
522	522	hsa:1794	4	1252	-0.0322520492837792	0.094	147.145107108082	0.351	0.145550706646224
523	523	hsa:9732	12	1923	-0.0214093806803935	0.177	212.823636806232	0.374	0.24593252264195
524	524	hsa:57171	2	12	-0.355334527259351	0.132	3.11414313534567	0.012	0.0117973183451744
525	525	hsa:84444	2	13	0	0.557	2.09946445959104	0.086	0.193456922439472
526	526	hsa:1798	10	42	-0.167930369848729	0.069	4.54870983446933	0.302	0.101501419476004
527	527	hsa:8813	11	49	-0.0757391678905181	0.233	7.70898247322298	0.007	0.0120996745491649
528	528	hsa:8818	10	42	-0.0900801224917011	0.195	8.38118305744888	0.149	0.131867997168337
529	529	hsa:1806	3	170	-0.108128553482335	0.04	28.9446689386563	0.991	0.167594612815787
530	530	hsa:1807	4	248	-0.061043821204709	0.109	31.0410662122687	0.711	0.275701936569476
531	531	hsa:1808	4	1124	-0.016006435613978	0.242	188.837463485881	0.178	0.178540943090562
532	532	hsa:1813	2	145	-0.00690136570319871	0.504	23.7870983446933	0.013	0.0394953572772903
533	533	hsa:1814	3	581	0.0545749916938154	0.934	83.1405063291139	0.028	0.121445431949219
534	534	hsa:1815	11	1917	-0.0154425861455025	0.217	276.690092502434	0.38	0.288234143337461
535	535	hsa:1840	17	1948	0.000428300104615255	0.539	233.406158714703	0.454	0.589178095158443
536	536	hsa:113878	1	1	NA	1	0.291090555014606	0.043	0.178301872021409
537	537	hsa:196403	3	76	0.116773300244316	0.882	7.2758276533593	0.114	0.331518827145651
538	538	hsa:1843	3	773	0.0103817978942947	0.658	106.344936708861	0.008	0.0328834925432248
539	539	hsa:11221	4	1381	-0.0468032568507736	0.026	142.81129503408	0.127	0.0221670753343648
540	540	hsa:80824	4	1381	-0.0470919640915896	0.026	164.636976630964	0.091	0.0166721479787658
541	541	hsa:1844	18	1957	-0.0376690120465577	0.039	270.655209347614	0.489	0.0945842726608229
542	542	hsa:1845	18	1957	-0.0377392867208157	0.036	255.710856864654	0.513	0.092187006920463
543	543	hsa:1846	5	1677	-0.0407164617882505	0.025	171.412901655307	0.59	0.0769435548938956
544	544	hsa:1847	5	1677	-0.0404362007400983	0.026	216.567916260954	0.397	0.0575294372245963
545	545	hsa:1848	2	153	0.173469539080109	0.996	23.9835686465433	0.007	0.0415939281710335
546	546	hsa:1852	5	1677	-0.0411095108191956	0.024	279.622760467381	0.43	0.0575202900753444
547	547	hsa:1856	21	1963	0.0038612410412447	0.616	278.288899707887	0.522	0.68638361509756
548	548	hsa:1857	1	24	NA	1	4.11095423563778	0.058	0.223144111569272
549	549	hsa:1869	2	45	-0.242711950486767	0.053	9.21954722492697	0.011	0.00492478952565084
550	550	hsa:1875	4	1155	-0.0289038731182873	0.125	228.904771178189	0.132	0.0842225158182474
551	551	hsa:10682	3	23	-0.131876094679157	0.231	5.0156523855891	0.057	0.0701806574786976
552	552	hsa:1892	3	114	-0.209908900758351	0.005	19.8198636806232	0.000999000999000999	6.59693913379782e-05
553	553	hsa:1909	4	981	-0.00124567675649007	0.487	104.224464459591	0.118	0.221621180997367
554	554	hsa:1910	2	85	-0.00213416667470314	0.559	18.6501947419669	0.004	0.0158824571941692
555	555	hsa:8411	14	1926	-0.0217002141643696	0.124	268.177969814995	0.482	0.228151482606751
556	556	hsa:1915	8	1830	-0.0151985006757322	0.217	347.495788704966	0.398	0.297890256124872
557	557	hsa:1917	8	1830	-0.0149666117867458	0.226	197.563558909445	0.4	0.307677395447194
558	558	hsa:1938	6	1672	-0.0349351119084109	0.045	256.046445959104	0.661	0.134301477822041
559	559	hsa:29904	5	1672	-0.0361933466117008	0.038	186.861051606621	0.557	0.102768531944802
560	560	hsa:1942	4	1277	-0.039932525980035	0.046	176.665189873418	0.797	0.157867102964196
561	561	hsa:1944	4	1277	-0.0402580238543278	0.045	154.330671859786	0.382	0.0870403180303071
562	562	hsa:1945	4	1277	-0.0398208355329737	0.045	141.6647030185	0.385	0.0875883520149244
563	563	hsa:1947	13	1924	-0.0359088321500539	0.046	279.304990262902	0.491	0.108196539810711
564	564	hsa:1948	3	209	-0.056010306667112	0.159	32.4354673807205	0.031	0.0311148997965551
565	565	hsa:54583	2	132	-0.0672422153716247	0.186	23.5256815968841	0.144	0.123740756459937
566	566	hsa:112398	20	1963	-0.0203922502897526	0.18	323.229186952288	0.467	0.292211427216998
567	567	hsa:112399	2	132	-0.0683355847272609	0.183	20.8838364167478	0.053	0.0546609694357445
568	568	hsa:1958	5	1432	-0.0533799168527661	0.01	158.772030185005	0.334	0.0223839601364584
569	569	hsa:1960	3	113	-0.159161356111463	0.018	13.6360516066212	0.873	0.0809774357798068
570	570	hsa:10938	1	2	NA	1	0.76531158714703	0.004	0.026085843671449
571	571	hsa:1962	2	101	-0.200801935759839	0.014	11.7079113924051	0.521	0.0431856090430286
572	572	hsa:79813	7	1612	-0.0175624984748552	0.201	235.117624148004	0.287	0.222252056745556
573	573	hsa:9451	11	1919	-0.0197699212804014	0.152	270.331499513145	0.424	0.241157750909392
574	574	hsa:440275	20	1963	-0.0291013761090968	0.071	218.657716650438	0.495	0.152820051715561
575	575	hsa:8892	4	410	-0.0115624808566843	0.386	47.9770204479065	0.204	0.278876064759931
576	576	hsa:8891	22	1963	-0.0166311899725557	0.188	260.146299902629	0.509	0.320244816405841
577	577	hsa:8890	22	1963	-0.0168270843227762	0.186	298.830623174294	0.5	0.313889488082086
578	578	hsa:8893	22	1963	-0.0165518707878038	0.186	272.292332035054	0.499	0.313447522981798
579	579	hsa:1965	19	1957	-0.0166854332198985	0.187	246.69323271665	0.531	0.328637315123108
580	580	hsa:1978	4	1373	-0.033969233175778	0.062	175.38488315482	0.193	0.0649237584847151
581	581	hsa:1981	6	1465	-0.0212258147573723	0.16	171.274099318403	0.126	0.0988657454893041
582	582	hsa:8672	2	5	NA	1	0.929259980525803	0.053	0.208685558367791
583	583	hsa:1983	5	410	-0.0203738456539402	0.319	61.2925754625122	0.09	0.13064513592302
584	584	hsa:2001	2	64	-0.172516389835589	0.07	7.64788218111003	0.083	0.0357208950541674
585	585	hsa:2005	5	1694	-0.0398124569587859	0.034	285.98982473223	0.478	0.0832027527175224
586	586	hsa:9844	2	124	-0.151487791497075	0.023	13.0445959104187	0.973	0.107410970343163
587	587	hsa:27436	4	1357	-0.0551231224976171	0.013	272.651387536514	0.324	0.0272508720880002
588	588	hsa:55740	3	116	-0.133095785115022	0.047	15.2566212268744	0.474	0.107026979226708
589	589	hsa:2026	2	157	0.0198080054587828	0.63	22.3289191820837	0.062	0.165718157169023
590	590	hsa:5168	5	1624	-0.0232773503335498	0.135	197.457838364167	0.243	0.144905404098559
591	591	hsa:9583	2	116	-0.0920853605713542	0.116	17.1661148977605	0.138	0.0821957442406649
592	592	hsa:957	2	116	-0.0964244613312609	0.113	13.097711781889	0.638	0.26168568056417
593	593	hsa:955	2	116	-0.0944959721046357	0.112	14.3870740019474	0.22	0.115891385217406
594	594	hsa:377841	2	142	0.00170985768228518	0.485	20.778700097371	0.043	0.101567219153054
595	595	hsa:2033	3	1231	0.00165270142108633	0.523	239.380598831548	0.229	0.373937376589363
596	596	hsa:2034	11	1917	-0.0123326658200329	0.274	258.822249269718	0.372	0.334679425745906
597	597	hsa:2035	2	15	0.459335401410572	0.991	3.22796981499513	0.075	0.267518560418032
598	598	hsa:2036	2	15	0.382779501175476	0.967	2.50214216163583	0.008	0.0453474303491497
599	599	hsa:2037	6	1542	0.0303828343006656	0.932	217.989240506329	0.218	0.526974072291154
600	600	hsa:2041	5	1460	-0.039254196875048	0.044	184.324951314508	0.408	0.0901200049135705
601	601	hsa:1969	4	1365	-0.0368146846731209	0.057	210.342405063291	0.629	0.15518354498254
602	602	hsa:2043	5	1460	-0.0399295776892079	0.041	225.696032132425	0.558	0.109301464461686
603	603	hsa:2044	5	1460	-0.0399712107530944	0.041	215.803359298929	0.625	0.119519787814041
604	604	hsa:2045	5	1460	-0.0390969164114765	0.047	141.583909444985	0.454	0.103430956748746
605	605	hsa:2046	5	1460	-0.039376783118714	0.044	158.015335929893	0.605	0.123146581445324
606	606	hsa:2048	5	1448	-0.0463062988315411	0.017	205.739240506329	0.342	0.0357414863763795
607	607	hsa:2050	4	939	-0.0274744989437295	0.145	114.431548198637	0.028	0.0264166835597961
608	608	hsa:2051	3	294	-0.0128081672015946	0.378	48.2554284323272	0.002	0.00618972670142927
609	609	hsa:2052	3	150	-0.0360369802164599	0.316	19.1217137293087	0.289	0.309893533416738
610	610	hsa:29924	4	1259	-0.0317384548411209	0.087	143.35041382668	0.479	0.174105703457448
611	611	hsa:22905	2	101	-0.030787721568329	0.37	16.3667964946446	0.169	0.235869965602805
612	612	hsa:2056	2	143	-0.161602041282198	0.008	29.861270691334	0.114	0.00729588195791563
613	613	hsa:2060	4	1259	-0.032965013354962	0.081	182.437049659202	0.635	0.20406509146027
614	614	hsa:2064	3	1064	-0.0435273819348297	0.037	164.921202531646	0.546	0.0990296720727571
615	615	hsa:55914	6	1436	-0.0401535466545139	0.033	206.973855890945	0.654	0.104368299811266
616	616	hsa:2065	3	994	-0.0360812782886074	0.097	138.589143135346	0.215	0.101567219153054
617	617	hsa:2066	3	1000	-0.0530300123130043	0.02	132.435929892892	0.898	0.0901521635613012
618	618	hsa:2081	1	4	NA	1	0.980160662122688	0.041	0.171961511703391
619	619	hsa:90952	2	14	-0.453920649501602	0.018	3.10778967867575	0.032	0.00487261606882659
620	620	hsa:9700	4	400	0.0832152976922164	0.971	66.8335443037975	0.01	0.0547119562577522
621	621	hsa:23474	4	332	-0.0713432645528296	0.048	41.2186465433301	0.196	0.0533075615046658
622	622	hsa:55500	21	1959	-0.023035846220269	0.118	224.614629990263	0.481	0.219594355816851
623	623	hsa:55224	20	1957	-0.0218327106767253	0.133	310.370959104187	0.529	0.25709664961214
624	624	hsa:2113	4	1446	-0.055684934045826	0.004	202.307814021422	0.028	0.00113086530890695
625	625	hsa:2120	5	1670	-0.0381886873202676	0.04	272.525511197663	0.324	0.0692827031412318
626	626	hsa:2146	5	1197	-0.0575803635936151	0.007	201.13176728335	0.882	0.037583659170818
627	627	hsa:50848	5	1701	-0.0310510305968516	0.079	197.491966893866	0.325	0.119702948407326
628	628	hsa:2147	20	1957	-0.00715507111361683	0.392	248.593111002921	0.473	0.497870389776295
629	629	hsa:2149	3	787	-0.00399292225868154	0.439	129.887658227848	0.077	0.148300715055766
630	630	hsa:2157	14	1931	-0.0110864555714916	0.331	195.400730282376	0.376	0.383797791046341
631	631	hsa:2168	6	1744	-0.000458400038729129	0.51	241.615335929893	0.205	0.340633294142388
632	632	hsa:8772	19	1957	-0.0350167787944703	0.041	243.710686465433	0.469	0.0952092346139844
633	633	hsa:9415	3	523	0.0206025676640497	0.727	82.6663583252191	0.14	0.334341361933067
634	634	hsa:2184	6	130	-0.149707790188656	0.007	18.2961538461538	0.443	0.0210124710111167
635	635	hsa:2177	4	188	-0.115030576916877	0.035	36.4999513145083	0.151	0.0329936348563028
636	636	hsa:2189	3	58	-0.209275383037426	0.021	7.98247322297955	0.535	0.0616657846295294
637	637	hsa:55120	4	70	-0.23871554806031	0.006	8.97680136319377	0.371	0.0158214041321627
638	638	hsa:9855	20	1959	-0.0253189128061449	0.128	356.718597857838	0.51	0.24343366142034
639	639	hsa:2194	1	2	NA	1	0.479016553067186	0.088	0.301876824876346
640	640	hsa:2091	7	30	0.187355099407651	0.911	4.82631450827653	0.024	0.105448187986912
641	641	hsa:2203	5	1657	-0.0139943474531818	0.26	220.101436222006	0.24	0.235509456225062
642	642	hsa:26224	2	9	-0.353553390593274	0.208	1.6879746835443	0.244	0.202033777446721
643	643	hsa:26260	17	1957	-0.02028974169393	0.136	208.906523855891	0.441	0.22873711634776
644	644	hsa:114907	4	1137	-0.00940719099257535	0.333	150.375632911392	0.002	0.00553727111102431
645	645	hsa:26271	2	39	0.0372570207962461	0.598	8.13739045764362	0.055	0.145195753891713
646	646	hsa:26270	21	1963	-0.0317515802473267	0.034	230.006304771178	0.506	0.0870972003152994
647	647	hsa:2207	4	1358	-0.05096322845119	0.022	197.681110029211	0.016	0.00315106154259289
648	648	hsa:2208	20	1959	-0.0195219107541156	0.155	280.289045764362	0.477	0.266503805329835
649	649	hsa:2222	7	242	-0.0329525568420662	0.244	30.6896786757546	0.004	0.00774167882023396
650	650	hsa:2235	10	90	-0.0483015829746197	0.286	15.7074732229796	0.014	0.0261079275157868
651	651	hsa:2241	12	1917	-0.00493794318672325	0.431	195.403578383642	0.447	0.509933000088139
652	652	hsa:2243	4	1003	-0.0401473261036684	0.104	180.632156767283	0.452	0.190732021012393
653	653	hsa:2245	2	67	-0.115182456744181	0.173	13.5497809152872	0.002	0.00310329883688567
654	654	hsa:89846	2	67	-0.109946890528537	0.193	12.1226387536514	0.044	0.0489872122028185
655	655	hsa:2256	2	112	-0.111494921988122	0.102	14.6311343719572	0.112	0.0625125720895492
656	656	hsa:2257	4	1272	-0.0355193348065247	0.067	154.915311587147	0.08	0.0333863213889009
657	657	hsa:2258	2	112	-0.111494921988122	0.099	19.738558909445	0.11	0.0601118236247859
658	658	hsa:8822	2	112	-0.109211749524201	0.103	20.1291139240506	0.372	0.163298489705622
659	659	hsa:8817	4	1272	-0.0346992448004553	0.076	182.116772151899	0.069	0.0327785172193951
660	660	hsa:9965	4	1272	-0.0340125821366433	0.077	159.364216163583	0.507	0.165650055739425
661	661	hsa:2247	2	112	-0.111494921988122	0.097	28.0733690360273	0.004	0.00343554802471631
662	662	hsa:2260	3	999	-0.0561516833180686	0.008	138.505379746835	0.014	0.00113086530890695
663	663	hsa:2261	3	923	-0.0362982827797702	0.077	176.700438169426	0.365	0.128490657727952
664	664	hsa:2264	4	1374	-0.0420135736250607	0.037	183.407911392405	0.202	0.0440691326607454
665	665	hsa:2266	4	1003	-0.0426266793871244	0.086	133.966480038948	0.254	0.105371720560057
666	666	hsa:2274	3	429	0.0381492588685926	0.85	56.0988802336904	0.002	0.012541115947464
667	667	hsa:2277	2	230	-0.128682315195897	0.012	29.1046251217137	0.334	0.0261300073641199
668	668	hsa:81608	11	97	-0.0254424126655925	0.358	16.3469814995131	0.105	0.160923437352653
669	669	hsa:2316	2	179	0.0374410650373934	0.701	30.8977604673807	0.000999000999000999	0.00578727824381139
670	670	hsa:2317	2	179	0.0407624498390976	0.715	22.3187195715677	0.021	0.0780585642468658
671	671	hsa:2318	4	1391	-0.0179097782258349	0.232	208.939070107108	0.27	0.236174800878046
672	672	hsa:10211	3	66	0.0073837567395653	0.495	9.85245861733204	0.319	0.449360000071699
673	673	hsa:2319	4	376	-0.00461342920663767	0.438	49.2423563777994	0.177	0.275770984103375
674	674	hsa:2330	4	627	-0.0285023362757596	0.205	116.049318403116	0.309	0.238123945980637
675	675	hsa:2332	20	1957	-0.0133936879589397	0.274	240.834493670886	0.517	0.418505835808267
676	676	hsa:2335	2	114	0.043264544454326	0.672	22.3722736124635	0.000999000999000999	0.00557622492941486
677	677	hsa:2342	5	1202	-0.0445450118182281	0.025	150.925778967868	0.683	0.0865726383404442
678	678	hsa:2353	4	1587	-0.0399303234739821	0.032	212.734931840312	0.263	0.0486244551630568
679	679	hsa:2354	4	1469	-0.0552328117989426	0.006	195.314605647517	0.329	0.0142674666491545
680	680	hsa:2355	4	1292	-0.0325409167653823	0.091	207.17782375852	0.088	0.0466651324096495
681	681	hsa:3170	3	122	-0.122716975973555	0.064	23.5296007789679	0.055	0.0234055158985899
682	682	hsa:3171	4	78	-0.0448137337290444	0.344	12.6291869522882	0.491	0.469287057824396
683	683	hsa:27086	5	1066	-0.052906509253039	0.014	180.24759006816	0.331	0.029538667708672
684	684	hsa:2356	1	1	NA	1	0.348709834469328	0.009	0.0513947763148133
685	685	hsa:8790	9	1485	-0.00644293542446377	0.39	228.093670886076	0.261	0.334364210858406
686	686	hsa:2492	2	34	0.0527750413650936	0.667	7.07865141187926	0.026	0.0876572889575792
687	687	hsa:10468	1	1	NA	1	0.248271665043817	0.06	0.228804643005602
688	688	hsa:10841	4	300	-0.0441327078584569	0.15	34.535735150925	0.487	0.264193443834376
689	689	hsa:197258	10	1485	-0.0056671350057248	0.406	197.276265822785	0.234	0.318627862230592
690	690	hsa:2524	3	46	-0.140061640685837	0.111	4.859858812074	0.74	0.287434980201069
691	691	hsa:2526	4	164	0.00600806720275944	0.533	32.1775803310613	0.178	0.318321774529581
692	692	hsa:2530	1	6	NA	1	0.908154819863681	0.183	0.493783250083751
693	693	hsa:8087	5	1114	-0.00649443286051253	0.413	182.599853943525	0.189	0.277127012104748
694	694	hsa:486	4	1502	-0.0256722981251446	0.12	202.713485881207	0.412	0.198105855830769
695	695	hsa:53828	3	74	0.0569758548405608	0.728	12.5876095423564	0.000999000999000999	0.0059826974618914
696	696	hsa:2534	3	870	-0.0471414739066386	0.044	146.942307692308	0.4	0.0887014722341094
697	697	hsa:8321	12	1924	-0.00501958551670705	0.415	161.182935735151	0.464	0.50977323180929
698	698	hsa:2535	20	1959	-0.00496227637022486	0.422	332.168914313535	0.487	0.530686701709478
699	699	hsa:8322	1	20	NA	1	2.93089094449854	0.007	0.0417329159094878
700	700	hsa:7855	2	195	0.058501871252078	0.82	39.4793086660175	0.009	0.0436082845059288
701	701	hsa:8323	10	1900	-0.0017153739725576	0.485	251.611514118793	0.37	0.48771973678617
702	702	hsa:8324	2	195	0.060222514524198	0.824	30.4625608568647	0.238	0.515592049226823
703	703	hsa:51343	3	146	-0.0964213939180177	0.085	16.4711781888997	0.414	0.152970695199956
704	704	hsa:57818	4	1269	-0.0129959364065319	0.28	149.339581304771	0.687	0.50944365841248
705	705	hsa:92579	4	1269	-0.0119386630077588	0.296	140.607035053554	0.668	0.518217985443518
706	706	hsa:2539	4	328	-0.0276627740712342	0.261	32.9374634858812	0.502	0.397309806635112
707	707	hsa:2549	4	1325	-0.0500691732681355	0.02	177.466991236612	0.492	0.0553135877483129
708	708	hsa:9846	4	1419	-0.0363485682438319	0.047	240.912390457644	0.88	0.173109841777622
709	709	hsa:2554	1	1	NA	1	0.390603700097371	0.009	0.0513947763148133
710	710	hsa:2561	6	1612	-0.0200139069034736	0.182	262.296786757546	0.292	0.209108357646699
711	711	hsa:2562	6	1612	-0.0181853213423942	0.199	221.309664070107	0.29	0.222317664800062
712	712	hsa:2565	6	1612	-0.0194467418798608	0.184	186.061781888997	0.232	0.177319012155875
713	713	hsa:55879	6	1612	-0.0187543832389957	0.196	260.210662122687	0.358	0.256594756832586
714	714	hsa:2571	2	60	-0.209960687439175	0.028	6.16842745861733	0.312	0.0501472857847817
715	715	hsa:2572	2	60	-0.209960687439175	0.03	7.68960564751704	0.754	0.108325388683614
716	716	hsa:4616	2	171	-0.0326886187390655	0.275	24.1522638753651	0.014	0.0252547762031274
717	717	hsa:9514	3	61	0.114980512454568	0.88	10.6465189873418	0.056	0.197624477376819
718	718	hsa:2582	3	139	-0.0624431689020423	0.153	17.4898734177215	0.441	0.249382081126387
719	719	hsa:2584	3	128	-0.0322399339726828	0.327	22.2353456669912	0.645	0.53916202932126
720	720	hsa:2585	1	2	NA	1	0.414167478091529	0.047	0.190707560831788
721	721	hsa:130589	2	68	-0.124321394736977	0.116	11.2222249269718	0.157	0.0911633451142129
722	722	hsa:2588	6	1634	-0.000668255384424249	0.518	184.821299902629	0.479	0.593963057972513
723	723	hsa:2589	4	31	0.0206247683754839	0.537	4.01450827653359	0.245	0.398412270784194
724	724	hsa:114805	6	381	0.00951373497376202	0.59	55.756864654333	0.154	0.308781842138619
725	725	hsa:2590	2	5	0	0.593	1.22324732229796	0.002	0.00917628240839023
726	726	hsa:51809	1	1	NA	1	0.445569620253165	0.03	0.135196736919599
727	727	hsa:2592	2	80	-0.055594665419995	0.261	10.4647273612464	0.725	0.504250279865277
728	728	hsa:2593	3	45	-0.240037174449803	0.027	4.59121226874391	0.745	0.0986900127610694
729	729	hsa:23193	5	22	-0.418593479910653	0.008	4.06803797468354	0.069	0.00469308330645133
730	730	hsa:2618	3	166	-0.0488576683197936	0.223	23.1436222005842	0.017	0.0249263005523201
731	731	hsa:2625	5	1564	-0.0429042820501728	0.019	244.400973709834	0.136	0.0179805487348716
732	732	hsa:2629	2	43	-0.0674013181063439	0.311	7.95701071080818	0.507	0.448939001721201
733	733	hsa:57704	2	43	-0.0425692535408488	0.377	7.10194741966894	0.209	0.279000585624025
734	734	hsa:2632	2	19	-0.315919401471516	0.057	1.91039435248296	0.466	0.12293620485078
735	735	hsa:26301	3	43	-0.0315151001186665	0.39	6.93953261927946	0.053	0.100850416282312
736	736	hsa:2639	3	119	-0.231214510153796	0.003	14.8876582278481	0.772	0.0163692881738325
737	737	hsa:2643	7	310	-0.0578857890508411	0.092	32.9953505355404	0.936	0.297267795310134
738	738	hsa:2730	6	906	-0.018719074761929	0.242	106.635662122687	0.522	0.387676386033575
739	739	hsa:9615	3	138	-0.0390146476877238	0.28	16.6804771178189	0.254	0.259117661234664
740	740	hsa:151449	20	1957	-0.0129387882067215	0.27	269.326752677702	0.488	0.398807635924536
741	741	hsa:2673	2	48	-0.233022843064947	0.028	7.22310126582278	0.832	0.110876697147923
742	742	hsa:9945	2	48	-0.236351740823018	0.027	10.0093962999026	0.672	0.0908908321364692
743	743	hsa:8836	4	151	-0.000137022979017278	0.491	30.961441090555	0.034	0.0850176323873117
744	744	hsa:28964	22	1963	-0.0251521189791887	0.124	251.565944498539	0.488	0.230242930946657
745	745	hsa:2717	4	536	0.000203028143597239	0.509	56.5021421616358	0.516	0.613787412813934
746	746	hsa:2720	2	92	-0.0195559019655949	0.431	12.6602482960078	0.756	0.691215812668968
747	747	hsa:2734	4	250	-0.000384004785528177	0.485	36.6997322297955	0.025	0.0656263908361729
748	748	hsa:2739	4	320	-0.0296100990610159	0.266	57.1827896786758	0.001	0.00245571579028257
749	749	hsa:2744	5	1580	-0.0167151336333335	0.207	177.989094449854	0.424	0.301312661705295
750	750	hsa:2752	6	1671	-0.00296964464218486	0.443	222.402312560857	0.486	0.545938063448886
751	751	hsa:2762	5	204	-0.00435682609798208	0.483	35.4214216163583	0.023	0.0610994965382418
752	752	hsa:2766	2	102	-0.068580098755849	0.226	17.0960564751704	0.386	0.30001665907542
753	753	hsa:51292	2	102	-0.068580098755849	0.226	17.1908958130477	0.307	0.254502043790073
754	754	hsa:2768	1	12	NA	1	2.66078383641675	0.049	0.196780814062704
755	755	hsa:10672	1	13	NA	1	2.48249756572541	0.047	0.190707560831788
756	756	hsa:2769	12	1919	-0.0135330908930014	0.277	263.117770204479	0.348	0.321894253978749
757	757	hsa:2771	4	1605	-0.0344092260078352	0.044	242.964532619279	0.176	0.0453863211782369
758	758	hsa:2773	1	57	NA	1	12.5016309639727	0.012	0.0650741835503296
759	759	hsa:2778	1	33	NA	1	4.81845180136319	0.112	0.357196717660949
760	760	hsa:2781	19	1957	-0.0192751464316234	0.168	432.605696202532	0.555	0.314459216059312
761	761	hsa:2782	18	1957	-0.0209765522097328	0.145	224.071811100292	0.475	0.253147446042686
762	762	hsa:2783	11	1924	-0.0204033896837948	0.145	274.399221032132	0.506	0.26503005953082
763	763	hsa:2784	19	1959	-0.021082077161791	0.147	234.281134371957	0.458	0.248985604798366
764	764	hsa:59345	1	36	NA	1	8.51643135345667	0.065	0.242668920590623
765	765	hsa:10681	4	1580	-0.0195463109460681	0.163	169.719328140214	0.298	0.195494168575055
766	766	hsa:2791	3	1174	0.00970464239373156	0.646	163.10111976631	0.016	0.0575934564229514
767	767	hsa:55970	20	1963	-0.0181954789277323	0.181	238.909980525803	0.494	0.305302136742374
768	768	hsa:2785	1	36	NA	1	7.95177702044791	0.003	0.0204274289709421
769	769	hsa:2788	1	36	NA	1	6.14057935735151	0.073	0.264062596161864
770	770	hsa:8443	2	3	-0.816496580927726	0.351	0.776996105160662	0.049	0.0870768865218335
771	771	hsa:10007	3	211	-0.0111640911690572	0.458	35.2478091528724	0.131	0.228799016150835
772	772	hsa:132789	2	35	-0.147281623941007	0.147	5.20068159688413	0.423	0.234901523861011
773	773	hsa:64841	3	215	-0.0853141172812665	0.074	45.4527750730282	0.306	0.108416310055418
774	774	hsa:2799	1	5	NA	1	1.3519717624148	0.003	0.0204274289709421
775	775	hsa:2805	2	97	-0.109212006271565	0.074	13.282035053554	0.282	0.101617527202277
776	776	hsa:51206	2	69	-0.416656978884509	0.002	8.15873904576436	0.688	0.0104418785663121
777	777	hsa:8733	8	26	0.121081102919336	0.79	5.56095423563778	0.000999000999000999	0.00642770920993075
778	778	hsa:57678	2	37	0.13069658651533	0.831	7.33729308666018	0.07	0.223627905760029
779	779	hsa:2817	3	174	-0.0247899573986385	0.365	27.6060613437196	0.116	0.176220054382081
780	780	hsa:2719	3	143	0.0810504631292392	0.867	21.6686465433301	0.009	0.0456728863710221
781	781	hsa:23171	4	204	-0.0285645210573681	0.273	33.9765579357352	0.025	0.0408623870512434
782	782	hsa:2820	4	204	-0.0142437638695771	0.371	35.5596640701071	0.495	0.49487749832288
783	783	hsa:2821	3	328	-0.0267437910749188	0.264	46.487852969815	0.028	0.0436671825347993
784	784	hsa:2822	12	42	-0.063171423101152	0.268	5.87042356377799	0.236	0.237856233222514
785	785	hsa:139760	2	33	-0.0923186182344995	0.349	6.8083982473223	0.003	0.00823133218540715
786	786	hsa:2877	2	38	-0.228037964062883	0.061	6.16674780915287	0.496	0.13609332656835
787	787	hsa:2878	2	38	-0.202932867101832	0.088	3.53230282375852	0.603	0.208873517397213
788	788	hsa:2879	2	29	-0.260997356009132	0.066	4.13322784810127	0.027	0.0130620937687815
789	789	hsa:2885	18	1957	-0.0393563850882786	0.034	318.861051606621	0.524	0.0895727611462662
790	790	hsa:9380	3	94	-0.132961824986636	0.066	15.8414313534567	0.157	0.0577122989297288
791	791	hsa:2904	2	226	-0.0550657833422256	0.157	25.488023369036	0.321	0.200974347455203
792	792	hsa:2905	2	195	-0.100076629376146	0.048	32.6073271665044	0.748	0.155353253456317
793	793	hsa:2911	2	163	-0.00102210305195359	0.54	32.3200097370983	0.005	0.018669159466124
794	794	hsa:2912	21	1963	-0.0108205751866599	0.307	243.615774099318	0.512	0.448027557324101
795	795	hsa:2925	3	221	-0.0141858454349596	0.375	27.9079600778968	0.19	0.259461182763128
796	796	hsa:2931	3	522	0.001411613559707	0.532	69.596129503408	0.065	0.150923711439979
797	797	hsa:2934	4	923	-0.0159781409548258	0.285	158.05676728335	0.278	0.280109762917115
798	798	hsa:2935	4	76	-0.0617747100205367	0.247	8.84496105160662	0.273	0.249268834885811
799	799	hsa:2936	2	29	-0.225727443034925	0.088	3.70876338851022	0.398	0.152414702158774
800	800	hsa:2937	2	34	-0.164197394357296	0.152	3.36623661148978	0.956	0.425600266092365
801	801	hsa:2941	2	64	0.0601972957895454	0.715	11.0033836416748	0.037	0.122547763764972
802	802	hsa:2946	2	64	0.0659994447813088	0.744	9.28768257059396	0.127	0.31741187887632
803	803	hsa:2947	1	23	NA	1	3.95150925024343	0.000999000999000999	0.00790085392538984
804	804	hsa:2948	3	177	0.0257882064929892	0.684	26.2206913339825	0.015	0.0572456950265974
805	805	hsa:119391	4	738	-0.0130907789575531	0.347	107.21482473223	0.735	0.603516880282714
806	806	hsa:2950	4	738	-0.0110084209106859	0.371	90.5504381694255	0.116	0.178415132941723
807	807	hsa:2952	2	64	0.0703510565251313	0.751	9.89992697176242	0.171	0.3919975705695
808	808	hsa:2954	5	130	-0.176302129640239	0.004	19.6161635832522	0.79	0.0213526990743713
809	809	hsa:23560	3	5	-0.836660026534076	0.055	0.817380720545278	0.327	0.0902526363749944
810	810	hsa:51512	19	1957	-0.0273180329539554	0.076	285.747638753651	0.483	0.158019150784243
811	811	hsa:2979	7	1818	0.0063207889672907	0.639	225.124464459591	0.268	0.473446554064991
812	812	hsa:2977	5	1651	-0.0111958611948236	0.286	248.516626095424	0.245	0.256334315799541
813	813	hsa:2982	5	1651	-0.00913730489551159	0.323	264.975851996105	0.188	0.230837201695564
814	814	hsa:3000	1	40	NA	1	6.58286270691334	0.003	0.0204274289709421
815	815	hsa:2987	1	22	NA	1	4.43666017526777	0.068	0.25080083501881
816	816	hsa:2990	4	417	-0.101353594853944	0.009	74.1412122687439	0.401	0.0239071873129373
817	817	hsa:2997	1	10	NA	1	2.03198636806232	0.031	0.138686810309407
818	818	hsa:3002	4	959	0.0121476505769161	0.639	135.541674780915	0.054	0.150674660699617
819	819	hsa:9555	3	119	-0.0264827307918392	0.364	19.3748782862707	0.182	0.246068259015355
820	820	hsa:55506	4	737	0.0372131646549457	0.877	90.3641674780915	0.079	0.254237828472444
821	821	hsa:23498	6	1658	-0.0394352293070592	0.028	191.146908471276	0.461	0.0690566125258606
822	822	hsa:3029	1	1	NA	1	0.297444011684518	0.034	0.148967421648443
823	823	hsa:54363	6	1676	-0.0190648737500473	0.168	262.610199610516	0.211	0.153833276001371
824	824	hsa:51179	6	1676	-0.0196391327075905	0.162	283.91100292113	0.393	0.23900882415518
825	825	hsa:3054	2	35	0.051541696611225	0.647	8.22093476144109	0.006	0.0254325534112215
826	826	hsa:29915	3	213	0.016030050447499	0.586	39.5696445959104	0.013	0.0447728250684322
827	827	hsa:3059	4	1128	-0.0421116643851798	0.068	114.454162609542	0.068	0.0294849135625582
828	828	hsa:10870	3	743	-0.0414042942256357	0.087	110.406864654333	0.042	0.0241600025280302
829	829	hsa:3065	2	117	-0.00301975976365365	0.5	13.0715676728335	0.1	0.1997866136777
830	830	hsa:83933	21	1957	-0.0157166752136689	0.197	354.041285296982	0.489	0.321746858081273
831	831	hsa:79885	14	1925	-0.0174596570992343	0.182	295.534810126582	0.504	0.310859551151116
832	832	hsa:3066	1	14	NA	1	3.13327653359299	0.008	0.0466265098984184
833	833	hsa:10014	3	22	0.0936281675898539	0.721	4.11811100292113	0.114	0.287569926283979
834	834	hsa:10013	23	1963	-0.01670091464083	0.188	229.619985394353	0.465	0.300465266590196
835	835	hsa:55869	14	1925	-0.0179767212316484	0.179	241.545959104187	0.483	0.298113081869503
836	836	hsa:3067	5	610	-0.0327894375938508	0.155	92.8491723466407	0.78	0.376336494932592
837	837	hsa:51409	6	1628	-0.0092817226139617	0.305	194.190043816943	0.349	0.344895303522694
838	838	hsa:9709	5	64	-0.128000962353238	0.096	11.511100292113	0.012	0.00894672658564812
839	839	hsa:3280	19	1957	-0.0248969056192007	0.095	317.745861733204	0.465	0.181983164819796
840	840	hsa:3073	3	103	0.066790115569653	0.81	18.7351752677702	0.012	0.0547582971001551
841	841	hsa:3074	2	38	-0.0389526222540239	0.385	6.3286270691334	0.018	0.0413852355778577
842	842	hsa:64399	2	29	-0.134865517623595	0.194	3.76738072054528	0.925	0.48771973678617
843	843	hsa:11112	2	45	-0.378134115958976	0.000999000999000999	4.41453261927945	0.852	0.00686785499381696
844	844	hsa:3091	4	1608	-0.0283852247680951	0.092	261.64547224927	0.497	0.186788573502126
845	845	hsa:3092	4	287	-0.00605438080137466	0.441	42.8721032132425	0.334	0.429409834821212
846	846	hsa:221613	2	22	-0.0192628532132355	0.462	5.10306718597858	0.018	0.0481460966271307
847	847	hsa:8334	2	22	-0.0064209510710785	0.517	3.89741966893866	0.126	0.243056903853048
848	848	hsa:85235	20	1957	-0.0168197402748373	0.183	296.579892891918	0.491	0.306361016658783
849	849	hsa:8345	3	119	-0.0249694318894484	0.372	21.5440360272639	0.176	0.243957360700928
850	850	hsa:8341	2	22	-0.0064209510710785	0.497	2.78478578383642	0.131	0.242961302946649
851	851	hsa:317772	20	1957	-0.016414691505892	0.184	328.58770691334	0.515	0.318053212574772
852	852	hsa:3098	4	1483	-0.00591396592691174	0.406	233.679211295034	0.606	0.591046725410976
853	853	hsa:3101	4	1483	-0.00584872122795448	0.4	233.22076436222	0.443	0.483840389871737
854	854	hsa:3106	3	60	-0.117810965203993	0.214	12.0750730282376	0.000999000999000999	0.00202039389136959
855	855	hsa:3107	3	60	-0.122669149336117	0.205	12.3731256085686	0.000999000999000999	0.00194422329293465
856	856	hsa:3108	1	10	NA	1	2.91976630963973	0.000999000999000999	0.00790085392538984
857	857	hsa:3113	2	35	-0.101839717293337	0.319	7.3743670886076	0.002	0.00533187591120724
858	858	hsa:3125	1	9	NA	1	2.61536027263875	0.000999000999000999	0.00790085392538984
859	859	hsa:3127	2	35	-0.101839717293337	0.285	7.5033106134372	0.001	0.00261146109264326
860	860	hsa:3135	3	60	-0.163963714459166	0.144	10.3475170399221	0.000999000999000999	0.00141650782543045
861	861	hsa:3145	4	29	-0.0613698416230541	0.35	4.75038948393379	0.111	0.165036633804245
862	862	hsa:3155	2	24	-0.104986287288808	0.31	5.18244888023369	0.000999000999000999	0.00281196873711652
863	863	hsa:3156	4	265	-0.00914625630454477	0.419	31.2149221032132	0.003	0.00965253737816315
864	864	hsa:3157	3	119	-0.147328321339532	0.024	20.0116358325219	0.24	0.0354632705526202
865	865	hsa:3162	2	85	-0.164018172116122	0.037	11.9051363193768	0.721	0.123353207733852
866	866	hsa:3163	4	238	-0.0738769849574575	0.086	30.0733690360273	0.092	0.0462011325050436
867	867	hsa:3174	3	3	0	0.642	0.716626095423564	0.081	0.205744514125497
868	868	hsa:3176	4	441	-0.0429498355471005	0.128	64.7090068159688	0.754	0.322165541917654
869	869	hsa:9455	4	1334	-0.0352986192823332	0.077	160.494036027264	0.29	0.107224734679194
870	870	hsa:9454	3	712	-0.048412585418741	0.054	81.0770934761441	0.039	0.0150852040062594
871	871	hsa:3242	3	130	-0.160179581735303	0.003	15.037682570594	0.624	0.0136295600705348
872	872	hsa:3265	3	1192	-0.0408585119244655	0.04	140.580720545278	0.233	0.0528965235006528
873	873	hsa:3295	3	53	-0.0670417216624577	0.264	8.93634371957157	0.031	0.0475128196647237
874	874	hsa:7923	3	202	-0.131687521725805	0.015	24.1019717624148	0.643	0.0544104892766628
875	875	hsa:80270	2	15	-0.0521640530957301	0.435	2.07969814995131	0.218	0.318218135279323
876	876	hsa:3306	19	1959	-0.0275470700778582	0.08	337.956962025316	0.489	0.165912670490863
877	877	hsa:3315	12	1926	-0.0293113668173928	0.076	289.722078870497	0.488	0.159272999676958
878	878	hsa:3339	3	559	-0.0647189732925456	0.095	72.4203261927945	0.001	0.000974855198304556
879	879	hsa:3351	2	74	0.0431244036304424	0.689	14.0579357351509	0.019	0.0698513545592027
880	880	hsa:3358	3	367	0.00373362608969071	0.539	58.0078383641675	0.149	0.282843189428611
881	881	hsa:3360	2	54	-0.112565146823135	0.239	13.1879016553067	0.000999000999000999	0.00223004107394749
882	882	hsa:3362	2	54	-0.112565146823135	0.24	8.35910418695229	0.001	0.00224036919230935
883	883	hsa:8692	5	62	0.145131804708205	0.905	11.3163583252191	0.001	0.00724685593090924
884	884	hsa:10525	2	7	-0.629940788348712	0.052	0.830160662122688	0.411	0.103561736711077
885	885	hsa:3381	4	1181	-0.0485205986345272	0.042	153.107935735151	0.1	0.0271852171655098
886	886	hsa:3383	3	794	-0.0268698204931694	0.193	131.168670886076	0.002	0.00341983385076079
887	887	hsa:3384	2	24	-0.344828154104298	0.028	3.80092502434275	0.017	0.00411744412697684
888	888	hsa:3385	2	23	-0.294883912309794	0.042	4.22804284323272	0.003	0.00125738281002761
889	889	hsa:23463	7	1202	-0.0439078960279092	0.026	171.306231742941	0.918	0.113020150508665
890	890	hsa:3397	3	662	-0.00726945515579758	0.43	109.378481012658	0.029	0.0671438361055487
891	891	hsa:3399	5	1501	-0.0133040988527836	0.261	175.194206426485	0.106	0.126919187529946
892	892	hsa:3417	4	93	-0.0410658283434109	0.3	17.9868792599805	0.000999000999000999	0.00273108718790444
893	893	hsa:3420	2	8	-0.7319250547114	0.027	1.22999026290166	0.323	0.0500761683567579
894	894	hsa:3421	2	8	-0.7319250547114	0.029	1.15360272638754	0.071	0.0147950162580782
895	895	hsa:91734	3	75	-0.000814645366086895	0.476	14.0263631937683	0.01	0.0302141362271167
896	896	hsa:3423	4	242	-0.0770214636124173	0.117	29.3527750730282	0.448	0.206966850369632
897	897	hsa:3425	5	242	-0.0754988063874228	0.126	36.6892161635833	0.244	0.137796465728323
898	898	hsa:3448	5	1587	-0.071673099991534	0.001	203.063851022395	0.283	0.00259512801587086
899	899	hsa:3454	4	1397	-0.058089990151938	0.005	191.666553067186	0.418	0.0149865356351813
900	900	hsa:3455	4	1397	-0.0593864030627906	0.005	150.812731256086	0.07	0.00313515209121829
901	901	hsa:3459	4	1442	-0.0490354705039332	0.013	237.349123661149	0.408	0.0330932155144268
902	902	hsa:3460	4	1442	-0.0508086517479253	0.009	156.952653359299	0.081	0.00599517704612165
903	903	hsa:3480	20	1963	-0.0193605609746493	0.183	325.287755598832	0.495	0.308121855815769
904	904	hsa:3481	19	1957	-0.0142549967702052	0.254	219.514532619279	0.518	0.398426468377748
905	905	hsa:3486	10	1900	-0.0332804308463368	0.039	227.723831548199	0.311	0.0656440401198203
906	906	hsa:3549	3	39	-0.278494275031145	0.023	4.93449367088608	0.041	0.00751235695163696
907	907	hsa:3551	19	1963	-0.0407340951074436	0.019	222.193695228822	0.481	0.0520484721771369
908	908	hsa:9641	5	1458	-0.0527300630727561	0.012	184.449853943525	0.356	0.0275786358135292
909	909	hsa:8517	4	1413	-0.0373048417768764	0.043	212.578383641675	0.325	0.0736550315076751
910	910	hsa:3588	4	1310	-0.05657738424467	0.011	214.155331061344	0.378	0.0269551542903336
911	911	hsa:3590	4	1310	-0.0569809363156736	0.01	145.885053554041	0.182	0.0133022321757661
912	912	hsa:3592	4	1473	-0.0553671852019058	0.006	216.085126582278	0.528	0.0213987464223349
913	913	hsa:3594	4	1398	-0.0656184971096395	0.001	193.949951314508	0.469	0.00406384175328394
914	914	hsa:3597	4	1310	-0.0546920875465464	0.011	158.896786757546	0.622	0.0409471476665837
915	915	hsa:3600	5	1570	-0.0701286888289869	0.000999000999000999	230.821908471276	0.598	0.00503187387012922
916	916	hsa:3601	4	1310	-0.0546150737925381	0.012	206.910832521908	0.046	0.00469308330645133
917	917	hsa:3606	4	1404	-0.0439210420079233	0.026	227.67952775073	0.646	0.0854347774134266
918	918	hsa:29949	5	1570	-0.0692947325603174	0.000999000999000999	205.589776046738	0.494	0.00425105237093712
919	919	hsa:3554	4	1316	-0.0382481793436243	0.048	163.126630963973	0.29	0.073420046447136
920	920	hsa:50604	5	1570	-0.0693349232238677	0.000999000999000999	237.960783836417	0.458	0.00397587964073516
921	921	hsa:58985	4	1310	-0.0551110423683516	0.012	179.389216163583	0.307	0.0243282376956102
922	922	hsa:3561	3	802	-0.0551510049908704	0.031	124.502896786758	0.000999000999000999	0.000352505702765413
923	923	hsa:3566	4	1316	-0.0620353279518947	0.003	184.470934761441	0.338	0.00800436630704654
924	924	hsa:3568	4	1310	-0.0549970620124193	0.011	174.045107108082	0.69	0.0446362107886912
925	925	hsa:3570	4	1398	-0.0659287293197375	0.001	241.236222005842	0.446	0.00388697545625112
926	926	hsa:3572	3	625	-0.013759906481929	0.328	98.4428432327167	0.001	0.00295937899946229
927	927	hsa:3611	4	1523	-0.0282971535172899	0.116	220.959079844206	0.137	0.0817157015968453
928	928	hsa:3612	2	101	-0.129105002198861	0.081	18.7814021421616	0.213	0.0872961986560093
929	929	hsa:3613	22	1963	-0.0236500177069971	0.145	356.508106134372	0.485	0.257011708797932
930	930	hsa:3615	4	631	-0.0215202960347437	0.266	88.4025073028238	0.197	0.206925568892337
931	931	hsa:3624	5	1425	0.000833383028179709	0.509	300.725778967868	0.291	0.430987671561489
932	932	hsa:3628	2	100	-0.133098657500477	0.066	15.2564264849075	0.255	0.0855736879172177
933	933	hsa:3631	4	1329	-0.071406000878271	0.004	198.88700097371	0.076	0.00276593878839365
934	934	hsa:8821	3	685	-0.0612806994970228	0.025	113.367964946446	0.092	0.0162721461589082
935	935	hsa:3632	13	1927	-0.0233155695567689	0.141	274.388948393379	0.394	0.216127268171941
936	936	hsa:56623	3	787	-0.0659666641316089	0.013	101.434128529698	0.732	0.0538108930131282
937	937	hsa:3636	4	1308	-0.070110886583474	0.005	132.117259006816	0.228	0.00886546879889634
938	938	hsa:8826	2	285	0.000242988470099478	0.497	53.5832521908471	0.061	0.136306646824489
939	939	hsa:10788	2	75	-0.136913885631609	0.09	11.1245861733204	0.147	0.0704532996203153
940	940	hsa:3656	3	596	0.0151120889208092	0.674	66.5921372930867	0.001	0.00559573702131303
941	941	hsa:3659	2	102	-0.0999574413549267	0.113	15.608106134372	0.000999000999000999	0.00113893188119192
942	942	hsa:3661	5	1610	-0.0382586137671864	0.031	199.168037974684	0.464	0.0753957325172213
943	943	hsa:3665	3	580	-0.0256658214067589	0.241	75.3292843232717	0.022	0.0330827365492534
944	944	hsa:3667	18	1957	-0.025683966697838	0.1	355.942356377799	0.526	0.207509059775944
945	945	hsa:8660	4	1486	-0.0319350779802246	0.084	171.028724440117	0.118	0.0556460585427033
946	946	hsa:8471	5	1718	-0.027401697380487	0.113	201.444084712756	0.223	0.117955283437386
947	947	hsa:83737	4	1370	-0.040902603785448	0.037	168.667112950341	0.43	0.0817902463168222
948	948	hsa:8515	3	745	-0.0537291291150806	0.086	112.839678675755	0.014	0.00929741554224299
949	949	hsa:3673	2	323	-0.0623263529039707	0.13	49.6585443037975	0.071	0.0524752842072139
950	950	hsa:3674	1	43	NA	1	6.18697663096397	0.023	0.109762004450219
951	951	hsa:3675	2	175	-0.0921999630221886	0.106	25.4900681596884	0.004	0.00371668949155851
952	952	hsa:3678	3	805	-0.0603598460666584	0.051	140.801752677702	0.075	0.0251157028047664
953	953	hsa:3655	2	175	-0.0941851296901305	0.099	33.9438656280428	0.009	0.00714864102226968
954	954	hsa:3679	3	745	-0.0576891041785121	0.069	137.717015579357	0.006	0.00363891285783353
955	955	hsa:3680	19	1957	-0.0334401818029384	0.068	205.446445959104	0.481	0.144573794638376
956	956	hsa:3681	21	1963	-0.0333243543632925	0.066	296.945228821811	0.489	0.143086563618266
957	957	hsa:3682	11	1916	-0.0314918005925896	0.074	299.924367088608	0.446	0.145584819426472
958	958	hsa:3684	3	925	-0.0703661158538289	0.022	112.513802336904	0.003	0.000701306483851898
959	959	hsa:3685	3	878	-0.0675304352714636	0.019	157.796786757546	0.272	0.0323789128406095
960	960	hsa:3687	3	654	-0.0484858143732243	0.109	111.285272638754	0.275	0.135109062552605
961	961	hsa:3689	3	997	-0.0670392110833437	0.021	159.161051606621	0.007	0.00144428646176427
962	962	hsa:3691	3	889	-0.0473552016746683	0.072	124.335418695229	0.255	0.0917555852099806
963	963	hsa:3693	1	44	NA	1	7.2853700097371	0.000999000999000999	0.00790085392538984
964	964	hsa:3695	3	907	-0.0474966063331389	0.077	122.480720545278	0.11	0.0488822738045949
965	965	hsa:3696	1	44	NA	1	8.69060370009737	0.001	0.00790775527898214
966	966	hsa:3704	2	138	0.016838766208619	0.604	18.5807935735151	0.03	0.0907945902880155
967	967	hsa:3705	4	642	-0.0127940276950919	0.357	120.600097370983	0.276	0.326867486146182
968	968	hsa:3706	12	1920	-0.010250213374846	0.309	243.12047224927	0.289	0.305029229293394
969	969	hsa:3707	3	640	-0.0203262385323572	0.276	78.7005842259007	0.007	0.0140054535174466
970	970	hsa:80271	3	640	-0.019985765525115	0.279	92.3956913339825	0.259	0.262124661296392
971	971	hsa:3708	2	244	-0.0241225234234161	0.314	28.889605647517	0.165	0.205176516405433
972	972	hsa:3710	12	1926	-0.0132037414083588	0.266	263.357667964946	0.493	0.397545512543694
973	973	hsa:3712	3	110	-0.216157700103915	0.006	18.8933544303797	0.019	0.00114904158049096
974	974	hsa:182	1	1	NA	1	0.43356864654333	0.01	0.0560517018598809
975	975	hsa:3716	4	1456	-0.0561468321824205	0.006	234.676387536514	0.328	0.0142300913613329
976	976	hsa:3717	3	895	-0.0534255399552574	0.029	133.871592015579	0.001	0.000331998227111357
977	977	hsa:3718	3	893	-0.0546879296898676	0.023	121.281085686465	0.000999000999000999	0.000268394969405064
978	978	hsa:83700	5	1701	-0.0302797080483349	0.082	325.425462512171	0.459	0.161080895545869
979	979	hsa:3726	10	1916	-0.0283820692099974	0.075	272.310564751704	0.428	0.142488665887962
980	980	hsa:3728	11	1916	-0.0227721481444971	0.125	220.028407984421	0.415	0.205368886834872
981	981	hsa:3753	2	90	-0.140547916899285	0.066	13.1024829600779	0.352	0.110636002844373
982	982	hsa:3758	18	1957	-0.0201199209832243	0.142	208.97429406037	0.505	0.260674818847696
983	983	hsa:3759	3	221	-0.026940047501114	0.293	43.3223709834469	0.034	0.0558766331011859
984	984	hsa:3761	3	221	-0.0256993874188258	0.276	43.4674050632911	0.000999000999000999	0.00253559054660553
985	985	hsa:3779	2	98	-0.133990944402411	0.066	14.3863437195716	0.402	0.122827339693223
986	986	hsa:3784	2	133	-0.0801614982448919	0.117	17.3849318403116	0.438	0.20350389830964
987	987	hsa:3791	3	1003	-0.050799415608582	0.026	113.345740019474	0.021	0.00464803880389178
988	988	hsa:9493	5	1064	-0.0420099187850493	0.044	152.114435248296	0.575	0.118326857346191
989	989	hsa:3799	21	1963	-0.0173973275528594	0.203	277.721129503408	0.515	0.340622003573561
990	990	hsa:3800	19	1957	-0.0171622754308393	0.21	282.14053067186	0.489	0.3364166028238
991	991	hsa:3815	4	1480	-0.0504192448311024	0.007	172.575657254138	0.456	0.0215367674572675
992	992	hsa:3817	3	71	-0.0785516102071123	0.271	8.92702044790652	0.246	0.247201541370013
993	993	hsa:354	5	1466	-0.013891092222601	0.276	164.451484907498	0.324	0.305326280963294
994	994	hsa:3897	2	7	-0.276026223736942	0.302	1.62361246348588	0.131	0.167342758532314
995	995	hsa:3909	4	1190	-0.0571766111840423	0.012	138.702263875365	0.338	0.0263946552994838
996	996	hsa:3910	3	585	-0.0222207542871955	0.299	93.1531402142162	0.000999000999000999	0.00272298089808901
997	997	hsa:3911	3	585	-0.024733998220368	0.272	102.421932814021	0.001	0.00250504070973377
998	998	hsa:3912	3	585	-0.0280032586212427	0.249	92.5344693281402	0.005	0.0095723315875865
999	999	hsa:3913	4	1190	-0.055000505828853	0.018	145.662122687439	0.146	0.0182423465647295
1000	1000	hsa:3914	1	17	NA	1	4.47451314508277	0.000999000999000999	0.00790085392538984
1001	1001	hsa:3915	2	122	0.0704840363438825	0.777	18.0103456669912	0.000999000999000999	0.00633481634671467
1002	1002	hsa:3918	4	1190	-0.0571988921262456	0.014	181.584444985394	0.291	0.0264937514618372
1003	1003	hsa:3920	7	1674	-0.0351714063602493	0.035	201.417429406037	0.505	0.0890043018877512
1004	1004	hsa:27040	4	1397	-0.0543244677755904	0.008	148.473734177215	0.392	0.0212144353054851
1005	1005	hsa:9113	2	50	0.00583211843519804	0.533	6.1735394352483	0.156	0.289948145206287
1006	1006	hsa:3931	20	1959	-0.0294359967222565	0.073	269.105696202532	0.55	0.169237583469363
1007	1007	hsa:3948	4	838	0.00130220909060152	0.521	130.09858812074	0.058	0.13596037638617
1008	1008	hsa:51176	3	853	0.0149799520710619	0.72	128.774318403116	0.112	0.283672204676508
1009	1009	hsa:3955	22	1963	-0.00092773399150711	0.507	222.705452775073	0.469	0.579333736948035
1010	1010	hsa:5641	4	380	-0.0949569510885493	0.025	47.6690847127556	0.102	0.0177777378955201
1011	1011	hsa:3972	2	7	NA	1	1.32938169425511	0.048	0.193754604867564
1012	1012	hsa:3976	5	1570	-0.0689370356547193	0.000999000999000999	265.870204479065	0.532	0.0045386703443401
1013	1013	hsa:3977	4	1310	-0.0562970541800797	0.01	158.031499513145	0.285	0.0195522434113995
1014	1014	hsa:10859	2	22	0.0143576830751316	0.549	4.18748782862707	0.006	0.0221213598199647
1015	1015	hsa:11006	4	861	-0.0421464600929832	0.073	118.107302823759	0.005	0.00325419881959935
1016	1016	hsa:8994	4	325	-0.0122385731552268	0.429	58.1132424537488	0.005	0.0153252007335616
1017	1017	hsa:3984	3	351	-0.0461121631438263	0.143	50.9711051606621	0.808	0.364899953460912
1018	1018	hsa:3988	4	62	-0.174180134223938	0.047	7.41204965920156	0.813	0.162955847494498
1019	1019	hsa:3991	20	1959	-0.0145065988195672	0.237	256.067721518987	0.512	0.377273760078921
1020	1020	hsa:3996	2	64	-0.171164736715791	0.032	9.06920642648491	0.443	0.0745119604514528
1021	1021	hsa:3993	2	64	-0.171164736715791	0.032	11.8800876338851	0.024	0.00627588159345916
1022	1022	hsa:4008	13	1926	-0.0277118913410672	0.095	242.876533592989	0.56	0.209272674156157
1023	1023	hsa:23175	4	964	-0.0109374980614554	0.349	141.888120740019	0.205	0.260239833238124
1024	1024	hsa:9663	2	56	0.0973544854720737	0.812	9.95939629990263	0.135	0.3519608188631
1025	1025	hsa:64900	4	964	-0.0103183943975995	0.355	176.748052580331	0.196	0.255030050842195
1026	1026	hsa:9227	6	1599	-0.00742796850522661	0.366	188.259810126582	0.301	0.353166522894873
1027	1027	hsa:4035	3	91	-0.167602407950989	0.028	11.0712512171373	0.224	0.0380814514944982
1028	1028	hsa:4041	2	34	0.0625224730526058	0.652	4.77663096397274	0.104	0.250284420170341
1029	1029	hsa:4040	2	34	-0.00250089892210423	0.503	6.22405063291139	0.017	0.0492683569316049
1030	1030	hsa:4046	4	1150	-0.0269625986369261	0.13	156.107692307692	0.018	0.0165147941780933
1031	1031	hsa:4047	6	821	-0.0103956160400036	0.375	138.64746835443	0.017	0.0386029913231025
1032	1032	hsa:4049	2	22	-0.0310161403466157	0.444	4.75535540408958	0.014	0.0377971877873388
1033	1033	hsa:4048	2	8	0.214285714285714	0.738	1.48515092502434	0.014	0.0575751671595299
1034	1034	hsa:4050	5	1334	-0.0116217448805301	0.288	181.232254138267	0.041	0.0642234523553524
1035	1035	hsa:4052	4	1010	-0.0476681314968612	0.062	125.624440116845	0.284	0.0887337892672185
1036	1036	hsa:4055	2	117	-0.12914584180046	0.041	11.4193037974684	0.717	0.133076181341462
1037	1037	hsa:4056	4	521	-0.0327412733496414	0.178	67.1778481012658	0.423	0.270031000466559
1038	1038	hsa:4060	2	34	-0.158325124095281	0.172	6.66672346640701	0.036	0.0376752063075656
1039	1039	hsa:4066	3	55	-0.0454183037550597	0.388	9.23303310613437	0.078	0.136121309996938
1040	1040	hsa:4067	4	1514	-0.0338255388995253	0.076	297.475121713729	0.21	0.0819972082038891
1041	1041	hsa:8379	2	19	-0.355409326655455	0.04	3.47339337877313	0.07	0.0192587804130427
1042	1042	hsa:10459	3	74	-0.0602352539636602	0.256	15.5809396299903	0.007	0.0131253659522575
1043	1043	hsa:4116	2	4	-0.707106781186548	0.237	0.596957156767283	0.35	0.289455456911574
1044	1044	hsa:10892	12	1926	-0.0319691653228499	0.059	336.77429406037	0.44	0.120745110130317
1045	1045	hsa:9794	20	1959	-0.0197100967093427	0.152	263.68700097371	0.477	0.262762728555835
1046	1046	hsa:10905	5	25	-0.35941798306388	0.012	2.97461051606621	0.848	0.0568606720197834
1047	1047	hsa:11253	5	25	-0.267651689515655	0.046	4.83502921129503	0.129	0.0363579547967115
1048	1048	hsa:4124	6	166	0.00460489797326291	0.497	27.4113437195716	0.105	0.206285227082543
1049	1049	hsa:4128	4	858	-0.0395326990564761	0.074	137.257838364167	0.559	0.173128953988733
1050	1050	hsa:5604	2	346	0.0598171352897009	0.927	51.1544790652386	0.118	0.351443256838692
1051	1051	hsa:5605	1	11	NA	1	1.91747809152872	0.067	0.248105198192608
1052	1052	hsa:5606	3	853	0.00890870682302627	0.601	96.6421859785784	0.065	0.165734370130783
1053	1053	hsa:5607	19	1957	-0.0379858995121044	0.021	219.317259006816	0.486	0.0569982595396497
1054	1054	hsa:5608	1	18	NA	1	3.452288218111	0.006	0.0366959748585245
1055	1055	hsa:5609	18	1957	-0.0126645300549281	0.268	260.473636806232	0.508	0.407620871729693
1056	1056	hsa:4296	4	1318	-0.019057614451288	0.217	159.167112950341	0.347	0.27004393207469
1057	1057	hsa:7786	2	18	-0.294117647058824	0.099	2.91166017526777	0.818	0.2845325545587
1058	1058	hsa:9175	2	18	-0.294117647058824	0.108	1.92770204479065	0.581	0.236473905760608
1059	1059	hsa:10746	5	1695	-0.0401252413084825	0.032	316.880525803311	0.484	0.0800371788239613
1060	1060	hsa:4215	5	1717	-0.0360525250443203	0.043	303.901850048686	0.594	0.119215525741318
1061	1061	hsa:4216	20	1963	-0.031507130490678	0.053	215.817672833496	0.517	0.125967213271132
1062	1062	hsa:9064	4	853	0.0115867782636505	0.629	120.514045764362	0.004	0.0175744737094022
1063	1063	hsa:6885	4	1445	-0.0344714588989239	0.059	261.272711781889	0.594	0.152488433128913
1064	1064	hsa:11184	4	761	0.0405341449486685	0.902	98.3927458617332	0.015	0.0717475041718964
1065	1065	hsa:5871	2	33	-0.138477927351749	0.221	5.72254138266797	0.104	0.109701642706702
1066	1066	hsa:9448	4	1061	-0.02039778836288	0.214	161.744595910419	0.185	0.16743318544024
1067	1067	hsa:5594	19	1963	-0.0354423259577431	0.046	282.329625121714	0.481	0.10644822784844
1068	1068	hsa:5602	19	1963	-0.0268615378400823	0.083	330.263948393379	0.501	0.173819595036411
1069	1069	hsa:6300	17	1957	-0.0280203120883812	0.09	322.898003894839	0.484	0.180060312128761
1070	1070	hsa:5603	18	1959	-0.0271685393527792	0.094	295.325511197663	0.522	0.196985850479541
1071	1071	hsa:1432	18	1959	-0.0274962216068648	0.095	296.536441090555	0.487	0.188454441919902
1072	1072	hsa:5598	11	1920	-0.0371080009466261	0.021	220.814581304771	0.606	0.068263640115467
1073	1073	hsa:5599	19	1963	-0.0275735446814297	0.08	302.903724440117	0.516	0.172854929074348
1074	1074	hsa:23542	4	1267	-0.0199384422760448	0.203	163.171421616358	0.084	0.0864790096259101
1075	1075	hsa:23162	18	1957	-0.0230958807878852	0.115	330.829868549172	0.516	0.226944148548849
1076	1076	hsa:5601	10	1921	-0.0270404797995358	0.084	195.063607594937	0.479	0.169513992854565
1077	1077	hsa:9261	4	1324	-0.0341020812587377	0.073	207.133544303797	0.167	0.0659174355979297
1078	1078	hsa:7867	4	1324	-0.0353718315051678	0.069	200.78629503408	0.297	0.100163060545167
1079	1079	hsa:8550	2	75	0.074345257805749	0.782	9.67857838364167	0.056	0.180786694315738
1080	1080	hsa:4137	4	1393	-0.0338099990503168	0.073	177.882862706913	0.208	0.0787671979555476
1081	1081	hsa:4141	4	238	-0.0457170513162322	0.177	37.0219814995131	0.307	0.212602048134751
1082	1082	hsa:4143	4	602	-0.0491648916746801	0.073	115.5782375852	0.745	0.212736004271459
1083	1083	hsa:27430	4	602	-0.048067869175431	0.076	99.6594693281402	0.616	0.190144600378025
1084	1084	hsa:4145	5	1448	-0.0427848256062343	0.03	257.793792599805	0.44	0.0703235075319455
1085	1085	hsa:4149	4	1283	-0.0334266388466231	0.07	136.196494644596	0.438	0.137503857793809
1086	1086	hsa:4157	5	1492	-0.0182647263384111	0.179	169.194741966894	0.347	0.234712602671809
1087	1087	hsa:56922	3	106	-0.18478315206717	0.015	17.3842502434275	0.022	0.00297541790815624
1088	1088	hsa:64087	3	106	-0.170173649561128	0.015	20.1914556962025	0.001	0.000181611905352931
1089	1089	hsa:84693	3	72	-0.204618247108921	0.024	8.64844206426485	0.804	0.0954738575180074
1090	1090	hsa:4170	3	419	-0.0344217551933815	0.198	56.2185491723466	0.061	0.0654189127908786
1091	1091	hsa:4171	4	35	-0.464632580561277	0.009	11.0296738072055	0.000999000999000999	0.000113460109219431
1092	1092	hsa:4173	4	35	-0.470004055481061	0.009	10.1067672833496	0.000999000999000999	0.000113460109219431
1093	1093	hsa:4174	4	35	-0.464632580561277	0.009	10.1633641674781	0.000999000999000999	0.000113460109219431
1094	1094	hsa:4175	4	35	-0.464632580561277	0.008	10.2197663096397	0.000999000999000999	0.000101794753379561
1095	1095	hsa:4176	4	35	-0.470004055481061	0.006	9.33541869522882	0.000999000999000999	7.80704331013144e-05
1096	1096	hsa:4191	2	36	0.10690449676497	0.779	4.90021908471276	0.081	0.237444714502913
1097	1097	hsa:4193	2	205	-0.0330280826285929	0.291	32.9087633885102	0.018	0.0327470097613125
1098	1098	hsa:4194	2	61	-0.116205641179575	0.164	10.6013145082765	0.091	0.077676205722953
1099	1099	hsa:23195	4	11	0.138749187018864	0.735	1.65647517039922	0.03	0.106158461029819
1100	1100	hsa:10873	5	1556	0.00566595922961667	0.596	228.477726387537	0.183	0.350739100742456
1101	1101	hsa:4233	3	1016	-0.0614667743369336	0.005	105.806329113924	0.59	0.0201365528204597
1102	1102	hsa:4245	3	8	-0.618589574131742	0.031	0.941650438169426	0.7	0.104820613500055
1103	1103	hsa:4247	2	10	0.182574185835055	0.774	1.75058422590068	0.1	0.275448681775112
1104	1104	hsa:4248	5	159	0.00593367904412564	0.503	18.0888753651412	0.319	0.454049871896032
1105	1105	hsa:11282	5	159	0.00859619660035107	0.537	22.2764605647517	0.016	0.0494634887845247
1106	1106	hsa:4249	6	159	0.00786686096309129	0.521	25.2613437195716	0.032	0.0849275783547912
1107	1107	hsa:146664	2	5	0	0.592	1.27765335929893	0.046	0.125358768324131
1108	1108	hsa:11343	6	1598	0.0202774827990029	0.847	231.694230769231	0.222	0.502263725015078
1109	1109	hsa:4257	4	738	-0.0111254073178133	0.367	121.923661148978	0.611	0.559482919430261
1110	1110	hsa:4258	3	177	0.0257882064929892	0.688	27.7422833495618	0.265	0.492627162122231
1111	1111	hsa:4259	4	738	-0.01158165430561	0.359	116.487317429406	0.154	0.21535199356061
1112	1112	hsa:100507436	2	3	NA	1	0.863145082765336	0.000999000999000999	0.00790085392538984
1113	1113	hsa:4277	3	12	-0.307956590291437	0.117	2.23877799415774	0.004	0.00405617577863783
1114	1114	hsa:4282	3	129	-0.152423429371978	0.012	17.0858812074002	0.228	0.0188818426519509
1115	1115	hsa:9562	2	96	-0.107387103916525	0.104	13.5683787731256	0.083	0.0496536727684591
1116	1116	hsa:4286	4	1503	-0.0299086438582501	0.079	197.55959104187	0.095	0.0442208545332948
1117	1117	hsa:8569	4	1390	-0.0440399982039885	0.022	210.076898734177	0.38	0.048356721681763
1118	1118	hsa:2872	4	1390	-0.0441678909356508	0.022	174.752799415774	0.915	0.0987486015117217
1119	1119	hsa:4292	5	28	-0.225762051191522	0.05	4.66791626095424	0.025	0.00960576465958491
1120	1120	hsa:4301	3	768	-0.0169131839395511	0.324	123.718743914314	0.158	0.20334342949215
1121	1121	hsa:23417	2	24	-0.174422706157428	0.19	3.42018013631938	0.364	0.253909363872433
1122	1122	hsa:4323	2	102	-0.0703388482908791	0.21	15.352288218111	0.073	0.0793778751748887
1123	1123	hsa:4313	4	1324	-0.0455305745234976	0.027	195.923271665044	0.003	0.000844105973666639
1124	1124	hsa:4337	6	310	-0.0626634832006043	0.072	37.5975900681597	0.992	0.259920601992723
1125	1125	hsa:4338	3	14	-0.22463246501184	0.194	2.56996105160662	0.148	0.130652236872929
1126	1126	hsa:8777	6	1703	-0.0358733500008373	0.046	186.78729308666	0.213	0.0551194034045129
1127	1127	hsa:10199	14	1839	-0.0083727599630292	0.345	232.172395326193	0.313	0.348334012198162
1128	1128	hsa:4351	2	40	-0.0877058019307029	0.249	4.08717137293087	0.624	0.444671707577389
1129	1129	hsa:64398	4	694	0.0342019828543375	0.875	118.352702044791	0.043	0.16103825666623
1130	1130	hsa:4357	3	304	-0.0794383847981614	0.039	44.047541382668	0.34	0.0705830236814158
1131	1131	hsa:22808	2	339	0.013938569134327	0.635	46.7787974683544	0.051	0.143467490714756
1132	1132	hsa:9902	3	241	-0.103319954448339	0.031	36.460029211295	0.003	0.000956310729027424
1133	1133	hsa:4440	5	33	-0.0518270463460887	0.362	6.75068159688413	0.189	0.251923240393754
1134	1134	hsa:124540	5	33	-0.0428136469815515	0.38	4.91275559883155	0.123	0.18991186235699
1135	1135	hsa:4524	5	758	-0.0298266493115557	0.167	99.7740506329114	0.056	0.0530460875926053
1136	1136	hsa:10588	4	166	-0.0306114903429963	0.321	21.4830331061344	0.057	0.0915036294015937
1137	1137	hsa:4548	3	209	-0.0921088313317217	0.047	26.3491480038948	0.474	0.107026979226708
1138	1138	hsa:4594	3	74	-0.210021473786575	0.014	9.37823758519961	0.884	0.0667313445468439
1139	1139	hsa:4597	5	1209	-0.0413186701603029	0.036	138.649196689387	0.67	0.11396009943981
1140	1140	hsa:4598	2	4	0.408248290463863	0.826	0.87794547224927	0.014	0.0631378031716314
1141	1141	hsa:4609	3	1065	-0.016668179200149	0.26	132.302775073028	0.025	0.0392336951635235
1142	1142	hsa:4615	4	1381	-0.0504119657464086	0.017	212.897492697176	0.046	0.00637615884922163
1143	1143	hsa:4629	2	74	0.0448967075015693	0.711	9.12850535540409	0.04	0.129685224689899
1144	1144	hsa:79784	2	85	-0.00426833334940628	0.534	14.548417721519	0.069	0.158474948668034
1145	1145	hsa:4621	20	1959	-0.00606582438154245	0.42	302.590287244401	0.506	0.541653799580919
1146	1146	hsa:4622	2	73	0.133336504274826	0.919	8.76796494644596	0.046	0.176011309395737
1147	1147	hsa:4627	3	518	0.0185842280431226	0.69	73.7490019474197	0.007	0.0305879495586643
1148	1148	hsa:10398	3	618	0.0403782147859207	0.872	91.8562074001947	0.000999000999000999	0.00700885953365302
1149	1149	hsa:4668	2	15	-0.114833850352643	0.335	2.06175754625122	0.046	0.0797119022829082
1150	1150	hsa:55577	3	67	-0.116818239317044	0.114	11.2243670886076	0.178	0.0993806495248629
1151	1151	hsa:4669	5	16	0.111573113565867	0.701	3.42901655306719	0.005	0.023320744478527
1152	1152	hsa:54187	4	44	-0.114524269573394	0.172	7.05830087633885	0.226	0.165108084614782
1153	1153	hsa:9	4	636	-0.0560031519677683	0.032	81.004406037001	0.554	0.0892181095201013
1154	1154	hsa:4684	5	1222	0.00767894420196468	0.656	185.08347127556	0.127	0.290355873409572
1155	1155	hsa:4686	3	23	0.229827537709196	0.902	4.44398734177215	0.095	0.296231970646542
1156	1156	hsa:22916	9	1808	-0.00291210807116447	0.448	203.948417721519	0.424	0.505459208134518
1157	1157	hsa:4690	4	1233	-0.0567176024430278	0.008	162.034493670886	0.417	0.0223611506024041
1158	1158	hsa:8440	4	1226	-0.0666706582633265	0.005	169.418841285297	0.5	0.01747866136777
1159	1159	hsa:8648	2	58	-0.0669416925698642	0.252	9.88563777994158	0.105	0.122565924843014
1160	1160	hsa:10499	2	58	-0.0669416925698642	0.255	10.5889483933788	0.086	0.105700400783993
1161	1161	hsa:8202	2	58	-0.063594607941371	0.266	7.79535053554041	0.882	0.574757684385357
1162	1162	hsa:9611	2	58	-0.01359825389485	0.432	10.9519717624148	0.191	0.288363889926567
1163	1163	hsa:9612	4	745	0.0828992917390018	0.997	116.768816942551	0.002	0.0143919195392403
1164	1164	hsa:9436	5	1058	-0.0706511459492199	0.000999000999000999	107.017721518987	0.092	0.000946168208066779
1165	1165	hsa:4734	4	1271	-0.0347256747176561	0.065	166.530404089581	0.128	0.0481652539609198
1166	1166	hsa:23327	4	1293	-0.0359321805779435	0.054	188.097565725414	0.508	0.126078708190752
1167	1167	hsa:4758	2	23	0.162328251185891	0.836	5.49727361246349	0.013	0.0600123633600592
1168	1168	hsa:10825	2	23	0.162328251185891	0.83	2.85786270691334	0.084	0.25540304902679
1169	1169	hsa:129807	4	184	0.0316577872142979	0.708	36.7958130477118	0.075	0.208979210423988
1170	1170	hsa:50674	3	61	-0.0995231091210054	0.201	7.68972736124635	0.489	0.326304064395536
1171	1171	hsa:4763	4	1197	-0.0424911204410769	0.037	137.47641187926	0.078	0.0197629927005675
1172	1172	hsa:4771	5	1252	-0.0214796301916984	0.202	168.628432327167	0.407	0.287619897310355
1173	1173	hsa:4772	4	1487	-0.0347975056517456	0.056	216.186757546251	0.266	0.0775584454706329
1174	1174	hsa:4773	12	1932	-0.015496359450751	0.234	324.141431353457	0.459	0.347043740410839
1175	1175	hsa:4775	4	1470	-0.0310036168486008	0.069	204.873734177215	0.375	0.120434618958887
1176	1176	hsa:4776	1	4	NA	1	0.770666991236612	0.007	0.0417329159094878
1177	1177	hsa:4780	5	1404	-0.039228527058335	0.033	265.339167478092	0.321	0.0587653229245849
1178	1178	hsa:4790	1	62	NA	1	11.6152385589094	0.014	0.0737617712911363
1179	1179	hsa:4791	4	1460	-0.0421353358112697	0.024	207.393962999026	0.346	0.0480886130780466
1180	1180	hsa:4792	3	854	-0.0263141967467628	0.171	104.579990262902	0.004	0.00566868600599374
1181	1181	hsa:4793	20	1963	-0.0243286161095444	0.1	299.57852969815	0.483	0.19466463559503
1182	1182	hsa:4794	3	643	0.0219121310114958	0.756	82.3011441090555	0.000999000999000999	0.00618429802565542
1183	1183	hsa:9054	4	305	-0.0712563889566877	0.054	38.1816212268744	0.784	0.176207406101076
1184	1184	hsa:4800	2	16	-0.578530007602864	0.032	2.96292599805258	0.259	0.048011941366638
1185	1185	hsa:4802	2	16	-0.578530007602864	0.032	1.49106621226874	0.607	0.0959787596643765
1186	1186	hsa:27018	5	1496	-0.0223845392716244	0.147	190.42035053554	0.505	0.267284568193702
1187	1187	hsa:56954	2	24	-0.288675134594813	0.03	2.85	0.964	0.13138997681852
1188	1188	hsa:85409	3	201	0.00317349995745685	0.528	29.0175024342746	0.327	0.475918339669855
1189	1189	hsa:4824	1	2	NA	1	0.497760467380721	0.024	0.113512834767221
1190	1190	hsa:4825	18	1957	-0.0171612293800864	0.202	319.611173320351	0.491	0.32837163991345
1191	1191	hsa:4832	1	52	NA	1	8.43179162609542	0.026	0.120891127264977
1192	1192	hsa:4833	1	52	NA	1	6.16231742940604	0.101	0.332556110976229
1193	1193	hsa:10201	3	456	0.000842498656975994	0.505	82.6255842259007	0.074	0.160200968516065
1194	1194	hsa:29922	3	456	0.00199539155599577	0.524	57.8858325219085	0.014	0.0433921578869892
1195	1195	hsa:349565	6	1726	-0.0300711791267014	0.055	164.09323271665	0.336	0.0922349036119637
1196	1196	hsa:4837	4	904	0.00918062952681101	0.602	157.500559883155	0.146	0.301614273382324
1197	1197	hsa:23530	6	1722	-0.0329432724072591	0.042	233.578797468354	0.505	0.102938122045702
1198	1198	hsa:4838	1	2	NA	1	0.565506329113924	0.111	0.355002983621348
1199	1199	hsa:65083	21	1963	-0.00637473770557982	0.38	207.818962999026	0.51	0.511811958712036
1200	1200	hsa:4846	4	1553	-0.0175625239345247	0.21	161.529552093476	0.331	0.254843446151466
1201	1201	hsa:4854	8	1853	0.0104001142884761	0.705	267.09888023369	0.34	0.582079602868769
1202	1202	hsa:50508	20	1963	-0.00901059367672794	0.372	286.215725413827	0.499	0.498227521130614
1203	1203	hsa:4862	5	1446	-0.0205376259121137	0.165	214.105598831548	0.45	0.267323574471475
1204	1204	hsa:80896	4	44	-0.196096272007731	0.05	7.98264362220058	0.032	0.0119004026395782
1205	1205	hsa:9572	4	479	0.0179401932935533	0.671	60.8647517039922	0.006	0.026229317337804
1206	1206	hsa:10062	5	1601	-0.00792294800719803	0.377	158.46623661149	0.483	0.492237262102426
1207	1207	hsa:9971	5	1509	0.0034977166593488	0.548	225.024123661149	0.327	0.487283220840925
1208	1208	hsa:3164	3	679	0.0357985725802954	0.868	78.7642891918208	0.066	0.221112437033985
1209	1209	hsa:4893	3	1192	-0.0406058499000099	0.041	237.842721518987	0.227	0.0528357317254571
1210	1210	hsa:3084	4	1000	-0.0500914503108608	0.032	114.908836416748	0.234	0.0441376681060737
1211	1211	hsa:8829	6	656	0.0404483450615893	0.912	110.015798442064	0.096	0.300786855100508
1212	1212	hsa:64324	4	66	-0.0655898398140841	0.269	7.70511197663097	0.261	0.256703676235929
1213	1213	hsa:50814	5	1446	-0.0300805947621201	0.075	133.834688412853	0.43	0.143004150852626
1214	1214	hsa:4905	20	1959	-0.019041704737102	0.154	285.183154819864	0.53	0.286133679057745
1215	1215	hsa:22978	18	1957	-0.00511485959236891	0.4	316.557254138267	0.504	0.524456300145441
1216	1216	hsa:56953	1	33	NA	1	4.80640214216164	0.001	0.00790775527898214
1217	1217	hsa:4915	4	1302	-0.0500055140504473	0.012	206.903919182084	0.8	0.0542015249328801
1218	1218	hsa:83594	6	1726	-0.0295649140339029	0.056	293.370861733204	0.562	0.140322853649581
1219	1219	hsa:318	3	421	0.00659817870274684	0.561	74.7366358325219	0.01	0.0346877775785007
1220	1220	hsa:53343	4	402	-0.0363711261618536	0.186	63.1154819863681	0.549	0.33510398502011
1221	1221	hsa:8650	4	534	0.0776003523311811	0.987	75.7843962999026	0.031	0.137284250849855
1222	1222	hsa:9253	3	76	0.119120502259277	0.887	9.08330087633885	0.125	0.354728135077322
1223	1223	hsa:57122	2	4	-0.408248290463863	0.313	0.538315481986368	0.602	0.502918400624497
1224	1224	hsa:55746	9	98	-0.0766025494767036	0.168	15.1511197663096	0.106	0.0895405380830669
1225	1225	hsa:9972	2	3	0	0.697	0.71881694255112	0.053	0.158788422084325
1226	1226	hsa:8021	15	1929	-0.00740930913332128	0.344	284.361879259981	0.459	0.449343387959977
1227	1227	hsa:79023	3	16	0.0924354033769981	0.671	2.40630477117819	0.145	0.323993097086665
1228	1228	hsa:4927	3	10	0.450748935855209	0.965	2.30452775073028	0.082	0.279856159756739
1229	1229	hsa:4928	7	98	-0.0918400050083867	0.121	14.7512414800389	0.036	0.0280360918779582
1230	1230	hsa:11097	5	42	-0.124799974741871	0.134	4.91701557935735	0.664	0.304243520833182
1231	1231	hsa:4931	11	1374	-0.0050348189473925	0.386	206.799902629017	0.169	0.243308108009281
1232	1232	hsa:10482	3	28	-0.0953772305865502	0.287	5.26416747809153	0.071	0.0997117616746333
1233	1233	hsa:29107	4	29	0.0584885338619664	0.653	4.26723466407011	0.027	0.088826680496673
1234	1234	hsa:55916	7	98	-0.0566192487569045	0.229	14.0121713729309	0.535	0.379737914247581
1235	1235	hsa:4952	3	787	-0.0680622746403158	0.014	109.867916260954	0.872	0.065992343724604
1236	1236	hsa:4953	3	101	-0.0919728206924658	0.145	12.707400194742	0.761	0.353561209837922
1237	1237	hsa:4967	2	21	-0.145478593490662	0.244	2.8337147030185	0.783	0.507283111507039
1238	1238	hsa:3175	2	7	0.534522483824849	1	1.54997565725414	0.000999000999000999	0.00790085392538984
1239	1239	hsa:26873	5	277	0.0402001334817378	0.808	30.2519717624148	0.019	0.0794697741552885
1240	1240	hsa:391189	2	41	-0.0158163316770142	0.455	6.94793086660175	0.001	0.00395632197825107
1241	1241	hsa:81797	2	41	-0.0158163316770142	0.454	8.83186465433301	0.000999000999000999	0.00394513430425198
1242	1242	hsa:8390	2	41	-0.0158163316770142	0.453	8.667429406037	0.012	0.0337831732507205
1243	1243	hsa:26740	2	41	-0.0158163316770142	0.45	10.595959104187	0.000999000999000999	0.00391435376022962
1244	1244	hsa:392392	2	41	-0.0158163316770142	0.453	6.40511197663096	0.001	0.00394092714991401
1245	1245	hsa:138883	2	41	0	0.508	10.5299659201558	0.000999000999000999	0.00435734518905614
1246	1246	hsa:158131	2	41	-0.0158163316770142	0.454	11.5851752677702	0.000999000999000999	0.00394513430425198
1247	1247	hsa:26212	2	41	0	0.506	10.634152872444	0.000999000999000999	0.00434218435048852
1248	1248	hsa:81472	4	631	0.0281190593054066	0.794	90.4474926971762	0.005	0.0259200870616037
1249	1249	hsa:26211	2	41	0	0.512	9.68128042843233	0.000999000999000999	0.00438764329852949
1250	1250	hsa:26696	2	41	-0.0158163316770142	0.455	8.54233203505355	0.000999000999000999	0.00395282392697564
1251	1251	hsa:343171	2	41	-0.0158163316770142	0.452	8.77295520934761	0.000999000999000999	0.00392974845261363
1252	1252	hsa:4994	2	41	-0.0158163316770142	0.457	10.05070593963	0.001	0.00397170801535102
1253	1253	hsa:8392	2	41	0	0.51	9.79819863680623	0.000999000999000999	0.00437249816145383
1254	1254	hsa:26689	2	41	0	0.507	10.4030428432327	0.000999000999000999	0.00434976575498105
1255	1255	hsa:79339	3	154	0.0895319830468759	0.87	32.1886319376826	0.032	0.127542875387483
1256	1256	hsa:81050	2	41	0	0.509	6.95282375851996	0.039	0.0976570122722848
1257	1257	hsa:81696	3	154	0.0865789041457796	0.859	24.4425754625122	0.071	0.231578999615913
1258	1258	hsa:26658	2	41	0	0.503	9.62059396299903	0.000999000999000999	0.00431942827548792
1259	1259	hsa:283160	2	41	-0.0158163316770142	0.455	12.9151655306719	0.000999000999000999	0.00395282392697564
1260	1260	hsa:81168	1	2	NA	1	0.488680623174294	0.04	0.168755032994728
1261	1261	hsa:9180	3	625	-0.0131307794709982	0.34	107.723661148978	0.003	0.00804571170471968
1262	1262	hsa:5020	3	152	0.00297323478305045	0.532	25.7530428432327	0.01	0.0331770201103441
1263	1263	hsa:5033	5	186	0.0185997606125248	0.614	31.520959104187	0.054	0.146102961174332
1264	1264	hsa:8974	6	709	-0.0343112890415773	0.118	106.105209347614	0.459	0.212086244732852
1265	1265	hsa:8761	4	33	-0.172884511970328	0.102	3.69856377799416	0.227	0.110342418235556
1266	1266	hsa:5048	3	377	-0.0233944454082268	0.312	54.6053797468354	0.108	0.147938114515558
1267	1267	hsa:5050	13	1933	-0.020132213380369	0.16	300.658154819864	0.431	0.253374807885137
1268	1268	hsa:10606	2	25	0.2043015673821	0.882	4.08405550146056	0.027	0.112818387678588
1269	1269	hsa:5058	7	1839	0.0122892581064762	0.755	229.875486854917	0.209	0.449156927962435
1270	1270	hsa:5063	12	1926	-0.00420037946544562	0.429	210.541480038948	0.474	0.52724492724606
1271	1271	hsa:10298	2	146	-0.0426603303741047	0.288	21.1341772151899	0.126	0.156628739384779
1272	1272	hsa:53354	6	1632	-0.0187196416521682	0.182	217.328992210321	0.457	0.290012806602961
1273	1273	hsa:80025	6	1632	-0.0177657511031718	0.192	216.961806231743	0.567	0.350286889960772
1274	1274	hsa:79646	6	1632	-0.0197011545143595	0.167	210.016966893866	0.681	0.360964316529417
1275	1275	hsa:55229	6	1632	-0.0196182875747749	0.168	199.264313534567	0.584	0.325893292688535
1276	1276	hsa:9061	5	1530	-0.0183225876699565	0.176	241.464581304771	0.224	0.166896793268466
1277	1277	hsa:56288	2	118	-0.100130082521374	0.096	21.8011684518014	0.279	0.123740756459937
1278	1278	hsa:50855	2	99	-0.12520869341262	0.076	10.939605647517	0.695	0.208156508955017
1279	1279	hsa:84612	2	99	-0.127639930177914	0.075	13.9973466407011	0.313	0.111548956985016
1280	1280	hsa:84552	2	99	-0.128855548560561	0.072	16.2149951314508	0.019	0.0103891466689815
1281	1281	hsa:55742	2	121	0.0721693410635865	0.799	22.9390944498539	0.002	0.0118875258857576
1282	1282	hsa:64098	3	580	-0.0478936940301607	0.12	76.7115628042843	0.696	0.290872527812889
1283	1283	hsa:5080	5	1648	-0.0256336934162486	0.1	187.643257059396	0.611	0.23188937252236
1284	1284	hsa:5091	20	1963	0.0135471400241731	0.81	286.098271665044	0.507	0.776152052505202
1285	1285	hsa:5095	2	36	-0.112687233963802	0.242	4.67268743914314	0.891	0.546435396999905
1286	1286	hsa:5096	2	36	-0.112687233963802	0.239	5.02911392405063	0.029	0.0413902074011768
1287	1287	hsa:5105	1	14	NA	1	3.39342745861733	0.043	0.178301872021409
1288	1288	hsa:5106	2	173	0.0802799546291567	0.895	26.4730282375852	0.052	0.189298802856366
1289	1289	hsa:5111	1	17	NA	1	4.91852482960078	0.003	0.0204274289709421
1290	1290	hsa:5130	7	1787	-0.0238093874330566	0.119	277.072663096397	0.561	0.247453326130715
1291	1291	hsa:27250	5	1524	-0.0499366841583184	0.011	209.939459591042	0.196	0.0153927633495167
1292	1292	hsa:5137	2	149	0.0583361794958076	0.793	21.8467137293087	0.158	0.385541203049978
1293	1293	hsa:5140	19	1959	-0.0154705470961048	0.208	358.550073028238	0.495	0.337030779127882
1294	1294	hsa:5141	6	1756	-0.0047465096485513	0.39	182.060053554041	0.31	0.376336494932592
1295	1295	hsa:5143	20	1959	-0.00751535646402425	0.354	315.005111976631	0.511	0.490194530417659
1296	1296	hsa:8654	3	387	-0.00491740226116075	0.462	70.5157984420643	0.213	0.326575416436441
1297	1297	hsa:5147	20	1959	-0.00783131390045398	0.348	255.925681596884	0.518	0.489116230336143
1298	1298	hsa:5151	1	29	NA	1	4.76837877312561	0.027	0.124521797150401
1299	1299	hsa:5155	2	150	-0.105127688895313	0.075	23.3739289191821	0.085	0.0386029913231025
1300	1300	hsa:5156	3	999	-0.0789542789916532	0.003	144.657302823759	0.000999000999000999	4.11125807281596e-05
1301	1301	hsa:5159	3	972	-0.0785962349459599	0.001	130.258227848101	0.003	4.11506948078884e-05
1302	1302	hsa:5160	2	89	0.0979299998528732	0.831	13.7092745861733	0.036	0.134902068346311
1303	1303	hsa:5162	1	8	NA	1	1.48266796494645	0.052	0.205738601140837
1304	1304	hsa:5163	2	90	-0.066162411360909	0.213	10.8778967867575	0.001	0.00201374851755029
1305	1305	hsa:5170	3	1036	-0.0144166015679825	0.29	172.552458617332	0.353	0.335687770745025
1306	1306	hsa:57026	4	269	0.0165469327774183	0.635	42.5200097370983	0.31	0.516792915544462
1307	1307	hsa:10400	6	1770	-0.0262935512948717	0.089	212.079016553067	0.476	0.176295936133606
1308	1308	hsa:5187	3	534	-0.0679304814335128	0.038	67.1666017526777	0.67	0.118914664621814
1309	1309	hsa:8864	3	579	-0.0705958693304491	0.021	68.4428432327167	0.057	0.00925034041233034
1310	1310	hsa:64065	3	353	0.028935046196482	0.721	60.0194741966894	0.001	0.00593734229430979
1311	1311	hsa:5198	5	336	-0.0496239052630448	0.118	54.9146786757546	0.209	0.115972849849987
1312	1312	hsa:5208	2	141	-0.116468038492695	0.042	15.2856377799416	0.537	0.10807522353001
1313	1313	hsa:5209	2	103	-0.198642202233718	0.008	10.5320593962999	0.929	0.0438633687821615
1314	1314	hsa:5210	2	103	-0.197774769036191	0.008	15.1687925998053	0.000999000999000999	0.000101794753379561
1315	1315	hsa:5211	2	112	-0.099303702046973	0.105	15.4607108081792	0.808	0.294139274585395
1316	1316	hsa:5213	3	247	0.00882894036310625	0.566	28.2407010710808	0.093	0.207620957541063
1317	1317	hsa:5214	2	81	-0.0785061748944172	0.2	11.633982473223	0.036	0.0427224546213129
1318	1318	hsa:5216	1	2	NA	1	0.501241480038948	0.068	0.25080083501881
1319	1319	hsa:5217	21	1959	-0.0117740490432869	0.304	250.91964459591	0.493	0.434325111745942
1320	1320	hsa:375189	13	1926	-0.0114937233585915	0.314	289.866626095424	0.431	0.406003283230529
1321	1321	hsa:5224	3	184	-0.0931729782152672	0.058	23.6768013631938	0.532	0.138186252736
1322	1322	hsa:5228	2	230	-0.128682315195897	0.012	37.9723953261928	0.013	0.0015234421099115
1323	1323	hsa:25796	3	23	-0.0919537713878397	0.339	2.96891431353457	0.6	0.527330933777786
1324	1324	hsa:5236	3	388	-0.0335282243791091	0.211	46.705111976631	0.136	0.130595425372032
1325	1325	hsa:55276	2	87	-0.0716401951571125	0.221	13.5567429406037	0.051	0.0618273209835729
1326	1326	hsa:283209	6	1709	0.00579583876529472	0.614	271.280379746835	0.334	0.529993213024688
1327	1327	hsa:5238	3	45	-0.162256281219514	0.1	7.23466407010711	0.222	0.106730118380307
1328	1328	hsa:5241	4	1468	-0.0281132073623991	0.104	207.315433300876	0.333	0.151098625311352
1329	1329	hsa:26227	3	41	-0.0714689579305918	0.286	5.96725900681597	0.666	0.50632884159523
1330	1330	hsa:5255	2	76	-0.200295811169278	0.013	7.7215676728335	0.903	0.0639169608781396
1331	1331	hsa:5256	2	76	-0.20711439197504	0.011	10.8129016553067	0.887	0.0549296688449692
1332	1332	hsa:5257	2	76	-0.208819037176481	0.011	11.9352482960078	0.476	0.032736505748373
1333	1333	hsa:5261	2	76	-0.200295811169278	0.014	9.79603213242454	0.404	0.0349260169097937
1334	1334	hsa:29085	2	31	-0.316637880938987	0.008	3.76806231742941	0.448	0.0237664924093881
1335	1335	hsa:8554	4	1235	-0.0285836256705523	0.111	171.962609542356	0.084	0.0529152250130076
1336	1336	hsa:9063	4	1292	-0.0362093857614423	0.052	120.977775073028	0.731	0.162305666666612
1337	1337	hsa:10401	5	1645	-0.0253459281386745	0.112	180.660004868549	0.202	0.108340544013199
1338	1338	hsa:5277	15	188	-0.0265255246021261	0.273	36.3026046738072	0.099	0.124619305452049
1339	1339	hsa:9488	8	29	0.133404026552878	0.824	4.9027994157741	0.008	0.0396963548221838
1340	1340	hsa:5279	12	42	-0.0764440053972041	0.229	8.96475170399221	0.074	0.0860471017735946
1341	1341	hsa:5281	18	188	-0.0165863424385832	0.338	33.1522638753651	0.089	0.135484162702479
1342	1342	hsa:10026	19	188	-0.0093922563242475	0.388	37.6456183057449	0.078	0.136121309996938
1343	1343	hsa:9487	11	42	-0.0445034960311552	0.328	5.31499513145083	0.169	0.21577450534351
1344	1344	hsa:93183	16	188	-0.012119254960721	0.362	27.3863680623174	0.045	0.0833592508202377
1345	1345	hsa:23556	16	72	-0.0287150896390572	0.355	7.77290652385589	0.193	0.252183337240196
1346	1346	hsa:84720	3	8	-0.504184173365516	0.092	0.780355404089581	0.953	0.301088772105938
1347	1347	hsa:9091	2	5	-0.316227766016838	0.395	0.620034079844207	0.362	0.421102773311133
1348	1348	hsa:94005	19	188	-0.0190780206586277	0.316	25.207400194742	0.013	0.0266807163982502
1349	1349	hsa:51604	18	72	0.00168147633056688	0.491	13.1210808179163	0.007	0.0229356381381903
1350	1350	hsa:5286	3	645	-0.018100011183488	0.29	86.9651898734177	0.092	0.123364079425698
1351	1351	hsa:5287	20	1959	-0.0264806589459576	0.106	351.263072054528	0.496	0.207438373360004
1352	1352	hsa:5290	2	606	-0.0743629176456944	0.007	103.066090555015	0.283	0.0143110481058174
1353	1353	hsa:5293	2	606	-0.0734724707344701	0.009	94.3879016553067	0.347	0.0211394658297274
1354	1354	hsa:5294	2	613	-0.0774192149672758	0.004	143.682083739046	0.088	0.00315106154259289
1355	1355	hsa:5295	2	607	-0.0792533965985892	0.006	74.75141187926	0.443	0.0184204219450809
1356	1356	hsa:5296	2	607	-0.079295507861394	0.006	89.3284810126582	0.709	0.0274803957216162
1357	1357	hsa:8503	2	607	-0.0803482894315134	0.006	79.6358812074002	0.661	0.025897969089076
1358	1358	hsa:30849	3	147	-0.0551632990474464	0.245	30.2080331061344	0.007	0.0126367068701947
1359	1359	hsa:29992	5	1447	-0.0661082772152492	0.003	225.335223953262	0.463	0.0105274688179266
1360	1360	hsa:11040	1	3	NA	1	1.22341772151899	0.001	0.00790775527898214
1361	1361	hsa:23396	3	920	-0.0145673946932875	0.314	139.38658714703	0.099	0.13898543518365
1362	1362	hsa:23761	2	54	0.0523648507924667	0.653	8.86324245374878	0.042	0.126057131264153
1363	1363	hsa:5308	5	1513	-0.0129873070610378	0.27	208.521202531646	0.085	0.109573337009815
1364	1364	hsa:5313	19	1963	0.0065116298361454	0.674	246.285370009737	0.507	0.708644346680532
1365	1365	hsa:5585	4	1302	-0.0153664460237247	0.234	225.286952288218	0.196	0.187220277864759
1366	1366	hsa:5586	12	1926	-0.0251911601133941	0.103	309.207838364168	0.475	0.196554561511872
1367	1367	hsa:29941	19	1957	-0.0260783275956542	0.083	248.17670399221	0.497	0.172762484947855
1368	1368	hsa:5319	2	224	0.0350933495043525	0.741	39.4539435248296	0.071	0.207541454056585
1369	1369	hsa:100137049	18	1957	-0.0215403775660624	0.137	365.238607594937	0.518	0.258710412831988
1370	1370	hsa:5322	4	1553	-0.0254638924853917	0.119	191.954040895813	0.466	0.215838138139541
1371	1371	hsa:5327	4	860	-0.0372065211257993	0.112	113.620423563778	0.037	0.0268783725995594
1372	1372	hsa:5328	3	818	0.00820344799054446	0.612	116.158958130477	0.001	0.0051400523045766
1373	1373	hsa:5329	19	1959	-0.0351368315413471	0.053	304.925973709834	0.476	0.11806201433468
1374	1374	hsa:5331	19	1957	-0.0225211302929853	0.154	216.01864654333	0.483	0.267666699117782
1375	1375	hsa:5333	3	964	-0.039748137149085	0.065	171.937804284323	0.243	0.0813136368374802
1376	1376	hsa:113026	2	271	0.0859439044645458	0.949	53.1812804284323	0.045	0.177372624007586
1377	1377	hsa:5335	12	1927	-0.0320844424345882	0.058	229.551217137293	0.393	0.108983993382895
1378	1378	hsa:5336	3	1137	-0.0459026898309036	0.029	135.099659201558	0.837	0.114529496429214
1379	1379	hsa:5337	5	1726	-0.0376851931981502	0.035	232.037779941577	0.182	0.0385777125058657
1380	1380	hsa:5338	5	1726	-0.0385923495495908	0.028	222.057619279455	0.379	0.0588517095708029
1381	1381	hsa:23646	19	1959	-0.0181673738081354	0.18	225.105038948393	0.509	0.310601483365767
1382	1382	hsa:5340	3	391	-0.0762316598347141	0.042	54.4165287244401	0.251	0.0585332743017889
1383	1383	hsa:10769	4	1137	-0.00875397555756894	0.343	144.209931840312	0.028	0.0542201080683846
1384	1384	hsa:1263	4	1302	-0.0327563609790586	0.066	166.260929892892	0.592	0.165757067202136
1385	1385	hsa:10733	5	1612	-0.0192699800226049	0.185	298.382716650438	0.2	0.158982982554503
1386	1386	hsa:5352	4	414	0.0669975772569432	0.955	62.802458617332	0.011	0.0583647709389178
1387	1387	hsa:8985	3	66	-0.0600481457096497	0.292	8.81333982473223	0.205	0.228410602044737
1388	1388	hsa:5360	19	1957	-0.00972285628657912	0.326	218.394376825706	0.448	0.427018055207978
1389	1389	hsa:5361	2	92	-0.150436006980409	0.057	11.0370496592016	0.809	0.187987039783434
1390	1390	hsa:5362	2	92	-0.153400263275589	0.051	13.8833252190847	0.046	0.0165511321184495
1391	1391	hsa:55558	4	1154	-0.0322003917122838	0.096	152.605306718598	0.1	0.0542015249328802
1392	1392	hsa:5364	4	1112	-0.00649040067266733	0.423	190.168451801363	0.259	0.351821524423503
1393	1393	hsa:5365	19	1957	-0.0133187162801475	0.278	316.659907497566	0.51	0.418744212716766
1394	1394	hsa:5366	19	1957	-0.0279096336676079	0.069	290.4852969815	0.553	0.162779519200237
1395	1395	hsa:5371	5	1420	-0.0514254350690041	0.011	229.683641674781	0.037	0.00358432583061633
1396	1396	hsa:5372	2	30	-0.32496957100676	0.016	3.82943037974684	0.487	0.0456194928969057
1397	1397	hsa:5373	2	30	-0.32496957100676	0.012	3.2763388510224	0.305	0.024193669201542
1398	1398	hsa:10654	6	1298	-0.0445336513898374	0.019	226.502994157741	0.4	0.0446850134408429
1399	1399	hsa:5409	5	878	-0.0418598335823694	0.06	115.823271665044	0.644	0.164353975298805
1400	1400	hsa:5411	6	35	-0.20355672897076	0.068	6.2534323271665	0.224	0.0789681227918134
1401	1401	hsa:5424	2	107	0.0981456194715458	0.894	22.8949123661149	0.002	0.0131000637927887
1402	1402	hsa:10714	2	107	0.0981456194715458	0.896	19.0697419668939	0.000999000999000999	0.00717746094126763
1403	1403	hsa:57804	5	1567	-0.0158724355077964	0.215	188.191309639727	0.408	0.301195861778535
1404	1404	hsa:5426	2	107	0.0981456194715458	0.894	17.6256085686465	0.007	0.0380104326179164
1405	1405	hsa:5427	2	107	0.0981456194715458	0.894	23.4238558909445	0.002	0.0131000637927887
1406	1406	hsa:56655	18	1957	-0.0102356735166755	0.291	192.270180136319	0.484	0.416912660182821
1407	1407	hsa:25885	19	1959	0.00137736788075212	0.562	257.957935735151	0.477	0.620991334628912
1408	1408	hsa:84172	1	20	NA	1	3.50428432327167	0.106	0.343897515596227
1409	1409	hsa:9533	1	20	NA	1	2.89031158714703	0.003	0.0204274289709421
1410	1410	hsa:51082	3	421	0.00759939939741449	0.575	71.0789191820837	0.402	0.569712730258848
1411	1411	hsa:5430	1	20	NA	1	2.84902629016553	0.151	0.436461791767249
1412	1412	hsa:5431	3	421	0.00518140868005534	0.549	53.156694255112	0.489	0.621500537908643
1413	1413	hsa:5432	3	421	0.00943016379770071	0.59	71.7002434274586	0.241	0.419544546742126
1414	1414	hsa:5433	3	421	0.00442146874031389	0.548	50.6269474196689	0.056	0.137601419311667
1415	1415	hsa:5435	2	119	0.160923388490103	0.98	18.1358568646543	0.119	0.367217078595599
1416	1416	hsa:5436	20	1963	0.00356636651308558	0.606	313.244961051607	0.497	0.662612611664633
1417	1417	hsa:5437	3	421	0.00431784056671278	0.545	35.5240506329114	0.432	0.575956677775401
1418	1418	hsa:5438	12	1927	0.00574014410657407	0.637	369.929333008763	0.431	0.629435460715333
1419	1419	hsa:5439	2	119	0.160923388490103	0.981	13.8663583252191	0.036	0.15339219105254
1420	1420	hsa:5440	2	119	0.160923388490103	0.979	17.2341285296982	0.178	0.478731758720319
1421	1421	hsa:5441	3	421	0.0076684848464819	0.571	60.0039678675755	0.212	0.376657543733815
1422	1422	hsa:10623	3	421	0.00373061424963984	0.537	66.9741723466407	0.081	0.179862848742133
1423	1423	hsa:661	3	421	0.00846296751075705	0.574	41.2826679649464	0.314	0.489068254842036
1424	1424	hsa:55718	5	1650	0.00560906119156423	0.603	197.805209347614	0.337	0.527029848170516
1425	1425	hsa:10621	3	421	0.00645948948780232	0.562	43.4562560856865	0.419	0.57601163407762
1426	1426	hsa:171568	3	421	0.00373061424963984	0.535	87.2527994157741	0.105	0.217918748416661
1427	1427	hsa:51728	3	421	0.00632131858966751	0.564	49.4672103213243	0.369	0.534787290305384
1428	1428	hsa:8611	3	324	0.029378030298351	0.746	47.163729308666	0.147	0.352053661706604
1429	1429	hsa:8613	3	324	0.0198417063271585	0.677	50.233106134372	0.053	0.155276727236787
1430	1430	hsa:8612	4	1079	-0.00404390115081899	0.44	129.895277507303	0.453	0.520792007394
1431	1431	hsa:5465	12	1920	-0.00447134197936635	0.419	211.027969814995	0.366	0.440893716841881
1432	1432	hsa:5467	2	85	0.078035627192429	0.823	15.3937195715677	0.006	0.0311627051572361
1433	1433	hsa:5468	3	443	0.0346808264545732	0.839	89.3844693281402	0.125	0.341366668726176
1434	1434	hsa:10105	3	235	-0.10935412665723	0.021	22.2309152872444	0.675	0.074507704211296
1435	1435	hsa:5494	20	1959	-0.0291023693479466	0.07	315.594328140214	0.493	0.150688126956011
1436	1436	hsa:5495	5	1445	-0.0345373078409373	0.059	268.571640701071	0.146	0.0495681129651048
1437	1437	hsa:8493	20	1959	-0.0285343760811709	0.062	392.496348588121	0.513	0.141476279024366
1438	1438	hsa:5498	9	90	-0.0398070073488377	0.317	11.1582035053554	0.853	0.62404474142461
1439	1439	hsa:5499	1	36	NA	1	6.26767283349562	0.07	0.256148202585295
1440	1440	hsa:5501	3	925	0.00740011112163268	0.639	121.943792599805	0.094	0.228990291826211
1441	1441	hsa:4659	2	28	-0.172235022565785	0.154	3.9317429406037	0.484	0.268066715167892
1442	1442	hsa:4660	20	1959	-0.0169191379807122	0.205	324.794011684518	0.487	0.32987844655913
1443	1443	hsa:54776	2	28	-0.148478467729125	0.18	3.46114897760467	0.3	0.211613646550565
1444	1444	hsa:94274	20	1959	-0.0124679700258244	0.29	196.355087633885	0.45	0.39624785781463
1445	1445	hsa:23645	3	372	-0.04372187690883	0.153	41.5882667964947	0.314	0.19388212177718
1446	1446	hsa:5502	3	879	0.046436037692257	0.94	100.642916260954	0.086	0.284175508960353
1447	1447	hsa:79660	2	101	0.00722263850495634	0.549	11.859688412853	0.072	0.167232927786756
1448	1448	hsa:5507	8	1873	-0.0021630909455442	0.476	240.47470788705	0.196	0.31459206363989
1449	1449	hsa:5518	10	1924	-0.0152560398125013	0.243	272.762366114898	0.438	0.344870661558855
1450	1450	hsa:5519	20	1963	-0.014894267055657	0.247	215.463266796495	0.511	0.387454967843662
1451	1451	hsa:5520	20	1963	-0.0193014025775917	0.183	301.695691333982	0.508	0.313803975505155
1452	1452	hsa:5521	3	953	0.0111596884232598	0.655	153.146445959104	0.083	0.212677767255555
1453	1453	hsa:5522	1	25	NA	1	3.07838364167478	0.024	0.113512834767221
1454	1454	hsa:55844	18	1957	-0.0200192271583778	0.171	289.223466407011	0.512	0.300786855100508
1455	1455	hsa:5526	1	17	NA	1	3.72392891918208	0.000999000999000999	0.00790085392538984
1456	1456	hsa:5527	19	1959	-0.0147291634123123	0.228	226.656158714703	0.488	0.355583001344506
1457	1457	hsa:5528	1	17	NA	1	3.00781402142162	0.115	0.363724662321172
1458	1458	hsa:5529	5	1688	-0.00993774686886036	0.301	282.985710808179	0.346	0.339720244270049
1459	1459	hsa:5530	2	187	0.00539415375548627	0.49	29.317259006816	0.12	0.22541646933576
1460	1460	hsa:5532	12	1926	-0.0191298434801989	0.168	282.730136319377	0.513	0.297444316886505
1461	1461	hsa:5533	3	796	0.0189249160110621	0.756	124.4070593963	0.113	0.295587830684549
1462	1462	hsa:5534	20	1959	-0.0197616435966309	0.157	276.137755598832	0.504	0.279851086405045
1463	1463	hsa:5536	19	1957	-0.0190873898587015	0.154	315.538656280428	0.554	0.295312228121228
1464	1464	hsa:5538	5	128	-0.144265892316588	0.019	19.9504381694255	0.969	0.091959391067726
1465	1465	hsa:9374	5	128	-0.15571006165901	0.014	15.3397517039922	0.482	0.0404779395032857
1466	1466	hsa:11108	4	963	-0.0309672667174713	0.112	174.473466407011	0.369	0.173007895281757
1467	1467	hsa:10113	10	98	-0.050035112157263	0.265	17.0549415774099	0.135	0.15492385048788
1468	1468	hsa:166336	3	201	0.0257015310782473	0.674	40.3011197663096	0.168	0.359887130264799
1469	1469	hsa:5557	2	95	0.15074361328216	0.967	18.5050632911392	0.013	0.0675862555651765
1470	1470	hsa:5562	4	1480	-0.0184121231081666	0.174	176.10747322298	0.263	0.186905792730387
1471	1471	hsa:5563	4	1480	-0.0197118581929631	0.154	252.92753164557	0.392	0.229838851916211
1472	1472	hsa:5564	2	147	-0.0154741141160518	0.415	20.0842989289192	0.265	0.352745055736915
1473	1473	hsa:5565	2	147	-0.0154741141160518	0.414	18.2703018500487	0.038	0.0810521831328586
1474	1474	hsa:5566	20	1963	-0.0129444899271579	0.271	318.456864654333	0.5	0.406335183038753
1475	1475	hsa:5567	18	1957	-0.0136275867600729	0.25	259.932083739046	0.504	0.387005644875863
1476	1476	hsa:5571	18	1959	-0.0149243109976753	0.231	244.774780915287	0.499	0.364306147380666
1477	1477	hsa:51422	4	1441	-0.0131482023178087	0.274	225.740335929893	0.118	0.143285654146138
1478	1478	hsa:5575	3	214	-0.0388897387273005	0.285	39.9445228821811	0.033	0.0532935624416351
1479	1479	hsa:5576	2	19	0.104918596715284	0.717	3.95460077896787	0.061	0.18061460303603
1480	1480	hsa:5578	4	1656	-0.0295422857325941	0.079	164.88106134372	0.466	0.158369302505474
1481	1481	hsa:5580	3	1119	-0.00554622682590565	0.439	153.927288218111	0.064	0.128458510016731
1482	1482	hsa:5590	2	314	0.0497593163031097	0.862	45.4095910418695	0.021	0.0907223880430458
1483	1483	hsa:5591	21	1963	-0.0275848586879167	0.075	277.803870496592	0.509	0.162838303784221
1484	1484	hsa:5618	4	1413	-0.0676555354886258	0.002	194.927848101266	0.183	0.00326211306419003
1485	1485	hsa:5621	2	97	-0.050174976738651	0.29	14.5605404089581	0.117	0.148730651907311
1486	1486	hsa:5624	8	1862	-0.0030560419542283	0.466	262.963242453749	0.259	0.375901084279016
1487	1487	hsa:221823	3	113	-0.0960499385770912	0.109	13.9801606621227	0.931	0.333653148972126
1488	1488	hsa:5634	3	113	-0.101345925165302	0.091	15.4329357351509	0.896	0.285923158618493
1489	1489	hsa:5663	21	1963	-0.0108885174924069	0.302	275.500876338851	0.504	0.438740666935425
1490	1490	hsa:5664	1	4	NA	1	0.849707887049659	0.074	0.26667307374757
1491	1491	hsa:5720	2	44	NA	1	8.60949367088608	0.001	0.00790775527898214
1492	1492	hsa:10197	5	1528	-0.051726937634175	0.009	207.478724440117	0.884	0.0464139428715317
1493	1493	hsa:9791	21	1963	-0.0251969568933286	0.092	264.452166504382	0.486	0.183655137218843
1494	1494	hsa:81490	21	1963	-0.024569367432805	0.098	246.773661148978	0.492	0.194410015316832
1495	1495	hsa:5731	13	1925	-0.00867010114297249	0.342	226.80593962999	0.5	0.473001684543991
1496	1496	hsa:5734	13	1925	-0.0110513162564745	0.299	238.093889970789	0.41	0.379895355431455
1497	1497	hsa:80142	2	22	-0.215365246126974	0.206	2.76139240506329	0.378	0.276644773391749
1498	1498	hsa:5739	2	33	-0.107705054606916	0.314	6.50216650438169	0.002	0.00525822540585954
1499	1499	hsa:5747	1	74	NA	1	12.8791382667965	0.000999000999000999	0.00790085392538984
1500	1500	hsa:2185	2	235	-0.104734583438257	0.03	32.024464459591	0.006	0.00173205966727333
1501	1501	hsa:5770	4	1266	-0.00307422948213569	0.442	232.20240993184	0.321	0.418943430864206
1502	1502	hsa:5777	5	1722	-0.0500219576898522	0.016	275.225097370983	0.561	0.0512816915494913
1503	1503	hsa:5778	4	1381	-0.0456593225003706	0.03	174.944449853944	0.209	0.0380713078555949
1504	1504	hsa:5788	2	44	-0.283795023605659	0.003	7.61874391431354	0.142	0.00373221633618203
1505	1505	hsa:5792	4	1274	-0.0181197329510991	0.216	239.454333008763	0.428	0.31257676064395
1506	1506	hsa:5795	5	1267	-0.0516466161836629	0.014	252.522054527751	0.318	0.0285569170164725
1507	1507	hsa:5805	8	310	-0.0670086829612372	0.073	52.2172833495618	0.361	0.122177071245503
1508	1508	hsa:5817	5	1012	-0.0627861372863367	0.027	120.261733203505	0.458	0.0666874205440207
1509	1509	hsa:5818	1	6	NA	1	1.60798442064265	0.02	0.0982404601085629
1510	1510	hsa:5819	4	1155	-0.0462894758681499	0.046	167.663023369036	0.772	0.154046958321827
1511	1511	hsa:25945	4	1155	-0.0469165248697599	0.044	171.176217137293	0.832	0.157688538393894
1512	1512	hsa:81607	4	1155	-0.0494306277280924	0.037	182.575876338851	0.12	0.0284919280072688
1513	1513	hsa:5829	1	22	NA	1	5.15172833495618	0.002	0.0144292161968444
1514	1514	hsa:29108	5	1447	-0.0433273729932365	0.03	185.321299902629	0.083	0.0174187266955787
1515	1515	hsa:65263	4	162	-0.0494449825920484	0.221	24.5359785783836	0.245	0.212036673877353
1516	1516	hsa:5836	1	12	NA	1	2.24483933787731	0.137	0.4093250863821
1517	1517	hsa:5837	3	417	0.0239255722016724	0.726	48.4062317429406	0.22	0.452699666246838
1518	1518	hsa:23475	1	4	NA	1	0.967039922103213	0.062	0.234398495424097
1519	1519	hsa:8766	6	1704	-0.0260164396593969	0.102	258.317283349562	0.477	0.19573607608198
1520	1520	hsa:9230	5	154	-0.0895398536880668	0.088	19.9808422590068	0.197	0.0876329601756727
1521	1521	hsa:9727	2	5	-0.774596669241483	0.09	0.842599805258033	0.235	0.10270684014931
1522	1522	hsa:26056	4	154	-0.102091953898979	0.053	19.4943037974684	0.041	0.0154970680133592
1523	1523	hsa:51715	4	31	-0.310655832097455	0.015	3.82203018500487	0.716	0.0594327992395412
1524	1524	hsa:5868	5	1481	-0.0297120837670582	0.076	266.906718597858	0.464	0.153218294954488
1525	1525	hsa:5869	13	1924	-0.0373857070026557	0.028	348.930306718598	0.472	0.0703927384540817
1526	1526	hsa:9135	6	1481	-0.029300747665002	0.077	244.43941090555	0.424	0.144368531437326
1527	1527	hsa:5879	18	1957	-0.0128687923628389	0.273	239.922930866602	0.523	0.420692226653142
1528	1528	hsa:5880	3	1077	0.00128695790763475	0.535	194.003505355404	0.042	0.107756552111877
1529	1529	hsa:5881	18	1957	-0.00889228069559976	0.348	314.397565725414	0.478	0.464714791272845
1530	1530	hsa:5889	6	188	-0.118106830312177	0.027	31.57852969815	0.282	0.0447533150524602
1531	1531	hsa:8480	7	98	-0.0483572124576137	0.269	13.6372444011685	0.242	0.24293671681569
1532	1532	hsa:5894	18	1957	-0.0256258139808945	0.106	332.675754625122	0.521	0.215178246856831
1533	1533	hsa:5899	19	1959	-0.0314088945669478	0.052	295.92105647517	0.497	0.120321311562569
1534	1534	hsa:5900	2	154	-0.108910277779507	0.051	17.9887779941577	0.868	0.182273189445938
1535	1535	hsa:10266	2	33	-0.107705054606916	0.317	4.86170886075949	0.006	0.0138177433968617
1536	1536	hsa:5901	3	13	-0.308166775680683	0.111	2.86319376825706	0.005	0.00471558105654091
1537	1537	hsa:5903	22	1963	-0.0286752853176962	0.086	212.443670886076	0.488	0.175042142814633
1538	1538	hsa:5905	6	869	-0.00462820512817762	0.422	102.655720545278	0.081	0.149582349242943
1539	1539	hsa:2889	3	608	-0.0504985738052951	0.076	119.668427458617	0.007	0.00454267728050724
1540	1540	hsa:9693	2	89	-0.0693312749953679	0.208	13.7986368062317	0.021	0.0281013097770767
1541	1541	hsa:9771	19	1957	-0.0300818487732584	0.081	244.516480038948	0.533	0.178845878518806
1542	1542	hsa:51735	3	439	-0.0160094006280072	0.339	66.6956426484908	0.006	0.0146402254960776
1543	1543	hsa:5914	21	1963	-0.0438845776252832	0.008	313.57740993184	0.479	0.0251546597811233
1544	1544	hsa:5921	4	1213	-0.0434386864101319	0.034	141.906158714703	0.889	0.135988369867337
1545	1545	hsa:5922	2	104	-0.143128054940882	0.041	19.9218597857838	0.137	0.0347240556450306
1546	1546	hsa:22821	3	557	0.00966852490493997	0.631	80.7966893865628	0.002	0.00968592258375725
1547	1547	hsa:9462	2	67	-0.112534230181134	0.126	9.14152872444012	0.044	0.0343452963107721
1548	1548	hsa:51655	4	1408	-0.0245547582483196	0.132	157.347224926972	0.006	0.00644763173959068
1549	1549	hsa:25780	5	1652	-0.028736912943606	0.094	256.572663096397	0.261	0.115498598167628
1550	1550	hsa:115727	1	17	NA	1	3.08351996105161	0.01	0.0560517018598809
1551	1551	hsa:11186	2	124	-0.103579643902867	0.076	23.9687439143135	0.047	0.0236988969882373
1552	1552	hsa:83593	2	154	-0.154738860013458	0.008	22.8462268743914	0.001	0.000101888552130275
1553	1553	hsa:5925	2	130	-0.163284709153342	0.016	21.7582278481013	0.126	0.0145285860964064
1554	1554	hsa:5934	2	92	-0.161939388216433	0.03	16.1713972736125	0.126	0.0248649581981454
1555	1555	hsa:9978	2	138	-0.0663910519814843	0.171	25.1664070107108	0.036	0.0374920595558619
1556	1556	hsa:9986	4	75	-0.0568654214266468	0.275	14.9512901655307	0.027	0.0438290517626283
1557	1557	hsa:25898	19	1957	-0.0280092337877563	0.071	304.315384615385	0.519	0.15848485157055
1558	1558	hsa:157506	4	389	-0.0396221986781233	0.197	36.8863680623174	0.396	0.277012234913217
1559	1559	hsa:51109	4	389	-0.0412219682022166	0.187	42.0808422590068	0.08	0.0778275345842796
1560	1560	hsa:5959	4	389	-0.0393198292531475	0.192	40.8604186952288	0.127	0.114941984377669
1561	1561	hsa:5962	3	384	-0.065173312364679	0.07	47.9484420642649	0.043	0.0204855037526663
1562	1562	hsa:5966	6	1466	-0.0460060534230943	0.022	217.1961781889	0.713	0.0808611211282304
1563	1563	hsa:5970	3	1200	-0.0210468423922795	0.177	117.359980525803	0.094	0.0847883468254379
1564	1564	hsa:5971	2	50	-0.126608390721599	0.146	7.54352482960078	0.003	0.00382518174164347
1565	1565	hsa:5973	2	15	-0.358834090858024	0.069	1.77602239532619	0.451	0.139099960598744
1566	1566	hsa:5978	22	1959	-0.00915305019851567	0.343	242.143987341772	0.525	0.488792311315823
1567	1567	hsa:5979	3	790	-0.0315670948437401	0.142	100.201874391431	0.312	0.182385404567372
1568	1568	hsa:5986	2	17	0.342997170285018	1	2.4370253164557	0.078	0.276981623278819
1569	1569	hsa:5993	2	16	-0.578530007602864	0.031	2.97127555988315	0.004	0.00123940839505255
1570	1570	hsa:8625	4	525	-0.0724217743835375	0.032	70.2692551119766	0.474	0.078700189314065
1571	1571	hsa:5994	2	16	-0.578530007602864	0.031	2.76638266796495	0.509	0.0812472597413964
1572	1572	hsa:23179	2	70	-0.0982016996669959	0.162	11.3293573515093	0.019	0.0208795367996944
1573	1573	hsa:5863	4	1201	-0.0385439806606321	0.06	235.994133398247	0.174	0.0580684356717486
1574	1574	hsa:10636	5	1616	-0.0486556954682577	0.028	213.034639727361	0.313	0.0502799694409295
1575	1575	hsa:5998	5	1605	-0.0368269344111495	0.031	190.790749756573	0.238	0.0435984662716209
1576	1576	hsa:6010	2	69	0.0322794466927691	0.588	10.2691090555015	0.006	0.023450701168875
1577	1577	hsa:29984	5	1155	-0.0214213329373747	0.225	143.037122687439	0.178	0.168915945548984
1578	1578	hsa:391	3	843	0.0297825263091828	0.862	143.563096397274	0.001	0.00694449205765311
1579	1579	hsa:83547	7	1675	-0.0335834557667689	0.046	223.261538461538	0.234	0.0595415831684085
1580	1580	hsa:9610	4	1244	-0.0461539439314718	0.026	209.994157740993	0.516	0.0712564981258519
1581	1581	hsa:83732	9	30	0.184214847412805	0.916	5.33325219084713	0.007	0.0387899328916338
1582	1582	hsa:8737	5	1592	-0.0173891967271681	0.218	279.538266796495	0.277	0.22988938056302
1583	1583	hsa:8767	4	1436	-0.0429175311657385	0.028	148.210321324245	0.831	0.11077141505326
1584	1584	hsa:10193	4	1259	-0.0307458448176583	0.093	161.409274586173	0.308	0.130410726356952
1585	1585	hsa:6091	3	45	-0.0347446958559248	0.383	7.25752190847128	0.125	0.193374872682169
1586	1586	hsa:64221	22	1959	-0.0246723167420505	0.127	206.180671859786	0.489	0.234684813867059
1587	1587	hsa:9475	18	1957	-0.0309798738529631	0.066	223.251752677702	0.529	0.152045839847753
1588	1588	hsa:6095	3	436	-0.0657796546076385	0.047	56.0426484907498	0.69	0.143621812161438
1589	1589	hsa:6096	3	59	-0.140707608667867	0.088	11.7134371957157	0.149	0.0699423901610325
1590	1590	hsa:6097	2	71	-0.157303991384854	0.053	8.96506815968841	0.454	0.113743996242574
1591	1591	hsa:6117	5	61	-0.284917977248407	0.003	12.0664313534567	0.026	0.000815786535039426
1592	1592	hsa:6118	5	61	-0.338507565445599	0.000999000999000999	10.8453505355404	0.021	0.000246964775256796
1593	1593	hsa:6119	5	61	-0.274200059608968	0.003	14.2573515092502	0.003	0.000113564573825652
1594	1594	hsa:6120	4	196	-0.0478900044842014	0.185	28.1447906523856	0.509	0.316649277943725
1595	1595	hsa:22934	4	403	-0.0305486043540589	0.224	51.793305744888	0.292	0.243782856916829
1596	1596	hsa:6184	2	12	-0.165144564768954	0.31	3.55270204479065	0.000999000999000999	0.00281196873711652
1597	1597	hsa:6185	8	42	-0.158066846302631	0.079	7.56484907497566	0.001	0.000825238953734283
1598	1598	hsa:6195	11	1919	-0.0352481634720467	0.032	206.29223466407	0.422	0.0716356051825997
1599	1599	hsa:6196	4	1432	-0.036584260055677	0.048	166.493889970789	0.082	0.0257319554199818
1600	1600	hsa:6197	20	1963	-0.0359858670425009	0.029	214.320277507303	0.506	0.0766229038332219
1601	1601	hsa:8986	4	1397	-0.050767630279009	0.015	204.172200584226	0.409	0.0373851268070262
1602	1602	hsa:6199	19	1959	-0.0162351786195856	0.209	293.11482473223	0.455	0.318842017763878
1603	1603	hsa:9125	1	1	NA	1	0.547370983446933	0.01	0.0560517018598809
1604	1604	hsa:10670	20	1957	-0.0305958612478293	0.061	259.739435248296	0.457	0.127675358224853
1605	1605	hsa:10325	22	1963	-0.0297634029878996	0.062	384.556012658228	0.482	0.134789751647229
1606	1606	hsa:64121	22	1963	-0.0298013816502974	0.065	294.900803310613	0.509	0.145861021358177
1607	1607	hsa:58528	4	137	0.083254865949388	0.886	22.5855404089581	0.011	0.0548787351686298
1608	1608	hsa:6237	3	1035	-0.0310176908060242	0.094	144.096957156767	0.000999000999000999	0.000964717518428143
1609	1609	hsa:6240	2	96	0.210669192299906	0.998	19.8898734177215	0.007	0.0416634360683261
1610	1610	hsa:6241	2	139	0.165307534763048	0.994	26.7214703018501	0.000999000999000999	0.0078594247897412
1611	1611	hsa:80230	8	1482	-0.0296042832374137	0.073	178.269011684518	0.404	0.133411079956304
1612	1612	hsa:861	21	1963	-0.0248901884798276	0.079	330.652263875365	0.513	0.170447924088451
1613	1613	hsa:8607	19	1957	-0.00457507111665569	0.448	351.716309639727	0.518	0.571049650816566
1614	1614	hsa:6257	2	201	0.0188528047243775	0.622	28.9466407010711	0.136	0.293527098700137
1615	1615	hsa:6258	20	1963	-0.00511716878530736	0.431	320.147711781889	0.517	0.557370454107868
1616	1616	hsa:6261	2	71	-0.0580598858052569	0.281	9.75474683544304	0.536	0.435735360518136
1617	1617	hsa:6262	2	167	-0.0642923645391305	0.168	21.538023369036	0.376	0.237635327264889
1618	1618	hsa:1757	3	83	-0.0904859137498237	0.152	10.9979552093476	0.118	0.0900556769213322
1619	1619	hsa:6301	9	585	-0.031711953523449	0.164	71.4169425511198	0.612	0.331105184322702
1620	1620	hsa:54938	9	585	-0.0305816625671662	0.17	74.3998539435248	0.3	0.202772411959148
1621	1621	hsa:112483	5	966	-0.0230960027657542	0.192	131.912609542356	0.241	0.188475954977174
1622	1622	hsa:60485	14	1925	-0.0177530291306296	0.21	311.614556962025	0.457	0.320896773500759
1623	1623	hsa:85477	4	923	-0.0198496851486992	0.226	101.183958130477	0.029	0.0395054129419359
1624	1624	hsa:51540	6	585	-0.0283599003620896	0.187	82.9205696202532	0.429	0.28262121851448
1625	1625	hsa:6324	19	1957	-0.0223781450177857	0.138	300.144547224927	0.506	0.255690598371367
1626	1626	hsa:6338	19	1957	-0.0260907415703332	0.101	324.319790652386	0.507	0.203388009874893
1627	1627	hsa:6342	2	47	-0.0461742857741705	0.333	10.3425024342746	0.029	0.0544661776023405
1628	1628	hsa:23513	4	926	0.0342969368310983	0.902	120.523831548199	0.071	0.240043259373818
1629	1629	hsa:6382	1	19	NA	1	5.27110516066212	0.001	0.00790775527898214
1630	1630	hsa:6385	2	157	-0.214948202193429	0.01	18.8065481986368	0.009	0.000928413079887061
1631	1631	hsa:6390	3	20	0.213332688337518	0.872	4.6373417721519	0.01	0.0500714262780541
1632	1632	hsa:113675	4	192	-0.132163877317433	0.009	20.5199123661149	0.916	0.0478009347139241
1633	1633	hsa:10484	9	98	-0.069604405165353	0.191	12.4266309639727	0.941	0.488202235176408
1634	1634	hsa:10483	5	21	0.0930337896346085	0.718	4.05963972736125	0.011	0.0461333688658974
1635	1635	hsa:10802	9	98	-0.0749214083377063	0.17	17.3998052580331	0.228	0.164744205228353
1636	1636	hsa:10427	5	21	0.103978941356327	0.744	4.42383154819864	0.059	0.181111914549681
1637	1637	hsa:9632	9	98	-0.0604204905949245	0.228	13.2397517039922	0.6	0.408927385454976
1638	1638	hsa:9871	6	29	0.063123481361201	0.679	5.50223953261928	0.01	0.0406877464510243
1639	1639	hsa:81929	8	98	-0.0885293624674693	0.125	9.42986854917235	0.94	0.369104741084256
1640	1640	hsa:6400	5	64	-0.0764681073798563	0.219	8.48622200584226	0.017	0.0245465784772729
1641	1641	hsa:6402	5	914	-0.0491964585375077	0.076	148.812609542356	0.054	0.0266587351742505
1642	1642	hsa:6404	6	1447	-0.0348982973729365	0.07	193.62259006816	0.101	0.0420798962294507
1643	1643	hsa:7869	3	5	-0.597614304667197	0.157	1.05557448880234	0.005	0.00639761406954277
1644	1644	hsa:10512	4	7	-0.370479286817474	0.184	1.21085686465433	0.087	0.0821957442406649
1645	1645	hsa:6405	2	4	-0.707106781186548	0.269	1.2013388510224	0.013	0.0232755068236904
1646	1646	hsa:64218	4	513	0.0864320134307972	0.994	82.8227361246349	0.055	0.213565083879333
1647	1647	hsa:54910	5	1112	-0.00901021303873416	0.377	200.133325219085	0.23	0.298732083400735
1648	1648	hsa:10507	5	1112	-0.00905813970383381	0.374	158.640944498539	0.136	0.202367504032524
1649	1649	hsa:10505	5	1112	-0.00893178758675292	0.378	145.695447906524	0.083	0.139983752523192
1650	1650	hsa:8482	4	1041	-0.0475881608966359	0.059	118.07923563778	0.086	0.0318831173995428
1651	1651	hsa:59343	1	3	NA	1	1.1067429406037	0.000999000999000999	0.00790085392538984
1652	1652	hsa:22928	6	585	-0.0327449977578403	0.155	72.7830574488802	0.053	0.0476617338283542
1653	1653	hsa:5265	4	391	-0.0864961386369822	0.023	59.5117818889971	0.134	0.0209026681027035
1654	1654	hsa:5104	5	1161	-0.0196212018146884	0.213	146.636197663096	0.448	0.319615546452559
1655	1655	hsa:1992	4	279	-0.0868357970749517	0.059	30.6202288218111	0.219	0.0691131547857916
1656	1656	hsa:5269	3	27	-0.10064684747952	0.309	4.00080331061344	0.054	0.0849848888229046
1657	1657	hsa:3053	2	8	-0.0714285714285714	0.504	1.38386075949367	0.093	0.190316012592781
1658	1658	hsa:5054	4	1387	0.00799638675190852	0.672	170.661246348588	0.011	0.0436671825347993
1659	1659	hsa:5345	4	391	-0.091296540986825	0.019	51.9602726387537	0.45	0.0492635951660862
1660	1660	hsa:27244	2	43	-0.0616187275448219	0.349	8.48179162609542	0.049	0.0866784421921735
1661	1661	hsa:83667	3	353	0.0178328701978319	0.643	44.0031158714703	0.000999000999000999	0.0053639209888116
1662	1662	hsa:143686	20	1959	-0.0283607874706498	0.064	303.033495618306	0.505	0.143244471545041
1663	1663	hsa:9869	2	13	0.0482804549585268	0.633	2.54201557935735	0.004	0.0176701843015409
1664	1664	hsa:83852	6	1137	-0.00751653129148477	0.366	138.319912366115	0.112	0.171935957457154
1665	1665	hsa:2810	2	77	-0.101741984470832	0.136	8.22502434274586	0.415	0.21868113445874
1666	1666	hsa:6423	2	30	-0.106432233147527	0.281	4.4996835443038	0.139	0.165714914499868
1667	1667	hsa:6425	1	17	NA	1	3.82069133398247	0.015	0.0779955761681989
1668	1668	hsa:151648	21	1963	-0.0136547145446556	0.268	279.412731256086	0.504	0.405479026972852
1669	1669	hsa:81537	3	219	0.0556196989661117	0.865	34.6104430379747	0.017	0.0767537431310847
1670	1670	hsa:130367	6	1757	-0.0237590453072407	0.112	205.141577409932	0.3	0.147612501523636
1671	1671	hsa:6448	6	640	-0.026478616605541	0.228	75.2621226874391	0.09	0.100268009908105
1672	1672	hsa:9047	4	1186	-0.0462659730134133	0.02	151.553651411879	0.219	0.0281664947091208
1673	1673	hsa:6452	22	1963	-0.0306427845403995	0.08	228.867307692308	0.505	0.170040589958207
1674	1674	hsa:6455	4	1259	-0.0298534984329293	0.099	140.747054527751	0.373	0.15874224136584
1675	1675	hsa:51100	4	1259	-0.0296830502470821	0.096	226.447224926972	0.421	0.170091929598213
1676	1676	hsa:56904	4	1259	-0.0302311581388258	0.094	204.120983446933	0.451	0.176390769203906
1677	1677	hsa:30011	4	1259	-0.0295326547889817	0.097	195.833252190847	0.895	0.298988764388866
1678	1678	hsa:50944	4	734	-0.0514527261968724	0.042	86.930282375852	0.322	0.071721685766302
1679	1679	hsa:22941	5	1341	-0.0303248835030711	0.109	222.343037974684	0.278	0.136254202413072
1680	1680	hsa:85358	4	734	-0.0561759911913434	0.031	77.6375365141188	0.069	0.0152883246397583
1681	1681	hsa:6464	4	1339	-0.0607444742606192	0.005	219.38276533593	0.306	0.011448205941674
1682	1682	hsa:6469	3	39	-0.194945992521801	0.089	5.61964459591042	0.248	0.106242367797306
1683	1683	hsa:6470	3	175	-0.0796539889725141	0.098	22.7260710808179	0.041	0.0261851895285842
1684	1684	hsa:6476	1	4	NA	1	0.692405063291139	0.173	0.476522217415794
1685	1685	hsa:25942	2	58	0.00755458549713887	0.491	10.6873417721519	0.004	0.0142051643436139
1686	1686	hsa:6494	11	1916	-0.0199460204273019	0.183	276.840652385589	0.402	0.265541797035921
1687	1687	hsa:26037	3	401	-0.0242141425524632	0.289	58.6817185978578	0.012	0.0231113665991814
1688	1688	hsa:57568	21	1963	-0.022660909104685	0.161	338.814922103213	0.476	0.273489999528322
1689	1689	hsa:10326	4	861	-0.0407744996310879	0.08	138.272297955209	0.002	0.00155845387883687
1690	1690	hsa:6502	2	52	-0.143898381631469	0.123	10.6855890944499	0.000999000999000999	0.00122930275870107
1691	1691	hsa:6558	2	133	-0.12910220243651	0.027	17.1426971762415	0.722	0.0962545208934904
1692	1692	hsa:291	22	1963	-0.0221040695555446	0.126	267.305282375852	0.506	0.23925662998688
1693	1693	hsa:376497	2	42	-0.0663418949080368	0.261	4.64588607594937	0.338	0.302406386301578
1694	1694	hsa:10999	21	1963	-0.00826648965991785	0.351	252.135564751704	0.506	0.484542498467455
1695	1695	hsa:10998	4	305	-0.00481640755527985	0.462	37.3027994157741	0.356	0.461346416558809
1696	1696	hsa:6514	5	1726	-0.0314915821353368	0.063	241.018403115871	0.703	0.182338651823123
1697	1697	hsa:9197	4	104	-0.0630504606673148	0.209	15.2076923076923	0.059	0.0665336228084779
1698	1698	hsa:6531	12	1926	-0.0251547406669344	0.087	261.505550146057	0.444	0.164314931828023
1699	1699	hsa:6541	4	121	-0.158940615187826	0.016	15.1443524829601	0.769	0.0664149109779567
1700	1700	hsa:6548	19	1957	-0.0206550200728332	0.151	294.027434274586	0.48	0.262699745858093
1701	1701	hsa:9353	7	1479	-0.0202621186141241	0.204	151.392794547225	0.21	0.177798125150967
1702	1702	hsa:9748	3	128	-0.00564273420352799	0.435	25.2870496592016	0.029	0.0677787386112562
1703	1703	hsa:4086	4	1389	-0.0388248745847116	0.036	182.764776046738	0.05	0.013175943505344
1704	1704	hsa:4087	19	1959	-0.0217478747838372	0.144	273.84759006816	0.509	0.26483671642974
1705	1705	hsa:4088	20	1963	-0.0216447583692487	0.129	373.810199610516	0.501	0.241653780262169
1706	1706	hsa:4089	4	1501	-0.016710541480886	0.209	218.8211781889	0.238	0.199013047963259
1707	1707	hsa:4090	1	7	NA	1	1.57081304771178	0.02	0.0982404601085629
1708	1708	hsa:4091	1	6	NA	1	1.47870009737098	0.011	0.0606084600680215
1709	1709	hsa:4092	21	1963	-0.0228819998247752	0.12	280.764897760467	0.536	0.240806660952447
1710	1710	hsa:4093	4	1389	-0.0381324610846344	0.035	145.074172346641	0.387	0.0718120385476636
1711	1711	hsa:6608	3	31	-0.342025045976858	0.009	5.60428432327167	0.355	0.0215540073707327
1712	1712	hsa:54498	2	36	-0.081092316028221	0.3	6.1225170399221	0.033	0.0555906831662318
1713	1713	hsa:6609	1	10	NA	1	1.89997565725414	0.092	0.311508936577845
1714	1714	hsa:6610	4	380	0.0304591680211808	0.778	64.9027020447907	0.003	0.0164784408531049
1715	1715	hsa:57154	4	1275	-0.0284004113461977	0.11	155.74082278481	0.206	0.108476910169842
1716	1716	hsa:6591	2	160	0.08034830870457	0.889	24.9822297955209	0.015	0.0709070372231777
1717	1717	hsa:8773	3	100	-0.154755190899884	0.024	18.4128042843233	0.416	0.055978006330073
1718	1718	hsa:6646	3	23	-0.164101146291029	0.177	5.63132911392405	0.002	0.00316695963027
1719	1719	hsa:8651	4	1359	-0.0517712610688147	0.006	224.606037000974	0.295	0.0129860930463416
1720	1720	hsa:9021	2	203	-0.0907114208519317	0.062	31.7543086660175	0.001	0.000662679322720989
1721	1721	hsa:122809	4	1359	-0.0542002546860698	0.005	201.807302823759	0.441	0.0156930462330337
1722	1722	hsa:6648	4	1137	-0.00583450249090762	0.403	157.895666991237	0.106	0.1774136167396
1723	1723	hsa:10580	12	1921	-0.0115504154488614	0.305	246.695155793574	0.39	0.372200740423636
1724	1724	hsa:6272	4	963	-0.0287441045966064	0.135	137.988315481986	0.896	0.376463247537999
1725	1725	hsa:6654	2	208	-0.228299349697405	0.000999000999000999	35.9964946445959	0.257	0.00237935117998437
1726	1726	hsa:6655	2	208	-0.227854755053399	0.000999000999000999	31.9655793573515	0.358	0.00319588390783117
1727	1727	hsa:50964	3	34	-0.00950024968171797	0.455	4.32276046738072	0.253	0.36397332950265
1728	1728	hsa:6657	12	1925	-0.0157595065963765	0.236	267.299148003895	0.458	0.3485632166751
1729	1729	hsa:6659	3	18	-0.314414072761266	0.097	2.49836903602726	0.273	0.122642191055411
1730	1730	hsa:6667	5	1565	-0.0235154740121966	0.145	266.111148977605	0.109	0.0813551142910365
1731	1731	hsa:166378	7	30	0.320551516180361	0.99	7.13115871470302	0.01	0.0555906831662318
1732	1732	hsa:8877	5	1713	-0.035527443462045	0.044	304.429065238559	0.542	0.112945437794317
1733	1733	hsa:56848	5	1713	-0.0368802742641852	0.041	228.698953261928	0.23	0.0534101920894357
1734	1734	hsa:6696	4	1192	-0.0512504322797039	0.029	138.599951314508	0.285	0.0479016716518161
1735	1735	hsa:200734	3	208	-0.205758923298487	0.000999000999000999	32.2952044790652	0.857	0.00690314967404849
1736	1736	hsa:10252	3	208	-0.204460076859991	0.000999000999000999	31.5420886075949	0.017	0.000203512531610489
1737	1737	hsa:10253	3	268	-0.145398389243396	0.005	44.5656280428432	0.192	0.0076306341825623
1738	1738	hsa:81848	3	208	-0.213984950742298	0.000999000999000999	33.5490506329114	0.193	0.00184204518960315
1739	1739	hsa:6709	4	387	0.0435969688625639	0.848	61.1599318403116	0.02	0.0861041841205677
1740	1740	hsa:10558	7	1747	-0.0285656726980191	0.074	257.24759006816	0.71	0.207332323192838
1741	1741	hsa:9517	7	1747	-0.030653191639801	0.056	169.646518987342	0.481	0.124290558460115
1742	1742	hsa:6713	7	821	-0.0129081932896415	0.327	141.684615384615	0.009	0.0200957628580377
1743	1743	hsa:6714	2	510	-0.0413832953148859	0.133	94.5069863680623	0.002	0.00245571579028257
1744	1744	hsa:6720	2	171	-0.0337831875576591	0.302	16.50070593963	0.015	0.028978561027877
1745	1745	hsa:6722	4	1139	-0.0511131243688598	0.022	140.12147030185	0.004	0.000909759289426775
1746	1746	hsa:57522	5	1479	-0.0208480814716962	0.195	159.621665043817	0.285	0.216187962598254
1747	1747	hsa:23380	5	1479	-0.0202471118461842	0.203	199.007594936709	0.279	0.219247082749416
1748	1748	hsa:6732	5	121	0.0688242250762236	0.793	21.7842745861733	0.135	0.346260036385021
1749	1749	hsa:6750	6	1605	-0.0342592047043788	0.043	222.48305744888	0.655	0.128704902194888
1750	1750	hsa:10274	3	17	-0.292619524226006	0.117	1.75834956183057	0.593	0.254499375655055
1751	1751	hsa:10735	13	1924	-0.0165844145316643	0.214	213.781888997079	0.488	0.340366772924507
1752	1752	hsa:8027	5	1456	-0.0629175659946773	0.003	227.681012658228	0.485	0.0109601503455119
1753	1753	hsa:10254	5	1456	-0.0607141499089443	0.003	254.518865628043	0.385	0.00896702144993467
1754	1754	hsa:6770	2	90	-0.140547916899285	0.066	17.9013388510224	0.254	0.0853039752460834
1755	1755	hsa:6772	1	43	NA	1	7.46983933787731	0.048	0.193754604867564
1756	1756	hsa:6773	2	196	-0.146366997651011	0.004	27.7976144109056	0.103	0.00362332872994928
1757	1757	hsa:6774	1	42	NA	1	8.42125121713729	0.02	0.0982404601085629
1758	1758	hsa:6776	2	263	-0.0864591587303729	0.055	45.0074245374878	0.087	0.0303477583807595
1759	1759	hsa:6777	2	263	-0.0863283581876643	0.053	36.1423807205453	0.002	0.00107611957516834
1760	1760	hsa:6794	5	1646	-0.0329112343003601	0.048	262.916699123661	0.477	0.109369453814024
1761	1761	hsa:6788	21	1963	-0.0077366733162605	0.383	244.118500486855	0.51	0.514316555795937
1762	1762	hsa:27148	21	1963	-0.00676327444844035	0.379	276.276217137293	0.479	0.491299643841949
1763	1763	hsa:6789	4	1275	-0.0410803701126448	0.043	167.253407984421	0.054	0.0164056878908303
1764	1764	hsa:3925	20	1963	-0.0340681455960474	0.055	364.648977604674	0.488	0.123943415191023
1765	1765	hsa:201254	4	70	-0.253508777893404	0.004	14.0822784810127	0.004	0.000192686749371592
1766	1766	hsa:412	3	251	-0.106977897937304	0.023	28.1857838364167	0.546	0.0675293561258725
1767	1767	hsa:8677	5	166	-0.108806493454218	0.041	19.0869036027264	0.352	0.0755992511796321
1768	1768	hsa:8675	5	166	-0.116345841032148	0.029	25.5365871470302	0.12	0.0231793159884812
1769	1769	hsa:10228	5	166	-0.111205376774469	0.048	25.2715676728335	0.227	0.060138941434249
1770	1770	hsa:6812	4	166	-0.123659161482643	0.025	31.263558909445	0.597	0.0776804104740743
1771	1771	hsa:51684	1	1	NA	1	0.296056475170399	0.061	0.231609766303338
1772	1772	hsa:6820	3	251	-0.130183515711123	0.005	28.0655793573515	0.936	0.0297856595511661
1773	1773	hsa:285362	3	43	0.101309723817406	0.801	10.0227361246349	0.000999000999000999	0.00650614379430013
1774	1774	hsa:6821	7	1819	-0.0122883373723451	0.279	234.76582278481	0.238	0.246486090060308
1775	1775	hsa:6839	19	1957	-0.0182534386552391	0.166	319.678967867575	0.487	0.284180539502385
1776	1776	hsa:79723	4	66	-0.0186242755027646	0.424	13.2768013631938	0.158	0.248083573213701
1777	1777	hsa:51111	21	1963	-0.0196116195501544	0.146	286.64858812074	0.497	0.26291490394898
1778	1778	hsa:84787	2	13	-0.0482804549585268	0.483	2.19953748782863	0.093	0.184297914054826
1779	1779	hsa:9900	5	1222	-0.0436983912635393	0.059	166.531937682571	0.604	0.154460639774986
1780	1780	hsa:6850	4	1428	-0.0369031461361598	0.055	223.123466407011	0.464	0.119134832779302
1781	1781	hsa:8189	12	1182	0.00915467575427434	0.617	133.938218111003	0.077	0.192261136854757
1782	1782	hsa:8867	3	787	-0.0694706150359522	0.01	86.1879990262902	0.509	0.0319676302124563
1783	1783	hsa:8871	3	787	-0.0688960121545326	0.01	76.2932570593963	0.517	0.0323894429926875
1784	1784	hsa:84447	5	64	-0.0614214702019063	0.275	8.87426971762415	0.001	0.00252965335158187
1785	1785	hsa:6870	3	221	-0.0181892128583224	0.345	26.061441090555	0.233	0.283029772149014
1786	1786	hsa:6880	13	1374	-0.00387516812022488	0.404	180.15253164557	0.105	0.17647294069205
1787	1787	hsa:10010	5	1469	-0.0481209782248125	0.014	244.060418695229	0.362	0.0318514120957398
1788	1788	hsa:6890	5	60	-0.123401343003908	0.206	12.6733933787731	0.000999000999000999	0.00195270587536324
1789	1789	hsa:6891	5	60	-0.125820977180455	0.218	11.7576436222006	0.000999000999000999	0.00205412514387693
1790	1790	hsa:6892	3	7	-0.723746864455746	0.056	2.84028724440117	0.000999000999000999	0.000603701167416069
1791	1791	hsa:80835	14	1928	-0.0152735335975247	0.205	291.97923563778	0.599	0.380325460636335
1792	1792	hsa:259287	4	561	0.0245407827413534	0.76	101.74788218111	0.002	0.0113833483150684
1793	1793	hsa:9882	11	1919	-0.0230249383649767	0.114	212.537779941577	0.369	0.175352771572953
1794	1794	hsa:90665	4	1167	0.0204379176085408	0.809	129.717210321324	0.128	0.338374941949671
1795	1795	hsa:6908	19	1957	-0.0293404802277425	0.057	229.141066212269	0.484	0.1266392484896
1796	1796	hsa:6929	4	1231	-0.000183005003006721	0.491	149.854698149951	0.216	0.344023182512732
1797	1797	hsa:6932	18	1957	-0.0148691642600391	0.221	210.558812074002	0.45	0.328990572217691
1798	1798	hsa:83439	2	183	-0.0651239917064295	0.151	28.1060856864654	0.54	0.285933185362933
1799	1799	hsa:6934	2	183	-0.0628489177603534	0.165	26.7234420642649	0.433	0.259976020453793
1800	1800	hsa:10312	7	1674	-0.0362078850964781	0.028	219.593281402142	0.423	0.0643832007413897
1801	1801	hsa:7003	2	104	-0.13286245959922	0.057	14.9465676728335	0.521	0.134132714549033
1802	1802	hsa:8463	2	104	-0.135425722485379	0.054	14.424464459591	0.45	0.114629877965846
1803	1803	hsa:7004	2	104	-0.131153617675115	0.056	13.8447663096397	0.365	0.0999569453389372
1804	1804	hsa:7023	4	1165	-0.0240780364760721	0.162	190.030866601753	0.198	0.14240612333179
1805	1805	hsa:7029	18	1957	-0.0303086246139802	0.058	269.044693281402	0.491	0.129820477744033
1806	1806	hsa:7035	5	462	-0.0189297950726128	0.336	53.5701071080818	0.028	0.0533075615046658
1807	1807	hsa:7037	2	82	-0.11788797594829	0.101	8.27278481012658	0.595	0.229071841855023
1808	1808	hsa:7038	12	1924	-0.0226113853779054	0.117	325.690043816943	0.5	0.224565618697543
1809	1809	hsa:7039	4	1301	-0.0293989379544744	0.086	232.756596884129	0.195	0.0853285053017755
1810	1810	hsa:7042	2	168	-0.0927359059989258	0.102	25.5482716650438	0.616	0.236706414360996
1811	1811	hsa:7046	4	1181	-0.000413111596622095	0.509	150.078042843233	0.159	0.284404348549271
1812	1812	hsa:7048	4	1327	-0.0356212071703482	0.065	172.976338851022	0.072	0.0297856595511661
1813	1813	hsa:7054	2	123	-0.20337999358482	0.005	19.7710321324245	0.132	0.00549335867714291
1814	1814	hsa:7057	3	832	-0.0706282261231071	0.019	116.477263875365	0.011	0.00197989384795389
1815	1815	hsa:7059	4	1236	-0.0337346711959228	0.119	220.112049659202	0.422	0.200439208762515
1816	1816	hsa:9984	5	29	-0.181244449976002	0.119	3.66489776046738	0.308	0.157834041455435
1817	1817	hsa:57187	9	100	-0.0778136313177299	0.159	16.2632424537488	0.111	0.0888993570495653
1818	1818	hsa:7067	20	1963	-0.0125330971599012	0.289	266.967843232717	0.481	0.413303866314103
1819	1819	hsa:7068	19	1959	-0.0222213972616374	0.121	229.365068159688	0.465	0.218177811870487
1820	1820	hsa:79178	2	39	NA	1	4.25547711781889	0.115	0.363724662321172
1821	1821	hsa:7070	3	303	0.0460120544025111	0.816	51.3808666017527	0.000999000999000999	0.00661285723668326
1822	1822	hsa:7074	3	884	-0.0771820671046	0.007	136.343743914314	0.198	0.0105077280622052
1823	1823	hsa:7076	4	1291	-0.0139665896994176	0.276	194.013364167478	0.014	0.0253325863292095
1824	1824	hsa:7078	2	73	-0.0469669945044775	0.359	12.4753407984421	0.000999000999000999	0.00320381056289856
1825	1825	hsa:114609	5	1534	-0.0333941005009165	0.061	220.386733203505	0.548	0.147028425107946
1826	1826	hsa:7082	2	284	0.100504781906963	0.988	42.431523855891	0.066	0.243237128690932
1827	1827	hsa:9414	1	14	NA	1	2.17994157740993	0.049	0.196780814062704
1828	1828	hsa:7083	1	5	NA	1	1.73885102239533	0.009	0.0513947763148133
1829	1829	hsa:7084	1	5	NA	1	1.16229308666018	0.006	0.0366959748585245
1830	1830	hsa:7086	3	196	-0.0609343986503054	0.129	27.9908714703019	0.071	0.0521423543950248
1831	1831	hsa:83660	3	492	-0.0408742858965176	0.181	87.3127312560857	0.000999000999000999	0.00173912123665605
1832	1832	hsa:54106	5	1381	-0.0499280146855162	0.019	168.087049659202	0.212	0.0262403468050188
1833	1833	hsa:7108	4	66	-0.17295797170835	0.049	7.16667478091529	0.4	0.096671623969815
1834	1834	hsa:3371	3	577	-0.0275356341499284	0.262	103.973490749757	0.000999000999000999	0.00242059877651199
1835	1835	hsa:7128	4	1258	-0.025404887298384	0.121	198.199221032132	0.078	0.0534474995704284
1836	1836	hsa:8797	2	15	0.0382779501175476	0.606	2.95920155793574	0.009	0.0338770082943234
1837	1837	hsa:8795	2	69	-0.0793854684033085	0.203	12.5295520934761	0.07	0.0746566306769672
1838	1838	hsa:8792	12	1926	-0.0338338087253745	0.045	259.647517039922	0.466	0.102011971242412
1839	1839	hsa:4982	5	1307	-0.0375832196149441	0.039	146.467429406037	0.348	0.0719281585759204
1840	1840	hsa:23495	6	1460	-0.0429846144507914	0.024	172.806596884129	0.232	0.0344699253739297
1841	1841	hsa:115650	5	1494	-0.0326878934899638	0.094	210.507643622201	0.556	0.206518451170173
1842	1842	hsa:8764	1	5	NA	1	1.40649951314508	0.015	0.0779955761681989
1843	1843	hsa:7132	3	700	-0.0210048842284015	0.262	101.020593962999	0.000999000999000999	0.00242059877651199
1844	1844	hsa:7133	4	1072	-0.0188845310005578	0.23	153.100754625122	0.012	0.0190233678939385
1845	1845	hsa:8743	19	1963	-0.0256329430599765	0.085	238.932935735151	0.482	0.171865675228735
1846	1846	hsa:8600	4	1239	-0.0312317491937889	0.083	151.051850048686	0.312	0.120511354478028
1847	1847	hsa:8740	3	119	-0.132652110572608	0.04	15.910029211295	0.759	0.136456946351165
1848	1848	hsa:7137	2	117	-0.0990435005047317	0.102	15.133106134372	0.000999000999000999	0.00103849830069064
1849	1849	hsa:7148	4	1184	-0.0456143026960727	0.052	144.344717624148	0.01	0.00445207450812218
1850	1850	hsa:10140	7	424	0.0913160034986415	0.989	56.8299415774099	0.044	0.179922410795892
1851	1851	hsa:54472	5	1414	-0.034525875814438	0.058	202.605111976631	0.672	0.165445683647928
1852	1852	hsa:7156	4	61	-0.264643714722058	0.005	11.1537487828627	0.029	0.00142662263825384
1853	1853	hsa:8940	4	61	-0.314881165652346	0.001	6.10800876338851	0.648	0.00540536967032458
1854	1854	hsa:7157	20	1963	-0.0272444752751812	0.078	205.152555988315	0.521	0.170803614558767
1855	1855	hsa:7159	12	1925	-0.0206525381750462	0.159	199.649318403116	0.404	0.240576119766862
1856	1856	hsa:9540	2	43	-0.051348939620685	0.372	7.91601752677702	0.037	0.0727523581599696
1857	1857	hsa:7161	19	1957	-0.028511946894871	0.073	259.259201557936	0.511	0.159980686987214
1858	1858	hsa:7168	4	958	0.0547684307389546	0.977	124.59547224927	0.006	0.0359883681278969
1859	1859	hsa:7173	5	1689	-0.0385371795393229	0.023	268.8179406037	0.695	0.0821006303760783
1860	1860	hsa:7175	2	65	-0.0273470884714122	0.398	9.72093476144109	0.014	0.0344906868149158
1861	1861	hsa:8717	18	1957	-0.025031345865979	0.103	255.195009737098	0.462	0.192495680870377
1862	1862	hsa:7186	18	1957	-0.0224166757847574	0.149	330.555136319377	0.491	0.264478573168125
1863	1863	hsa:7187	3	879	-0.027783175543654	0.16	127.43347127556	0.000999000999000999	0.00155705674214802
1864	1864	hsa:9618	12	1926	-0.0307252351105569	0.07	239.525657254138	0.42	0.133086761776343
1865	1865	hsa:7188	4	1426	-0.0443325800335924	0.036	205.324732229796	0.909	0.144628512894921
1866	1866	hsa:23471	6	1196	-0.0240535253038183	0.17	148.384712755599	0.137	0.11085413953355
1867	1867	hsa:7706	3	129	-0.0331412507506309	0.313	18.4002677702045	0.019	0.0364245923049684
1868	1868	hsa:9322	5	1463	-0.0438520006441397	0.029	209.737195715677	0.475	0.072799496452317
1869	1869	hsa:7205	5	1436	-0.0404725067905384	0.033	214.040895813048	0.574	0.094073048734576
1870	1870	hsa:29850	4	916	0.0383191920861566	0.908	125.112828627069	0.031	0.128644212584861
1871	1871	hsa:51393	5	1455	-0.0560572231299028	0.005	196.490092502434	0.457	0.0161809744468432
1872	1872	hsa:56302	4	1485	-0.0180091152124731	0.209	187.744011684518	0.105	0.105757694150951
1873	1873	hsa:55503	6	1544	-0.0428403775587348	0.027	207.36441090555	0.436	0.0640635942130476
1874	1874	hsa:7248	5	1651	-0.0241583056772857	0.13	249.519717624148	0.526	0.25182130930444
1875	1875	hsa:7249	19	1959	-0.0237528614657501	0.108	281.681986368062	0.484	0.20654206213778
1876	1876	hsa:7253	2	58	0.0232409866852407	0.619	9.99391431353457	0.019	0.0640147267261978
1877	1877	hsa:7263	3	304	-0.0752550748984263	0.051	48.9307692307692	0.09	0.0293019874200354
1878	1878	hsa:7264	1	2	NA	1	0.501777020447907	0.028	0.128115421526594
1879	1879	hsa:7270	2	135	-0.105647179475095	0.069	18.57852969815	0.946	0.243417286727186
1880	1880	hsa:8458	2	135	-0.105647179475095	0.071	15.7739776046738	0.737	0.206704354406064
1881	1881	hsa:7272	3	19	-0.43355498476206	0.014	3.05854430379747	0.044	0.00516963437416935
1882	1882	hsa:203068	21	1963	-0.0154473570995583	0.236	411.735150925024	0.498	0.369164694622822
1883	1883	hsa:7991	8	42	-0.16057584386299	0.081	5.87256572541383	0.107	0.049819931674049
1884	1884	hsa:221830	3	421	0.00576863499712827	0.559	47.645253164557	0.495	0.632216503280553
1885	1885	hsa:114112	3	36	-0.217847715431317	0.066	3.88907010710808	0.547	0.15601143600195
1886	1886	hsa:7297	4	1443	-0.0634788842440688	0.003	187.697857838364	0.589	0.012967080175334
1887	1887	hsa:7298	2	104	0.0240663123424366	0.599	21.4014605647517	0.008	0.0303851491478658
1888	1888	hsa:7306	20	1959	-0.0282711896505456	0.071	391.137463485881	0.494	0.152582252572843
1889	1889	hsa:91373	4	46	-0.162946646763097	0.102	5.63191333982473	0.887	0.307855224982702
1890	1890	hsa:7316	2	47	-0.142953221652607	0.13	5.28773125608569	0.474	0.233340692581835
1891	1891	hsa:7321	5	1299	-0.0365667726371706	0.039	179.356158714703	0.299	0.0635700037515948
1892	1892	hsa:7322	3	277	0.0318976058308961	0.729	48.1293330087634	0.000999000999000999	0.00598991576609837
1893	1893	hsa:7324	3	143	-0.095382798144286	0.069	21.5628042843233	0.202	0.0734969745294515
1894	1894	hsa:7326	22	1957	-0.0183931613024924	0.172	247.234688412853	0.464	0.281573121060412
1895	1895	hsa:7329	2	7	0	0.561	1.37643622200584	0.01	0.0346877775785007
1896	1896	hsa:51465	7	1196	-0.0219962532858376	0.198	175.700316455696	0.303	0.228787762241292
1897	1897	hsa:118424	4	13	-0.0458028612414344	0.447	2.14532619279455	0.01	0.0286543399104943
1898	1898	hsa:83549	3	168	0.0548881347058895	0.797	30.1873904576436	0.153	0.378531441989849
1899	1899	hsa:7371	19	1957	0.000147796640357096	0.536	272.629040895813	0.475	0.602908481541858
1900	1900	hsa:54963	21	1963	0.000256829729142256	0.534	246.016747809153	0.496	0.616746098678225
1901	1901	hsa:7357	6	1729	0.00488164152874864	0.635	200.597370983447	0.227	0.423344573642516
1902	1902	hsa:7358	3	270	-0.0923468621007798	0.035	31.5065725413827	0.159	0.034454352407527
1903	1903	hsa:7360	3	239	-0.0861768444741087	0.056	36.754746835443	0.177	0.0556460585427033
1904	1904	hsa:79465	5	743	-0.0408505577340652	0.096	94.1161148977605	0.000999000999000999	0.000983224314900734
1905	1905	hsa:8408	4	1033	-0.0351658553906761	0.088	108.906548198637	0.395	0.151528850135613
1906	1906	hsa:7372	2	115	-0.0379426947649138	0.298	21.976241480039	0.012	0.023721433267895
1907	1907	hsa:219699	21	1957	-0.0226785838880029	0.135	367.125146056475	0.51	0.253080554954645
1908	1908	hsa:51733	5	962	-0.0131333944717443	0.317	144.994912366115	0.256	0.284959676071822
1909	1909	hsa:26019	4	74	-0.0473393719073745	0.325	12.7231499513145	0.271	0.302059074310032
1910	1910	hsa:65109	7	1181	0.00983977585635339	0.633	226.713023369036	0.136	0.297208941409235
1911	1911	hsa:7389	3	6	-0.596284793999944	0.088	1.07329600778968	0.116	0.057007428902692
1912	1912	hsa:7390	3	7	0.327326835353989	0.867	1.13196202531646	0.038	0.145386923095334
1913	1913	hsa:7398	5	70	-0.21682128501289	0.008	15.3943281402142	0.022	0.001697524675075
1914	1914	hsa:7874	19	1957	-0.0242654925074618	0.092	219.149318403116	0.482	0.182510053728245
1915	1915	hsa:80146	4	429	-0.105445393291502	0.003	59.1028724440117	0.252	0.00618972670142927
1916	1916	hsa:6843	4	166	-0.136651028470883	0.019	15.6663583252191	0.999	0.0942276971836335
1917	1917	hsa:9341	4	166	-0.103565281350568	0.055	22.502458617332	0.397	0.105337304244794
1918	1918	hsa:8674	4	166	-0.0972329989389121	0.059	30.1258276533593	0.246	0.0759465598649235
1919	1919	hsa:81839	2	25	-0.0852802865422441	0.312	2.47327166504382	0.822	0.60545174150169
1920	1920	hsa:57216	1	3	NA	1	0.731158714703019	0.049	0.196780814062704
1921	1921	hsa:7409	3	894	-0.00828022917396082	0.395	97.9389970788705	0.167	0.24529949263834
1922	1922	hsa:7410	3	917	-0.0450002343338257	0.076	119.230087633885	0.732	0.216352664621164
1923	1923	hsa:7414	4	1177	-0.0298678517082355	0.118	149.222663096397	0.21	0.116409462020917
1924	1924	hsa:7415	23	1957	-0.0192972521445912	0.163	269.650827653359	0.429	0.255954038525074
1925	1925	hsa:7417	5	1353	-0.033890176558416	0.076	171.767137293087	0.619	0.190842074980267
1926	1926	hsa:7423	2	230	-0.129280837592157	0.011	25.0116845180136	0.258	0.0194818928772933
1927	1927	hsa:7424	2	230	-0.130278374919257	0.01	21.9696932814021	0.914	0.052053167326737
1928	1928	hsa:7431	5	1018	-0.0622006340697379	0.009	151.124196689387	0.001	0.000113564573825652
1929	1929	hsa:143187	5	166	-0.137935790914403	0.012	26.0393865628043	0.333	0.0260637558271106
1930	1930	hsa:7448	4	1181	-0.0502416722529941	0.035	136.802190847128	0.22	0.0451723191159433
1931	1931	hsa:7450	4	1181	-0.0492804545367201	0.034	172.236416747809	0.016	0.00463300935324293
1932	1932	hsa:8936	4	1192	-0.0241390033694996	0.185	135.742405063291	0.459	0.294324265555719
1933	1933	hsa:8976	2	138	-0.105885522766408	0.063	22.4357108081792	0.049	0.0209315749317976
1934	1934	hsa:114049	4	404	-0.045561585483287	0.124	45.4876095423564	0.992	0.380771987911227
1935	1935	hsa:10885	6	13	-0.229014306207172	0.182	2.04362220058423	0.021	0.025099003037553
1936	1936	hsa:134430	10	30	0.172798228259222	0.903	5.84201557935735	0.003	0.0187223750143167
1937	1937	hsa:7468	2	13	-0.0482804549585268	0.488	2.13780428432327	0.153	0.26839895387438
1938	1938	hsa:54904	4	66	-0.0574923287259256	0.292	11.6428432327167	0.196	0.220952268464912
1939	1939	hsa:11197	2	25	0.167487157871725	0.855	4.47025316455696	0.061	0.206196629652271
1940	1940	hsa:7471	1	13	NA	1	3.34130963972736	0.049	0.196780814062704
1941	1941	hsa:7480	3	321	0.00452136150429931	0.509	63.9375851996105	0.238	0.376847548442035
1942	1942	hsa:7481	3	321	0.00732772381731267	0.536	40.1114897760467	0.196	0.341774665111919
1943	1943	hsa:51384	3	321	0.0100561316216312	0.549	51.3284566699124	0.079	0.179467648093411
1944	1944	hsa:7472	3	321	0.00218272624345484	0.488	48.1873904576436	0.04	0.0963568824249052
1945	1945	hsa:7473	3	371	-0.00257735020564258	0.442	57.4187195715677	0.066	0.132281773982568
1946	1946	hsa:89780	3	371	0.00893081815443591	0.56	63.0364897760467	0.15	0.292062832331661
1947	1947	hsa:54361	4	1227	0.031488133064897	0.936	152.756085686465	0.196	0.494557093145427
1948	1948	hsa:7474	4	998	0.0608245873466612	0.99	121.867356377799	0.127	0.386446057572846
1949	1949	hsa:7476	1	12	NA	1	1.86207400194742	0.056	0.217414600941831
1950	1950	hsa:7484	4	998	0.0646547542579519	0.994	157.6788218111	0.169	0.467651964667708
1951	1951	hsa:7494	2	104	-0.177632761781864	0.018	13.9560613437196	0.934	0.0855001556272417
1952	1952	hsa:7514	4	27	-0.140662675539481	0.187	5.53722005842259	0.151	0.128961826858971
1953	1953	hsa:57510	5	42	0.0718137914447431	0.707	6.12210321324245	0.203	0.422134573271392
1954	1954	hsa:9942	5	196	-0.070330259070309	0.091	29.1515335929893	0.609	0.21573690004195
1955	1955	hsa:7529	2	118	-0.0865870512364304	0.113	14.2580087633885	0.38	0.178113036831663
1956	1956	hsa:7532	2	118	-0.089625193385077	0.103	16.2713972736125	0.01	0.00811454237104282
1957	1957	hsa:7533	2	118	-0.0906379074346259	0.1	20.2413096397274	0.437	0.180498793629682
1958	1958	hsa:7534	2	118	-0.0855743371868815	0.118	13.6361976630964	0.643	0.271528858071468
1959	1959	hsa:7704	19	1957	-0.0333048211606204	0.039	282.280842259007	0.482	0.0935013421887441
1960	1960	hsa:7709	2	46	-0.101259713440076	0.238	7.8332035053554	0.237	0.218583388592551
1961	1961	hsa:9765	2	29	0	0.509	6.3513388510224	0.009	0.0292535237134392
1962	1962	hsa:9372	19	1957	-0.0233813091526521	0.11	244.271616358325	0.5	0.214523215156232
1963	1963	hsa:10269	4	75	-0.0408264564088746	0.328	14.7620253164557	0.006	0.0142300913613329
1964	1964	hsa:7791	2	55	-0.183629832002855	0.025	8.45328627069133	0.112	0.0192587804130427
