# Supplementary material for: GeneSurrounder: network-based identification of disease genes in expression data
Source: BMC Bioinformatics. 2019 May 6;20:229. doi: 10.1186/s12859-019-2829-y (PMC6503437; doi:10.1186/s12859-019-2829-y)
Supplement: Supplementary file 6 — Table of the full results of GeneSurrounder applied to GSE32894. (CSV 362 kb) [file 12859_2019_2829_MOESM6_ESM.csv]

	X1	gene.id	radius	size	observed.tau_b	p.Decay	observed.cor	p.Sphere	p.Fisher
1	1	hsa:2	5	2183	-0.0258789507347917	0.105	356.248885145772	0.000999000999000999	0.00106600171763704
2	2	hsa:53947	13	3637	-0.001307149498987	0.484	349.506722898764	0.535	0.608809086692813
3	3	hsa:65985	2	45	-0.0332513323891104	0.403	5.49573295120646	0.002	0.00654748201325887
4	4	hsa:51166	3	257	0.0604095380783891	0.87	43.5929087099965	0.055	0.19329888710783
5	5	hsa:60496	4	183	0.0119327510110099	0.572	26.0526893926282	0.136	0.276450728036561
6	6	hsa:10157	13	3636	0.00575088954103007	0.661	441.844842594212	0.505	0.700055274805311
7	7	hsa:18	2	157	0.120508721995997	0.965	26.717444169349	0.206	0.51993649495886
8	8	hsa:5244	5	1656	-0.0100925378380278	0.335	158.16781593531	0.156	0.206506645227174
9	9	hsa:4363	4	1429	0.0154864684220564	0.752	108.643426625011	0.042	0.14071002418325
10	10	hsa:1244	2	4	-0.707106781186548	0.261	0.310460417276691	0.227	0.226681399769341
11	11	hsa:6833	4	2455	-0.0114701660799668	0.26	123.335927303494	0.049	0.0683247299313976
12	12	hsa:10152	3	826	-0.0574844995833126	0.025	69.3534666294952	0.043	0.0084230922137077
13	13	hsa:25	3	1502	-0.00476650545692232	0.42	134.572463488156	0.000999000999000999	0.00368234490084753
14	14	hsa:27	7	3454	-0.0154252855097265	0.238	366.714561574386	0.199	0.191813024291274
15	15	hsa:3983	3	826	-0.0652355771182423	0.011	129.05021155189	0.234	0.0179209451930863
16	16	hsa:84448	3	826	-0.0671169560617909	0.009	99.0834341816962	0.002	0.000214652498401226
17	17	hsa:22885	4	2011	-0.0387535837719177	0.027	213.606298201363	0.005	0.00133788183023599
18	18	hsa:28	7	2562	-0.0104715313473513	0.305	192.163712147556	0.168	0.203486071252103
19	19	hsa:30	1	20	NA	1	4.92851871488825	0.005	0.0314915868327402
20	20	hsa:10449	2	59	-0.172642829124807	0.061	7.17937619450312	0.924	0.218462615402822
21	21	hsa:31	12	3640	-0.0180408704041002	0.105	370.266724367428	0.566	0.22719828278234
22	22	hsa:32	12	3640	-0.0204328627164178	0.076	424.954823302472	0.528	0.169166844518416
23	23	hsa:27034	2	40	0.0835467353046005	0.741	7.67693913077399	0.002	0.0111362855986244
24	24	hsa:33	3	466	-0.0100621541052725	0.396	35.4974129695109	0.000999000999000999	0.00349520275267631
25	25	hsa:34	1	20	NA	1	4.15444354220552	0.007	0.0417329159094878
26	26	hsa:36	2	53	0.0259819150865973	0.632	7.85207537503127	0.183	0.36514160682944
27	27	hsa:37	2	43	-0.0251557401807321	0.435	8.28680311860618	0.000999000999000999	0.00379860774409168
28	28	hsa:38	13	3641	-0.0128977490007256	0.201	557.257619602728	0.365	0.265016998159715
29	29	hsa:39	2	85	-0.0390021727293329	0.344	11.1143660360415	0.052	0.089862607255785
30	30	hsa:340485	4	1680	-0.0166905388607766	0.19	259.872464091641	0.004	0.00621846601475977
31	31	hsa:55331	2	61	-0.0807391122257898	0.256	6.66722360152679	0.36	0.311890552200305
32	32	hsa:43	7	2164	0.0103167595952882	0.71	184.630107094615	0.000999000999000999	0.00585253148118484
33	33	hsa:22985	7	81	-0.0650747359864546	0.234	14.6250815927418	0.001	0.00219028432956994
34	34	hsa:47	3	358	0.0414887619354585	0.817	38.1699463358122	0.000999000999000999	0.00661996161551281
35	35	hsa:130013	11	3579	-0.0223305945731447	0.055	565.217440316355	0.22	0.0655160528991913
36	36	hsa:48	13	3635	-0.0288502064250013	0.024	300.270745132553	0.544	0.0696995536688076
37	37	hsa:50	4	385	0.0515849069863357	0.887	53.9574681652637	0.001	0.00712053936560572
38	38	hsa:641371	3	5	-0.119522860933439	0.49	1.49942113033463	0.000999000999000999	0.00422061067624817
39	39	hsa:10965	3	5	-0.119522860933439	0.49	1.46007135989591	0.000999000999000999	0.00422061067624817
40	40	hsa:122970	2	4	0.235702260395516	0.707	1.080378962822	0.001	0.00583591728369186
41	41	hsa:11332	4	22	-0.137490333050799	0.255	2.62957766376279	0.787	0.522988875731295
42	42	hsa:10005	23	3713	0.00841119642884163	0.722	348.19236497396	0.514	0.738973315304231
43	43	hsa:51	1	14	NA	1	2.83451119440888	0.026	0.120891127264977
44	44	hsa:8309	5	2834	8.6203196465887e-05	0.526	417.883792167955	0.022	0.0631734792726994
45	45	hsa:52	2	107	-0.103366224867007	0.12	12.1321997253468	0.826	0.328228351009463
46	46	hsa:53	2	41	-0.124286582025353	0.213	5.10849834873073	0.274	0.224173711263757
47	47	hsa:54	6	3072	-0.00108914708090759	0.491	558.948432240021	0.159	0.277157614973791
48	48	hsa:51205	6	3072	-0.00124292124544308	0.482	448.997013467589	0.083	0.1687743457997
49	49	hsa:55	2	41	-0.111203783917421	0.245	4.02509071605703	0.124	0.136526832351525
50	50	hsa:93650	3	183	-0.00502924621562947	0.477	22.2960896955162	0.056	0.123480023156815
51	51	hsa:23205	4	1791	-0.0128486940156357	0.318	255.349367892197	0.187	0.227299898301623
52	52	hsa:81616	13	3640	-0.00982620275310425	0.284	174.582438340517	0.538	0.439838932251111
53	53	hsa:2180	2	84	0.104322494589047	0.883	9.91407041702172	0.059	0.206025292347244
54	54	hsa:2181	4	1791	-0.0141893406935463	0.293	188.242405536089	0.407	0.372841204572688
55	55	hsa:2182	13	3640	-0.00996741639024234	0.282	398.702086059183	0.651	0.494770718219303
56	56	hsa:51703	4	1791	-0.0134323633716948	0.308	228.924924181546	0.011	0.0226573025214276
57	57	hsa:348158	2	12	NA	1	1.29530201243656	0.063	0.237171094813208
58	58	hsa:6296	4	237	0.0542011334670218	0.835	35.7588268864324	0.000999000999000999	0.00674763277565218
59	59	hsa:54988	3	56	0.01330772826748	0.594	4.44579835630375	0.097	0.222055177546341
60	60	hsa:84532	12	3633	-0.00617327169775279	0.357	373.090590678804	0.532	0.505412698522368
61	61	hsa:55902	12	3633	-0.00619845605194615	0.36	429.829321635531	0.669	0.583705234804378
62	62	hsa:59	4	1048	-0.00511835026630763	0.411	191.424844956321	0.001	0.00361553302816537
63	63	hsa:60	2	539	0.0291614005236916	0.78	68.7766264458831	0.000999000999000999	0.00635627231580291
64	64	hsa:70	4	1734	-0.00897101011712462	0.332	190.127534832333	0.002	0.00552263966323593
65	65	hsa:71	2	539	0.0290833593090876	0.779	71.0697281120575	0.073	0.219906967714437
66	66	hsa:72	4	1048	-0.00475185111143622	0.415	180.667078692721	0.001	0.00364670129565944
67	67	hsa:87	2	233	0.0211896813313778	0.633	48.6198642200345	0.000999000999000999	0.00529041267700796
68	68	hsa:88	5	3026	-0.0176870557425478	0.164	317.293779553801	0.893	0.427794720204749
69	69	hsa:81	5	3026	-0.0178145177317659	0.16	340.626224966063	0.994	0.451450870217189
70	70	hsa:90	3	515	-0.000869584908941021	0.498	82.3314233164184	0.027	0.0713858038264199
71	71	hsa:91	4	1838	-0.0363517608655679	0.044	136.827625363787	0.682	0.135224788316206
72	72	hsa:130399	4	1722	-0.0431205860485379	0.023	115.802652784481	0.866	0.097919505891909
73	73	hsa:92	8	3453	-0.0244225262968153	0.052	546.655393927258	0.398	0.100951255806501
74	74	hsa:93	5	1489	-0.0269278146475948	0.133	160.80235267666	0.085	0.0619797775086162
75	75	hsa:91703	6	3234	-0.0100126840736754	0.25	299.825928755943	0.108	0.124521797150401
76	76	hsa:97	1	7	NA	1	0.861297478528171	0.076	0.271853667340881
77	77	hsa:98	3	242	0.0632685917183201	0.879	41.1017991808221	0.275	0.584963516647513
78	78	hsa:100	2	86	-0.0454942412580608	0.309	16.6445640111814	0.215	0.246575578788994
79	79	hsa:102	2	59	0.0186626936776576	0.578	10.1689574191433	0.314	0.491216029814504
80	80	hsa:6868	2	38	0.0440424656649017	0.633	4.35522176259579	0.066	0.174439250981912
81	81	hsa:107	4	2893	-0.00451839984070238	0.389	254.833605938244	0.129	0.200328514003815
82	82	hsa:108	2	570	0.0484948412509297	0.917	49.2313467354919	0.181	0.464056099198117
83	83	hsa:109	5	3290	0.00109693483803731	0.536	532.682156995222	0.244	0.39682588151457
84	84	hsa:196883	3	1781	0.00115532791014779	0.499	262.399343347378	0.035	0.0881555725386332
85	85	hsa:112	4	2893	-0.00221446744020132	0.433	458.797495468808	0.122	0.208174153806482
86	86	hsa:113	5	3288	0.00251841857809946	0.577	510.680332215787	0.13	0.269295939413454
87	87	hsa:115	4	2893	-0.00373772566361008	0.41	411.934124829741	0.129	0.208362323167596
88	88	hsa:116	3	175	0.0256050105796065	0.645	14.5017538895177	0.005	0.0217262520101685
89	89	hsa:124	1	52	NA	1	7.68147999268063	0.026	0.120891127264977
90	90	hsa:125	6	3309	0.0111429982536204	0.782	341.795495929524	0.13	0.334067098165497
91	91	hsa:126	2	210	0.0868420825688415	0.88	23.3905988362457	0.000999000999000999	0.00706513244028581
92	92	hsa:127	2	210	0.0886295696886118	0.89	12.5013227421459	0.000999000999000999	0.00713537147857977
93	93	hsa:128	6	3309	0.0108534074259522	0.778	548.959993547202	0.367	0.643410623003119
94	94	hsa:130	3	493	0.0599947063253117	0.946	49.076147006694	0.000999000999000999	0.00752667037445178
95	95	hsa:131	1	52	NA	1	5.52510073793558	0.000999000999000999	0.00790085392538984
96	96	hsa:55256	2	28	-0.0855920985021826	0.293	3.22494043337304	0.323	0.317768009932946
97	97	hsa:9370	11	3618	-0.0102739528388158	0.264	320.497702689841	0.723	0.506985088952126
98	98	hsa:51094	12	3630	-0.0162017097699599	0.13	426.56033726389	0.576	0.268959109297343
99	99	hsa:79602	11	3599	-0.0149134251613266	0.138	410.472284080944	0.466	0.240773733217125
100	100	hsa:132	2	172	0.00559701242952984	0.536	18.8106926202538	0.003	0.0119518846860264
101	101	hsa:84890	1	2	NA	1	0.366754744392166	0.068	0.25080083501881
102	102	hsa:135	2	150	-0.125689792469599	0.031	26.4105947380926	0.361	0.0614681946170817
103	103	hsa:136	2	150	-0.124788790373043	0.032	14.4748501548952	0.973	0.13915894488026
104	104	hsa:83440	12	3630	-0.0106968858435135	0.237	375.127569785115	0.628	0.432355222022721
105	105	hsa:56985	11	3600	-0.0126426213295549	0.193	405.013844095736	0.543	0.341195262237298
106	106	hsa:148	3	594	-0.0128150263270894	0.312	39.9280280255133	0.267	0.290335991724
107	107	hsa:146	6	3186	0.00497938110355862	0.58	380.941175751583	0.01	0.0356694046962927
108	108	hsa:153	3	560	-0.0423346246145281	0.104	52.419990585292	0.808	0.292142088268561
109	109	hsa:154	2	174	-0.0434788457348395	0.24	13.0856701440727	0.967	0.571073022138339
110	110	hsa:158	2	188	0.00702502996312056	0.54	20.0284309941056	0.000999000999000999	0.00459886922689219
111	111	hsa:159	2	217	-0.0755245402597738	0.1	32.2684753163492	0.677	0.249993698006627
112	112	hsa:122622	2	217	-0.0791682680793243	0.091	26.7442621239815	0.645	0.225118846120379
113	113	hsa:125061	4	1019	0.043833616693296	0.958	119.408789251198	0.002	0.0139053998885145
114	114	hsa:174	4	1593	-0.0467652483656837	0.009	89.368121479454	0.556	0.0315127785026329
115	115	hsa:55750	3	191	-0.0922735418819993	0.051	15.8185293373202	0.987	0.20079504230684
116	116	hsa:178	12	3626	-0.00953107205919125	0.251	519.897944412211	0.563	0.417831168198772
117	117	hsa:79814	2	27	-0.11129676054903	0.258	3.04758439011466	0.453	0.367762606149683
118	118	hsa:10554	5	2941	-0.00589931547307201	0.346	269.515370349888	0.474	0.460501003096527
119	119	hsa:10555	2	115	-0.00722847286867973	0.441	9.72228328765575	0.111	0.196633008740471
120	120	hsa:56894	3	471	0.00844467665643409	0.608	51.4918560494801	0.116	0.257550305558445
121	121	hsa:56895	5	2941	-0.0061962608827904	0.343	323.648046818623	0.433	0.431751027650456
122	122	hsa:375790	2	13	0.0653720450460613	0.615	1.9414127729582	0.038	0.111154780788181
123	123	hsa:181	5	2763	-0.0348042228716473	0.013	164.360202819382	0.444	0.035525139874943
124	124	hsa:185	3	594	-0.011153614097994	0.327	72.0614698247231	0.000999000999000999	0.00294873308009974
125	125	hsa:186	4	1561	0.0125271779327553	0.714	96.9171316945407	0.093	0.246486090060308
126	126	hsa:191	2	37	-0.0454938496383803	0.408	5.24330813668952	0.000999000999000999	0.00358895014648194
127	127	hsa:10768	13	3641	-0.00833065624618461	0.309	302.987008608851	0.57	0.481985543241507
128	128	hsa:23382	2	37	-0.0568673120479754	0.393	3.56560093220675	0.234	0.311418261994265
129	129	hsa:9447	2	8	-0.357142857142857	0.264	2.2792466755968	0.000999000999000999	0.00243707102113874
130	130	hsa:84962	5	1728	-0.0413571271624994	0.01	203.354330363054	0.029	0.00265223259414529
131	131	hsa:204	2	190	0.0621914872428149	0.83	21.4812803534005	0.000999000999000999	0.00671220780892166
132	132	hsa:50808	4	962	-0.0325655421296671	0.144	107.021704965005	0.998	0.422505229552222
133	133	hsa:205	6	3388	-0.0109205260624997	0.203	374.880277200309	0.133	0.124518185213469
134	134	hsa:26289	12	3640	-0.0146069240927512	0.124	249.789905888619	0.472	0.22464509639645
135	135	hsa:10327	14	3651	0.00953138960854077	0.76	440.670308918086	0.461	0.717815494459945
136	136	hsa:231	3	464	-0.0486822447214804	0.112	57.8755738420028	0.795	0.304398338692202
137	137	hsa:57016	3	464	-0.0501471066489071	0.111	42.4167520423863	0.001	0.00112176381958836
138	138	hsa:1646	3	331	0.00394962480418025	0.541	25.9834333828234	0.000999000999000999	0.00460638572595697
139	139	hsa:8644	2	215	0.031352405737524	0.669	26.8217600882752	0.000999000999000999	0.00555432137140374
140	140	hsa:1109	2	145	0.108569565435038	0.902	13.2438783577983	0.000999000999000999	0.00721951026522251
141	141	hsa:6718	19	3707	0.0109863302233338	0.779	555.682582259925	0.477	0.739443860968486
142	142	hsa:207	2	735	-0.019970528633838	0.254	81.3813327906285	0.013	0.0221670753343648
143	143	hsa:84335	2	110	-0.112900270663391	0.066	9.33500372644655	0.1	0.0397365251576684
144	144	hsa:208	5	3379	-0.0356254721063003	0.017	261.079654653319	0.811	0.0728509100260613
145	145	hsa:10000	4	3008	-0.0285396896086256	0.047	429.928194466305	0.066	0.0210182468805346
146	146	hsa:210	4	159	-0.0872119937018083	0.081	9.66529494289329	0.353	0.13022948755243
147	147	hsa:211	5	1004	0.040132796767237	0.935	142.477186052465	0.000999000999000999	0.00745007582379931
148	148	hsa:212	3	158	-0.113056696477997	0.044	10.3006188033006	0.708	0.139214451019135
149	149	hsa:5832	2	20	-0.220546668193739	0.134	2.28299231093723	0.000999000999000999	0.00132777404057785
150	150	hsa:216	6	3282	0.00874854557896974	0.738	475.238582609407	0.08	0.226096047426653
151	151	hsa:8854	4	1368	0.0255085592892788	0.87	148.255880200187	0.000999000999000999	0.00699477987670769
152	152	hsa:220	4	1407	0.0650599722248872	0.999	131.371794836204	0.137	0.409052692772873
153	153	hsa:219	2	207	0.0318501880987655	0.701	20.9757063197374	0.173	0.377123991372126
154	154	hsa:10840	4	444	-0.0285564899763027	0.215	74.9633128960656	0.025	0.0334647322892052
155	155	hsa:160428	7	3125	-0.014049858217068	0.196	248.673174859133	0.195	0.162985228121298
156	156	hsa:217	5	2835	0.0159516891314317	0.828	419.791350177134	0.011	0.0519028682071501
157	157	hsa:218	2	172	-0.0151788758350001	0.422	14.8478629813288	0.000999000999000999	0.00369787712495334
158	158	hsa:224	3	593	0.0581195664561329	0.951	39.4239761343795	0.104	0.327728847894231
159	159	hsa:221	2	172	-0.0200896886051472	0.39	12.5738519106081	0.942	0.735259101991789
160	160	hsa:222	1	42	NA	1	4.87670426225981	0.029	0.131673324020874
161	161	hsa:8659	3	275	0.0178584046129469	0.636	47.0919342560384	0.01	0.0385271430943675
162	162	hsa:7915	1	1	NA	1	0.330585351879563	0.016	0.0821626649078777
163	163	hsa:4329	2	137	0.0481686707514332	0.773	21.6295814312255	0.000999000999000999	0.00630619038012566
164	164	hsa:501	3	608	0.0718299801331551	0.976	38.7712008185902	0.139	0.406662884348277
165	165	hsa:223	2	207	0.0318501880987655	0.705	22.0647731216339	0.000999000999000999	0.00581629384627072
166	166	hsa:226	2	137	-0.0409714969571485	0.3	22.5125999647492	0.004	0.00927052046662582
167	167	hsa:229	12	3629	-0.0260213882314723	0.026	430.946731388029	0.686	0.0896533030915807
168	168	hsa:230	2	40	0.0586009038673119	0.683	6.32140118940695	0.006	0.0266257560271199
169	169	hsa:56052	3	29	-0.433157726196298	0.002	5.41291623389647	0.000999000999000999	2.82185072482266e-05
170	170	hsa:144245	10	83	-0.138380686422885	0.054	13.7113000399159	0.001	0.0005846324316156
171	171	hsa:79087	14	83	-0.196715214571967	0.013	7.83334071326879	0.165	0.0153252007335616
172	172	hsa:79868	7	47	-0.244197829846347	0.015	8.63168184363766	0.000999000999000999	0.000181445452405522
173	173	hsa:199857	7	47	-0.240144753832299	0.022	9.80416792505216	0.000999000999000999	0.000257702584723935
174	174	hsa:85365	4	30	-0.398312776385946	0.003	3.56681885267167	0.023	0.000730116879682324
175	175	hsa:10195	3	31	-0.317013784047016	0.02	4.24597922512404	0.06	0.00927052046662582
176	176	hsa:29880	6	47	-0.27110128312394	0.012	4.94617037501578	0.111	0.0101512701775428
177	177	hsa:29929	3	25	-0.135466802133537	0.193	4.01469514969119	0.006	0.00898730852200468
178	178	hsa:79053	11	83	-0.139261882062059	0.057	12.6793723391544	0.000999000999000999	0.000613473677379001
179	179	hsa:79796	4	33	-0.215008984039769	0.071	4.09882850856158	0.249	0.0890204438514374
180	180	hsa:238	5	3088	-0.0221243218892308	0.131	178.100718917481	0.346	0.185558953760607
181	181	hsa:239	2	184	-0.0521622218859492	0.236	10.6280725112719	0.997	0.575742578970583
182	182	hsa:242	1	30	NA	1	1.84345806407104	0.06	0.228804643005602
183	183	hsa:246	2	204	0.0157286024496376	0.598	19.8073550933231	0.284	0.470934891339851
184	184	hsa:247	1	35	NA	1	2.38415175756192	0.265	0.616926745043918
185	185	hsa:240	1	37	NA	1	5.57126156926514	0.004	0.026085843671449
186	186	hsa:249	9	1720	-0.0445233935754203	0.02	164.996870928586	0.469	0.0531768663397423
187	187	hsa:250	3	5	-0.670820393249937	0.083	1.38680852258549	0.019	0.011752168241269
188	188	hsa:57679	3	855	-0.0522986451836211	0.029	64.5331964370385	0.32	0.0527094138346678
189	189	hsa:10189	4	52	-0.0297647549066955	0.391	9.10090093940475	0.002	0.00637615884922163
190	190	hsa:23600	3	102	0.185813157704277	0.993	13.9029095030886	0.131	0.395398019546703
191	191	hsa:262	2	21	-0.083848455093346	0.339	3.16704140882168	0.067	0.108677567399883
192	192	hsa:144193	5	579	-0.0134098343554866	0.365	50.7426526047305	0.284	0.338619795238425
193	193	hsa:51005	2	50	-0.165714285714286	0.071	5.04215312295238	0.507	0.155662535424912
194	194	hsa:267	5	855	-0.00814182743419024	0.39	85.880504938204	0.095	0.159147790654243
195	195	hsa:154796	2	63	-0.182153022215675	0.032	8.85434246366536	0.078	0.0174546923078735
196	196	hsa:270	6	3330	-0.0086714491865843	0.239	465.355227780973	0.174	0.173829135119743
197	197	hsa:272	11	3624	-0.0121381470745005	0.186	447.084213962245	0.516	0.320910835631023
198	198	hsa:273	2	182	-0.0380094676249972	0.236	13.8185421336318	0.001	0.00220699618569353
199	199	hsa:275	3	301	-0.0587456026936635	0.09	55.7540459619342	0.049	0.0283293133997981
200	200	hsa:280	2	34	-0.0829925002758732	0.273	4.7565378720001	0.171	0.189737227754613
201	201	hsa:64682	6	3331	-0.0375762041100058	0.003	273.257548069807	0.935	0.019288166630721
202	202	hsa:10393	6	3331	-0.0366107663609158	0.004	424.91819345297	0.951	0.0249987549188734
203	203	hsa:51529	3	516	0.0111643040931499	0.572	77.1850881581679	0.000999000999000999	0.00483849775252432
204	204	hsa:25847	6	3331	-0.0366271005703839	0.004	401.894590900874	0.882	0.023450701168875
205	205	hsa:29882	6	3331	-0.0365931426085949	0.004	326.38610573635	0.944	0.024842643955919
206	206	hsa:29945	2	92	0.0223921179463263	0.599	15.8361831099583	0.000999000999000999	0.00503928853910985
207	207	hsa:51433	6	3331	-0.0373238835584849	0.004	350.120025627065	0.875	0.0232924730867037
208	208	hsa:51434	6	3331	-0.0375663176148014	0.003	396.194070716264	0.813	0.0171124317026262
209	209	hsa:284	3	1453	-0.0224064602199983	0.168	212.612388646662	0.084	0.0742394186513762
210	210	hsa:285	3	1453	-0.0218057696661659	0.168	108.440067735007	0.003	0.00433083888210602
211	211	hsa:51129	3	427	-0.014826991651918	0.361	39.8580039507227	0.000999000999000999	0.00321965553255462
212	212	hsa:286	6	3303	-0.00489224628503405	0.362	195.506394340824	0.269	0.324186452331407
213	213	hsa:287	3	816	0.0428804077711569	0.894	110.83416162736	0.000999000999000999	0.0071634355935192
214	214	hsa:288	3	816	0.0461838217972002	0.915	127.834675158666	0.014	0.0686299485789714
215	215	hsa:290	8	3313	0.00199957410597408	0.569	612.81717714101	0.108	0.232872286200852
216	216	hsa:314	6	3149	-0.0062542159729442	0.372	324.240220018953	0.053	0.0971274195623806
217	217	hsa:8639	6	3149	-0.00608583883409621	0.374	231.413239760959	0.254	0.31860903120349
218	218	hsa:316	5	2833	0.0133122748492574	0.803	374.833740580974	0.027	0.104747826762304
219	219	hsa:160	3	59	-0.106948727313179	0.163	4.83950127585246	0.001	0.00158464693821668
220	220	hsa:161	4	477	0.0435121643597149	0.86	53.4140112257432	0.072	0.234175994117465
221	221	hsa:163	3	59	-0.1465593670588	0.092	4.9513750093746	0.746	0.25249687960099
222	222	hsa:1173	3	59	-0.134676175135114	0.106	5.04653083227221	0.912	0.322539503433055
223	223	hsa:1175	3	59	-0.104968195325898	0.158	9.30375017190269	0.328	0.205217956923451
224	224	hsa:317	3	813	-0.0295572247851288	0.16	75.3075975034458	0.015	0.0168774876999078
225	225	hsa:322	4	131	-0.154451062046926	0.018	8.47830444172169	0.312	0.0347188735984445
226	226	hsa:54518	4	1954	-0.0194153558783042	0.165	377.766261777533	0.005	0.00668260491659442
227	227	hsa:324	9	3569	-0.0213520818505046	0.099	200.77853317016	0.645	0.239529069669471
228	228	hsa:51107	3	135	0.0349739308271058	0.701	12.9601074576837	0.121	0.294092399682866
229	229	hsa:83464	12	3617	-0.0153694625205932	0.168	299.082645230363	0.577	0.323155961193162
230	230	hsa:51074	1	2	NA	1	0.376573451216469	0.098	0.325633204430533
231	231	hsa:335	13	3640	-0.00493408195125584	0.395	321.925464543174	0.506	0.521678313299046
232	232	hsa:336	4	1709	-0.012329069972619	0.326	122.132031042468	0.046	0.0779787768145067
233	233	hsa:348	7	2977	-0.0012063528710534	0.465	564.942877045748	0.064	0.134354200453953
234	234	hsa:351	3	131	-0.147425148922372	0.016	12.8385678218855	0.531	0.0490062857838438
235	235	hsa:26060	4	1715	-0.0312074233258641	0.072	148.439970808327	0.043	0.0209835868247964
236	236	hsa:353	2	187	0.0590008388204432	0.817	25.6459355074035	0.079	0.24141816110136
237	237	hsa:359	3	1136	0.0177738246912475	0.741	53.3740014401529	0.211	0.446484014455487
238	238	hsa:364	4	1656	-0.0119459563058159	0.315	139.650398090075	0.006	0.013742527270331
239	239	hsa:367	2	283	-0.0888003451364796	0.036	21.2758046001039	0.751	0.124651802223928
240	240	hsa:116985	2	110	-0.147776967801892	0.041	14.3784350922255	0.131	0.0334438268136439
241	241	hsa:116984	3	850	-0.035832158655576	0.115	83.6921199223127	0.04	0.0293558152872406
242	242	hsa:64411	2	110	-0.150660420832173	0.035	15.3050645082065	0.929	0.143913137930348
243	243	hsa:23237	5	3006	-0.0251938600690066	0.053	155.796834682171	0.16	0.0489299801514322
244	244	hsa:383	4	2268	-0.00921987855636811	0.307	121.82096715744	0.058	0.0895324817557847
245	245	hsa:384	5	3061	-0.0147060890757543	0.178	318.56031437143	0.214	0.162567170812037
246	246	hsa:79658	2	154	-0.164924355908989	0.027	21.7430679930476	0.032	0.00695860224983444
247	247	hsa:2909	4	2154	-0.0108678137546736	0.299	115.363091818717	0.191	0.220600277219698
248	248	hsa:394	3	1066	-0.00732787915818933	0.393	86.162189624067	0.000999000999000999	0.00347170956588036
249	249	hsa:396	2	262	-0.0616148414469863	0.109	26.6836496343602	0.404	0.181549322022775
250	250	hsa:397	3	1316	0.00992997726146593	0.642	123.957307982509	0.001	0.00536129208724411
251	251	hsa:398	2	262	-0.0619515345696474	0.109	23.0009618787228	0.427	0.18930800508904
252	252	hsa:9138	2	143	-0.105927741607164	0.061	19.4543186083352	0.041	0.0174846526323437
253	253	hsa:9826	2	86	-0.0471768097052861	0.301	12.1058315949907	0.01	0.0204855037526663
254	254	hsa:23365	2	163	-0.135794655595084	0.014	15.8777915668692	0.005	0.000739691072114044
255	255	hsa:9181	5	2907	-0.0205392279643775	0.118	353.385766021989	0.654	0.2748649464133
256	256	hsa:50649	4	2046	-0.0391004293388001	0.027	126.891651260819	0.003	0.000844105973666639
257	257	hsa:9459	3	1212	-0.0403763948745099	0.038	115.602918685814	1	0.162266426531719
258	258	hsa:8874	3	923	-0.0632847148961951	0.01	76.2347636597629	0.918	0.0522408837225306
259	259	hsa:405	7	3532	-0.0170547650344825	0.13	281.678360520472	0.386	0.200325521875041
260	260	hsa:9915	5	3010	-0.0177787264536706	0.143	273.45119078785	0.183	0.121507371528388
261	261	hsa:406	6	3349	-0.0220075597941988	0.08	351.037349610928	0.184	0.0768170289988304
262	262	hsa:10552	2	101	-0.0753218015516876	0.181	9.80952326604408	0.019	0.0229469838689626
263	263	hsa:10109	5	2810	-0.0217368140341346	0.117	381.497427150968	0.948	0.35481830092302
264	264	hsa:10094	2	101	-0.0722263850495634	0.191	15.1595092976263	0.004	0.00624718427536149
265	265	hsa:10093	1	8	NA	1	1.12505868338617	0.037	0.158982982554503
266	266	hsa:10092	2	101	-0.0722263850495634	0.193	14.0008359281664	0.316	0.231576202545955
267	267	hsa:81873	11	3616	-0.0122042588218749	0.249	474.821778352294	0.461	0.363268112948332
268	268	hsa:408	2	142	-0.077425811164885	0.153	18.1361334130628	0.888	0.407062251805308
269	269	hsa:409	2	189	-0.0334247164428661	0.308	38.8111685455155	0.007	0.0153927633495167
270	270	hsa:410	4	351	-0.0903637360387427	0.025	30.2242854233487	0.913	0.109101191308338
271	271	hsa:411	4	90	-0.134944950896493	0.062	9.26618706076359	0.997	0.233881020658405
272	272	hsa:22901	4	90	-0.140843366629931	0.047	6.41169669528572	0.286	0.0713685669369287
273	273	hsa:427	4	1680	-0.0165436311716095	0.197	274.685928202769	0.989	0.513504289745597
274	274	hsa:50807	5	2345	-0.0462062830115067	0.007	398.924351331723	0.044	0.00279830651869714
275	275	hsa:8853	5	2345	-0.0467599614172753	0.006	255.406833935174	0.979	0.0360500270270123
276	276	hsa:55616	5	2345	-0.0477724840382049	0.006	261.770337501088	0.997	0.0366038599069083
277	277	hsa:432	6	3067	-0.0220105866410396	0.072	499.913649797895	0.305	0.105814977265004
278	278	hsa:433	6	3067	-0.0215431023500927	0.076	459.690138354726	0.048	0.0241263260022972
279	279	hsa:434	6	2763	0.00458180451367118	0.608	368.069508497224	0.029	0.0888307185648771
280	280	hsa:435	11	3622	-0.0217690147321344	0.076	413.607679590974	0.705	0.210386125048503
281	281	hsa:440	2	76	0.0770442599165761	0.815	8.76195371626014	0.007	0.0351793821467865
282	282	hsa:443	3	429	-0.0277683731573852	0.264	42.9574297814764	0.206	0.212733092595367
283	283	hsa:445	3	1087	-0.0263111655161605	0.119	92.4043206772816	0.249	0.133900538343506
284	284	hsa:466	1	4	NA	1	0.716142650554392	0.197	0.517036655398097
285	285	hsa:1386	9	3595	-0.0150410885014735	0.17	366.963703096892	0.591	0.33133962151944
286	286	hsa:467	4	2398	-0.00951517949277168	0.291	216.544660757174	0.31	0.307220528546819
287	287	hsa:468	5	3343	-0.0163444385486738	0.14	306.267590482804	0.5	0.256148202585295
288	288	hsa:22926	1	3	NA	1	0.456245493870942	0.117	0.368033017269573
289	289	hsa:83734	6	2586	-0.0515876771097315	0.002	206.953112050119	0.869	0.0127830251982175
290	290	hsa:9140	4	2117	-0.0654476244789068	0.001	197.058511726617	0.951	0.00756805466714336
291	291	hsa:22863	13	3627	-0.0134873375468789	0.225	419.485579283724	0.612	0.410714743146185
292	292	hsa:55054	6	2455	-0.0557405156216578	0.003	247.216531390441	0.984	0.020148204042864
293	293	hsa:89849	6	2455	-0.0544372038115542	0.003	343.694533134895	0.99	0.0202530041787176
294	294	hsa:64422	6	2117	-0.0619076389649723	0.001	266.244793661605	0.581	0.00490989144444628
295	295	hsa:9474	5	2455	-0.0541258842086724	0.003	336.390640381187	0.533	0.0118939645753634
296	296	hsa:10533	5	2117	-0.0633064771748225	0.001	235.159914666529	0.679	0.00563222992324539
297	297	hsa:471	2	211	-0.106804212351384	0.031	22.083444442748	0.04	0.00953887843521284
298	298	hsa:472	2	163	-0.103781351578927	0.057	19.6261274874101	0.029	0.0122407351996168
299	299	hsa:479	7	3137	0.00970607585540528	0.718	221.249567426727	0.079	0.219491061885662
300	300	hsa:476	2	424	-0.0476030235398313	0.1	37.8872445502536	0.65	0.242668920590623
301	301	hsa:477	4	2799	0.00452635350307509	0.582	247.341063140615	0.001	0.00491734134415551
302	302	hsa:478	2	424	-0.0469859473087594	0.101	31.9244808665077	0.007	0.00583591728369186
303	303	hsa:480	2	424	-0.0475148697925353	0.1	60.3040915939078	0.48	0.193754604867564
304	304	hsa:481	2	424	-0.0469859473087594	0.101	38.7067211091405	0.101	0.0569753344171982
305	305	hsa:482	2	424	-0.0470741010560553	0.102	48.2451970502683	0.023	0.0165511321184495
306	306	hsa:483	2	424	-0.0475148697925353	0.1	55.5285376113458	0.045	0.0288165504699264
307	307	hsa:488	3	755	-0.0489381262296536	0.056	93.6813504705807	0.993	0.216283323522653
308	308	hsa:489	4	1345	-0.00514354778366881	0.393	131.813481602406	0.057	0.107494551442713
309	309	hsa:490	2	158	-0.0875511062653729	0.081	15.6957782203115	0.703	0.220124811997272
310	310	hsa:493	2	141	-0.0603697011150766	0.187	12.9338922322292	0.905	0.469875392306641
311	311	hsa:495	3	45	-0.0632034754054022	0.302	3.14388829563339	0.383	0.365163177747245
312	312	hsa:498	3	45	-0.0632034754054022	0.301	7.81928876961439	0.001	0.00274162848825784
313	313	hsa:506	3	45	-0.0632034754054022	0.298	7.22393482240158	0.000999000999000999	0.00271487126712688
314	314	hsa:513	3	45	-0.0632034754054022	0.302	7.07068145943927	0.14	0.176030290468199
315	315	hsa:515	3	45	-0.0632034754054022	0.302	10.860347803491	0.000999000999000999	0.00274728978857002
316	316	hsa:516	2	42	0.015753443429241	0.546	4.69987861806004	0.025	0.0722633150878435
317	317	hsa:517	2	42	0.0346575755443302	0.607	6.4441693662109	0.003	0.013308540819869
318	318	hsa:518	2	42	0.0346575755443302	0.604	7.79932937628678	0.000999000999000999	0.00507633692273624
319	319	hsa:10476	3	45	-0.0632034754054022	0.302	6.71638072696773	0.000999000999000999	0.00274728978857002
320	320	hsa:521	3	45	-0.0591258318308601	0.317	6.14030209992189	0.000999000999000999	0.00286839343272844
321	321	hsa:522	3	45	-0.0632034754054022	0.299	6.74081178948364	0.002	0.00503630804280016
322	322	hsa:9551	3	45	-0.0632034754054022	0.299	5.20644914992604	0.183	0.213701666369889
323	323	hsa:10632	3	45	-0.0632034754054022	0.301	8.65563308402296	0.000999000999000999	0.00273919014771038
324	324	hsa:539	3	45	-0.0632034754054022	0.299	9.4979637676221	0.000999000999000999	0.00272298089808901
325	325	hsa:537	2	192	0.079584766484195	0.921	23.0026190038014	0.064	0.225824333486061
326	326	hsa:535	2	55	0.112645378584442	0.846	7.2655968216736	0.03	0.118620887067742
327	327	hsa:23545	4	234	0.0433124286759018	0.756	17.9880521963055	0.302	0.565538450640747
328	328	hsa:50617	13	3625	0.00218394278634897	0.553	343.635753618682	0.464	0.605625887737711
329	329	hsa:533	3	69	0.103200337129794	0.798	8.91520768874641	0.089	0.258858541788542
330	330	hsa:527	3	69	0.0979080121487789	0.784	7.53115140958936	0.02	0.0808361900604589
331	331	hsa:9114	2	55	0.0981104910251593	0.811	7.83984484448824	0.007	0.035034653778163
332	332	hsa:245972	3	69	0.0979080121487789	0.785	4.00957050910888	0.166	0.395860806843358
333	333	hsa:8992	3	45	-0.0632034754054022	0.298	8.5267574413426	0.000999000999000999	0.00271487126712688
334	334	hsa:155066	3	45	-0.0591258318308601	0.316	6.03350148513353	0.384	0.377273760078921
335	335	hsa:523	4	192	0.124136654736101	0.965	22.6262388920403	0.024	0.110365010984583
336	336	hsa:525	1	3	NA	1	0.521133072194955	0.1	0.330258509299405
337	337	hsa:526	6	2564	0.0249139716589225	0.935	346.836409816907	0.019	0.08936727750453
338	338	hsa:528	3	45	-0.0591258318308601	0.317	5.71713236221824	0.75	0.579286333564091
339	339	hsa:245973	3	45	-0.0632034754054022	0.303	2.49952874291287	0.487	0.429920984663808
340	340	hsa:51382	2	42	0.0220548208009374	0.568	7.22024859069681	0.001	0.0048128850310901
341	341	hsa:529	3	45	-0.0632034754054022	0.3	3.7553932603566	0.019	0.0351535478936073
342	342	hsa:90423	5	1147	0.0427375578524246	0.938	134.266338846881	0.192	0.488828312110194
343	343	hsa:9296	3	45	-0.0591258318308601	0.319	4.33690907114601	0.000999000999000999	0.00288448626054794
344	344	hsa:9550	1	3	NA	1	0.499849568211622	0.023	0.109762004450219
345	345	hsa:534	5	1147	0.0418608029762251	0.932	93.3747510078335	0.015	0.0736763830396271
346	346	hsa:51606	2	55	0.112645378584442	0.846	5.96131300712381	0.001	0.00683144255381092
347	347	hsa:545	9	3570	-0.0315624328804344	0.012	318.560280414129	0.31	0.0245297975917932
348	348	hsa:549	2	22	0.0775403508665393	0.647	3.46086420166901	0.032	0.10098227677918
349	349	hsa:6790	3	41	0.0880980496627786	0.739	12.2964149451172	0.000999000999000999	0.00606202374575527
350	350	hsa:551	3	66	-0.0508961031713162	0.353	9.42219387296361	0.215	0.271583007470997
351	351	hsa:8312	1	17	NA	1	2.46530044823807	0.007	0.0417329159094878
352	352	hsa:8313	4	2465	-0.0337694563073295	0.021	223.220953349604	0.624	0.0699077139005231
353	353	hsa:64343	2	40	0.131870675596141	0.807	5.35107487608248	0.011	0.0508145366831854
354	354	hsa:8706	11	3590	-0.00037822596795905	0.5	620.986783840152	0.371	0.498011923631377
355	355	hsa:8707	7	3220	-0.00806827244502777	0.312	222.299329811167	0.077	0.113602335605986
356	356	hsa:8705	6	2074	0.0101200327293917	0.722	256.108048953379	0.144	0.339317462919703
357	357	hsa:10317	6	2563	-0.010462030378517	0.311	165.244303083867	0.138	0.178043776262225
358	358	hsa:10678	5	1129	0.0297361638853563	0.876	139.769679554423	0.116	0.333966499302041
359	359	hsa:10331	6	2562	-0.0106586776855451	0.299	279.094974145333	0.059	0.0888670586269219
360	360	hsa:79369	6	2562	-0.0117500665118965	0.282	217.517239623554	0.155	0.180530096557373
361	361	hsa:84002	5	1133	0.0300912799422707	0.882	126.626080846131	0.103	0.30874826296412
362	362	hsa:2583	2	34	0.0260587701664701	0.59	3.5630458480165	0.141	0.290052594191797
363	363	hsa:8704	6	3220	-0.00794247567825824	0.321	244.369789241304	0.199	0.239595092529202
364	364	hsa:8703	14	3662	-0.0109315125089748	0.213	473.872550695095	0.56	0.37290287026494
365	365	hsa:8702	7	2563	-0.0106477804411252	0.308	312.577936694987	0.288	0.303585030954796
366	366	hsa:9334	4	72	-0.162841408869979	0.027	6.9041248420696	0.000999000999000999	0.000310747428763149
367	367	hsa:9331	4	271	-0.0723028281619212	0.076	28.1341139888826	0.316	0.11357250465825
368	368	hsa:570	13	3633	-0.00131837896243347	0.507	245.301986923889	0.514	0.611044011339434
369	369	hsa:572	2	345	-0.0704357371039004	0.044	38.8217955709599	0.128	0.0348017649978319
370	370	hsa:9530	5	2548	-0.0348909127453962	0.043	182.561603886097	0.924	0.167891474461833
371	371	hsa:10458	2	185	-0.0178063560587021	0.382	16.3898528331294	0.006	0.0162235334604571
372	372	hsa:25805	6	3213	-0.0159217933702396	0.144	346.466639035369	0.184	0.122696656724648
373	373	hsa:581	4	2346	-0.0429932507636329	0.008	239.319051877781	0.452	0.0239465508006112
374	374	hsa:8424	1	5	NA	1	0.548852368632233	0.066	0.245394635439077
375	375	hsa:9564	2	342	-0.00189794523031143	0.481	39.7625498243275	0.009	0.027889230597851
376	376	hsa:586	2	6	0.182574185835055	0.748	1.81460628533288	0.01	0.0440985082027282
377	377	hsa:587	2	6	0	0.601	1.69911586692733	0.006	0.0238903130920488
378	378	hsa:593	2	42	-0.0876961655188812	0.27	5.31453888976735	0.001	0.00248861392172079
379	379	hsa:594	2	42	-0.0676513276859941	0.317	10.2080795382828	0.000999000999000999	0.00286839343272844
380	380	hsa:8915	4	2288	-0.0488843697836073	0.01	361.529081296123	0.979	0.0550823955216849
381	381	hsa:596	3	1823	-0.0310961093824167	0.062	217.274654829496	0.000999000999000999	0.000662079212529112
382	382	hsa:597	4	2232	-0.04940915108241	0.005	312.197878142702	0.001	6.60303632276508e-05
383	383	hsa:598	4	2697	-0.0446813488603797	0.009	314.459120648095	0.956	0.0495205634934295
384	384	hsa:10018	9	3578	-0.0365014952607803	0.001	410.712164863499	0.431	0.00377099246364789
385	385	hsa:599	8	3345	-0.0239438830179601	0.064	368.346782329948	0.596	0.162737058386777
386	386	hsa:604	4	2044	-0.0539537960645107	0.004	160.827825929964	0.023	0.000947022422244202
387	387	hsa:613	5	3120	-0.0325212664039741	0.048	214.016352828497	0.805	0.164353975298805
388	388	hsa:622	2	14	-0.0662993544131796	0.417	3.10277690171042	0.000999000999000999	0.00365902871110879
389	389	hsa:623	4	2336	-0.0157678791865869	0.176	313.398674755398	0.195	0.150047966789717
390	390	hsa:624	4	2336	-0.0159174935433882	0.171	325.210146633698	0.039	0.0400825930347089
391	391	hsa:627	1	12	NA	1	1.55207228618016	0.000999000999000999	0.00790085392538984
392	392	hsa:8678	3	28	-0.0918458457365144	0.31	4.37421599668943	0.324	0.33127068015694
393	393	hsa:8553	7	3349	-0.0226866355121734	0.071	454.325837581117	0.14	0.0557752112876377
394	394	hsa:79365	2	16	-0.423911375998397	0.018	2.68163820864825	0.387	0.041564130469629
395	395	hsa:635	6	3177	-0.0124575556321424	0.245	445.619237782831	0.029	0.042253126056362
396	396	hsa:637	3	364	-0.0458579950864094	0.159	27.3180933644872	0.037	0.0360962551107562
397	397	hsa:329	4	2496	-0.048625906546573	0.005	278.047962841234	0.989	0.0311998757622724
398	398	hsa:330	4	2362	-0.0444548383889535	0.019	391.837031637361	0.001	0.000225550359997159
399	399	hsa:332	4	2042	-0.0384579877680924	0.013	365.032396658615	0.967	0.0675862555651765
400	400	hsa:641	3	31	-0.0217853484932634	0.45	11.2733208441786	0.000999000999000999	0.00391435376022962
401	401	hsa:29760	5	3046	-0.0199370781767039	0.158	273.919015569158	0.637	0.331743897168124
402	402	hsa:644	4	1369	0.0185693937063574	0.781	194.537095530761	0.009	0.0418767494296115
403	403	hsa:645	13	3643	0.00345863117521436	0.616	353.70585980424	0.471	0.649151882268214
404	404	hsa:90427	7	3371	-0.0366487885137743	0.007	315.175721222416	0.58	0.0264166835597961
405	405	hsa:648	8	3291	-0.0359045634627041	0.006	304.981072112035	0.902	0.0336579671096615
406	406	hsa:650	2	59	0.0752164225946493	0.787	7.12427165059396	0.044	0.151085173171668
407	407	hsa:652	4	2017	-0.0112367219308315	0.268	169.990119301731	0.049	0.0700290594643295
408	408	hsa:653	4	636	-0.0462662598457283	0.106	64.5363197097116	0.003	0.00287900001770854
409	409	hsa:654	6	2892	-0.0341376734978448	0.013	387.367099707174	0.029	0.00334899104468463
410	410	hsa:655	3	93	0.134146504218449	0.949	17.0185590188693	0.01	0.0536898331637593
411	411	hsa:656	4	636	-0.0472921638683945	0.1	80.7856670129153	0.024	0.0168774876999078
412	412	hsa:657	9	3569	-0.0251265409648578	0.039	521.952851409105	0.472	0.0919474064023929
413	413	hsa:658	5	2851	-0.0264128700579453	0.046	202.495909409792	0.209	0.0542665586200327
414	414	hsa:659	2	70	0.0529767235804164	0.708	12.7548438662186	0.000999000999000999	0.0058380406622771
415	415	hsa:9790	5	32	-0.0463353996900858	0.394	5.75540194996544	0.001	0.00348262890157454
416	416	hsa:664	4	2044	-0.054597838004911	0.004	161.431638381042	0.036	0.00141778040520791
417	417	hsa:669	3	286	-0.0853091315053349	0.053	28.363091178236	0.88	0.189605439810877
418	418	hsa:10380	5	1817	-0.00791204522959375	0.348	202.905143493132	0.029	0.0564749556088679
419	419	hsa:673	3	1774	-0.0378631032946407	0.032	261.224504725819	0.019	0.00511044409100685
420	420	hsa:672	3	111	0.0314999256597478	0.645	22.7576573907037	0.000999000999000999	0.00537860392933919
421	421	hsa:675	2	20	-0.145095250022002	0.238	4.5925718561479	0.000999000999000999	0.00222170726627469
422	422	hsa:83990	15	3621	-0.0259257518319011	0.048	313.113471718318	0.615	0.133509728483456
423	423	hsa:55845	5	2188	-0.0296259143387776	0.07	242.964308508228	0.998	0.255775766086697
424	424	hsa:683	2	92	0.035546976009706	0.69	7.81550414488304	0.217	0.434055532191032
425	425	hsa:685	3	854	-0.0034475237522008	0.439	96.1800612099583	0.001	0.00383291389260632
426	426	hsa:694	7	710	0.018146466887709	0.71	80.2598849530655	0.003	0.0152329789274255
427	427	hsa:7832	2	18	0.0381107966983353	0.602	4.31825094075671	0.035	0.102398199428068
428	428	hsa:10950	9	3087	-0.0235581249547107	0.053	326.200512856178	0.693	0.158088544750368
429	429	hsa:8945	4	2349	-0.0387263361067054	0.013	357.656609272867	0.439	0.0351897146208491
430	430	hsa:699	2	43	-0.186432441589148	0.093	10.1264328107991	0.001	0.000956310729027426
431	431	hsa:701	3	102	-0.0523650610942233	0.274	24.6646405654272	0.000999000999000999	0.00251920744737577
432	432	hsa:9184	11	3617	-0.0366941240260139	0.003	379.674072610627	0.708	0.0151960606689796
433	433	hsa:56913	3	72	-0.157435884511247	0.039	7.94323484750325	0.395	0.0796910377785107
434	434	hsa:29071	3	72	-0.145364123398564	0.047	7.04172379313634	0.891	0.174753496929863
435	435	hsa:712	5	1567	-0.0306635030759562	0.071	319.898540505922	0.000999000999000999	0.00074857336949968
436	436	hsa:713	5	1567	-0.0302704146164546	0.071	325.55992372123	0.003	0.00201374851755028
437	437	hsa:708	10	3574	-0.0328445298162551	0.012	415.180851379229	0.732	0.0503746886947842
438	438	hsa:714	5	1567	-0.030392766653518	0.07	329.595482700041	0.001	0.000739691072114044
439	439	hsa:715	4	600	-0.0277596931062271	0.256	91.5052945187324	0.000999000999000999	0.00237109005907828
440	440	hsa:716	5	624	-0.0263409023684365	0.251	127.947485190451	0.000999000999000999	0.00232972561129926
441	441	hsa:718	3	596	-0.0275406502680143	0.241	55.171937650988	0.000999000999000999	0.00224669616691151
442	442	hsa:719	2	18	-0.294117647058824	0.126	6.06077744422566	0.000999000999000999	0.00125625249457501
443	443	hsa:720	3	84	-0.0436962025896798	0.342	6.49194318532426	0.002	0.00566868600599374
444	444	hsa:722	3	29	-0.0945514381551959	0.251	3.67802857967516	0.000999000999000999	0.00232972561129926
445	445	hsa:725	3	29	-0.0742904156933682	0.306	2.98424135978133	0.005	0.011448205941674
446	446	hsa:727	4	600	-0.029899325702572	0.232	66.6139747763403	0.385	0.305075126381549
447	447	hsa:728	5	600	-0.0329736194866324	0.2	142.380412134526	0.000999000999000999	0.00190173680154832
448	448	hsa:729	5	600	-0.0304467284403236	0.223	58.6300296869153	0.000999000999000999	0.00209618625171299
449	449	hsa:730	6	600	-0.0327726926386082	0.213	71.7881558913448	0.000999000999000999	0.00201194946165957
450	450	hsa:773	3	1472	0.0100310614689954	0.673	86.6784775827471	0.000999000999000999	0.00558352313924398
451	451	hsa:774	2	207	0.0161212915606463	0.608	17.0527369552522	0.446	0.625046775007678
452	452	hsa:775	3	1676	-0.00453652626175541	0.414	145.155213799007	0.003	0.0095522621109748
453	453	hsa:776	4	2711	-0.0108540624280699	0.25	265.389671073074	0.2	0.1997866136777
454	454	hsa:8912	11	3617	-0.00109483965433873	0.46	361.815403463681	0.509	0.574072893199033
455	455	hsa:8911	12	3627	-0.0013524012159204	0.456	427.531747561238	0.431	0.516282316612717
456	456	hsa:9254	2	258	-0.0653058625713434	0.084	17.9397858621827	0.264	0.106638721490894
457	457	hsa:55799	4	2622	-0.0155666897799755	0.185	224.520790893848	0.129	0.113008944670232
458	458	hsa:93589	4	2622	-0.0154457878810395	0.186	344.564927409844	0.029	0.0335639926847032
459	459	hsa:783	3	1422	-0.00467599754042466	0.431	158.594230642911	0.001	0.00377099246364789
460	460	hsa:784	4	2622	-0.0152001821366603	0.19	345.275831848139	0.043	0.0474455296438005
461	461	hsa:785	2	258	-0.0669233452356491	0.08	12.3011676846632	0.102	0.0473974506576499
462	462	hsa:10368	3	1422	-0.00487711571420636	0.422	74.2326351838537	0.05	0.102513975232352
463	463	hsa:59285	2	258	-0.0661146039034962	0.082	19.4577872007722	0.825	0.249859046083315
464	464	hsa:790	2	91	0.0687317378135844	0.789	13.1608630506062	0.091	0.260909289772461
465	465	hsa:793	9	3564	-0.0200115527421779	0.151	240.610367242545	0.3	0.18547850556614
466	466	hsa:10203	2	65	-0.0493463771219827	0.357	11.6496210126372	0.004	0.0107835140327125
467	467	hsa:800	3	1264	0.00046200731124595	0.541	252.333620059928	0.002	0.00847091751463959
468	468	hsa:801	3	1848	0.00148332746555509	0.515	179.933831876472	0.01	0.0322841066061785
469	469	hsa:805	10	3617	-0.0105465077999967	0.26	609.173873677907	0.466	0.376885541358447
470	470	hsa:808	5	3269	-0.0143099789695853	0.181	267.710226342006	0.792	0.421806398439894
471	471	hsa:810	5	3269	-0.0149834158579632	0.169	263.716472017821	0.184	0.1390201435526
472	472	hsa:51806	8	3565	-0.00885638170494952	0.293	289.512398300147	0.351	0.336764723103677
473	473	hsa:811	4	1442	-0.0246900969146166	0.129	176.687029798345	0.805	0.339038958462332
474	474	hsa:50632	5	1860	0.0112297125140458	0.674	129.532494878056	0.001	0.00559573702131303
475	475	hsa:8536	5	2979	-0.0120589705851178	0.2	497.619806137351	0.308	0.233284953960068
476	476	hsa:57118	9	3572	-0.0176488676013568	0.116	296.130682099817	0.46	0.209741825296718
477	477	hsa:57172	4	2137	-0.00266366685951591	0.45	357.428152470054	0.007	0.0212951114023555
478	478	hsa:815	3	2189	0.00633868077424578	0.64	138.638809408663	0.007	0.0287084324018475
479	479	hsa:816	5	3361	-0.0204087840793142	0.089	222.008824993339	0.197	0.0884306741663109
480	480	hsa:817	5	3361	-0.0208981627186791	0.084	288.685811200295	0.373	0.139838329816498
481	481	hsa:818	5	3361	-0.0210282399847268	0.082	468.354280610129	0.131	0.0594418666137128
482	482	hsa:10645	12	3634	-0.0153997013510778	0.187	287.073964643786	0.445	0.290114756138979
483	483	hsa:820	5	1908	-0.0285293937691576	0.101	270.520219966575	0.024	0.0170221429749188
484	484	hsa:124583	2	214	-0.00235578982278409	0.47	26.7455304813797	0.005	0.0165753488844413
485	485	hsa:823	4	745	-0.0103410448630453	0.365	95.4363419665794	0.006	0.0156012396799867
486	486	hsa:824	2	119	0.0100159950848532	0.556	18.9788711426471	0.001	0.00472307669862482
487	487	hsa:84433	5	3165	-0.00587502862227018	0.331	451.055835962055	0.387	0.391332170509838
488	488	hsa:84674	3	451	-0.0642292979760378	0.058	59.4026585429187	0.477	0.126919187529946
489	489	hsa:22900	6	2750	-0.0378632960207994	0.014	312.336996408	0.241	0.0225776483388521
490	490	hsa:64170	3	1436	-0.0258396073466736	0.183	140.150086532335	0.001	0.00175790246613748
491	491	hsa:57571	6	3146	-0.00980140426605132	0.282	197.732435541959	0.239	0.249179837345509
492	492	hsa:22794	10	3061	-0.0230027655801437	0.064	323.696154757522	0.652	0.174280451780225
493	493	hsa:8573	4	138	-0.059827926158113	0.228	14.7021743144355	0.062	0.0743416557694856
494	494	hsa:834	4	1674	-0.0354656078130684	0.067	270.784879559998	0.003	0.00191195333563095
495	495	hsa:836	3	1649	-0.0359118578995141	0.04	132.764038505615	0.955	0.162919934960719
496	496	hsa:838	5	1613	-0.0272591198554705	0.14	199.397976973186	0.000999000999000999	0.0013811003686277
497	497	hsa:839	3	515	-0.0199457547689413	0.309	65.7636513990727	0.037	0.0625528168951722
498	498	hsa:840	4	1896	-0.0487313139487803	0.008	168.714474249899	0.812	0.0392135501200935
499	499	hsa:841	4	2536	-0.0533126342039358	0.005	363.03795697262	0.977	0.0308809475781859
500	500	hsa:842	2	336	-0.0777986660897884	0.035	44.8932255117932	0.026	0.00728188002219258
501	501	hsa:847	4	2219	-0.060038252094117	0.002	291.466697382679	0.733	0.0110319691123089
502	502	hsa:857	4	2136	-0.00282617889249603	0.417	353.218226021557	0.000999000999000999	0.00365902871110879
503	503	hsa:858	4	2136	-0.0039110475629064	0.389	290.775397955568	0.009	0.0232981279361706
504	504	hsa:859	4	2136	-0.00420626624976585	0.386	166.62342756834	0.397	0.440683675226965
505	505	hsa:867	2	587	-0.0307795084696844	0.183	62.8074703312962	0.1	0.0915156322101662
506	506	hsa:868	12	3634	-0.0167197487871873	0.222	313.130912722898	0.615	0.408390025308216
507	507	hsa:23624	3	1805	-0.0193325221109737	0.179	263.873310817143	0.000999000999000999	0.00172189134983989
508	508	hsa:873	4	1314	0.0217762483234637	0.824	114.70887407345	0.378	0.674787216320261
509	509	hsa:874	2	139	0.182539146759666	0.976	12.068751329906	0.084	0.287044936463282
510	510	hsa:875	3	181	-0.0670146409659347	0.137	12.8074312717156	0.428	0.224951527813801
511	511	hsa:883	2	25	-0.25955427380922	0.071	2.93508430120606	0.154	0.060310610910421
512	512	hsa:56267	2	25	-0.227109989583068	0.113	4.17545301247907	0.322	0.156953601454242
513	513	hsa:8030	6	3303	-0.00864545464557195	0.31	373.469796827744	0.413	0.391194470163104
514	514	hsa:6356	2	69	-0.175063499050569	0.067	16.3692517164081	0.000999000999000999	0.000710281486919809
515	515	hsa:6357	4	1884	-0.0275699957142728	0.124	302.357966268596	0.000999000999000999	0.00123829403905479
516	516	hsa:6360	2	69	-0.183399856148215	0.053	4.36746382512124	0.263	0.0735012476299352
517	517	hsa:6361	2	69	-0.184789248997823	0.05	11.0219376546644	0.000999000999000999	0.000544679672970491
518	518	hsa:6362	2	69	-0.177842284749784	0.062	17.7025295543922	0.000999000999000999	0.000662079212529112
519	519	hsa:6363	4	1884	-0.0269784478497503	0.133	278.280717893308	0.000999000999000999	0.0013188605431569
520	520	hsa:6347	2	69	-0.184789248997823	0.052	24.243779786429	0.000999000999000999	0.000564429420244984
521	521	hsa:6364	2	69	-0.173674106200961	0.067	15.5098826356754	0.000999000999000999	0.000710281486919809
522	522	hsa:6366	2	94	-0.0797543944429314	0.193	17.1209727937432	0.000999000999000999	0.00184204518960315
523	523	hsa:6367	2	69	-0.183399856148215	0.053	15.9879236028765	0.000999000999000999	0.000574275286385112
524	524	hsa:6368	2	69	-0.191736213245861	0.047	16.7467368636561	0.000999000999000999	0.000514904131328276
525	525	hsa:6369	2	69	-0.188957427546646	0.049	11.083637998053	0.000999000999000999	0.000534775023225925
526	526	hsa:10344	2	69	-0.184789248997823	0.057	9.27307314969141	0.006	0.00307139933874837
527	527	hsa:10850	5	2550	-0.00443535091858425	0.387	136.560601753497	0.097	0.160756070861737
528	528	hsa:56477	2	69	-0.184789248997823	0.055	6.12930455255238	0.128	0.0419312756460378
529	529	hsa:6348	2	206	-0.00584115235431179	0.458	49.2594609447104	0.000999000999000999	0.00397587964073516
530	530	hsa:414062	2	206	-0.00584115235431179	0.459	51.8329945082869	0.000999000999000999	0.00398356050983087
531	531	hsa:6352	2	207	0.00842235887508717	0.558	48.4935851198716	0.000999000999000999	0.00473388642509606
532	532	hsa:6354	2	69	-0.175063499050569	0.066	12.105046802608	0.000999000999000999	0.000700671779094787
533	533	hsa:6355	2	69	-0.183399856148215	0.052	24.4057056043298	0.000999000999000999	0.000564429420244984
534	534	hsa:8900	6	3353	-0.0463925872607782	0.000999000999000999	268.685905416687	0.157	0.00153083065705595
535	535	hsa:890	3	635	-0.0347439847492876	0.16	123.123337513042	0.000999000999000999	0.00155705674214802
536	536	hsa:891	2	137	0.0251899824043542	0.62	28.7835278282098	0.000999000999000999	0.00519461554421588
537	537	hsa:9133	2	136	0.0374650752627375	0.693	33.7956861726184	0.000999000999000999	0.00572917850245901
538	538	hsa:85417	11	3629	-0.0360218948584574	0.002	264.633377567183	0.351	0.0057996271620648
539	539	hsa:595	4	2897	-0.0363078637453707	0.008	393.03574542414	0.786	0.0381625776636017
540	540	hsa:894	4	2745	-0.0458427053534035	0.002	392.798295872358	0.008	0.000192686749371592
541	541	hsa:896	4	2690	-0.0414483437793161	0.005	352.99243741737	0.243	0.0093713086106604
542	542	hsa:898	2	97	0.0518640696816897	0.711	21.705994519085	0.000999000999000999	0.00585977477908024
543	543	hsa:9134	3	704	-0.0503847736772505	0.106	127.784535855231	0.000999000999000999	0.00107515037183181
544	544	hsa:900	3	590	-0.0236957296608942	0.235	68.5468566562047	0.06	0.074188284790532
545	545	hsa:901	9	3578	-0.0325133320477593	0.006	574.182608753474	0.596	0.023721433267895
546	546	hsa:902	2	47	-0.0128240702861006	0.445	6.49256593295629	0.002	0.0071416172947619
547	547	hsa:1230	1	50	NA	1	15.8014233042545	0.000999000999000999	0.00790085392538984
548	548	hsa:2826	4	2469	-0.00441126120515949	0.392	169.265573882951	0.181	0.258673373689496
549	549	hsa:729230	2	283	0.0835826739742141	0.869	57.5927965302698	0.000999000999000999	0.00698773832647831
550	550	hsa:1232	1	50	NA	1	6.75378868714224	0.000999000999000999	0.00790085392538984
551	551	hsa:1233	4	2469	-0.00555693230021011	0.372	303.005065485884	0.002	0.0061033813252096
552	552	hsa:1234	2	298	0.0742508669263172	0.854	36.8845038283788	0.000999000999000999	0.00688197637391659
553	553	hsa:1235	20	3707	-0.0039497171557939	0.423	465.612859924137	0.489	0.532791515403642
554	554	hsa:1236	4	2469	-0.00533976777920798	0.374	256.722220596161	0.001	0.0033253292804456
555	555	hsa:10803	2	283	0.084603106175897	0.875	19.54990198281	0.135	0.370441404880497
556	556	hsa:929	3	1133	-0.0469827962032478	0.047	262.651519044647	0.000999000999000999	0.000514904131328276
557	557	hsa:930	4	2435	-0.0164548559000122	0.214	414.904958742342	0.001	0.00202220039218968
558	558	hsa:30835	4	2171	-0.0280803625014647	0.083	412.619333477673	0.001	0.000862923605863918
559	559	hsa:933	3	561	-0.0800594893324092	0.053	65.4706502001335	0.000999000999000999	0.000574275286385112
560	560	hsa:10666	3	498	-0.0524178685901941	0.071	80.1024475412061	0.000999000999000999	0.00074857336949968
561	561	hsa:51744	1	5	NA	1	0.580508236016041	0.006	0.0366959748585245
562	562	hsa:919	4	2255	-0.036884461808176	0.074	446.878952790407	0.000999000999000999	0.000777143783633263
563	563	hsa:29126	4	718	-0.0561646785276455	0.08	99.1916589996816	0.000999000999000999	0.000833924749140737
564	564	hsa:947	4	73	-0.10985839289109	0.148	16.2994011722609	0.000999000999000999	0.00145180426784308
565	565	hsa:948	4	2037	0.000781936815031307	0.507	112.830612182894	0.207	0.341533511597494
566	566	hsa:952	5	3204	0.000357411951006042	0.506	618.455401893197	0.053	0.123863813208894
567	567	hsa:915	4	2455	-0.0278272240540742	0.101	435.117366254127	0.000999000999000999	0.00102931103265441
568	568	hsa:916	4	2465	-0.0236182351553004	0.155	408.854312425491	0.000999000999000999	0.00151331485106255
569	569	hsa:917	4	2455	-0.0269485251625857	0.111	416.895597453733	0.000999000999000999	0.00112075401011522
570	570	hsa:920	5	2537	-0.0186422428306665	0.217	433.773874196465	0.000999000999000999	0.00204569925767457
571	571	hsa:958	3	848	-0.0354376323374685	0.106	97.21600161244	0.005	0.0045275957822516
572	572	hsa:959	5	2462	-0.0194504954865827	0.205	273.760754614043	0.000999000999000999	0.00194422329293465
573	573	hsa:960	2	200	0.129370904797747	0.946	33.9767907213143	0.005	0.0300536162617423
574	574	hsa:4179	4	596	-0.0316267905740254	0.208	108.585105147768	0.002	0.00365448732384446
575	575	hsa:961	2	36	-0.182405837080181	0.102	3.41903090256136	0.785	0.28223506193369
576	576	hsa:962	3	55	-0.23772385847993	0.012	15.6142185749598	0.000999000999000999	0.00014783140949262
577	577	hsa:1604	4	1827	-0.00896804014514451	0.346	173.868080494071	0.281	0.32383230208423
578	578	hsa:967	13	3655	-0.0130244577357344	0.265	292.167939625281	0.474	0.386197166065644
579	579	hsa:971	3	538	-0.0813801136418444	0.039	90.6771751026042	0.000999000999000999	0.000434530457616924
580	580	hsa:972	2	67	-0.170530035045272	0.05	15.40805807103	0.002	0.00102103403719762
581	581	hsa:973	3	496	-0.00415005587566167	0.446	80.7560617874604	0.000999000999000999	0.00388353769570397
582	582	hsa:974	3	496	-0.00642123073298895	0.428	88.6711002791492	0.000999000999000999	0.00374441716008218
583	583	hsa:941	4	1513	-0.0246006136786007	0.172	247.580652970353	0.000999000999000999	0.00166140927074449
584	584	hsa:3732	9	3570	-0.0289726946959348	0.019	400.408313494848	0.331	0.0381676466963132
585	585	hsa:942	4	1513	-0.02850598003015	0.134	148.964969349599	0.000999000999000999	0.00132777404057785
586	586	hsa:925	3	325	-0.0638645768669372	0.156	62.042465067384	0.000999000999000999	0.00152207595600745
587	587	hsa:978	1	19	NA	1	4.04115857347607	0.021	0.102127889666433
588	588	hsa:8556	7	3331	-0.0370191337666331	0.004	201.521758288756	0.542	0.0154664040236375
589	589	hsa:8555	7	3331	-0.0368794445990038	0.004	484.262604607791	0.286	0.00889256869761206
590	590	hsa:8881	6	3331	-0.0367625025699224	0.004	407.987532395545	0.247	0.00782478992589381
591	591	hsa:991	2	80	-0.0196693028081176	0.44	21.0606130602183	0.000999000999000999	0.00383724629950991
592	592	hsa:8697	6	3331	-0.036869964474318	0.004	236.884380603275	0.861	0.022975343108683
593	593	hsa:993	3	562	-0.0197939909232375	0.307	103.744383512714	0.000999000999000999	0.00278773859079722
594	594	hsa:994	7	3514	-0.0278467957557685	0.036	776.155499162455	0.268	0.0544244127570461
595	595	hsa:995	1	22	NA	1	5.76123761197375	0.000999000999000999	0.00790085392538984
596	596	hsa:246184	6	3331	-0.0374803480912849	0.004	258.547602891872	0.763	0.0207290563212889
597	597	hsa:11140	2	96	-0.125007073936793	0.074	9.40138780592539	0.042	0.0210528953308497
598	598	hsa:998	2	732	-0.0632581685107576	0.016	98.1240973701588	0.69	0.0607887818289904
599	599	hsa:8318	3	14	-0.57953786404698	0.008	7.37975982296995	0.000999000999000999	0.000101794753379561
600	600	hsa:990	3	205	-0.0683831995476474	0.146	44.8578170902911	0.000999000999000999	0.00143416973200999
601	601	hsa:8317	3	14	-0.57953786404698	0.009	6.67066302172127	0.000999000999000999	0.000113460109219431
602	602	hsa:113130	2	2	NA	1	0.897748789556347	0.031	0.138686810309407
603	603	hsa:999	4	2157	-0.0201419334522924	0.144	269.485340139158	0.102	0.0766820006496876
604	604	hsa:1003	4	2153	-0.0161871867382141	0.188	277.386335299273	0.002	0.00334110645187997
605	605	hsa:10423	5	3148	-0.0192215163983973	0.142	325.510905376564	0.194	0.126495604502124
606	606	hsa:983	2	149	0.0781931580455118	0.87	35.2909351139398	0.000999000999000999	0.00699477987670769
607	607	hsa:1017	8	3555	-0.0403157904067286	0.001	546.796646545304	0.639	0.00533923230019193
608	608	hsa:1019	1	21	NA	1	4.72917874727382	0.000999000999000999	0.00790085392538984
609	609	hsa:1020	5	3000	-0.0325051299466601	0.052	274.70412003113	0.979	0.202498543401359
610	610	hsa:8851	6	3226	-0.0189426678337884	0.159	500.840232412366	0.656	0.340077514399502
611	611	hsa:1021	6	3390	-0.036313802470847	0.009	522.014680130976	0.073	0.00547138203643814
612	612	hsa:1022	6	3212	-0.0387313972317366	0.008	451.192271897491	0.429	0.0229072687181272
613	613	hsa:1026	2	529	-0.052834538585291	0.086	52.3946453207757	0.000999000999000999	0.000890255741793977
614	614	hsa:1027	2	366	-0.0561965438667665	0.1	43.632779436841	0.000999000999000999	0.00102011387335757
615	615	hsa:1028	5	2940	-0.0382164117142127	0.005	251.184712947082	0.33	0.0122215169852649
616	616	hsa:1029	1	6	NA	1	1.31342916144472	0.002	0.0144292161968444
617	617	hsa:1030	11	3629	-0.0320328104531559	0.008	407.230257633113	0.478	0.0251101364772244
618	618	hsa:1031	5	2897	-0.035737143890838	0.009	223.800426929192	0.906	0.0473685973845667
619	619	hsa:1032	11	3629	-0.0376696475635304	0.003	623.770828675213	0.482	0.0109013277084851
620	620	hsa:1036	6	3147	-0.00840895928321326	0.301	274.141649988921	0.065	0.0965339648012511
621	621	hsa:1040	3	561	-0.0121879025157059	0.395	73.5142567708425	0.024	0.0536432527265402
622	622	hsa:8760	2	125	-0.0192562337653088	0.404	14.1802666422562	0.08	0.143244471545041
623	623	hsa:1050	4	2253	-0.0418517921569887	0.018	276.164354031012	0.433	0.0456292019556795
624	624	hsa:1051	3	1188	-0.0403955606620949	0.085	193.301303951247	0.000999000999000999	0.000880897101052547
625	625	hsa:1054	4	2242	-0.0501235204688903	0.009	209.91761847827	0.921	0.0480167342529057
626	626	hsa:1056	3	463	-0.018181645266201	0.328	33.5730891956435	0.383	0.386226209313225
627	627	hsa:10390	3	803	-0.010145761317721	0.394	82.3765473209916	0.837	0.69561246830001
628	628	hsa:64781	3	89	-0.100210395518344	0.109	10.3099292311118	0.871	0.318474840631218
629	629	hsa:10715	4	1680	-0.0169673109741302	0.186	127.067900599644	0.96	0.486188631898358
630	630	hsa:29956	2	68	-0.081668498126171	0.219	6.05036966351561	0.544	0.372596598756784
631	631	hsa:204219	2	68	-0.0829857319669157	0.216	5.8462500749438	0.108	0.110996978335381
632	632	hsa:91012	2	68	-0.0829857319669157	0.212	6.158600224625	0.578	0.379782002405862
633	633	hsa:253782	4	1680	-0.0148749481505086	0.225	113.797398685769	0.25	0.218134644631741
634	634	hsa:8824	3	359	0.0106475847356691	0.578	51.6754978832739	0.239	0.411590378141238
635	635	hsa:629	5	596	-0.0335553473741724	0.186	100.5633789351	0.000999000999000999	0.00178209988964301
636	636	hsa:1675	4	596	-0.0355188985449249	0.181	80.6662452341662	0.000999000999000999	0.00173912123665605
637	637	hsa:3075	4	596	-0.0283894902440085	0.244	81.875116552399	0.301	0.265223327996478
638	638	hsa:3426	4	596	-0.0332588402166217	0.194	106.459033163861	0.000999000999000999	0.00185058788057083
639	639	hsa:1072	5	2935	-0.0270536591411804	0.053	313.374024289616	0.861	0.186507735879909
640	640	hsa:1073	3	796	-0.00332470120494528	0.457	83.9660620234889	0.001	0.00397170801535102
641	641	hsa:8837	4	2300	-0.046783517463031	0.008	330.651013344556	0.978	0.045774776325057
642	642	hsa:1080	4	2388	-0.00947058865146089	0.305	193.552499857098	0.074	0.108135887341606
643	643	hsa:1081	4	1337	-0.0141994394751095	0.248	67.4505600740837	0.201	0.199331031097642
644	644	hsa:57530	5	2852	-0.0219455442931677	0.081	417.384250943946	0.04	0.0218122695153364
645	645	hsa:9023	6	3025	0.00850458150908046	0.733	503.70815598031	0.04	0.132804511985575
646	646	hsa:1103	7	2164	0.0110236077731032	0.724	221.085940882788	0.082	0.227023227150484
647	647	hsa:57680	2	66	-0.115159064709154	0.175	8.61499860170256	0.233	0.171242201970121
648	648	hsa:1111	2	91	-0.0387503818023434	0.376	20.5200199744804	0.001	0.00334110645187997
649	649	hsa:11200	10	3597	-0.0287188030769714	0.018	314.238772596807	0.713	0.0687345068104771
650	650	hsa:1119	5	803	-0.021724224579029	0.261	81.9794893772824	0.167	0.180144911394206
651	651	hsa:1120	3	58	-0.138954944807096	0.108	8.63924218091803	0.065	0.0418321242678298
652	652	hsa:56994	4	2159	0.0109629127749984	0.726	189.776724465645	0.000999000999000999	0.00596825673482626
653	653	hsa:8646	6	2899	-0.0151029324345514	0.162	315.687097887844	0.109	0.0889356884405975
654	654	hsa:1131	2	204	-0.0222708964585308	0.362	16.1181329931108	0.069	0.117140821322017
655	655	hsa:1136	3	454	-0.0592046953221566	0.059	26.6320915771344	0.559	0.145506355500637
656	656	hsa:8973	3	454	-0.0588712416734821	0.059	39.9361621417932	0.016	0.00751932286587693
657	657	hsa:1139	3	454	-0.0620723967007573	0.052	30.0371271679629	0.086	0.0286651601968744
658	658	hsa:4261	2	124	-0.214346428783408	0.001	21.8607423428706	0.001	1.48155105579643e-05
659	659	hsa:9541	13	3634	-0.0170958639659722	0.159	370.365951216013	0.605	0.321423846870521
660	660	hsa:84916	8	44	-0.246543451293775	0.016	6.2689256064657	0.000999000999000999	0.000192510231145776
661	661	hsa:1154	4	2239	-0.0310144649157288	0.043	278.496241504548	0.082	0.0234394065535928
662	662	hsa:1152	4	91	0.00513522205982686	0.485	7.35954979570636	0.036	0.0881353340408441
663	663	hsa:1158	5	312	0.0294811032173219	0.725	30.9511889119528	0.03	0.105012078091482
664	664	hsa:548596	5	312	0.0257188703799649	0.703	37.8165529864335	0.001	0.00580688802730599
665	665	hsa:1159	2	6	-0.346410161513775	0.322	1.28121498988403	0.000999000999000999	0.00290860203906739
666	666	hsa:1160	3	21	-0.290276853415963	0.072	1.81273252707388	0.111	0.046587879387186
667	667	hsa:1163	2	70	-0.156447958970293	0.061	12.7588020433728	0.153	0.0529572971427954
668	668	hsa:1164	2	70	-0.156447958970293	0.061	13.6353519028576	0.077	0.0298768244842894
669	669	hsa:9635	2	8	NA	1	1.42970300022805	0.021	0.102127889666433
670	670	hsa:23529	2	113	-0.10490743014823	0.084	16.0324357752706	0.021	0.0129480622109453
671	671	hsa:9076	2	54	-0.153450079003793	0.101	5.90792147026838	0.086	0.0499101272819365
672	672	hsa:9071	5	2834	-0.012732178014563	0.209	209.528643607907	0.043	0.0513335300222791
673	673	hsa:5010	4	1672	-0.00103584005399432	0.459	214.145929152632	0.000999000999000999	0.00398356050983087
674	674	hsa:23562	2	54	-0.145530074926178	0.106	6.39724962585544	0.143	0.0786583003435921
675	675	hsa:24146	2	54	-0.181170093275447	0.057	4.55451623301497	0.953	0.212549619917737
676	676	hsa:10686	3	467	0.00309736084106835	0.522	43.2483763511516	0.008	0.0270538043650059
677	677	hsa:26285	2	54	-0.169290087159024	0.075	2.50528803095155	0.217	0.0832974858541941
678	678	hsa:51208	2	54	-0.193050099391869	0.043	3.23881744910422	0.659	0.129318362205428
679	679	hsa:149461	2	54	-0.153450079003793	0.107	3.07155333893993	0.168	0.0902164701679256
680	680	hsa:49861	4	1672	0.000770523498008581	0.489	124.906530892125	0.028	0.072443599200438
681	681	hsa:53842	5	2834	-0.0129029238506267	0.206	241.679272111983	0.024	0.0311945662828395
682	682	hsa:137075	6	3219	-0.0126283354906998	0.2	446.2374202481	0.091	0.0911152730651689
683	683	hsa:1365	2	54	-0.157410081042601	0.098	7.57307162897386	0.26	0.118988069702128
684	684	hsa:1364	2	54	-0.195030100411273	0.044	7.17212875413134	0.057	0.0175265802977783
685	685	hsa:7122	4	1672	-0.00148024528527043	0.461	235.098169114352	0.001	0.00400245386940008
686	686	hsa:9073	2	54	-0.173250089197831	0.069	4.62429204443723	0.751	0.20520315717266
687	687	hsa:9080	2	54	-0.153450079003793	0.089	5.20169285187923	0.342	0.136729427326698
688	688	hsa:64581	2	54	0.156193336473175	0.907	11.7903457750323	0.000999000999000999	0.00725452089972155
689	689	hsa:9575	12	3634	-0.0247222420878294	0.063	318.589143650378	0.681	0.177996546681233
690	690	hsa:10978	6	29	-0.0326850525394256	0.42	4.46177868116784	0.003	0.00967257088310362
691	691	hsa:1211	3	59	-0.164959774850608	0.077	4.1055529698373	0.775	0.227889402720739
692	692	hsa:1212	3	59	-0.176813171845861	0.049	5.36082297453587	0.812	0.168072068524704
693	693	hsa:1213	3	59	-0.174837605679986	0.057	6.54886715327098	0.159	0.0516913197617237
694	694	hsa:8218	3	59	-0.168910907182359	0.071	3.8836098786555	0.975	0.254082969957066
695	695	hsa:55907	2	5	-0.258198889747161	0.397	0.545543583375108	0.512	0.527114297312419
696	696	hsa:51727	3	396	-0.0526361526507781	0.148	43.1894374219613	0.255	0.161415291051435
697	697	hsa:129607	3	396	-0.0481259808195258	0.162	36.9142156484564	0.968	0.44734620175356
698	698	hsa:84735	6	3146	-0.00894008266976531	0.297	263.904930285116	0.398	0.370614394078761
699	699	hsa:55748	3	384	0.0834808111765303	0.972	50.1903206881271	0.025	0.114629877965846
700	700	hsa:1259	6	3269	-0.0144781061214068	0.175	438.26904729018	0.128	0.107490752770714
701	701	hsa:23019	11	3087	-0.0235167323493947	0.052	357.386251849659	0.34	0.0890244792009403
702	702	hsa:25904	11	3087	-0.0230496136746575	0.055	347.128185859103	0.707	0.165150299695288
703	703	hsa:4848	3	18	-0.107829063721912	0.319	2.95748621097894	0.001	0.00288705190620224
704	704	hsa:4849	5	30	-0.115825223766237	0.219	4.51645601579893	0.003	0.00547138203643814
705	705	hsa:4850	5	30	-0.0849384974285738	0.292	4.49474828855893	0.038	0.0610409889328788
706	706	hsa:57472	5	41	0.0814357929430566	0.774	6.82695177691249	0.022	0.0863812770217444
707	707	hsa:246175	4	30	-0.0947302820635626	0.249	5.3574507489855	0.000999000999000999	0.00231315208121512
708	708	hsa:29883	3	30	-0.0367923709675818	0.394	4.24302732771848	0.053	0.101671696044655
709	709	hsa:9337	4	41	0.0857591221437884	0.765	7.78455582956078	0.005	0.0251157028047664
710	710	hsa:1268	9	3566	0.00231374078803886	0.537	260.037130677515	0.342	0.494892750858944
711	711	hsa:1271	10	3596	-0.0178016427315796	0.233	276.26798040948	0.43	0.330695820081282
712	712	hsa:6900	2	5	-0.774596669241483	0.089	0.171103166913195	0.809	0.261441050599773
713	713	hsa:26047	9	3011	-0.00984236618969485	0.268	383.284718403143	0.058	0.0802704683320024
714	714	hsa:80347	2	44	0.0424251947400876	0.664	5.67057895933798	0.334	0.555790042662399
715	715	hsa:1301	3	975	0.0264938356382001	0.775	109.430452777779	0.000999000999000999	0.00632050594149012
716	716	hsa:1277	4	2192	-0.00660451581555927	0.357	427.512277739266	0.001	0.00319078559509792
717	717	hsa:1278	4	2192	-0.00591166007624375	0.372	437.316342200564	0.001	0.0033095414137731
718	718	hsa:81578	2	88	-0.0147887360614803	0.425	12.5190382337153	0.000999000999000999	0.00372115772026324
719	719	hsa:255631	2	174	0.0600465888807078	0.818	18.7565741764222	0.000999000999000999	0.00662706477157462
720	720	hsa:85301	2	174	0.0643938532340622	0.837	18.1175656768923	0.000999000999000999	0.00676179437741779
721	721	hsa:1280	5	3027	-0.0158202842651785	0.213	222.087043100716	0.748	0.451972779064806
722	722	hsa:1281	4	2192	-0.00611537533400696	0.369	445.966739817503	0.000999000999000999	0.00328292532453624
723	723	hsa:1282	3	975	0.0225790576647155	0.723	162.108608699311	0.000999000999000999	0.005946585319209
724	724	hsa:1284	3	975	0.0222643402197883	0.727	164.740892360397	0.000999000999000999	0.00597547778542989
725	725	hsa:1285	3	975	0.0244136300875838	0.749	98.6958872688111	0.007	0.0327732664533289
726	726	hsa:1286	2	174	0.0633070371457236	0.838	23.9067658784481	0.01	0.0484523837144107
727	727	hsa:1287	1	24	NA	1	4.80603042624305	0.008	0.0466265098984184
728	728	hsa:1288	1	24	NA	1	3.74282498753414	0.035	0.152334252612245
729	729	hsa:1289	4	2192	-0.00661682827619331	0.359	449.220843144308	0.001	0.00320665555284188
730	730	hsa:1290	4	2192	-0.00615231271590908	0.365	459.144839909954	0.000999000999000999	0.00325131232489603
731	731	hsa:50509	4	2192	-0.0060045631883006	0.368	331.229255264088	0.000999000999000999	0.00327502615405321
732	732	hsa:1291	4	2192	-0.00639072672636821	0.36	459.037794622959	0.000999000999000999	0.00321173443522977
733	733	hsa:1292	5	3027	-0.0154123105653038	0.218	219.155210089491	0.434	0.317704348569207
734	734	hsa:1293	4	2192	-0.00673099836570895	0.357	440.16033716844	0.000999000999000999	0.00318795446225457
735	735	hsa:256076	5	3027	-0.015382343424978	0.217	265.302107803757	0.246	0.209806296027411
736	736	hsa:131873	2	174	0.0646655572561469	0.842	18.827612573961	0.000999000999000999	0.00679717751957477
737	737	hsa:79709	6	2044	-0.0558909488102041	0.002	396.858602839103	0.404	0.00656172638755009
738	738	hsa:23127	6	2044	-0.0578471144901949	0.002	132.705759569452	0.273	0.00464803880389178
739	739	hsa:1311	2	164	0.0510335452004468	0.77	28.9227499722206	0.000999000999000999	0.0062847073411151
740	740	hsa:1312	6	3181	-0.00441894938392419	0.391	502.284768791911	0.361	0.417514077271076
741	741	hsa:1352	11	167	-0.0788390746520692	0.096	21.3169653833297	0.14	0.0713599480458431
742	742	hsa:1355	12	167	-0.056886039962874	0.161	20.0474759436155	0.204	0.145038650724409
743	743	hsa:1356	16	3413	-0.00385511140350853	0.423	294.771138491925	0.089	0.16111041213982
744	744	hsa:64506	6	3202	-0.0353850254546654	0.012	387.58543316324	0.111	0.0101512701775428
745	745	hsa:1373	10	3577	-0.008759920397166	0.295	338.735583226741	0.354	0.340362254467082
746	746	hsa:53981	14	3061	-0.0228062499252548	0.064	290.329260499426	0.938	0.228894663616722
747	747	hsa:51692	11	103	0.0156954338018956	0.582	12.4759588487319	0.003	0.012833846976452
748	748	hsa:10898	3	13	-0.12810252304407	0.283	1.912587975039	0.089	0.117911109168063
749	749	hsa:11052	17	3061	-0.0224815675031443	0.068	373.465637993721	0.172	0.0637257539654002
750	750	hsa:1374	4	2400	-0.0359593228765991	0.018	227.716796649599	0.201	0.0239577950212887
751	751	hsa:126129	4	2400	-0.0369169342268322	0.016	307.249062958885	0.32	0.0321259563004453
752	752	hsa:1376	4	1805	-0.00562153472956185	0.442	285.58596025844	0.022	0.0547768305558648
753	753	hsa:1378	2	68	-0.200643088476282	0.017	10.0269773107161	0.029	0.00424719568227335
754	754	hsa:1380	4	1419	-0.0299877706036203	0.124	186.01302036441	0.000999000999000999	0.00123829403905479
755	755	hsa:92359	5	1142	-0.0609910623337097	0.004	169.597410677629	0.073	0.00266851697266323
756	756	hsa:1385	4	2989	-0.0188210062323299	0.108	331.675529874153	0.984	0.344507620915497
757	757	hsa:10488	1	36	NA	1	3.48763339242895	0.049	0.196780814062704
758	758	hsa:64764	12	3655	-0.0111141107994471	0.256	309.583501787497	0.442	0.359712836680166
759	759	hsa:84699	5	3343	-0.0126803684169612	0.203	192.950875988133	0.164	0.146565970926364
760	760	hsa:148327	3	2109	0.00102756940438424	0.513	245.565237109766	0.026	0.0709199889751092
761	761	hsa:9586	4	2989	-0.012045769521843	0.214	222.11404071607	0.148	0.141013950909415
762	762	hsa:1387	11	3634	-0.0215628734949915	0.048	396.494561632918	0.452	0.104805291359295
763	763	hsa:1390	11	3620	-0.0142339667793063	0.174	419.872343986958	0.65	0.359599515521773
764	764	hsa:1392	5	3026	-0.0234221465254202	0.068	277.148359132456	0.779	0.20860330199603
765	765	hsa:1394	3	1100	-0.00499857882192832	0.384	113.414543543926	0.001	0.0034041093140646
766	766	hsa:1398	2	544	0.0426032994759403	0.85	77.0330185305216	0.111	0.317086197076261
767	767	hsa:1399	4	2717	-0.0106998602961776	0.262	397.785948830379	0.159	0.174058032229906
768	768	hsa:54675	6	3191	-0.0225970501537275	0.093	363.468417123835	0.968	0.306772892273561
769	769	hsa:23373	5	3007	-0.0269394799561314	0.048	297.31346724862	0.675	0.143518938140357
770	770	hsa:200186	5	3141	-0.0405634437693387	0.007	313.059326992869	0.869	0.0371200310564039
771	771	hsa:1407	4	1561	-0.0300469423731984	0.083	215.624147636944	0.159	0.0703105245756624
772	772	hsa:1408	4	1561	-0.0287794716058399	0.096	192.166046028477	0.161	0.0799037796713691
773	773	hsa:1431	2	66	-0.113442197472448	0.14	9.73179456881393	0.011	0.0115129982083372
774	774	hsa:51380	1	7	NA	1	1.3503363791241	0.086	0.296993086514662
775	775	hsa:1436	2	506	-0.00160948289573863	0.485	109.730995692498	0.000999000999000999	0.00418251265351603
776	776	hsa:1437	2	298	-0.0785295548705562	0.059	45.5940017804972	0.003	0.00170616686609411
777	777	hsa:1438	20	3707	-0.012680911023772	0.299	499.609809499165	0.466	0.413944782083314
778	778	hsa:1440	3	749	-0.030846069035732	0.15	55.055280690946	0.006	0.00721180421517597
779	779	hsa:1441	4	2445	-0.019848654869269	0.214	305.088748560428	0.001	0.00202220039218968
780	780	hsa:1445	3	934	7.2104682602486e-05	0.485	92.397938890178	0.000999000999000999	0.00418251265351603
781	781	hsa:1452	11	3617	-0.0196580072761255	0.115	568.829756617748	0.689	0.28012243976067
782	782	hsa:122011	2	104	0.0766354939840945	0.83	9.96297058978966	0.072	0.228128943792297
783	783	hsa:1453	4	2328	-0.0244214337666173	0.074	232.489835292083	0.002	0.00145310814606162
784	784	hsa:1454	4	2463	-0.0389101487015553	0.013	280.018244530416	0.935	0.0657587283286068
785	785	hsa:53944	2	41	0.0523311924317274	0.653	3.30001873802327	0.143	0.314788900908402
786	786	hsa:1455	11	3617	-0.013691392016275	0.193	284.170768049027	0.666	0.392237652926235
787	787	hsa:1456	11	3617	-0.0134081764973689	0.199	592.289696239543	0.779	0.444010324630635
788	788	hsa:1457	9	3574	-0.0323574465302671	0.012	397.645822169382	0.784	0.0533075615046658
789	789	hsa:1459	4	2417	-0.0401508809275652	0.01	334.716852244732	0.35	0.0232924730867037
790	790	hsa:1460	12	3634	-0.03280030962761	0.013	292.272676028193	0.66	0.0494063973158378
791	791	hsa:1477	7	103	0.019397544458057	0.598	10.4051846616501	0.027	0.0827657351170984
792	792	hsa:1478	4	28	-0.133857044618126	0.203	5.06650431633635	0.1	0.0994118281765682
793	793	hsa:23283	2	10	0.29277002188456	0.862	1.96404324197421	0.024	0.100920231741436
794	794	hsa:1479	3	13	-0.256205046088139	0.164	2.11621399893515	0.124	0.0995520931123846
795	795	hsa:1487	4	1818	-0.0358268756572552	0.063	199.9995506736	0.075	0.0300268444677221
796	796	hsa:1488	10	3582	-0.0274919563983511	0.05	344.065740546345	0.441	0.106158461029819
797	797	hsa:1489	3	603	-0.0305970671634777	0.169	101.79918702813	0.003	0.00435360877406716
798	798	hsa:1490	4	1884	-0.0488554342305264	0.005	324.589593946053	0.001	6.60303632276508e-05
799	799	hsa:1491	4	934	-0.025277119277377	0.151	107.118436855731	0.259	0.165877016608423
800	800	hsa:1493	3	552	-0.0593556214159214	0.102	124.718799544156	0.000999000999000999	0.00103849830069064
801	801	hsa:1495	2	225	-0.11830318049562	0.039	24.800731805163	0.236	0.0523534298510702
802	802	hsa:1499	12	3651	-0.0162736565872937	0.17	399.648137853438	0.686	0.367217078595599
803	803	hsa:56998	11	3597	-0.0183024051660082	0.134	266.3998529327	0.506	0.250273655751971
804	804	hsa:1500	3	1309	-0.0500635455964319	0.017	185.96759389558	0.003	0.000555067931187238
805	805	hsa:56474	4	962	-0.0326119713090178	0.148	68.8347506586485	0.52	0.274321570613196
806	806	hsa:1508	3	67	-0.176515492406451	0.038	9.20583734450982	0.185	0.0418817070693117
807	807	hsa:1509	3	39	-0.0536031542273238	0.351	4.16568239969872	0.122	0.177741416274323
808	808	hsa:1511	4	1678	-0.0270909619161739	0.096	231.934651220206	0.000999000999000999	0.000983224314900734
809	809	hsa:1520	3	67	-0.151885423698574	0.063	9.37167603466276	0.001	0.000672359677389084
810	810	hsa:2017	3	958	0.00706651697876608	0.599	118.543576842561	0.005	0.0203983790870071
811	811	hsa:8454	9	3587	-0.0402952369598171	0.003	288.626454839552	0.697	0.014992705987198
812	812	hsa:8453	12	3634	-0.0184281075467343	0.156	342.09878900993	0.626	0.324833560964447
813	813	hsa:6376	2	69	-0.184789248997823	0.052	13.3456566427707	0.000999000999000999	0.000564429420244984
814	814	hsa:1524	11	3620	-0.00950082555586206	0.32	282.122682468661	0.602	0.509905002992234
815	815	hsa:2919	3	1265	-0.0103664755922567	0.357	243.246847009064	0.000999000999000999	0.00318795446225457
816	816	hsa:3627	2	142	-0.0783636234587375	0.154	33.2339642688496	0.000999000999000999	0.00150454730090519
817	817	hsa:6387	4	1884	-0.0266020082995996	0.137	275.682420570292	0.001	0.00135568755960265
818	818	hsa:10563	2	69	-0.186178641847431	0.053	21.7845844666289	0.000999000999000999	0.000574275286385112
819	819	hsa:9547	5	2550	-0.00499854490091365	0.377	218.355903348765	0.071	0.123679211903844
820	820	hsa:58191	2	69	-0.184789248997823	0.055	16.9471806664267	0.000999000999000999	0.000593910817201368
821	821	hsa:2920	3	1003	-0.0146898821814567	0.32	195.693526065259	0.000999000999000999	0.00289252797202912
822	822	hsa:2921	6	3256	-0.0166833318101467	0.206	203.538521997105	0.3	0.233842048317243
823	823	hsa:6374	2	69	-0.176452891900177	0.064	18.5868174295766	0.000999000999000999	0.000681406719676336
824	824	hsa:6372	2	69	-0.176452891900177	0.066	17.4204171455739	0.000999000999000999	0.000700671779094787
825	825	hsa:4283	2	142	-0.0779500951027547	0.154	31.9749550058483	0.000999000999000999	0.00150454730090519
826	826	hsa:3577	2	285	0.0885543800121067	0.889	27.8662427293581	0.001	0.00713459244365838
827	827	hsa:3579	13	3659	-0.00670789499899144	0.363	409.929806454514	0.561	0.527717785813963
828	828	hsa:2833	4	2469	-0.00458567680470451	0.397	422.720323579456	0.000999000999000999	0.00350302876095029
829	829	hsa:7852	4	2513	-0.00393916799958319	0.4	416.758178522044	0.001	0.00352961840434252
830	830	hsa:643	1	50	NA	1	6.83182545286257	0.005	0.0314915868327402
831	831	hsa:10663	4	2469	-0.00417528715871622	0.401	406.969423497488	0.000999000999000999	0.00353430769333397
832	832	hsa:80319	4	1534	-0.0113546716928516	0.288	128.638564705788	0.15	0.178930718657226
833	833	hsa:1535	3	1282	-0.0338066935768963	0.067	147.445064509273	0.418	0.128136874188396
834	834	hsa:54205	3	1086	-0.0575626334505094	0.014	118.604717501305	0.622	0.0500145123848904
835	835	hsa:23191	1	9	NA	1	1.27668996019413	0.009	0.0513947763148133
836	836	hsa:26999	4	2019	-0.0372547839493332	0.036	207.827280993576	0.654	0.111807731206992
837	837	hsa:1540	3	792	-0.0397101839749151	0.09	86.7394583412689	0.03	0.018669159466124
838	838	hsa:1583	1	5	NA	1	0.678796375097005	0.066	0.245394635439077
839	839	hsa:1588	3	1238	0.028836437621066	0.853	71.7318879951696	0.046	0.166294945033485
840	840	hsa:1544	1	72	NA	1	9.50888600737934	0.001	0.00790775527898214
841	841	hsa:1545	4	1853	0.0453424601660309	0.981	248.018221529627	0.005	0.0309873384121574
842	842	hsa:1591	5	1262	-0.0483653924738943	0.05	160.808771744746	0.954	0.19284269912789
843	843	hsa:1592	1	41	NA	1	5.16333922973431	0.058	0.223144111569272
844	844	hsa:56603	5	2744	0.0217278551865766	0.9	426.176314667833	0.025	0.107870399319865
845	845	hsa:1593	4	1749	-0.00247916250591612	0.488	223.010262454502	0.2	0.324703271870958
846	846	hsa:1594	4	1262	-0.0526618006448089	0.034	92.9845617481907	0.659	0.107513544133135
847	847	hsa:1562	3	379	0.0134255901808761	0.605	39.3460164194764	0.000999000999000999	0.00508374162653471
848	848	hsa:1558	1	76	NA	1	8.56548891097924	0.028	0.128115421526594
849	849	hsa:1559	2	249	0.0230302533943037	0.681	23.04195063055	0.000999000999000999	0.00564185556364904
850	850	hsa:1571	20	3712	0.0153334864816764	0.816	290.54659895943	0.459	0.742363434379578
851	851	hsa:1572	1	20	NA	1	1.54855429607263	0.005	0.0314915868327402
852	852	hsa:1573	4	2453	0.0300015606188165	0.951	438.869047227954	0.008	0.0447240460880467
853	853	hsa:120227	5	1262	-0.0513895831044622	0.04	159.963317965823	0.313	0.0673629574746435
854	854	hsa:29785	3	379	0.0138681920549709	0.609	25.7271690752429	0.057	0.151370931811259
855	855	hsa:113612	2	184	-0.0648625889538325	0.172	16.8293917644998	0.523	0.306609144414579
856	856	hsa:51302	5	764	0.00424475809328143	0.562	54.6750985014074	0.244	0.409579461722297
857	857	hsa:1577	5	2984	0.00692650467059528	0.688	520.918455978202	0.284	0.514417795977489
858	858	hsa:1551	3	596	0.0243142000876724	0.744	62.7217667369172	0.001	0.0061033813252096
859	859	hsa:10858	1	3	NA	1	0.55269468845547	0.017	0.0862672128937407
860	860	hsa:8529	2	184	-0.0323437609660369	0.324	21.9591499395707	0.000999000999000999	0.00292466369607555
861	861	hsa:11283	2	162	-0.076007851643195	0.153	24.4881850573116	0.000999000999000999	0.00149577326368277
862	862	hsa:9420	2	45	0.0924114964568658	0.769	4.17633823218013	0.297	0.565658076689267
863	863	hsa:10800	5	2681	0.0103219730770917	0.707	448.721111987324	0.003	0.0151775951868105
864	864	hsa:57105	2	80	-0.00408176865761469	0.468	5.68830051363579	0.008	0.0246639770970533
865	865	hsa:23002	2	101	-0.108588050463578	0.091	11.4510139854924	0.691	0.236841992507731
866	866	hsa:23500	3	875	-0.0058850518976063	0.428	114.349289997507	0.000999000999000999	0.00374441716008218
867	867	hsa:1603	9	83	-0.158150061466157	0.037	12.64647123896	0.000999000999000999	0.000414192716672494
868	868	hsa:1605	6	3112	-0.0206517898349284	0.147	354.945596854578	0.719	0.343208065526903
869	869	hsa:1612	2	186	-0.0675632130987023	0.149	28.2570889964922	0.091	0.0718722556442611
870	870	hsa:23604	1	2	NA	1	0.27854176551828	0.028	0.128115421526594
871	871	hsa:1613	2	186	-0.0675632130987023	0.15	20.4829965954601	0.412	0.233842048317243
872	872	hsa:27071	3	1011	-0.0443667392812307	0.061	105.046515426959	0.7	0.177356856518521
873	873	hsa:1616	3	695	-0.0591685128591552	0.027	85.8368480718552	0.027	0.00599517704612164
874	874	hsa:26528	4	41	0.170517382539373	0.912	7.55955168630511	0.001	0.00729588195791563
875	875	hsa:1622	2	81	0.0597204277651744	0.743	12.2758137839295	0.074	0.214471004612768
876	876	hsa:1629	2	40	0.0447610545402139	0.605	8.14772456657143	0.000999000999000999	0.00508374162653471
877	877	hsa:1633	3	443	-0.0268600462994603	0.285	68.6525377230359	0.036	0.0572456950265974
878	878	hsa:1634	4	2287	0.000669765363285358	0.498	414.942832831013	0.000999000999000999	0.00428146170896484
879	879	hsa:1635	2	162	-0.156519497976411	0.012	25.2435967950732	0.000999000999000999	0.00014783140949262
880	880	hsa:79077	2	155	-0.0504820917999778	0.251	20.2470928370576	0.000999000999000999	0.00232972561129926
881	881	hsa:51181	4	464	-0.039389097444191	0.156	55.773708484189	0.606	0.31752511224332
882	882	hsa:1643	4	2001	-0.0315058674333374	0.051	174.786413824701	0.051	0.0180817860198331
883	883	hsa:1644	2	145	0.0507490905525266	0.79	8.64262206857157	0.149	0.369554230094913
884	884	hsa:1649	6	3411	-0.020335066076158	0.117	358.960348883377	0.5	0.224565618697543
885	885	hsa:54541	3	416	-0.0724380638396118	0.038	48.2412427041141	0.148	0.0347603249880405
886	886	hsa:8528	2	41	0.120562294994295	0.819	3.2034316533841	0.027	0.106398681004067
887	887	hsa:1654	5	1776	-0.049611319014039	0.016	158.746891527313	0.852	0.072186010930859
888	888	hsa:23586	2	210	-0.0959956642171972	0.048	21.2458845462537	0.000999000999000999	0.000524849984290404
889	889	hsa:8560	5	2196	0.013343034494671	0.746	477.252075667561	0.134	0.330175609755279
890	890	hsa:123099	3	173	-0.0670001481144283	0.133	28.6503788616334	0.648	0.297444316886505
891	891	hsa:51071	12	3629	-0.0134578351725447	0.161	366.320178442795	0.369	0.227138996992934
892	892	hsa:79139	2	25	-0.281183796626655	0.06	2.92180832408019	0.138	0.0479735939316435
893	893	hsa:51009	2	15	-0.248423601363248	0.164	1.86608884043627	0.013	0.0152452812553506
894	894	hsa:91319	7	2182	-0.0237013445830536	0.097	220.883071422601	0.002	0.00185224456538679
895	895	hsa:1676	4	1655	-0.0387645746490102	0.028	190.114049253898	0.054	0.0113314148658519
896	896	hsa:1677	5	1655	-0.0386130908171362	0.029	196.830893139053	0.161	0.0297266375848159
897	897	hsa:84649	5	2536	-0.0103829492811091	0.273	379.294691769665	0.001	0.00251324858223875
898	898	hsa:1606	4	2455	-0.00456291408896774	0.403	467.245665181714	0.411	0.463437950785727
899	899	hsa:1607	3	1161	0.0117205811169666	0.685	67.5273289764095	0.038	0.121000599726167
900	900	hsa:8527	20	3707	0.00157930401495664	0.536	363.641410845443	0.506	0.625109411562391
901	901	hsa:1608	3	1161	0.00913349523046876	0.649	72.4182158111262	0.008	0.0325052236674212
902	902	hsa:160851	4	2455	-0.00384905990771376	0.411	321.702142108267	0.148	0.23112845997995
903	903	hsa:1609	11	3618	-0.00417540160200688	0.41	488.273363097683	0.506	0.53375655859387
904	904	hsa:1716	2	147	-0.0715251455087465	0.165	15.7999843514177	0.274	0.185199915760715
905	905	hsa:1718	1	11	NA	1	2.90521888307007	0.005	0.0314915868327402
906	906	hsa:1717	1	5	NA	1	1.11170709438074	0.056	0.217414600941831
907	907	hsa:79947	1	6	NA	1	1.18105244463975	0.032	0.142144620037837
908	908	hsa:27294	3	224	0.0461050882860606	0.798	31.5017930346873	0.012	0.0540899910955166
909	909	hsa:1719	3	268	-0.0894440046074837	0.036	35.6619682814589	0.004	0.00141778040520791
910	910	hsa:200895	3	268	-0.094624320614643	0.028	19.0106207941776	0.917	0.119706610625375
911	911	hsa:1723	3	270	-0.0913476817544946	0.04	23.6731537802727	0.001	0.000445065244154014
912	912	hsa:9249	2	77	0.0751764016548882	0.772	12.9256694108206	0.218	0.468204679945033
913	913	hsa:10901	5	2008	0.0335397638199268	0.943	283.879217762982	0.112	0.343035001792637
914	914	hsa:317749	5	2008	0.0335799737391866	0.943	282.193200468069	0.075	0.258072424542916
915	915	hsa:10170	6	2968	0.0194455182045288	0.902	403.444178352904	0.069	0.235059826973799
916	916	hsa:79132	3	210	-0.109193412790725	0.037	26.4893852361591	0.000999000999000999	0.000414192716672494
917	917	hsa:1729	2	130	-0.120911871051464	0.066	14.0217112381257	0.09	0.0363887141049091
918	918	hsa:1730	2	70	-0.0450860273126477	0.326	8.15359136609499	0.075	0.115187007791848
919	919	hsa:81624	3	732	-0.0691878175778173	0.011	110.292774741772	1	0.0606084600680215
920	920	hsa:23405	12	3625	-0.00366148649449782	0.418	440.172585656173	0.521	0.549732450287003
921	921	hsa:1736	7	44	-0.0799162004655881	0.234	8.33985561360662	0.000999000999000999	0.00218832988276512
922	922	hsa:22943	13	3620	-0.011426596133756	0.246	311.80053117105	0.434	0.345609426469519
923	923	hsa:27123	7	3154	-0.015266024851321	0.169	351.539811922793	0.03	0.0318619813191918
924	924	hsa:27121	7	3154	-0.014827553227226	0.177	385.666340446677	0.553	0.325356720403034
925	925	hsa:1737	1	11	NA	1	2.17479023800361	0.002	0.0144292161968444
926	926	hsa:1738	2	69	0.117703167115717	0.899	11.0529433867718	0.197	0.483672507122436
927	927	hsa:1739	4	1908	-0.0469762356970051	0.004	196.858678894285	0.74	0.0201947953915127
928	928	hsa:1740	4	1593	-0.0467808151612562	0.005	142.084628567341	0.92	0.0293558152872406
929	929	hsa:1741	4	1593	-0.0443394227223043	0.013	161.542407038126	0.037	0.00415566842145995
930	930	hsa:1742	5	2956	-0.0279904881472315	0.028	231.729146219381	0.322	0.0514701305922379
931	931	hsa:9229	6	2974	-0.029228178151948	0.031	154.210148000977	0.016	0.00427003157709472
932	932	hsa:28514	5	2270	-0.00328825022158633	0.42	271.536279628234	0.049	0.100501103589699
933	933	hsa:10683	10	3569	-0.0142496357568053	0.182	425.217817182569	0.293	0.209642170870502
934	934	hsa:1743	14	3633	-0.00665230209381817	0.352	307.66526136682	0.57	0.5229165998413
935	935	hsa:1756	2	105	-0.123783554091587	0.105	10.7660726946421	0.000999000999000999	0.00106600171763704
936	936	hsa:29958	7	3178	-0.0124657125357439	0.24	189.141133733941	0.195	0.190095613159539
937	937	hsa:3301	4	1141	-0.05104580017619	0.026	105.735753090571	0.854	0.106745348671928
938	938	hsa:10294	4	1141	-0.050183734197083	0.032	122.574196026846	0.315	0.0564197963246963
939	939	hsa:3337	4	1176	-0.0442272940811908	0.04	101.271851004067	0.000999000999000999	0.000444660563603733
940	940	hsa:51726	5	419	-0.0682130515702313	0.056	63.2348851429132	0.8	0.183928511852342
941	941	hsa:54788	4	1141	-0.0468561595177299	0.036	127.518844575199	0.602	0.104713343023248
942	942	hsa:3300	4	1141	-0.052557289192891	0.024	153.260975278628	0.395	0.0536432527265402
943	943	hsa:64215	5	419	-0.0574425697433527	0.089	34.4757006741538	0.802	0.259799187595337
944	944	hsa:54431	5	419	-0.0688832148839038	0.052	49.0383785512527	0.161	0.0484141246356633
945	945	hsa:5611	3	303	-0.0753817760792394	0.063	25.0445148805568	0.358	0.10807522353001
946	946	hsa:80331	4	1141	-0.0516894761072566	0.026	101.404530084819	0.59	0.07941965134988
947	947	hsa:85479	4	1141	-0.0515572926571269	0.027	114.368821566077	0.012	0.00292726452166371
948	948	hsa:1759	4	958	0.000897104599129593	0.52	159.027359710789	0.036	0.0931912077645
949	949	hsa:10059	7	1017	-0.0644136082602799	0.007	105.268073260999	0.892	0.037939382421398
950	950	hsa:1785	4	2397	-0.0162438373038764	0.212	387.172775634047	0.058	0.0663797257296829
951	951	hsa:26052	4	958	0.000897104599129593	0.508	82.8119679492737	0.002	0.00801815204070306
952	952	hsa:1786	3	67	-0.0484362253956707	0.293	13.4344479723159	0.079	0.110316058063227
953	953	hsa:1788	5	2966	-0.0174638226879334	0.113	272.814466236075	0.873	0.327138549456443
954	954	hsa:1789	2	18	0.235779781285754	0.84	2.37684958543173	0.238	0.521758811451692
955	955	hsa:1793	2	218	-0.0545708459001611	0.173	29.9094571417976	0.867	0.434550923383013
956	956	hsa:1794	3	1273	-0.0248949709676611	0.156	284.3991945309	0.000999000999000999	0.00152207595600745
957	957	hsa:1796	4	1637	-0.0314082628507189	0.071	94.4596329733475	0.103	0.0432790776786663
958	958	hsa:22845	1	6	NA	1	1.31043708650532	0.001	0.00790775527898214
959	959	hsa:57171	6	49	-0.11182274704488	0.15	6.31384660474517	0.059	0.0506869397066663
960	960	hsa:84444	6	2044	-0.0561966435186184	0.002	139.045548623809	0.805	0.0119647489709771
961	961	hsa:1798	6	47	-0.194110559106142	0.052	9.20591451965153	0.001	0.000564941875647909
962	962	hsa:8813	11	83	-0.178381477154622	0.018	13.5294147692984	0.000999000999000999	0.000214456033373848
963	963	hsa:8818	1	7	NA	1	1.81956280043308	0.000999000999000999	0.00790085392538984
964	964	hsa:54344	11	83	-0.164010990378593	0.031	10.3475630626126	0.224	0.0414548279824777
965	965	hsa:1806	2	95	-0.0649184477611003	0.234	14.588401913418	0.654	0.440297134901136
966	966	hsa:1808	5	2850	-0.0103586957476478	0.25	592.055803382169	0.038	0.0537364030635686
967	967	hsa:1812	2	151	-0.10773960505972	0.059	11.1969494956841	0.036	0.0151960606689796
968	968	hsa:1813	3	1328	-0.00921990994551937	0.333	83.4603188821966	0.008	0.0184559962660738
969	969	hsa:1814	4	2332	-0.00757297836053583	0.319	160.565920874898	0.882	0.638155788776415
970	970	hsa:1815	18	3702	0.00545673468083875	0.608	353.085962101866	0.516	0.677410567638534
971	971	hsa:29102	2	15	NA	1	2.77331887657048	0.000999000999000999	0.00790085392538984
972	972	hsa:1840	5	2270	-0.00210323727108959	0.444	168.093937524304	0.009	0.0260637558271106
973	973	hsa:113878	12	3617	-0.014735825525681	0.181	370.7633225969	0.758	0.409718522692612
974	974	hsa:196403	3	135	0.0418958546366371	0.727	15.4406564206957	0.036	0.12151830089576
975	975	hsa:151636	2	31	0	0.508	4.05752485080261	0.018	0.0520719468311652
976	976	hsa:23220	7	3343	-0.0111566824071695	0.226	345.064992569964	0.243	0.21428531938687
977	977	hsa:1841	2	166	-0.0409653516196285	0.26	29.8407031795569	0.000999000999000999	0.00240411127981346
978	978	hsa:1843	2	267	-0.0863395178017478	0.045	33.0713347071106	0.000999000999000999	0.000494948192391326
979	979	hsa:11221	2	267	-0.086559771673691	0.045	26.9582671986565	0.069	0.0210355725549677
980	980	hsa:80824	2	267	-0.0876610410334072	0.044	31.6599922936226	0.369	0.0831368322101691
981	981	hsa:1844	2	267	-0.0876610410334072	0.044	40.3909610919353	0.147	0.0390724657654448
982	982	hsa:1845	2	267	-0.0863395178017478	0.045	39.1907554088372	0.115	0.0324157649886239
983	983	hsa:1846	2	267	-0.086559771673691	0.046	38.05735258912	0.254	0.0636723657068314
984	984	hsa:1847	2	267	-0.0874407871614639	0.045	27.1934912580539	0.000999000999000999	0.000494948192391326
985	985	hsa:1848	2	267	-0.0872205332895207	0.045	34.2512881110944	0.065	0.0199907978350226
986	986	hsa:1849	2	267	-0.0878812949053504	0.044	29.7206668875008	0.007	0.00279830651869714
987	987	hsa:1850	2	267	-0.0872205332895207	0.045	36.6980322382353	0.33	0.0773648678939414
988	988	hsa:1852	2	267	-0.086559771673691	0.046	17.2327410372404	0.464	0.103454039499809
989	989	hsa:1854	1	13	NA	1	2.28720945165747	0.115	0.363724662321172
990	990	hsa:1855	3	1534	-0.00854995544542777	0.325	151.560759454633	0.002	0.00542004982679849
991	991	hsa:1856	11	3620	-0.0081196571397814	0.299	418.409371924498	0.598	0.486605392987846
992	992	hsa:1857	3	1534	-0.0109279564090476	0.289	151.356045569895	0.228	0.245100992169212
993	993	hsa:1778	4	603	-0.00583227634803474	0.439	66.9710782703118	0.037	0.0831656743713536
994	994	hsa:1780	3	60	-0.0171999928333378	0.455	4.80376774511177	0.003	0.0103693601607212
995	995	hsa:1781	4	603	-0.00795542957999475	0.419	88.5683634697585	0.458	0.508688151649682
996	996	hsa:1783	5	1972	0.0194012504203671	0.822	262.92049813271	0.016	0.0701156983076696
997	997	hsa:79659	1	10	NA	1	1.6677322758055	0.01	0.0560517018598809
998	998	hsa:1870	2	62	-0.0199238283824601	0.439	15.1527102010109	0.000999000999000999	0.00382952315010244
999	999	hsa:1871	12	3629	-0.0420209193812344	0.005	283.835913909935	0.625	0.0211510031118555
1000	1000	hsa:1874	1	6	NA	1	1.32235097648191	0.000999000999000999	0.00790085392538984
1001	1001	hsa:1875	4	2039	-0.0399494628796734	0.016	210.630750630993	0.986	0.0812348122301784
1002	1002	hsa:10682	2	11	0.385337317794226	0.925	2.30718687057627	0.038	0.1528367927245
1003	1003	hsa:1892	2	53	-0.108320135950883	0.179	10.3377070986642	0.000999000999000999	0.00172189134983989
1004	1004	hsa:51295	3	649	-0.0214939609935846	0.264	71.0937112683574	0.008	0.0151221732565477
1005	1005	hsa:1906	3	1061	-0.0156632843169562	0.276	129.459745315407	0.079	0.105218730754565
1006	1006	hsa:1909	3	594	-0.0159606334808434	0.283	123.156971071059	0.000999000999000999	0.00259281805640871
1007	1007	hsa:1910	2	179	-0.0257057517720565	0.342	14.7361681642471	0.171	0.224514518814583
1008	1008	hsa:8411	1	4	NA	1	0.744894921319172	0.007	0.0417329159094878
1009	1009	hsa:1917	6	2367	-0.0215238591671779	0.093	307.426392730588	0.364	0.148466652638744
1010	1010	hsa:1938	11	3616	-0.00222159399205175	0.45	590.947601669492	0.587	0.615796558741464
1011	1011	hsa:29904	20	3707	0.00252828993749047	0.55	317.913530225189	0.514	0.639854420337689
1012	1012	hsa:1942	6	3391	-0.0171813204439715	0.175	277.539145496412	0.508	0.304059614831497
1013	1013	hsa:1945	3	1176	-0.00705021368545998	0.358	133.199129306877	0.191	0.251815943925402
1014	1014	hsa:1947	3	337	-0.0900505778018579	0.03	55.8383764902865	0.199	0.0365424198589184
1015	1015	hsa:1948	3	337	-0.0957664830743589	0.019	39.4954134771824	0.357	0.0406527967111744
1016	1016	hsa:1949	3	337	-0.107298572659229	0.011	21.3531855139677	0.334	0.0242721865495031
1017	1017	hsa:1956	1	101	NA	1	9.86748231058323	0.000999000999000999	0.00790085392538984
1018	1018	hsa:54583	2	207	0.0778705774833236	0.92	29.185018182697	0.002	0.0134283010615447
1019	1019	hsa:112399	2	207	0.0778705774833236	0.921	33.9100860123792	0.000999000999000999	0.0073524046656351
1020	1020	hsa:1958	3	439	-0.0314825794054862	0.2	43.1430417299655	0.000999000999000999	0.00190173680154832
1021	1021	hsa:1960	10	3578	-0.0295835191296978	0.009	300.200759560531	0.421	0.0249151497737772
1022	1022	hsa:10938	8	3252	0.000201441874634747	0.486	589.872955101476	0.189	0.311160469530206
1023	1023	hsa:30845	12	3570	-0.0147627377199515	0.18	445.897894143692	0.29	0.206329519329683
1024	1024	hsa:1962	2	203	0.0326059042606871	0.719	29.7766411171837	0.002	0.0108489939043046
1025	1025	hsa:79813	6	2044	-0.0555754382166572	0.003	180.987284211226	0.031	0.000956310729027424
1026	1026	hsa:10919	6	2044	-0.0562976069085534	0.003	214.922002618765	0.405	0.00937130861066039
1027	1027	hsa:9538	9	3570	-0.0294819136360412	0.018	411.66989557707	0.644	0.0632626453373878
1028	1028	hsa:10209	5	696	-0.0580047531577019	0.044	55.7766049873085	0.04	0.0129226969870805
1029	1029	hsa:1964	5	696	-0.0547751089718147	0.049	68.044131300935	0.491	0.113732814691211
1030	1030	hsa:9086	5	696	-0.0578501425317818	0.044	47.0512050339457	0.377	0.0845834683186877
1031	1031	hsa:10289	4	89	-0.0519362912099319	0.286	13.530832898406	0.000999000999000999	0.00261729092785072
1032	1032	hsa:27102	2	268	-0.114845251767032	0.009	27.588588691832	0.274	0.0172747193178758
1033	1033	hsa:5610	2	268	-0.114521516032664	0.009	31.4991816479984	0.148	0.0101512701775428
1034	1034	hsa:9451	2	276	-0.0949837414489443	0.023	33.9627689588691	0.222	0.0320520927305915
1035	1035	hsa:440275	2	268	-0.114197780298296	0.009	40.9607669709796	0.024	0.0020390901444605
1036	1036	hsa:1967	2	23	-0.0486984753557674	0.409	2.73555936349834	0.001	0.00359993431938588
1037	1037	hsa:8892	4	696	-0.0587167222991224	0.039	68.1102147385129	0.111	0.027889230597851
1038	1038	hsa:8890	4	696	-0.0579061228137182	0.043	69.7731905436736	0.173	0.0438976792085828
1039	1039	hsa:8893	4	696	-0.0544912568964833	0.047	89.07229169858	0.041	0.0139742010441627
1040	1040	hsa:1965	3	696	-0.0546685296783036	0.054	55.8032208225119	0.261	0.0741627140308656
1041	1041	hsa:8894	5	696	-0.0598364009589955	0.036	54.0981457754096	0.743	0.123610414034494
1042	1042	hsa:1968	1	15	NA	1	3.18852452213665	0.003	0.0204274289709421
1043	1043	hsa:8661	2	28	-0.284637521276655	0.032	4.18223315670463	0.042	0.0102306691695683
1044	1044	hsa:8662	2	28	-0.227710017021324	0.065	4.32913159971183	0.003	0.0018607896448831
1045	1045	hsa:8663	4	696	-0.0656170114257724	0.031	100.096041619302	0.127	0.0257374928832598
1046	1046	hsa:8664	2	28	-0.227710017021324	0.063	4.8801520720463	0.191	0.0652200922216297
1047	1047	hsa:8665	2	28	-0.21957751641342	0.074	5.90561330710867	0.02	0.011123255522985
1048	1048	hsa:8666	2	28	-0.21957751641342	0.072	4.77235802791387	0.002	0.00141778040520791
1049	1049	hsa:8667	2	28	-0.227710017021324	0.061	5.32265853513082	0.005	0.00277403562831385
1050	1050	hsa:8668	3	89	-0.134583434207688	0.068	9.77448262119307	0.000999000999000999	0.000719876283728516
1051	1051	hsa:8669	2	28	-0.235842517629229	0.057	4.46387814041723	0.029	0.0122407351996168
1052	1052	hsa:1974	7	3247	-0.0299681870674785	0.025	365.007674490865	0.765	0.0947980139485299
1053	1053	hsa:9775	5	74	-0.110745211837204	0.113	11.4949158673241	0.007	0.00644049015884553
1054	1054	hsa:1975	6	3226	-0.0286756044789793	0.028	576.590411103836	0.753	0.102452233448652
1055	1055	hsa:1977	3	340	0.0322555803668429	0.755	46.6976494314002	0.008	0.0369004816528939
1056	1056	hsa:9470	6	3241	-0.029521101096832	0.034	279.681139790885	0.389	0.0704359979423646
1057	1057	hsa:1978	1	7	NA	1	1.0782836210761	0.028	0.128115421526594
1058	1058	hsa:1981	4	358	0.0313754413752655	0.767	47.4589387116626	0.039	0.134891540110411
1059	1059	hsa:1982	7	3256	-0.0257483395618733	0.05	371.84067839036	0.898	0.184238955042103
1060	1060	hsa:8672	4	358	0.0370314283710503	0.805	45.8713878185875	0.008	0.0389312601982962
1061	1061	hsa:1983	5	696	-0.0557886675195134	0.047	73.4251137647228	0.098	0.0293881015697503
1062	1062	hsa:2001	4	2223	-0.0271077842286277	0.069	270.241477715549	0.478	0.145509767309118
1063	1063	hsa:2002	5	3214	-0.0294617736580861	0.035	556.421305509636	0.49	0.0868777343570988
1064	1064	hsa:2005	2	259	-0.00418992327261842	0.473	26.7223205937725	0.012	0.0350294823577283
1065	1065	hsa:9844	4	2311	-0.0239477209667991	0.131	123.166633580907	0.072	0.0534195195957263
1066	1066	hsa:27436	5	3088	-0.0210621442264128	0.146	237.983148659669	0.688	0.331289065396308
1067	1067	hsa:2023	2	226	-0.0777257868091616	0.107	30.8928004304119	0.000999000999000999	0.00108428960134905
1068	1068	hsa:2026	2	226	-0.0771860244007647	0.11	24.7183424205058	0.02	0.0156624554209593
1069	1069	hsa:2027	9	3577	-0.0203671117809478	0.061	546.328498165796	0.678	0.173103470847168
1070	1070	hsa:58478	2	4	-0.816496580927726	0.167	0.62972481102865	0.245	0.171689917959639
1071	1071	hsa:5167	1	39	NA	1	3.5910764210045	0.048	0.193754604867564
1072	1072	hsa:5168	6	3350	0.0157706822134315	0.807	362.062314216361	0.259	0.536193344715675
1073	1073	hsa:5169	5	3072	-0.000700071754334198	0.499	289.471902641503	0.079	0.166887093012787
1074	1074	hsa:133121	4	2101	0.0167840894811056	0.8	209.787388795249	0.006	0.0304278689331278
1075	1075	hsa:953	5	3171	0.00651318947397017	0.668	623.175151328747	0.108	0.261817152452497
1076	1076	hsa:954	3	779	-0.0140698193908637	0.318	47.6915869205734	0.679	0.546895456919372
1077	1077	hsa:956	3	962	-0.0328925109688923	0.148	162.610037361101	0.997	0.42991141701095
1078	1078	hsa:9583	2	214	0.000605774525858766	0.487	29.0594725404932	0.005	0.0170883637521599
1079	1079	hsa:957	8	3552	-0.00422691675033718	0.396	400.135176586058	0.134	0.208873517397213
1080	1080	hsa:955	3	659	-0.0390202478019494	0.141	67.8426491121174	0.599	0.293198495318422
1081	1081	hsa:377841	3	962	-0.0371145051340977	0.122	55.4140849272625	0.286	0.15197202583253
1082	1082	hsa:2033	11	3634	-0.0218526767118571	0.045	416.530101426981	0.353	0.0816867064788756
1083	1083	hsa:2034	2	163	-0.142819986390323	0.02	13.0160520453872	0.346	0.0413355094047197
1084	1084	hsa:2035	3	138	-0.0481510304562268	0.279	20.8074429811582	0.019	0.0330774967837723
1085	1085	hsa:2036	3	138	-0.0771886747771574	0.161	23.5775605800091	0.000999000999000999	0.00156578623039298
1086	1086	hsa:2037	4	638	0.00522023640272959	0.55	77.8456812654432	0.000999000999000999	0.00467395152751146
1087	1087	hsa:23136	6	2885	-0.0249002380437241	0.067	350.692561309005	0.12	0.0468195426141617
1088	1088	hsa:2041	6	3235	-0.030529712956325	0.048	311.788859509046	0.183	0.0503746886947842
1089	1089	hsa:1969	5	3133	-0.0198623032731686	0.151	367.233399550676	0.391	0.226098876958283
1090	1090	hsa:2042	5	2736	-0.031032656577869	0.034	399.490867503522	0.003	0.00103943484995736
1091	1091	hsa:2043	6	3235	-0.0311640568716869	0.037	257.459106530538	0.69	0.119171513748515
1092	1092	hsa:2044	5	2736	-0.0299968922810584	0.038	187.387479064884	0.048	0.0133274634584899
1093	1093	hsa:2046	5	2736	-0.0308362873827796	0.034	148.440687893174	0.389	0.0704359979423646
1094	1094	hsa:2047	5	2688	-0.0278950047774368	0.068	336.967742847556	0.004	0.00250504070973377
1095	1095	hsa:2048	6	3218	-0.0345751052917359	0.026	311.533210889551	0.193	0.0315869241841482
1096	1096	hsa:2049	6	3218	-0.034830258621888	0.025	312.370547689909	0.73	0.0913155211309038
1097	1097	hsa:2050	6	3218	-0.0342271273629801	0.027	319.973025476209	0.475	0.068695302737642
1098	1098	hsa:2051	6	3218	-0.0347109127093975	0.025	509.363591141122	0.284	0.0422283895140376
1099	1099	hsa:2052	2	145	0.0130223071427968	0.592	17.9928998098814	0.000999000999000999	0.00498735067598472
1100	1100	hsa:2053	10	3573	0.0107255037870727	0.741	494.524092126757	0.441	0.692274129863847
1101	1101	hsa:29924	11	3617	-0.0116496062204547	0.27	370.861055226942	0.717	0.511467249892128
1102	1102	hsa:22905	3	1091	-0.00373537705933372	0.444	101.198406283535	0.021	0.0529152250130076
1103	1103	hsa:2057	3	1140	-0.0128928855396547	0.334	122.222513797531	0.064	0.103577119031278
1104	1104	hsa:2060	12	3626	-0.0112383910845558	0.278	319.514937948596	0.492	0.408879641703019
1105	1105	hsa:85465	4	2164	0.0113319784163605	0.735	266.457194423631	0.069	0.201923474198929
1106	1106	hsa:2064	2	710	-0.0161153923665978	0.305	107.865957429637	0.000999000999000999	0.00277156890700843
1107	1107	hsa:55914	5	1651	-0.039768357864617	0.044	233.126710475869	0.103	0.0289893546531198
1108	1108	hsa:2065	3	1758	-0.0113043123184269	0.278	275.676484413512	0.002	0.00472307669862482
1109	1109	hsa:2066	3	1766	-0.009955150052317	0.307	162.35711947963	0.03	0.0523815565984644
1110	1110	hsa:2069	6	3331	-0.0169518678280766	0.175	284.876510939452	0.226	0.167303998077593
1111	1111	hsa:90952	5	1839	-0.00965875454675513	0.312	240.492711993791	0.000999000999000999	0.00282810603755466
1112	1112	hsa:9700	3	99	0.0172187294771027	0.567	18.1203000760736	0.001	0.00480541076115211
1113	1113	hsa:2099	4	2720	-0.0273335501215402	0.058	315.707191329174	0.018	0.00821074240426065
1114	1114	hsa:2100	4	2703	-0.0264698813005535	0.079	217.455223783621	0.453	0.154963814546969
1115	1115	hsa:2107	7	3043	-0.023610406766663	0.056	311.907272562253	0.954	0.209929351339396
1116	1116	hsa:23474	4	521	-0.0409496025824959	0.131	59.8379289324851	0.183	0.113412117634909
1117	1117	hsa:55500	4	154	-0.0330283451986871	0.282	16.0902636701276	0.94	0.6170329750059
1118	1118	hsa:55224	3	58	-0.0704750712310343	0.252	8.3034691860762	0.144	0.156628739384779
1119	1119	hsa:2113	3	1507	-0.0116293360338181	0.3	197.096898357204	0.041	0.0663973190042263
1120	1120	hsa:2114	2	191	-0.0603731294205118	0.162	19.4964532889355	0.215	0.151763929858065
1121	1121	hsa:51513	4	2501	-0.0114560309791213	0.257	210.45293671349	0.001	0.00238147365957875
1122	1122	hsa:55770	6	3145	-0.0190348784740291	0.125	305.342081873145	0.707	0.302787433927392
1123	1123	hsa:23265	3	340	-0.0201069836825544	0.293	58.9409413384073	0.026	0.0447728250684322
1124	1124	hsa:2146	2	3	NA	1	1.12679632312908	0.009	0.0513947763148133
1125	1125	hsa:7430	2	326	-0.04482838247312	0.162	47.6797842450681	0.273	0.182142234800691
1126	1126	hsa:2159	6	2682	-0.0124809558755962	0.24	358.769401058053	0.000999000999000999	0.0022383707016876
1127	1127	hsa:50848	3	1459	-0.0013706362197186	0.465	130.265731595042	0.139	0.24167021453598
1128	1128	hsa:2161	4	945	-0.00273451218137128	0.476	116.388532315604	0.072	0.149886075911414
1129	1129	hsa:2162	6	2682	-0.0125587672098757	0.238	400.839873737253	0.001	0.00222369109246169
1130	1130	hsa:2149	3	1430	0.00244904293776655	0.517	286.465075120374	0.000999000999000999	0.00442547206195692
1131	1131	hsa:2150	2	108	-0.0723289255248699	0.201	14.8769821214555	0.952	0.507779438983262
1132	1132	hsa:2151	5	2019	-0.0184846204283543	0.212	219.413075987095	0.000999000999000999	0.00200350034178679
1133	1133	hsa:9002	3	763	-0.0116167114234284	0.321	74.3572540536487	0.000999000999000999	0.00290056656162709
1134	1134	hsa:2152	6	1768	-0.0151105479625767	0.252	298.091504298693	0.000999000999000999	0.00233800639823982
1135	1135	hsa:2153	6	2692	-0.0272532803582877	0.045	299.831470730197	0.309	0.0733559219329738
1136	1136	hsa:2157	10	3569	-0.0257684035082907	0.061	376.617574932013	0.484	0.133523818961583
1137	1137	hsa:2170	1	3	NA	1	0.489322889475588	0.082	0.287084954600866
1138	1138	hsa:2167	1	3	NA	1	0.639102090691033	0.114	0.361557478686991
1139	1139	hsa:8772	4	1577	-0.0558211835532035	0.015	147.543110371682	0.888	0.070842268336747
1140	1140	hsa:9415	1	20	NA	1	3.65842311095402	0.003	0.0204274289709421
1141	1141	hsa:2184	7	935	-0.0205322509306756	0.212	129.675440540312	0.091	0.0954580656735513
1142	1142	hsa:81889	6	43	0.0957190439288535	0.758	5.8036104407188	0.000999000999000999	0.00619865795991257
1143	1143	hsa:22909	14	3621	-0.0262326082373393	0.048	590.994892622853	0.469	0.107915927000071
1144	1144	hsa:2175	3	94	0.0356821211617623	0.64	14.1550011671475	0.000999000999000999	0.00534188491952441
1145	1145	hsa:2187	4	123	-0.0510412900981441	0.27	20.6833057691589	0.000999000999000999	0.0024863973894213
1146	1146	hsa:2176	4	123	-0.0174048843629687	0.398	23.5977950296731	0.000999000999000999	0.0035108522528463
1147	1147	hsa:2177	4	322	-0.0177110992889898	0.364	56.788755001219	0.000999000999000999	0.00324340225114932
1148	1148	hsa:2178	4	123	-0.0436099911566519	0.297	21.1474101799097	0.000999000999000999	0.00270675828380611
1149	1149	hsa:2188	11	3570	-0.0374924990036887	0.006	477.397798988067	0.623	0.0246304466824685
1150	1150	hsa:55215	3	117	-0.0115491823788666	0.444	26.002719063211	0.000999000999000999	0.0038681162439202
1151	1151	hsa:55120	12	3596	-0.0378336329464008	0.006	498.750444833368	0.581	0.0232132751569487
1152	1152	hsa:57697	11	3596	-0.0347475003992629	0.007	198.710704241614	0.445	0.0210933038848036
1153	1153	hsa:9855	3	1178	-0.0411598538052852	0.046	214.268234432394	0.292	0.071325469504867
1154	1154	hsa:355	4	2221	-0.0422526198578405	0.018	332.594933426497	0.007	0.00125738281002761
1155	1155	hsa:356	6	3456	-0.0261075789893884	0.019	438.933422978522	0.096	0.0133274634584899
1156	1156	hsa:2194	1	5	NA	1	1.74711478703838	0.000999000999000999	0.00790085392538984
1157	1157	hsa:10826	2	13	0.124034734589208	0.738	2.26650537753723	0.011	0.0471953849168702
1158	1158	hsa:2091	5	44	-0.115011848456927	0.161	5.95962261053324	0.000999000999000999	0.00156578623039298
1159	1159	hsa:2203	10	3598	-0.0300504629650236	0.005	540.792230945354	0.252	0.00967257088310363
1160	1160	hsa:8789	11	3629	-0.0314502003163882	0.004	245.984119095796	0.368	0.0110711081567703
1161	1161	hsa:26232	7	3437	-0.0361274252416092	0.007	248.176022394604	0.181	0.00971928797947385
1162	1162	hsa:26260	5	3015	-0.032616639727758	0.005	395.665185225199	0.336	0.0124134552957525
1163	1163	hsa:114907	4	2044	-0.0533495624559673	0.004	219.889263273116	0.082	0.00295937899946229
1164	1164	hsa:286151	6	3432	-0.0262213289114235	0.027	239.130050617581	0.252	0.0407576242886677
1165	1165	hsa:26271	2	60	-0.137332776689775	0.112	12.8031086848522	0.001	0.00113086530890695
1166	1166	hsa:26270	7	3437	-0.0362432341066504	0.006	387.209047076383	0.394	0.0166600540241921
1167	1167	hsa:23291	4	2349	-0.0403238697879466	0.012	314.891554615698	0.946	0.0621903579217401
1168	1168	hsa:2207	4	2529	-0.0160379719414977	0.217	535.806458059176	0.000999000999000999	0.00204569925767457
1169	1169	hsa:2208	4	1280	-0.0229576847597158	0.214	156.845813895028	0.01	0.0152944718228895
1170	1170	hsa:2212	3	1707	-0.00720803029014812	0.348	267.45235354967	0.000999000999000999	0.00311646257475122
1171	1171	hsa:2213	4	1956	-0.0334078660511652	0.088	373.267466612698	0.000999000999000999	0.000908938307148938
1172	1172	hsa:2214	2	362	-0.0191684159343613	0.347	46.956687856022	0.004	0.0105208892866538
1173	1173	hsa:2222	7	467	-0.0283185139833811	0.229	63.6309364002297	0.013	0.0202937302893157
1174	1174	hsa:2224	10	3595	-0.0127175548568885	0.241	468.833833653951	0.559	0.40477187790148
1175	1175	hsa:2235	10	167	-0.0622039110485741	0.144	13.2282675996822	0.2	0.130964540884999
1176	1176	hsa:2241	11	3597	-0.0228665213202423	0.093	283.702816181748	0.426	0.167523592545183
1177	1177	hsa:83706	4	1750	0.0128970984302528	0.689	275.886467838984	0.000999000999000999	0.00570009410033813
1178	1178	hsa:2242	4	1183	-0.031822834290498	0.098	116.67704096691	0.46	0.18479719186866
1179	1179	hsa:2243	21	3707	0.00787121637295203	0.622	324.736871809279	0.446	0.633123956781234
1180	1180	hsa:2244	12	3625	0.00210984961596772	0.519	164.248846352517	0.52	0.6233628497266
1181	1181	hsa:2245	3	1026	-0.025625281427188	0.143	150.185990058895	0.674	0.321861502894052
1182	1182	hsa:89846	3	1026	-0.0306971786523617	0.102	122.822040257491	0.132	0.0714633551086686
1183	1183	hsa:2246	4	2428	-0.0333289068771211	0.034	151.091664212506	0.121	0.0267136809326091
1184	1184	hsa:2256	1	17	NA	1	2.87356150755151	0.000999000999000999	0.00790085392538984
1185	1185	hsa:2257	6	3372	-0.0160263641086933	0.19	265.566428242772	0.565	0.346918782012466
1186	1186	hsa:2258	1	17	NA	1	1.63540479172095	0.039	0.165523551681247
1187	1187	hsa:8817	3	1143	-0.0190926666609217	0.2	77.5830803846284	0.102	0.0998012957138921
1188	1188	hsa:9965	3	1143	-0.0178304409411693	0.211	57.8957684675387	0.003	0.00529507040597412
1189	1189	hsa:2247	4	2369	-0.0155616331514448	0.207	214.589725581963	0.003	0.00520657545461513
1190	1190	hsa:26281	11	3617	-0.0152803684880479	0.217	276.095929703774	0.336	0.263832221065712
1191	1191	hsa:8074	3	1143	-0.0200543624473997	0.186	98.5667682545942	0.155	0.131070946662177
1192	1192	hsa:2248	4	2369	-0.0166087301228179	0.192	107.077534029929	0.386	0.266964602334348
1193	1193	hsa:2249	3	1143	-0.0209739840432193	0.178	73.9903552950056	0.096	0.0866255452113
1194	1194	hsa:2250	6	3372	-0.0163719006786345	0.188	332.343047990673	0.419	0.278947223271814
1195	1195	hsa:2251	1	17	NA	1	1.43325519888834	0.049	0.196780814062704
1196	1196	hsa:2252	3	1143	-0.020637390517952	0.187	115.778747594796	0.001	0.00179228316298751
1197	1197	hsa:2254	1	17	NA	1	2.88697130290501	0.002	0.0144292161968444
1198	1198	hsa:2260	4	2796	-0.0103435206851628	0.259	351.54157163807	0.001	0.00239799876653257
1199	1199	hsa:2261	5	3220	-0.0209225847281469	0.125	575.246597443415	0.41	0.203515782624386
1200	1200	hsa:2264	3	1542	0.0193571208402876	0.822	153.122310084692	0.002	0.0121830641829804
1201	1201	hsa:2266	19	3702	0.00731026324244217	0.613	198.018492266018	0.498	0.667495504705371
1202	1202	hsa:2268	2	365	-0.0246548190765509	0.279	53.6200156582973	0.005	0.0105669309048738
1203	1203	hsa:2271	2	28	-0.325300024316178	0.025	3.77636780234316	0.001	0.000289915868327402
1204	1204	hsa:2274	3	750	-0.0281712259225377	0.156	62.0227643574636	0.009	0.0106260756826234
1205	1205	hsa:2277	4	2658	-0.029892696714214	0.029	130.182857299283	0.4	0.0632983020980899
1206	1206	hsa:81608	11	165	-0.00236271020057216	0.478	15.8809357304984	0.000999000999000999	0.00412908878894628
1207	1207	hsa:80308	3	173	0.063531013784147	0.804	19.6160808314046	0.339	0.626854591958983
1208	1208	hsa:2316	2	281	0.043226288765539	0.793	49.0511659439752	0.000999000999000999	0.00644911554592744
1209	1209	hsa:2317	4	2578	-0.0166049273141437	0.15	302.705735239693	0.075	0.0617331054412317
1210	1210	hsa:2318	2	281	0.0421304110221873	0.786	53.7400884839657	0.000999000999000999	0.00639914971725512
1211	1211	hsa:10211	5	2165	-0.0182092271084969	0.168	237.75974510176	0.057	0.0540899910955166
1212	1212	hsa:2319	5	2165	-0.0201988761213288	0.152	262.917671717519	0.434	0.245307648463065
1213	1213	hsa:2323	3	278	-0.0482846644310071	0.135	41.6276465751614	0.000999000999000999	0.00133668008269826
1214	1214	hsa:2324	20	3707	-0.0112064303595075	0.292	430.117691412234	0.459	0.403384948898428
1215	1215	hsa:2326	5	2625	0.0298040690575506	0.95	407.623003767952	0.000999000999000999	0.0075544911788388
1216	1216	hsa:2327	3	271	0.0371960071735226	0.771	39.5042593139114	0.032	0.116009872739665
1217	1217	hsa:2328	5	2625	0.0301134498629716	0.954	388.622646012217	0.011	0.0583146502343527
1218	1218	hsa:2329	20	3707	0.0153180857472455	0.83	366.091977848372	0.47	0.757321478579362
1219	1219	hsa:2330	2	100	0.047154743561038	0.683	15.5009990228423	0.001	0.00566139772200275
1220	1220	hsa:2335	3	964	0.0158777899794777	0.655	113.128560382295	0.000999000999000999	0.00545192608276092
1221	1221	hsa:2339	1	7	NA	1	1.28452372535584	0.066	0.245394635439077
1222	1222	hsa:2353	4	2947	-0.0345599025008487	0.031	334.61442968723	0.791	0.115450394683031
1223	1223	hsa:2354	2	369	0.044914113613487	0.832	40.4298233210787	0.000999000999000999	0.00672638139634382
1224	1224	hsa:8061	3	1179	-0.0518307944563129	0.019	112.393271259424	0.004	0.000796843068543525
1225	1225	hsa:2355	3	1082	-0.0424524318409764	0.052	130.963996150582	0.021	0.00853916088661209
1226	1226	hsa:3170	5	2533	-0.00818082416467361	0.321	157.449594366938	0.034	0.0602202750461203
1227	1227	hsa:3171	4	117	-0.146163243592522	0.033	10.9434802354299	0.014	0.00401013489809974
1228	1228	hsa:2308	8	3574	-0.0346873317789738	0.002	416.901985885834	0.586	0.00908187908493361
1229	1229	hsa:2309	3	2030	-0.0576008673310798	0.004	148.432695639911	0.3	0.00927052046662582
1230	1230	hsa:4303	3	1996	-0.0509404484717366	0.005	231.103135914229	0.023	0.00115811651940412
1231	1231	hsa:27086	4	727	-0.0475871405051617	0.166	73.8340717563356	0.248	0.172497790757091
1232	1232	hsa:50943	7	3453	-0.0244181386646613	0.059	199.616704636245	0.412	0.114659614880547
1233	1233	hsa:2356	4	268	-0.09461538856671	0.027	18.7925838831617	0.321	0.049819931674049
1234	1234	hsa:8790	4	7	0.205737799949456	0.771	0.833330071035169	0.2	0.442477642912918
1235	1235	hsa:2357	5	2807	0.0231247173182765	0.897	540.057418363533	0.005	0.0287354702738691
1236	1236	hsa:10023	7	3447	-0.0104597625891958	0.251	431.743475513272	0.173	0.179630791074686
1237	1237	hsa:23401	10	3587	-0.0131157289058582	0.2	405.383450308872	0.432	0.297973520914072
1238	1238	hsa:122786	3	187	-0.17206467153981	0.006	23.8835568808365	0.349	0.0150112141747218
1239	1239	hsa:10818	2	178	-0.104665788788915	0.043	12.0497946834693	0.74	0.141524549348227
1240	1240	hsa:2488	4	431	-0.0379315320463938	0.15	25.9111876414939	0.025	0.0246974978962493
1241	1241	hsa:10468	8	3453	-0.0253745954938017	0.045	234.894884605894	0.549	0.116132019527239
1242	1242	hsa:10841	5	1379	0.00496563847180189	0.581	65.6099822120659	0.108	0.236473905760608
1243	1243	hsa:2495	2	6	-0.346410161513775	0.347	0.702571077799993	0.068	0.112002615806764
1244	1244	hsa:2512	2	6	-0.577350269189626	0.182	0.774820447068888	0.706	0.392143274282092
1245	1245	hsa:197258	17	3629	-0.0099316089639786	0.224	487.653709378238	0.407	0.309520038802536
1246	1246	hsa:2523	3	90	0.146383082333199	0.953	8.59172763580403	0.006	0.035246530706299
1247	1247	hsa:2524	2	43	0.0685687733031655	0.705	4.96306214268536	0.009	0.0384512594882412
1248	1248	hsa:2525	2	36	-0.108623688057233	0.218	4.8790195045212	0.000999000999000999	0.00205412514387693
1249	1249	hsa:2526	6	2562	-0.0104047133138859	0.306	290.544775558375	0.079	0.114161173588094
1250	1250	hsa:2528	3	74	0.133667162063804	0.928	6.51326563412634	0.017	0.0812348122301785
1251	1251	hsa:2530	13	3662	-0.0109390350070612	0.208	470.989275983946	0.554	0.364226203431934
1252	1252	hsa:8087	4	833	-0.0480849464957471	0.053	105.207407396735	0.593	0.14017410200913
1253	1253	hsa:9513	4	833	-0.053270133033868	0.039	78.4277067451336	0.041	0.0118939645753634
1254	1254	hsa:486	2	424	-0.0469859473087594	0.103	27.8533128518344	0.191	0.0969585406714282
1255	1255	hsa:53828	5	2378	0.000136057120493838	0.475	273.857332881588	0.003	0.0107638564379977
1256	1256	hsa:2533	3	344	-0.0662394116843525	0.066	56.1415419453603	0.000999000999000999	0.000700671779094787
1257	1257	hsa:2534	4	2580	-0.0108502779944207	0.296	377.832242307949	0.000999000999000999	0.00269864193683926
1258	1258	hsa:8321	11	3620	-0.00668552926994631	0.344	273.413665318981	0.437	0.435189894735695
1259	1259	hsa:11211	1	27	NA	1	2.31427036882314	0.027	0.124521797150401
1260	1260	hsa:2535	5	3144	-0.00645478425821213	0.331	537.109032956406	0.311	0.336987582495068
1261	1261	hsa:7976	5	3144	-0.00757544231983929	0.313	478.601190872506	0.185	0.222873539059533
1262	1262	hsa:8322	2	336	-0.00355350079852631	0.475	31.4750759550916	0.208	0.327488178213758
1263	1263	hsa:7855	5	3144	-0.00657166779613603	0.326	347.206848388993	0.127	0.173243608983934
1264	1264	hsa:8323	11	3620	-0.00581870233711026	0.358	490.884683496791	0.522	0.500324980510358
1265	1265	hsa:8324	2	336	-0.00392269568668488	0.469	37.6309847001718	0.037	0.0877018863333905
1266	1266	hsa:8325	2	336	-0.00253821485609022	0.485	34.3643978465314	0.005	0.0170281651048873
1267	1267	hsa:8326	4	2637	0.00532952068492651	0.605	341.23623676837	0.016	0.0545728718960745
1268	1268	hsa:51343	2	59	-0.09413827472432	0.187	7.14282462323404	0.000999000999000999	0.00179067939015964
1269	1269	hsa:92579	4	2312	-0.0365287526623264	0.031	248.407983944977	0.269	0.0482562250501627
1270	1270	hsa:2539	12	3626	-0.0189028710352487	0.071	449.529708143713	0.493	0.15234430970533
1271	1271	hsa:2548	3	366	0.045730830238245	0.847	30.787754184842	0.213	0.489368030342218
1272	1272	hsa:2549	2	319	-0.051990646123116	0.127	31.135998545638	0.33	0.174858193542363
1273	1273	hsa:9846	2	379	-0.0631572723945804	0.067	53.3590489326544	0.081	0.03373623339023
1274	1274	hsa:11337	4	2046	-0.0534541293155352	0.004	182.372220834189	0.398	0.0118488805929634
1275	1275	hsa:23710	4	2046	-0.0543136563843478	0.003	180.467023321833	0.224	0.00558112949012043
1276	1276	hsa:11345	4	2046	-0.0546123772672794	0.002	206.162030036118	0.819	0.012144589482837
1277	1277	hsa:2550	11	3620	-4.84390092747832e-05	0.489	412.360710412682	0.55	0.622143152091203
1278	1278	hsa:9568	1	19	NA	1	2.37941376603196	0.184	0.49547879193266
1279	1279	hsa:2556	5	2046	-0.0546752246452348	0.003	106.451567241447	0.179	0.00458034819287556
1280	1280	hsa:2562	6	3015	-0.0321060303344189	0.009	175.119403230849	0.117	0.00827248598425931
1281	1281	hsa:2564	5	2046	-0.0543202410284365	0.003	160.550512082225	0.62	0.0135541525517381
1282	1282	hsa:2566	10	3575	-0.0320947596692387	0.004	232.297691332846	0.568	0.016101879335896
1283	1283	hsa:2568	6	3015	-0.0326499409159105	0.007	359.444900571668	0.092	0.0053759908197178
1284	1284	hsa:55879	5	2046	-0.0552795419928794	0.002	127.728760544733	0.232	0.00402549046666245
1285	1285	hsa:2571	3	336	0.0888971450584066	0.974	27.6333560199757	0.000999000999000999	0.00772106512191189
1286	1286	hsa:1647	3	990	-0.0178155241968998	0.264	129.743337050813	0.001	0.00243924422407194
1287	1287	hsa:4616	2	270	-0.0562093727709146	0.173	33.0899354751751	0.000999000999000999	0.00167006672750982
1288	1288	hsa:9514	2	40	-0.257132681931364	0.025	2.52587721193648	0.549	0.0725851606020253
1289	1289	hsa:2581	4	760	-0.0270883027548679	0.189	64.0421752395623	0.87	0.461270600568425
1290	1290	hsa:2582	10	3589	-0.0150152683223398	0.16	422.62226385065	0.359	0.22154690450767
1291	1291	hsa:2584	10	3586	-0.0139363348005402	0.163	629.107112076871	0.457	0.26794986029392
1292	1292	hsa:2585	3	207	-0.0133743182429284	0.417	25.8055392273928	0.058	0.114205840341422
1293	1293	hsa:130589	2	91	-0.0629347575479492	0.252	11.2741998360541	0.193	0.195681658369367
1294	1294	hsa:2588	10	3584	-0.00262005222730208	0.434	324.730693682496	0.405	0.481360023229236
1295	1295	hsa:2589	2	22	-0.0466252404120157	0.435	3.63535431390133	0.007	0.0206885045804628
1296	1296	hsa:55568	4	72	-0.129047438682695	0.059	8.3306998777661	0.613	0.156227268978151
1297	1297	hsa:63917	4	72	-0.110258922705904	0.096	8.45877705490497	0.841	0.283913852561881
1298	1298	hsa:79695	4	72	-0.114214399753649	0.092	8.23174279481032	0.021	0.0140054535174466
1299	1299	hsa:114805	4	72	-0.112236661229777	0.09	8.78514947886947	0.44	0.167465475964579
1300	1300	hsa:79623	4	72	-0.103336837872349	0.108	8.34047020424069	0.162	0.0882810192911518
1301	1301	hsa:117248	3	33	-0.0245827162551507	0.45	4.01727509198438	0.031	0.0735482470014709
1302	1302	hsa:57452	4	72	-0.126080830896886	0.064	10.4424184185304	0.71	0.185911512207626
1303	1303	hsa:374378	4	72	-0.128058569420758	0.062	8.13925316908611	0.112	0.0414548279824777
1304	1304	hsa:2591	4	72	-0.116192138277522	0.081	8.06267057276217	0.973	0.279051401708314
1305	1305	hsa:11227	4	72	-0.123114223111076	0.066	7.61011449078507	0.252	0.0847637693471884
1306	1306	hsa:11226	4	72	-0.13300291573044	0.059	10.1064285744165	0.199	0.0639258503850712
1307	1307	hsa:442117	4	72	-0.105314576396222	0.103	11.3597838175619	0.132	0.0720313312826279
1308	1308	hsa:2592	10	3608	-0.0197184508961965	0.064	438.955137273265	0.638	0.171424544257521
1309	1309	hsa:2593	2	21	-0.218217890235992	0.171	1.05863546583826	0.782	0.40276962911425
1310	1310	hsa:23193	2	13	-0.286445949615773	0.14	1.4441841197895	0.092	0.0689347847109804
1311	1311	hsa:2597	2	131	-0.141383604613285	0.025	21.6084166296553	0.000999000999000999	0.000289651204631098
1312	1312	hsa:54433	10	110	0.0460113841748458	0.731	16.1428977863748	0.003	0.0156196091873352
1313	1313	hsa:2618	3	291	-0.0553704713992761	0.113	28.3660377374027	0.000999000999000999	0.00113893188119192
1314	1314	hsa:2619	8	3240	-0.0161665763551956	0.142	553.451013568915	0.082	0.063494315763082
1315	1315	hsa:2520	3	81	-0.00800956914174748	0.455	7.74086715634439	0.445	0.525855690040113
1316	1316	hsa:2625	4	1935	-0.0366603939643636	0.042	327.805935472164	0.026	0.00853916088661209
1317	1317	hsa:2628	3	312	0.0391560816782331	0.799	28.6013372058568	0.000999000999000999	0.00649189424666568
1318	1318	hsa:2629	3	271	-0.0710882813468598	0.081	31.2764069795305	0.465	0.161169438873539
1319	1319	hsa:57704	3	271	-0.0787534525529559	0.056	37.5927027923359	0.269	0.0782642209536174
1320	1320	hsa:57733	13	3630	-0.00409745177200289	0.389	273.227430498574	0.597	0.571296454706671
1321	1321	hsa:2632	2	38	0.0360887974640511	0.636	5.82783546023754	0.115	0.264428883418322
1322	1322	hsa:26301	7	3067	0.00592397619369816	0.64	457.383115106063	0.136	0.299538367640917
1323	1323	hsa:23464	4	489	0.00777290335673247	0.575	52.1682814180028	0.008	0.0293558152872406
1324	1324	hsa:2639	2	59	0.123081418791244	0.862	5.7552586561009	0.096	0.288962295994351
1325	1325	hsa:2641	4	431	-0.0364611243488209	0.157	24.4912598057287	0.614	0.321898932539146
1326	1326	hsa:2643	2	5	-0.316227766016838	0.389	1.17152135050738	0.002	0.00634753397828542
1327	1327	hsa:2729	4	225	0.00608017451534716	0.54	38.6227756492827	0.025	0.0716183855127597
1328	1328	hsa:2730	2	47	-0.0855615045652022	0.261	5.41884057571027	0.851	0.556294329059592
1329	1329	hsa:2650	2	33	-0.0823219552131212	0.302	4.44964906175493	0.014	0.0273383588199987
1330	1330	hsa:2651	6	2562	-0.0105109656534353	0.305	207.076345439298	0.04	0.0659570957923637
1331	1331	hsa:9245	3	72	-0.162258088945672	0.032	10.3577063542605	0.001	0.000363192788965266
1332	1332	hsa:2653	3	104	-0.0933113795004575	0.133	14.7848749496757	0.000999000999000999	0.0013188605431569
1333	1333	hsa:9615	2	75	0.096874123807491	0.845	10.7484057748865	0.032	0.124666244271911
1334	1334	hsa:2673	12	3635	-0.00366363179080865	0.406	392.521320052455	0.658	0.61977066166406
1335	1335	hsa:9945	7	3480	0.00222481721954626	0.572	617.116379525127	0.116	0.246350469825724
1336	1336	hsa:79017	2	47	-0.0696049196885166	0.294	5.37897506741846	0.84	0.592340696844742
1337	1337	hsa:8836	4	268	-0.0806168106017542	0.045	48.5593462938139	0.004	0.00173205966727333
1338	1338	hsa:9453	2	18	-0.0723101526062187	0.359	2.51774601439728	0.302	0.3492969005885
1339	1339	hsa:2678	3	225	0.037848538075355	0.743	23.8415523847736	0.001	0.00609617718334216
1340	1340	hsa:2687	6	2851	0.00983734316025524	0.735	387.672936132379	0.015	0.0607211781805827
1341	1341	hsa:124975	6	2851	0.00980224868963801	0.731	512.572820830583	0.019	0.0732875046154584
1342	1342	hsa:2686	6	2851	0.00947490198957047	0.729	344.701850206703	0.244	0.485008904011427
1343	1343	hsa:2690	3	1140	-0.0111162426523951	0.358	165.675299862347	0.000999000999000999	0.00319588390783117
1344	1344	hsa:28964	2	52	-0.169875533626605	0.078	7.48806269970519	0.177	0.072932293494064
1345	1345	hsa:2697	2	497	-0.0196859995819108	0.318	49.7871053914401	0.004	0.00975263364348968
1346	1346	hsa:2710	1	8	NA	1	1.45451509098233	0.011	0.0606084600680215
1347	1347	hsa:2712	3	484	-0.0160418010872417	0.355	40.8796252200353	0.343	0.378160972555885
1348	1348	hsa:2717	2	83	-0.0240875863402923	0.407	11.7378801667424	0.043	0.0883012474917488
1349	1349	hsa:2720	2	151	-0.0539731269038976	0.203	14.9257623031588	0.003	0.00511784860476492
1350	1350	hsa:2731	7	3125	0.000773112896670694	0.534	193.879821545911	0.031	0.0844440648753464
1351	1351	hsa:2734	7	3238	-0.0306896818103332	0.05	353.804284493592	0.406	0.0994118281765682
1352	1352	hsa:2735	5	3181	-0.0118716410305014	0.228	279.530770872137	0.258	0.225484471160645
1353	1353	hsa:2736	4	2641	-0.0118828804456201	0.223	314.695237412938	0.002	0.00388697545625112
1354	1354	hsa:2737	11	3621	-0.0122568355513699	0.232	351.489747445491	0.563	0.396484026592401
1355	1355	hsa:2739	4	600	-0.0373558554923068	0.156	68.4828165532752	0.761	0.371702311930743
1356	1356	hsa:2744	12	3640	-0.000121098670898624	0.541	393.2028801753	0.508	0.629798546782286
1357	1357	hsa:27165	4	1913	0.0251370651883516	0.898	194.773229476288	0.041	0.158382509796459
1358	1358	hsa:2746	1	9	NA	1	1.36654034863479	0.02	0.0982404601085629
1359	1359	hsa:2747	1	9	NA	1	1.23549543554634	0.039	0.165523551681247
1360	1360	hsa:2752	12	3632	0.00333773889045869	0.625	285.25040794057	0.473	0.655892403021937
1361	1361	hsa:132158	4	816	0.0388071041571979	0.904	54.8619655925228	0.249	0.560765525666069
1362	1362	hsa:2762	3	12	-0.27524094128159	0.16	1.02712693846089	0.196	0.139935284538558
1363	1363	hsa:29926	2	10	0.227710017021324	0.803	1.40680682994222	0.152	0.378773372844988
1364	1364	hsa:2766	1	47	NA	1	5.25492829315908	0.005	0.0314915868327402
1365	1365	hsa:51292	2	188	0.00231631059302742	0.531	37.1302434090808	0.011	0.0358804059145799
1366	1366	hsa:2767	3	1237	0.0166145583158701	0.743	93.1583008780952	0.001	0.00609617718334216
1367	1367	hsa:2768	1	19	NA	1	3.63130767012688	0.002	0.0144292161968444
1368	1368	hsa:10672	1	22	NA	1	2.99687797150169	0.127	0.38907316045049
1369	1369	hsa:9630	4	2311	-0.0054480016601865	0.393	226.391322648687	0.156	0.232470429510738
1370	1370	hsa:2769	4	2311	-0.00591213161906649	0.382	254.739795855054	0.105	0.169108958223919
1371	1371	hsa:2770	12	3659	0.00109999004382515	0.523	500.7345912927	0.502	0.613656372862314
1372	1372	hsa:2771	3	2276	0.000827554636930616	0.509	270.948803481359	0.201	0.335548723710884
1373	1373	hsa:2773	16	3699	0.00504323479598002	0.591	381.846046913167	0.467	0.631305955981592
1374	1374	hsa:2774	2	160	-0.0961330447197445	0.081	12.2778715017761	0.029	0.0165692953316943
1375	1375	hsa:2776	2	391	-0.00940960061021605	0.373	43.5469658153437	0.9	0.702129096786207
1376	1376	hsa:2778	2	431	-0.0337366872078907	0.181	29.4482761953246	0.921	0.465354758410362
1377	1377	hsa:2779	5	2482	-0.0148705253264188	0.165	234.365642053272	0.071	0.0638102602002671
1378	1378	hsa:346562	2	182	0.0719075504066935	0.876	10.2838387874101	0.094	0.287944590441703
1379	1379	hsa:2781	3	1107	-0.0117856683816325	0.327	63.4866718477428	0.097	0.14117617520023
1380	1380	hsa:2782	4	2969	-0.0153535003137979	0.169	206.609484495323	0.5	0.293299816420306
1381	1381	hsa:2783	2	712	-0.00180893570975886	0.452	65.4683745809915	0.033	0.0776425653013836
1382	1382	hsa:10399	10	3617	-0.0181493767465573	0.181	388.013868314749	0.654	0.370973009588008
1383	1383	hsa:2784	4	2969	-0.0133349445793091	0.192	248.172516433582	0.323	0.234442983294061
1384	1384	hsa:59345	3	2156	-0.014847591482114	0.208	431.883531793702	0.022	0.0292265917939636
1385	1385	hsa:10681	4	2969	-0.014125731203361	0.182	235.165572842465	0.324	0.225892276619251
1386	1386	hsa:10020	2	11	0.0492365963917331	0.608	1.91948654235677	0.089	0.211940432860664
1387	1387	hsa:2790	9	3596	-0.0121063115926996	0.252	417.074821581489	0.711	0.487241956631272
1388	1388	hsa:2791	3	2156	-0.014583023759311	0.206	351.922269811459	0.002	0.00362332872994928
1389	1389	hsa:55970	3	2161	-0.0221067065751333	0.112	301.280958903194	0.991	0.354985397532432
1390	1390	hsa:51764	4	2969	-0.0140984822744633	0.18	139.846716592791	0.268	0.194482778889409
1391	1391	hsa:54331	3	2156	-0.0146033751226036	0.21	413.356432311668	0.001	0.00198836463572183
1392	1392	hsa:2785	3	2156	-0.0160356023143161	0.188	136.688010654106	0.02	0.0247533445691421
1393	1393	hsa:2786	3	2156	-0.0159580127417633	0.194	313.887260244662	0.159	0.138151466874813
1394	1394	hsa:2787	1	55	NA	1	5.23519390104135	0.056	0.217414600941831
1395	1395	hsa:2788	4	2969	-0.0134007961574786	0.195	311.976877311986	0.036	0.0418321242678298
1396	1396	hsa:2792	4	2969	-0.0154695466798898	0.164	371.628979624482	0.415	0.250962103410432
1397	1397	hsa:2793	3	2156	-0.0146402619685713	0.206	364.338760366837	0.002	0.00362332872994928
1398	1398	hsa:29889	9	316	-0.00292501477136189	0.468	45.149566889555	0.000999000999000999	0.00405259095383987
1399	1399	hsa:26354	12	3201	-0.0230709252348726	0.051	458.217435643714	0.808	0.17262537509175
1400	1400	hsa:8443	3	19	0	0.499	2.06568164825719	0.024	0.064968011167213
1401	1401	hsa:10007	12	3629	-0.010778763232678	0.213	446.036793246803	0.524	0.356346613325908
1402	1402	hsa:132789	1	8	NA	1	1.07255143839878	0.065	0.242668920590623
1403	1403	hsa:64841	1	10	NA	1	1.67988061917665	0.008	0.0466265098984184
1404	1404	hsa:2796	2	4	NA	1	0.646777008904763	0.116	0.36588315019359
1405	1405	hsa:2797	3	123	-0.00105837114130424	0.493	19.2609948680133	0.189	0.314309722327449
1406	1406	hsa:2799	1	5	NA	1	0.836577872416653	0.053	0.208685558367791
1407	1407	hsa:2805	3	792	-0.0432238415084175	0.066	60.0246560674512	0.076	0.031576334337868
1408	1408	hsa:2806	3	792	-0.0409771785599574	0.075	127.699386967116	0.1	0.0441963919382991
1409	1409	hsa:2811	2	220	-0.0146219499137725	0.381	15.5679495941849	0.226	0.297253082462073
1410	1410	hsa:51206	4	1924	0.00532425287888449	0.558	125.879189925516	0.32	0.486188631898358
1411	1411	hsa:8733	17	83	-0.137195976492952	0.04	8.73017574644199	0.203	0.0472050120134455
1412	1412	hsa:57678	3	270	-0.0265083952429543	0.298	26.1721559751115	0.129	0.163709280612551
1413	1413	hsa:150763	3	270	-0.0249463754192794	0.307	26.6211860693467	0.27	0.289306064170781
1414	1414	hsa:2817	11	3615	-0.0174238508489402	0.187	506.309703665957	0.501	0.315518688864406
1415	1415	hsa:2719	7	3363	-0.0181212962730449	0.145	283.614483293959	0.28	0.170681880822403
1416	1416	hsa:23171	6	2721	0.0168309535255585	0.834	354.115523509097	0.003	0.0174906434970774
1417	1417	hsa:2820	2	19	-0.236939551103637	0.143	2.98295190855619	0.483	0.253666212709483
1418	1418	hsa:10243	6	2046	-0.0547732059155657	0.002	138.614188370747	0.544	0.00851187457403665
1419	1419	hsa:2821	3	511	0.0444742554241028	0.89	57.9877787270636	0.000999000999000999	0.00713537147857977
1420	1420	hsa:2822	13	83	-0.14353185403403	0.045	5.90145157143258	0.632	0.129685224689899
1421	1421	hsa:139760	3	431	-0.0312240998046432	0.193	37.2196517966035	0.999	0.510179968290342
1422	1422	hsa:26086	2	109	-0.0438595788134431	0.31	7.44918925496756	0.02	0.0377158771189728
1423	1423	hsa:2876	2	111	-0.0509283613986978	0.3	9.03884953746465	0.004	0.00927052046662582
1424	1424	hsa:2877	2	111	-0.0488282227843185	0.311	19.2177902662318	0.025	0.0455369451576284
1425	1425	hsa:2878	5	2525	0.0239576156786064	0.92	291.147983312863	0.074	0.251015847784335
1426	1426	hsa:2879	4	402	0.0458972906912977	0.86	30.8338001372015	0.017	0.0763948337365366
1427	1427	hsa:2882	5	2525	0.0253265744440325	0.929	285.088900206441	0.000999000999000999	0.00740824258321698
1428	1428	hsa:493869	5	2525	0.0240957674806219	0.921	493.010596907195	0.006	0.0342517563560095
1429	1429	hsa:9402	3	393	-0.0762575675582769	0.032	63.4454920106225	0.000999000999000999	0.00036286191106486
1430	1430	hsa:2885	2	547	0.035775816526638	0.862	77.0467594877896	0.076	0.244066393792798
1431	1431	hsa:9380	4	700	-0.0235700377074069	0.227	61.1636462029755	0.019	0.0278021222939578
1432	1432	hsa:2892	2	240	-0.047526278998465	0.159	16.4441658853411	0.279	0.182563018693784
1433	1433	hsa:2902	4	2785	-0.00852235206896259	0.303	390.638597036109	0.735	0.557187254833275
1434	1434	hsa:2905	13	3662	-0.000203833197101452	0.505	186.029186904975	0.443	0.558701894363993
1435	1435	hsa:116444	5	3123	-0.00428975828796373	0.385	291.584581108665	0.293	0.358956183006656
1436	1436	hsa:2868	2	104	-0.154181771101624	0.05	5.76735049159533	0.574	0.130609629083415
1437	1437	hsa:2869	2	104	-0.158109969091474	0.045	18.4553092048838	0.000999000999000999	0.000494948192391326
1438	1438	hsa:2870	2	104	-0.152217672106698	0.053	9.12647188925041	0.207	0.0604776358669313
1439	1439	hsa:2912	3	1050	-0.00669147113379619	0.378	91.9352885538719	0.049	0.0924024807017433
1440	1440	hsa:2913	3	1050	-0.01219925242804	0.301	94.7896032228568	0.001	0.00274162848825784
1441	1441	hsa:2914	4	2332	-0.00740839202988013	0.33	156.989509202583	0.558	0.495715733418286
1442	1442	hsa:2915	2	226	0.00937995349287283	0.557	17.6290024169936	0.016	0.0509798179817447
1443	1443	hsa:2918	4	2332	-0.00693470454165155	0.337	223.695490186663	0.027	0.0518605763398674
1444	1444	hsa:2931	2	136	-0.148728269132723	0.008	8.53398976381575	0.333	0.0184559962660738
1445	1445	hsa:2932	11	3626	-0.0168433311532115	0.167	446.659201071091	0.647	0.348476442065136
1446	1446	hsa:2934	5	2697	-0.0242707020697228	0.093	262.883229138709	0.015	0.0105669309048738
1447	1447	hsa:23708	7	3048	-0.0246868996821326	0.044	269.904116027039	0.817	0.155499610395579
1448	1448	hsa:2936	4	402	0.049441359746417	0.878	45.4283320247458	0.001	0.007057244560681
1449	1449	hsa:2937	14	3641	0.00372289862208297	0.613	388.100827371937	0.604	0.738123806913373
1450	1450	hsa:2938	2	167	0.0569021779200959	0.819	16.4509260275816	0.000999000999000999	0.00663416670636352
1451	1451	hsa:2939	2	167	0.058440074620639	0.82	16.7097137780535	0.000999000999000999	0.00664126742137066
1452	1452	hsa:2941	1	52	NA	1	6.3993946163535	0.004	0.026085843671449
1453	1453	hsa:221357	2	167	0.0654704595374077	0.842	16.3218803218355	0.000999000999000999	0.00679717751957477
1454	1454	hsa:373156	12	3625	0.00577174975756289	0.66	491.179495826236	0.416	0.629452264634118
1455	1455	hsa:2944	2	167	0.0452581029016979	0.772	16.248739984916	0.000999000999000999	0.00629903066172472
1456	1456	hsa:2946	2	167	0.0529475864044136	0.801	17.0908215351778	0.003	0.0168955826853134
1457	1457	hsa:2947	2	167	0.0514096897038704	0.795	15.2358113553865	0.001	0.00646904891243141
1458	1458	hsa:2948	2	167	0.0485535958314332	0.781	22.6199922235749	0.001	0.00636900455374531
1459	1459	hsa:2949	6	3260	0.00783352789928848	0.711	333.998270494356	0.252	0.487241956631272
1460	1460	hsa:9446	2	167	0.0511899901752214	0.802	22.8278882567498	0.463	0.739189346436376
1461	1461	hsa:119391	6	3260	0.00893767378287909	0.74	540.88156878607	0.196	0.425075358146155
1462	1462	hsa:2950	3	388	0.0644487436868155	0.93	46.0412712846296	0.149	0.412436930299816
1463	1463	hsa:2952	3	388	0.0642372629856283	0.93	38.3562171796746	0.233	0.548071312329868
1464	1464	hsa:2954	5	231	0.0543859690263051	0.852	35.7260325063307	0.022	0.0932866682938454
1465	1465	hsa:23560	5	42	-0.0855134678489002	0.229	5.33888464516073	0.007	0.0119197130837836
1466	1466	hsa:2978	6	3257	-0.00963537737370366	0.264	267.490321342847	0.145	0.163181044830572
1467	1467	hsa:9626	3	369	0.0453231765666288	0.868	26.2967972836831	0.153	0.400919461953533
1468	1468	hsa:2977	5	3083	-0.00444353090604293	0.374	327.977939647483	0.094	0.152856880996403
1469	1469	hsa:2982	5	3083	-0.0047455808906237	0.363	530.006044333183	0.028	0.0568056122622602
1470	1470	hsa:2983	5	3083	-0.00479240635671714	0.366	478.069386442514	0.051	0.0929763090132589
1471	1471	hsa:2984	5	2954	-0.0110112569281472	0.258	170.398714542283	0.069	0.0895163684272649
1472	1472	hsa:2987	12	3640	-0.0113841629601843	0.195	341.525693725736	0.432	0.292656955035817
1473	1473	hsa:2990	2	69	0.113462051827082	0.799	8.73866346343901	0.041	0.144748181812828
1474	1474	hsa:2997	11	3626	-0.0135964799820868	0.195	535.186155282925	0.366	0.25977806902236
1475	1475	hsa:3001	4	1678	-0.0285098428539394	0.084	323.918342116007	0.000999000999000999	0.000871526707087053
1476	1476	hsa:3002	4	1687	-0.0361815958221951	0.032	343.162529407449	0.129	0.0267905641713143
1477	1477	hsa:474382	5	2629	-0.0280021302166464	0.058	117.07747513442	0.779	0.185113206852901
1478	1478	hsa:55766	3	250	-0.0388803133745051	0.307	26.5647902200823	0.000999000999000999	0.00278773859079722
1479	1479	hsa:94239	5	2629	-0.0279046467346042	0.059	399.64733491857	0.75	0.182217070908123
1480	1480	hsa:3014	2	59	0.0736687029578969	0.677	10.1067191343517	0.038	0.119889671902127
1481	1481	hsa:9555	5	2629	-0.0271194477503417	0.064	215.410052660122	0.989	0.237988728218182
1482	1482	hsa:55506	5	2629	-0.0277264347439956	0.058	322.942352015126	0.401	0.110733806141548
1483	1483	hsa:3015	5	2629	-0.0271491497487765	0.065	432.444040936229	0.907	0.225855475301549
1484	1484	hsa:286436	5	2629	-0.0270767987269482	0.065	191.226417517416	0.131	0.0490968595908466
1485	1485	hsa:158983	2	59	0.0757735230424082	0.682	4.96546587870868	0.012	0.0475128196647237
1486	1486	hsa:9563	4	511	0.0483078013122033	0.909	49.955418060233	0.015	0.0721988966067043
1487	1487	hsa:3033	2	122	-0.00496352797941783	0.493	24.2205106269953	0.000999000999000999	0.00424344499094661
1488	1488	hsa:3030	2	59	-0.0398185577476015	0.382	8.59151453096985	0.000999000999000999	0.0033853707989829
1489	1489	hsa:3032	2	59	-0.172642829124807	0.052	13.1048640506135	0.000999000999000999	0.000564429420244984
1490	1490	hsa:3029	3	144	0.080675492669639	0.876	16.0128438358661	0.031	0.125084806621611
1491	1491	hsa:84264	1	2	NA	1	0.445401469114631	0.025	0.117221986352848
1492	1492	hsa:3034	6	3061	-0.0083789271956423	0.33	281.091357970183	0.233	0.274142025905737
1493	1493	hsa:9001	6	2046	-0.0555282418143594	0.002	112.815346865981	0.902	0.0132012189386444
1494	1494	hsa:1839	3	974	0.00672337633078452	0.582	141.91102082374	0.000999000999000999	0.00491301004330606
1495	1495	hsa:3052	11	167	-0.0672666696041231	0.13	19.8059392009585	0.043	0.0345840777942466
1496	1496	hsa:3054	2	57	-0.108666310655718	0.186	9.70204285513272	0.000999000999000999	0.00178209988964301
1497	1497	hsa:29915	6	3242	-0.0432451914394495	0.001	386.140612749532	0.486	0.004193840739955
1498	1498	hsa:3055	2	350	-0.00561138601964626	0.443	86.3327242499846	0.000999000999000999	0.00386040214555019
1499	1499	hsa:3059	4	2064	-0.00894390877832674	0.326	299.153210306841	0.000999000999000999	0.00294071301965973
1500	1500	hsa:10870	2	268	-0.0720896873219624	0.069	61.7337789180827	0.001	0.000730116879682324
1501	1501	hsa:3065	4	2629	-0.0303210661674833	0.051	264.297371962598	0.453	0.110150317052784
1502	1502	hsa:79885	6	2629	-0.0280849523594668	0.06	253.132095939845	0.328	0.096986038983206
1503	1503	hsa:3066	4	2450	-0.0289507931441362	0.066	247.19877492962	0.676	0.18335671280315
1504	1504	hsa:8841	1	42	NA	1	6.05419221867633	0.038	0.162266426531719
1505	1505	hsa:9759	4	852	-0.0197943966274431	0.325	113.964399767018	0.03	0.0548972579412307
1506	1506	hsa:10014	6	2629	-0.0278344114341342	0.058	162.059198204076	0.372	0.10434528360329
1507	1507	hsa:10013	6	2629	-0.0278976178073944	0.061	323.524831211144	0.999	0.231439126026863
1508	1508	hsa:51564	6	2629	-0.028862466902824	0.054	277.195447899435	0.994	0.210666990721408
1509	1509	hsa:55869	6	2629	-0.0275526480834563	0.063	324.05053751319	0.171	0.05958236333933
1510	1510	hsa:9734	6	2629	-0.0287170160920687	0.057	162.760405439421	0.251	0.0750689198637275
1511	1511	hsa:3067	7	3174	-0.0105144271275116	0.266	483.795422080396	0.212	0.2185431343386
1512	1512	hsa:374659	6	3342	-0.00421155328387638	0.418	442.594648042087	0.463	0.511375289077286
1513	1513	hsa:55127	9	44	-0.160182790272347	0.083	7.57253063664439	0.000999000999000999	0.000862144419971593
1514	1514	hsa:51409	13	3641	-0.00735727485427803	0.342	526.755003837362	0.525	0.487891494794569
1515	1515	hsa:9709	4	31	-0.117428735763681	0.202	4.95079528769278	0.000999000999000999	0.00191874621069033
1516	1516	hsa:3280	6	3192	-0.0118127327936637	0.255	438.132750345762	0.063	0.082431318881246
1517	1517	hsa:388585	10	3576	-0.0162735164577415	0.172	533.103683608717	0.376	0.241771546918875
1518	1518	hsa:3073	4	691	0.0642090237066293	0.972	53.9541707205234	0.012	0.0635833578817415
1519	1519	hsa:3074	1	12	NA	1	1.87790828211439	0.009	0.0513947763148133
1520	1520	hsa:3081	5	935	-0.0201429350702007	0.218	50.3688758124137	0.328	0.260131686913107
1521	1521	hsa:3082	4	2369	-0.0206212338688988	0.141	152.468321961807	0.031	0.0281176090972143
1522	1522	hsa:9146	2	5	0	0.619	1.28761148671282	0.005	0.0209778090189571
1523	1523	hsa:138050	6	305	-0.0593183734046078	0.108	17.7835858874907	0.451	0.195899289274061
1524	1524	hsa:3087	5	2533	-0.00838814442491519	0.318	372.556421859507	0.04	0.0682374540520124
1525	1525	hsa:64399	4	1349	-0.00166659262780157	0.46	133.546082113418	0.013	0.0365936215718972
1526	1526	hsa:11112	3	312	0.10170964948574	0.978	34.5206286837324	0.019	0.0926417113886344
1527	1527	hsa:26275	2	37	0.122535770348968	0.814	7.39896602578024	0.076	0.234020181712047
1528	1528	hsa:3091	2	664	-0.0228366923650373	0.241	108.141076905263	0.008	0.0139804525756264
1529	1529	hsa:3092	5	1759	0.00324222955719716	0.548	170.985058918141	0.018	0.0554244696934166
1530	1530	hsa:8335	3	250	-0.0338702327249045	0.321	27.8470109938373	0.000999000999000999	0.00290056656162709
1531	1531	hsa:8334	4	1281	-0.0123529613426065	0.367	126.667550361027	0.001	0.00327002457653686
1532	1532	hsa:3013	3	250	-0.0342877394457045	0.319	26.7537399989413	0.000999000999000999	0.00288448626054794
1533	1533	hsa:3012	4	1281	-0.0143823612256522	0.34	107.526543214694	0.000999000999000999	0.00305271919064299
1534	1534	hsa:8969	3	250	-0.0222844212227029	0.374	27.4466687844703	0.000999000999000999	0.00332238071285732
1535	1535	hsa:8329	3	250	-0.0373146631715049	0.313	27.4473139332196	0.000999000999000999	0.00283616987972828
1536	1536	hsa:3018	3	250	-0.038045299932905	0.312	24.4188925620885	0.000999000999000999	0.00282810603755466
1537	1537	hsa:8347	3	250	-0.0253113449485033	0.358	44.3364100104147	0.000999000999000999	0.00319588390783117
1538	1538	hsa:3017	4	1281	-0.0125614321901311	0.362	123.97469154946	0.000999000999000999	0.00322757386256016
1539	1539	hsa:8344	3	250	-0.0253113449485033	0.36	39.9095580225202	0.000999000999000999	0.00321173443522977
1540	1540	hsa:8343	3	250	-0.0347052461665046	0.314	34.9005810020992	0.000999000999000999	0.00284423053019998
1541	1541	hsa:8339	3	250	-0.0386715600141051	0.303	29.2201654163753	0.000999000999000999	0.00275538612147329
1542	1542	hsa:8345	3	250	-0.0316783224407042	0.335	29.6183066444068	0.000999000999000999	0.00301278435701121
1543	1543	hsa:8346	3	250	-0.0260419817099034	0.35	25.2696795801191	0.000999000999000999	0.00313236954678808
1544	1544	hsa:8970	5	2629	-0.0289663027812209	0.055	264.388765796755	0.918	0.2012521292968
1545	1545	hsa:85236	3	250	-0.0265638651109035	0.354	35.0559680964759	0.000999000999000999	0.00316414930408383
1546	1546	hsa:8342	4	1281	-0.0143355616476365	0.345	115.783678481263	0.005	0.0127003611941605
1547	1547	hsa:8341	3	250	-0.0333483493239044	0.325	23.1214272235123	0.000999000999000999	0.00293268989479468
1548	1548	hsa:8337	4	1281	-0.0125912137397775	0.361	110.892905280615	0.000999000999000999	0.00321965553255462
1549	1549	hsa:317772	3	250	-0.0360621430091048	0.309	34.9734298616561	0.000999000999000999	0.00280389525819429
1550	1550	hsa:8349	3	250	-0.0344964928061046	0.314	28.5642456982722	0.000999000999000999	0.00284423053019998
1551	1551	hsa:92815	3	250	-0.0358533896487047	0.312	32.1153913506219	0.000999000999000999	0.00282810603755466
1552	1552	hsa:128312	3	250	-0.0245807081871032	0.363	29.6082889992547	0.000999000999000999	0.00323548943289091
1553	1553	hsa:3098	2	297	0.0579781255376033	0.875	35.396723561655	0.06	0.207214460742689
1554	1554	hsa:3099	1	35	NA	1	4.94068108073636	0.033	0.145571174678017
1555	1555	hsa:3101	8	3558	-0.0107078775910188	0.21	683.040141416577	0.197	0.17314169497931
1556	1556	hsa:80201	9	3579	-0.0103688476639631	0.214	238.486505545877	0.309	0.24573699591047
1557	1557	hsa:3105	4	715	-0.08343186281136	0.039	65.101898014381	0.000999000999000999	0.000434530457616924
1558	1558	hsa:3106	4	715	-0.0900658275812063	0.024	138.158626904156	0.000999000999000999	0.000279043905565221
1559	1559	hsa:3107	4	715	-0.0874590696598784	0.033	88.7103714688266	0.000999000999000999	0.000373186895499919
1560	1560	hsa:3108	2	68	-0.110039474571923	0.245	15.4226328181648	0.000999000999000999	0.00227995674595344
1561	1561	hsa:3109	2	68	-0.140717146270762	0.195	17.4079680432072	0.005	0.00773474625979227
1562	1562	hsa:3111	2	65	-0.0950146187582615	0.261	14.3533480318493	0.000999000999000999	0.00241235694196243
1563	1563	hsa:3112	1	20	NA	1	7.58235862118115	0.000999000999000999	0.00790085392538984
1564	1564	hsa:3113	2	65	-0.0993999088547966	0.257	16.580808506106	0.001	0.00238147365957875
1565	1565	hsa:3115	2	65	-0.114017542509914	0.231	15.5124476446788	0.000999000999000999	0.0021632520802559
1566	1566	hsa:3117	2	65	-0.146176336551172	0.198	5.96004203647072	0.003	0.00500660695572937
1567	1567	hsa:3119	1	20	NA	1	7.23042081736293	0.000999000999000999	0.00790085392538984
1568	1568	hsa:3122	2	65	-0.100861672220308	0.253	16.6266882627355	0.001	0.0023483766305169
1569	1569	hsa:3123	2	65	-0.131558702896054	0.216	8.37503190054344	0.000999000999000999	0.00203726876776469
1570	1570	hsa:3125	2	65	-0.103785198951332	0.252	15.7182453496792	0.001	0.00234009253055412
1571	1571	hsa:3126	2	65	-0.124249886068496	0.224	7.51721334943889	0.000999000999000999	0.00210458495249059
1572	1572	hsa:3127	2	65	-0.140329283089125	0.202	5.88623401923004	0.000999000999000999	0.00191874621069033
1573	1573	hsa:3133	4	715	-0.0926881948314043	0.021	130.469058910977	0.000999000999000999	0.000246964775256796
1574	1574	hsa:3134	3	102	-0.269669912552112	0.02	27.418583034405	0.000999000999000999	0.000236179376318549
1575	1575	hsa:3135	3	102	-0.253865082512428	0.027	22.5970892298526	0.000999000999000999	0.000310747428763149
1576	1576	hsa:3145	5	161	-0.0672987116651489	0.135	20.7830720496346	0.036	0.0307478438475989
1577	1577	hsa:8091	6	3242	-0.0266294076441939	0.043	271.773003844763	0.082	0.0234394065535928
1578	1578	hsa:3155	2	36	0.00939060283031685	0.536	6.91923392091414	0.000999000999000999	0.00456878469621722
1579	1579	hsa:3157	3	224	0.0243198517123026	0.676	33.5858592269127	0.052	0.152843488928924
1580	1580	hsa:3158	4	1784	0.00966223390144959	0.671	268.586395503242	0.002	0.0102174434706606
1581	1581	hsa:3162	2	133	-0.106723128371109	0.075	22.1037093438922	0.887	0.246819555667426
1582	1582	hsa:3163	2	19	-0.0263066820882328	0.471	1.33262774296723	0.306	0.42330777061496
1583	1583	hsa:6928	7	3207	-0.0098080488276377	0.269	411.322312214699	0.092	0.116291114361304
1584	1584	hsa:3174	4	117	-0.139773593599406	0.04	8.54197588136265	0.971	0.165004152045112
1585	1585	hsa:3176	3	266	0.115823634132508	0.991	45.0653946460924	0.066	0.243777402664844
1586	1586	hsa:3190	5	2384	-0.024614846389901	0.079	267.692813729958	0.947	0.268785424127836
1587	1587	hsa:112817	4	916	-0.0300433260281078	0.122	122.068297627291	0.094	0.0627092571746609
1588	1588	hsa:9456	2	229	0.0116619916269858	0.574	30.0759939955712	0.004	0.016247843294005
1589	1589	hsa:9455	9	3569	-0.0129032020166204	0.264	409.834738090851	0.492	0.395000154715642
1590	1590	hsa:9454	5	3074	-0.0167183365208108	0.189	272.927065454544	0.332	0.236473905760608
1591	1591	hsa:3236	5	2797	-0.0106985788959298	0.25	248.422750381289	0.059	0.0769435548938956
1592	1592	hsa:27306	4	2111	0.0338352957099714	0.964	236.853367474777	0.029	0.127958062703215
1593	1593	hsa:3251	3	581	-0.0316871298538597	0.219	82.3067455479235	0.04	0.0502610201165364
1594	1594	hsa:10855	2	38	-0.168903903236511	0.135	8.22510258667366	0.075	0.056626570118144
1595	1595	hsa:3265	2	942	-0.0163937511044778	0.257	104.313010099421	0.016	0.02670269372741
1596	1596	hsa:3269	2	80	-0.0102044216440367	0.446	7.73070989324918	0.001	0.00388697545625112
1597	1597	hsa:3290	5	2905	0.0087771625431905	0.705	459.731700108691	0.012	0.0488345556513795
1598	1598	hsa:3291	1	3	NA	1	0.572126934411104	0.131	0.397265092207309
1599	1599	hsa:3292	10	3597	0.00835078038166902	0.717	288.552741478782	0.462	0.697246549435521
1600	1600	hsa:3028	2	39	0.015664248032424	0.559	3.97493367227419	0.307	0.474083201340675
1601	1601	hsa:51144	19	3707	0.0149413611211167	0.822	485.056161197175	0.469	0.75298118757813
1602	1602	hsa:3294	1	24	NA	1	5.0766409554747	0.071	0.258800353537798
1603	1603	hsa:3293	5	2815	0.0147364830199097	0.796	164.283850133072	0.273	0.549015531584576
1604	1604	hsa:3295	1	2	NA	1	0.734500773879325	0.007	0.0417329159094878
1605	1605	hsa:8630	4	1753	0.0305456218078344	0.914	254.370575915687	0.164	0.434370661192786
1606	1606	hsa:51478	19	3707	0.0125435278511363	0.789	534.219724254609	0.485	0.75025121814632
1607	1607	hsa:7923	7	3463	0.0200062721143163	0.911	558.632068243134	0.315	0.645210677453416
1608	1608	hsa:3283	1	36	NA	1	5.08973147904343	0.000999000999000999	0.00790085392538984
1609	1609	hsa:80270	1	3	NA	1	0.522088051443773	0.152	0.438348963236651
1610	1610	hsa:3297	5	2325	-0.0178512930342132	0.141	196.395746066725	0.265	0.16018453374638
1611	1611	hsa:3320	10	3617	-0.0304613279085154	0.032	432.761350632722	0.79	0.118253310421304
1612	1612	hsa:3326	6	3397	-0.0308842361654827	0.028	250.684164681113	0.796	0.107065018539023
1613	1613	hsa:7184	6	3394	-0.032063408893453	0.025	447.371326329603	0.451	0.0618452623627656
1614	1614	hsa:3303	3	998	-0.029868954775009	0.139	86.6447058158586	0.145	0.0988462245950342
1615	1615	hsa:3304	2	152	0.0337063561038547	0.692	11.9501493795983	0.000999000999000999	0.00572190956948486
1616	1616	hsa:3305	12	3656	-0.0121313877655025	0.239	265.429581333287	0.396	0.317779798228996
1617	1617	hsa:3306	4	2313	-0.0231530644651718	0.076	152.490721297539	0.422	0.142392364493604
1618	1618	hsa:3309	11	3615	-0.0155875200167042	0.184	274.418934513795	0.59	0.349612297720732
1619	1619	hsa:3313	6	3265	-0.0263753754709855	0.078	304.121427712441	0.763	0.227435351761218
1620	1620	hsa:3315	4	2249	-0.0488204800987873	0.008	202.268763101555	0.152	0.0093780212104528
1621	1621	hsa:3329	6	3255	-0.026531275689908	0.077	323.066155261227	0.973	0.269065364681084
1622	1622	hsa:3339	2	125	-0.0433716309788668	0.265	13.6722517704335	0.000999000999000999	0.00244530146010235
1623	1623	hsa:3355	4	2332	-0.00626030201603797	0.35	197.134639118272	0.23	0.283319596611888
1624	1624	hsa:3356	11	3624	-0.000188831189965418	0.508	441.951375298114	0.522	0.617160419091296
1625	1625	hsa:3357	4	2016	0.0012645512461216	0.511	227.682326825171	0.087	0.182861992772705
1626	1626	hsa:3358	2	141	-0.00141475392472324	0.472	10.203489345971	0.366	0.476086932579816
1627	1627	hsa:3362	2	95	-0.11853697496601	0.091	7.84883155382038	0.006	0.00464803880389178
1628	1628	hsa:3363	4	2269	-0.0149716711757871	0.208	298.166908437617	0.934	0.512585902689507
1629	1629	hsa:27429	4	1086	-0.0537733709053943	0.021	119.022487536798	0.717	0.078234851194558
1630	1630	hsa:3373	8	2969	0.0211319861745472	0.898	317.09916117145	0.008	0.0426434980423044
1631	1631	hsa:8692	4	25	0.0710403334167472	0.652	4.08488478183115	0.001	0.00543472382941653
1632	1632	hsa:23553	6	587	-0.0160717583023631	0.34	35.3854189665135	0.016	0.0338040306265417
1633	1633	hsa:81888	5	843	-0.0205131113226513	0.231	68.354838545434	0.15	0.151159154223447
1634	1634	hsa:10525	3	53	0.193621699513458	0.962	5.87179384364828	0.002	0.0139554433350451
1635	1635	hsa:3383	3	1399	-0.00211348659133421	0.446	90.0437343291866	0.014	0.0379393824213979
1636	1636	hsa:3384	3	493	-0.0585906027342287	0.065	49.84035158392	0.988	0.2405321947104
1637	1637	hsa:3385	3	483	-0.0572880536424503	0.056	77.287784432778	0.000999000999000999	0.000603701167416069
1638	1638	hsa:23463	3	9	-0.0680413817439772	0.459	1.04801324545773	0.304	0.414342753761676
1639	1639	hsa:29851	4	2391	-0.0173373234008278	0.208	453.933340060574	0.000999000999000999	0.00196965651503294
1640	1640	hsa:23308	3	254	-0.0734357232538822	0.096	35.8608894732865	0.009	0.00695860224983444
1641	1641	hsa:3397	3	1043	-0.0447618838869195	0.037	160.864330152981	0.003	0.00112176381958836
1642	1642	hsa:3398	2	85	-0.052069260989245	0.282	14.4362859807646	0.002	0.00478297735684695
1643	1643	hsa:3399	2	38	-0.0110420305069272	0.448	10.1488121515056	0.000999000999000999	0.0038989501878075
1644	1644	hsa:3400	2	38	-0.0331260915207817	0.391	7.63116582115629	0.000999000999000999	0.00345603474209789
1645	1645	hsa:3417	3	41	0.0523890870233356	0.645	8.88757965686993	0.000999000999000999	0.00537860392933919
1646	1646	hsa:3418	14	3636	-0.026127162364903	0.045	418.964734062712	0.611	0.12630518674257
1647	1647	hsa:3419	14	3636	-0.0269592195327744	0.039	347.232121805886	0.543	0.102810938037681
1648	1648	hsa:3420	3	41	0.0710620226386141	0.697	5.26871290121966	0.000999000999000999	0.00575823983949368
1649	1649	hsa:3421	2	14	-0.151306883167201	0.292	2.39135807328541	0.000999000999000999	0.00266614268407642
1650	1650	hsa:3422	2	16	0.0438529009653515	0.592	2.67029557863463	0.062	0.158005931524043
1651	1651	hsa:3620	3	760	0.0667760606344402	0.983	132.344343507418	0.007	0.0411414390579699
1652	1652	hsa:169355	2	202	-0.0560648682495048	0.195	15.4944076330984	1	0.513777365481586
1653	1653	hsa:3423	3	58	-0.0994439690027442	0.217	4.21149569900505	0.994	0.546551984966398
1654	1654	hsa:3425	4	59	-0.0462048638569526	0.361	8.8588141060688	0.155	0.217284874695158
1655	1655	hsa:64135	5	2427	-0.042648560896852	0.014	349.532331758045	0.001	0.000170470345196886
1656	1656	hsa:3434	3	29	-0.33300126701243	0.009	2.20036452370388	0.471	0.0273984708113467
1657	1657	hsa:3446	4	2044	-0.028422795259885	0.118	225.119975954275	0.415	0.19669032682773
1658	1658	hsa:3444	2	180	-0.0821302875429363	0.095	31.6076772803776	0.001	0.000974855198304556
1659	1659	hsa:3445	2	180	-0.0870177302686479	0.084	18.257396451185	0.533	0.18384154778061
1660	1660	hsa:3454	10	3617	-0.0192917357345251	0.199	314.909303896665	0.544	0.348936854189969
1661	1661	hsa:3455	3	1265	-0.0278396217415822	0.153	120.540226820696	0.079	0.0654586567654749
1662	1662	hsa:338376	2	113	-0.108276017354824	0.084	12.2008383031724	0.677	0.219909834745716
1663	1663	hsa:3458	2	403	-0.0385234357156295	0.178	77.6404845073436	0.000999000999000999	0.00171326805037457
1664	1664	hsa:3460	3	1479	-0.0351699834559082	0.113	102.788880157512	0.009	0.00802504343066828
1665	1665	hsa:282617	4	1861	-0.0302393936582013	0.118	142.427977317535	0.01	0.0091358441917954
1666	1666	hsa:163702	3	1140	-0.0115400290291726	0.353	136.439378595258	0.003	0.00831360559489228
1667	1667	hsa:3479	4	2723	-0.0230286982791967	0.114	221.609116888544	0.002	0.00214004560381424
1668	1668	hsa:3480	8	3563	-0.00704684535903726	0.35	349.985825319383	0.404	0.418001381108481
1669	1669	hsa:10642	11	3595	-0.0178293860456661	0.144	237.496903341457	0.587	0.293368999886615
1670	1670	hsa:3486	10	3596	-0.028581933695703	0.04	343.642874508963	0.363	0.0759719544743813
1671	1671	hsa:150084	3	1433	0.00648072173683106	0.597	132.446660442647	0.25	0.433143279611382
1672	1672	hsa:3549	8	3433	-0.0126039177780051	0.2	279.282328828851	0.318	0.238827019029253
1673	1673	hsa:3551	3	1733	-0.046421877779282	0.008	239.456105961651	0.431	0.022998025273471
1674	1674	hsa:9641	4	1712	-0.0502981259045024	0.012	191.775307506021	0.013	0.0015234421099115
1675	1675	hsa:3586	4	2425	-0.0456334029786723	0.006	289.630186685921	0.000999000999000999	7.80704331013144e-05
1676	1676	hsa:3587	4	2430	-0.0163604878382431	0.265	486.747682257614	0.000999000999000999	0.00244530146010235
1677	1677	hsa:3588	2	219	0.0356908020211063	0.741	19.0134551749015	0.2	0.431142338299006
1678	1678	hsa:3589	4	1861	-0.0314472535033566	0.107	237.006333629939	0.000999000999000999	0.00108428960134905
1679	1679	hsa:3590	3	1140	-0.00924723606763264	0.393	115.235216514476	0.000999000999000999	0.00347170956588036
1680	1680	hsa:3592	2	456	-0.0314628281719615	0.211	38.4540451059297	0.000999000999000999	0.00199504650962766
1681	1681	hsa:3594	4	2575	-0.0162758083192012	0.25	360.293059898239	0.000999000999000999	0.00232144084426451
1682	1682	hsa:3597	3	1140	-0.0129852492371575	0.33	176.140211574049	0.000999000999000999	0.00297277496829786
1683	1683	hsa:3598	3	1140	-0.010105675138541	0.374	178.575856491724	0.000999000999000999	0.00332238071285732
1684	1684	hsa:3600	4	1861	-0.0318577239799832	0.102	127.467175941814	0.909	0.313219266169293
1685	1685	hsa:3601	4	2430	-0.0169588121971619	0.26	424.784092911957	0.001	0.00240625552100667
1686	1686	hsa:112744	3	114	-0.184980423961247	0.008	6.0872410159853	0.671	0.0334281457521509
1687	1687	hsa:23765	4	114	-0.16315686396821	0.022	11.4192311312052	0.342	0.0443137820333962
1688	1688	hsa:3606	2	335	-0.0718872376544354	0.059	47.8484705537272	0.365	0.104187961501852
1689	1689	hsa:8809	4	2414	-0.0394984494897738	0.025	448.736535425337	0.007	0.00168887680220714
1690	1690	hsa:8807	4	2414	-0.0409796708097817	0.019	456.292094518056	0.001	0.000225550359997159
1691	1691	hsa:29949	2	113	-0.108276017354824	0.084	11.8904232174413	0.000999000999000999	0.000871526707087053
1692	1692	hsa:3552	3	1545	-0.041480211620692	0.048	151.412952173869	0.002	0.000984111587183659
1693	1693	hsa:3553	3	1599	-0.0312991992972246	0.104	240.692609590694	0.000999000999000999	0.00105684354900322
1694	1694	hsa:3554	4	2462	-0.0479327009455789	0.011	281.991092633999	0.418	0.029345051454444
1695	1695	hsa:7850	1	8	NA	1	1.03971233803226	0.019	0.0943030096964982
1696	1696	hsa:3556	4	1951	-0.0559531783558559	0.005	256.16405114096	0.008	0.000445065244154014
1697	1697	hsa:53832	3	1140	-0.0099100814261821	0.371	214.714298738599	0.016	0.0363682085732229
1698	1698	hsa:53833	3	1140	-0.0106163920541446	0.364	105.448183254841	0.032	0.0635121269331239
1699	1699	hsa:50615	3	1241	-0.00511164106653184	0.428	271.174443413273	0.000999000999000999	0.00374441716008218
1700	1700	hsa:58985	9	3573	-0.0176914363978767	0.234	300.955478673395	0.476	0.355846438599578
1701	1701	hsa:116379	3	1140	-0.0105403278326717	0.369	75.4176978633799	0.003	0.00864135449915798
1702	1702	hsa:51561	2	419	-0.0743511909387031	0.033	33.9062089169371	0.003	0.00101181868007514
1703	1703	hsa:11009	4	1861	-0.0316222081327384	0.103	299.216484449909	0.000999000999000999	0.00104767577444253
1704	1704	hsa:55801	4	1861	-0.0311646344866629	0.111	121.927647277255	0.001	0.00112176381958836
1705	1705	hsa:3559	6	3404	-0.0148984343906707	0.245	191.896354815821	0.398	0.324493811361595
1706	1706	hsa:3560	3	1449	-0.00931414525866649	0.368	316.379971678797	0.000999000999000999	0.00327502615405321
1707	1707	hsa:3561	3	1455	-0.00307560670887609	0.449	269.496094387932	0.000999000999000999	0.00390665308649275
1708	1708	hsa:90865	5	1674	-0.0363675979104835	0.059	218.793673542127	0.024	0.0107048457057342
1709	1709	hsa:3563	3	1501	-0.00922794614348244	0.368	222.521483529675	0.000999000999000999	0.00327502615405321
1710	1710	hsa:259307	5	3048	0.00384616655940818	0.632	553.78100487123	0.062	0.166120049939415
1711	1711	hsa:3566	11	3621	-0.0187428100240157	0.222	438.407030168721	0.545	0.376526612679065
1712	1712	hsa:3568	3	1140	-0.0130287145065705	0.332	114.020754148821	0.000999000999000999	0.00298878774193252
1713	1713	hsa:3569	3	1705	-0.0425798279365784	0.045	321.416316429397	0.000999000999000999	0.000494948192391326
1714	1714	hsa:3570	3	1241	-0.00574303956883669	0.432	110.487233603735	0.000999000999000999	0.00377539709396903
1715	1715	hsa:3572	3	1140	-0.010105675138541	0.376	132.975551272881	0.000999000999000999	0.00333814411988533
1716	1716	hsa:3574	2	144	-0.0678237767977102	0.153	15.5814420249129	0.966	0.430374297171103
1717	1717	hsa:3575	3	1323	-0.0139405430456073	0.288	294.554422681716	0.000999000999000999	0.00263358868982067
1718	1718	hsa:3611	2	434	-0.0294816870041577	0.214	45.653597330281	0.315	0.249212201956513
1719	1719	hsa:55272	7	44	-0.133093796089813	0.14	7.71746238981066	0.001	0.0013823415389497
1720	1720	hsa:92856	7	44	-0.154160120995605	0.108	5.03593267339246	0.000999000999000999	0.00109341949427243
1721	1721	hsa:3612	2	183	0.0662283822965582	0.86	22.8738177305351	0.034	0.1325220439135
1722	1722	hsa:3613	11	3616	-0.00551510847257626	0.39	548.002285970811	0.413	0.455170326502419
1723	1723	hsa:54928	4	2295	-0.000901706578743676	0.465	373.038339691456	0.216	0.33127068015694
1724	1724	hsa:3614	2	176	-0.0852485780089906	0.076	22.3991762918224	0.919	0.255733184061688
1725	1725	hsa:3615	2	176	-0.0857567662534555	0.079	34.3456484278411	0.057	0.0288327605037951
1726	1726	hsa:10207	4	666	0.00218130790664439	0.508	106.947611518289	0.011	0.0345737038844385
1727	1727	hsa:3625	10	3595	-0.0257265799752989	0.05	341.156280361009	0.535	0.123617656550873
1728	1728	hsa:83729	10	3595	-0.0255873682288319	0.048	267.681579224026	0.473	0.108643502256047
1729	1729	hsa:11185	2	53	-0.118243883006303	0.162	7.77816711371848	0.246	0.168278365234335
1730	1730	hsa:3628	12	3626	-0.00544638133415843	0.394	475.302893724319	0.46	0.490785805770363
1731	1731	hsa:3631	2	218	-0.0833136597695579	0.089	23.2645370207255	0.406	0.156117706848531
1732	1732	hsa:8821	2	218	-0.0846484580569207	0.085	27.3115716791313	0.265	0.107965241435361
1733	1733	hsa:3632	2	185	0.124752234173473	0.978	12.7744182405919	0.065	0.23874435769841
1734	1734	hsa:3633	2	280	0.00579347026260195	0.56	29.6290827429349	0.139	0.276573291631566
1735	1735	hsa:3635	2	199	-0.0142198195032887	0.388	24.3694657413351	0.135	0.206860690442097
1736	1736	hsa:56623	1	32	NA	1	4.10410672886756	0.034	0.148967421648443
1737	1737	hsa:27124	3	984	0.00962585682471112	0.635	91.9756206630246	0.014	0.0508759429598667
1738	1738	hsa:3636	2	199	-0.0136931595216854	0.392	29.22860409834	0.029	0.0622620004329136
1739	1739	hsa:3630	11	3626	-0.0217400197145989	0.138	203.907584504167	0.417	0.221849650282922
1740	1740	hsa:3643	3	1777	0.00523445821180337	0.598	142.385041490873	0.045	0.124196574326288
1741	1741	hsa:253430	6	3289	0.000924428621726715	0.504	170.170558683827	0.274	0.411499314717284
1742	1742	hsa:64768	2	19	-0.23606684260939	0.142	2.00566895604968	0.114	0.0829389760212663
1743	1743	hsa:8826	2	459	-0.0458502393088559	0.146	59.4889335992142	0.19	0.127184567430008
1744	1744	hsa:10788	3	897	-0.0679600846361499	0.013	188.038367390835	0.000999000999000999	0.000159111177932933
1745	1745	hsa:128239	3	897	-0.0696520800226922	0.008	88.1740427866464	0.994	0.0463946065501607
1746	1746	hsa:3654	5	3130	-0.0306664554373438	0.049	405.721878767428	0.739	0.156373304984105
1747	1747	hsa:3656	5	3027	-0.0246468059697672	0.086	256.867655632961	0.03	0.0179567119705254
1748	1748	hsa:11213	4	2065	-0.0139086853842874	0.21	312.281012870635	0.001	0.00198836463572183
1749	1749	hsa:51135	2	239	-0.12888297150259	0.01	16.788541362155	0.93	0.0528029901730532
1750	1750	hsa:3659	2	158	-0.0625262553162956	0.161	27.0375378834748	0.001	0.00156719109706975
1751	1751	hsa:3661	3	954	-0.0509411452845241	0.034	125.94770786093	0.501	0.0864057133421722
1752	1752	hsa:3663	5	2896	-0.0265263234046029	0.102	171.44456966334	0.285	0.131921071767438
1753	1753	hsa:3665	3	1021	-0.052213771636432	0.021	137.804817027895	0.001	0.000247190750525058
1754	1754	hsa:3394	4	1658	-0.0337864956647823	0.08	343.745504070244	0.000999000999000999	0.000833924749140737
1755	1755	hsa:10379	2	146	-0.0011701742551976	0.493	16.825928429622	0.000999000999000999	0.00424344499094661
1756	1756	hsa:3667	3	1874	-0.0291004505498703	0.065	331.505690222162	0.935	0.230980052514852
1757	1757	hsa:8660	2	553	-0.031686495352688	0.177	34.199457261917	0.204	0.156031363945471
1758	1758	hsa:9636	4	1061	-0.0654821510129544	0.007	136.298726886369	0.041	0.00262778013421274
1759	1759	hsa:51477	2	30	-0.270172358779124	0.058	2.23444609935872	0.773	0.184034087556564
1760	1760	hsa:83737	3	1435	-0.0208902165402969	0.172	173.497602326039	0.002	0.00308735490180327
1761	1761	hsa:3672	3	1294	0.0176954993335438	0.709	240.412212986097	0.000999000999000999	0.00584528677624531
1762	1762	hsa:8515	1	60	NA	1	8.88615876175084	0.002	0.0144292161968444
1763	1763	hsa:22801	3	1294	0.0175833250113027	0.712	207.454302530557	0.000999000999000999	0.00586701667191049
1764	1764	hsa:3673	9	3570	-0.0111063613846463	0.281	482.558238701506	0.353	0.328397058089544
1765	1765	hsa:3675	3	1294	0.0176313997208346	0.706	107.747233032272	0.002	0.0106786003735545
1766	1766	hsa:3676	4	2449	0.00315045507712598	0.523	452.04880430986	0.000999000999000999	0.00447080285193163
1767	1767	hsa:3678	2	288	0.0511241872115573	0.781	64.5055423807611	0.000999000999000999	0.00636342174176368
1768	1768	hsa:3655	5	3077	-0.0109449195170451	0.28	364.026456654502	0.361	0.332739490082394
1769	1769	hsa:3679	3	1294	0.0185969001372675	0.73	117.552673912667	0.003	0.0156012396799867
1770	1770	hsa:8516	2	281	0.0434332904630417	0.734	37.3589671962105	0.000999000999000999	0.00602598676901819
1771	1771	hsa:3680	2	290	0.0358346788190182	0.694	44.4915465987275	0.000999000999000999	0.00573644599387277
1772	1772	hsa:3682	1	5	NA	1	0.575873962931606	0.083	0.2895799177084
1773	1773	hsa:3683	2	254	-0.0546850290695609	0.163	59.8694054624307	0.000999000999000999	0.00158322663014083
1774	1774	hsa:3684	2	432	-0.0756076946479703	0.031	104.306712230896	0.000999000999000999	0.000352505702765413
1775	1775	hsa:3685	2	442	0.0485779639246108	0.816	60.8544178501181	0.000999000999000999	0.00661285723668326
1776	1776	hsa:3687	2	190	-0.0799599946789305	0.104	26.7187173634769	0.000999000999000999	0.00105684354900322
1777	1777	hsa:3688	3	1896	-0.00937081705978582	0.312	154.186616040184	0.013	0.0263946552994838
1778	1778	hsa:3689	2	483	-0.0596978003403832	0.052	119.965792511521	0.000999000999000999	0.000564429420244984
1779	1779	hsa:3690	3	1750	0.0110556035419792	0.662	186.121825337505	0.000999000999000999	0.00550316069986269
1780	1780	hsa:3691	1	65	NA	1	11.8645733442329	0.015	0.0779955761681989
1781	1781	hsa:3693	1	65	NA	1	11.119341799284	0.000999000999000999	0.00790085392538984
1782	1782	hsa:3694	2	389	0.0315308866678046	0.704	66.8996457889548	0.259	0.492654393290494
1783	1783	hsa:3695	3	1614	0.0171309327492857	0.733	184.492947236187	0.146	0.346177356725732
1784	1784	hsa:3696	1	65	NA	1	10.2117727123293	0.01	0.0560517018598809
1785	1785	hsa:3702	4	2607	-0.0207878120155456	0.151	475.867259028392	0.000999000999000999	0.00147820555788596
1786	1786	hsa:3704	3	927	-0.0353843680963519	0.129	81.0604212457873	0.584	0.270139615657458
1787	1787	hsa:3705	12	3617	-0.00365658864763465	0.418	383.307981392057	0.672	0.637569534399868
1788	1788	hsa:3706	1	22	NA	1	4.23096247896066	0.172	0.474764857973014
1789	1789	hsa:3707	2	225	0.109912614298197	0.978	26.2678873659632	0.031	0.136310142854665
1790	1790	hsa:80271	4	2409	0.000837581858506629	0.492	222.625150495216	0.161	0.280064123667528
1791	1791	hsa:3708	7	3530	0.000382887110252651	0.515	462.443634609644	0.327	0.468398886027745
1792	1792	hsa:3709	3	1641	0.0108079666734071	0.675	191.05756956924	0.04	0.124521797150401
1793	1793	hsa:3710	20	3707	0.00155046419619968	0.539	423.512183089427	0.49	0.615743306186514
1794	1794	hsa:3712	2	41	0.182202722203374	0.929	8.18603709885832	0.000999000999000999	0.00740824258321698
1795	1795	hsa:182	1	4	NA	1	1.08823194696393	0.002	0.0144292161968444
1796	1796	hsa:3714	1	4	NA	1	1.19730206106644	0.000999000999000999	0.00790085392538984
1797	1797	hsa:3716	2	481	-0.0507645123913506	0.088	59.7067885228874	0.925	0.285582132486255
1798	1798	hsa:3717	2	454	-0.0590031130093636	0.059	52.3900032359432	0.002	0.00118528946015284
1799	1799	hsa:58494	3	1484	0.0212628360109328	0.796	214.814388098003	0.000999000999000999	0.00647051054392864
1800	1800	hsa:83700	3	1467	-0.00133700691312349	0.468	266.765936960481	0.001	0.00405617577863782
1801	1801	hsa:3725	3	1947	-0.0351811792096316	0.05	177.584195643456	0.005	0.00232351241002551
1802	1802	hsa:3726	2	167	-0.0796935833597005	0.112	24.0291160176532	0.019	0.0152206747215658
1803	1803	hsa:3727	2	167	-0.0832468004521712	0.105	17.8599665773444	0.166	0.0880138729710171
1804	1804	hsa:3728	5	3085	-0.032021257332541	0.024	347.944520669344	0.155	0.0245297975917932
1805	1805	hsa:2648	3	866	-0.0140503394701782	0.304	120.980857588381	0.486	0.430271044229758
1806	1806	hsa:8850	3	866	-0.0183509083122708	0.258	79.366376231352	0.701	0.490132972449247
1807	1807	hsa:3770	4	1561	0.0140836086285906	0.74	138.782414859753	0.014	0.0577031595166823
1808	1808	hsa:3759	2	77	-0.118773155755479	0.138	11.2539258187323	0.062	0.0492921640052915
1809	1809	hsa:3761	4	1561	0.0114016382852636	0.695	75.219729944408	0.033	0.109516715546648
1810	1810	hsa:3762	3	1325	0.00379576399889981	0.554	133.680677760895	0.002	0.00864816014924801
1811	1811	hsa:3778	2	153	-0.0544307337373197	0.204	8.12045430149112	0.611	0.384189404095196
1812	1812	hsa:3779	4	2407	-0.0101408201054516	0.3	443.905233216682	0.008	0.0168774876999078
1813	1813	hsa:27345	6	3380	-0.00129502448000541	0.455	346.796830345775	0.25	0.361014315155935
1814	1814	hsa:3784	2	220	-0.0858734289698786	0.048	21.5483553116672	0.377	0.0906983166514732
1815	1815	hsa:3791	4	2751	-0.0130285187939595	0.245	218.798009704618	0.018	0.0283293133997981
1816	1816	hsa:2531	2	61	-0.0786342019518654	0.252	5.03259490921126	0.108	0.125301109822432
1817	1817	hsa:3795	12	3630	-0.0083445764813477	0.274	402.121327103485	0.475	0.395534654327534
1818	1818	hsa:57498	18	3702	-0.00761916069431855	0.342	318.439718717901	0.502	0.474208325102527
1819	1819	hsa:9493	2	2	NA	1	0.888311519582086	0.016	0.0821626649078777
1820	1820	hsa:3799	3	613	-0.013754531012581	0.327	67.1683665629217	0.355	0.366066223091421
1821	1821	hsa:3800	5	2833	-0.00327350239851192	0.393	347.928675914817	0.02	0.0459493137661724
1822	1822	hsa:3804	3	647	-0.075320062222715	0.048	121.729354944042	0.000999000999000999	0.000524849984290404
1823	1823	hsa:3811	3	647	-0.0771340634623142	0.047	67.1647141797575	0.000999000999000999	0.000514904131328276
1824	1824	hsa:3815	9	3582	-0.021040735665517	0.146	348.330911727353	0.465	0.25050503876709
1825	1825	hsa:4254	3	1143	-0.0126157422485519	0.285	200.865302362746	0.051	0.0760354301531578
1826	1826	hsa:9365	4	2150	0.0207119029800259	0.861	204.890144863598	0.147	0.388178896437135
1827	1827	hsa:10365	4	2044	-0.0558432701015792	0.004	249.20967915435	0.269	0.00842992718335298
1828	1828	hsa:3816	5	2336	-0.0150180287511564	0.187	258.532632247061	0.045	0.0486196774830208
1829	1829	hsa:3817	4	887	-0.0075273452840498	0.335	57.2297679700818	0.018	0.0368493798575056
1830	1830	hsa:354	3	283	-0.0975040365502089	0.024	32.4767536525819	0.034	0.00661865450164813
1831	1831	hsa:3818	5	2010	-0.0241494892064113	0.129	129.471027971686	0.422	0.212890296800326
1832	1832	hsa:3821	3	647	-0.0748714382602334	0.05	69.0234944058728	0.000999000999000999	0.000544679672970491
1833	1833	hsa:3822	3	111	-0.180293375063225	0.073	25.3045727168373	0.000999000999000999	0.000767634060990884
1834	1834	hsa:3823	3	111	-0.180867557786356	0.068	23.7172925337131	0.000999000999000999	0.000719876283728516
1835	1835	hsa:3824	3	659	-0.0814833976197165	0.035	136.84842142856	0.000999000999000999	0.000393746922965313
1836	1836	hsa:8564	7	3302	-0.0253172416392188	0.062	392.950866336302	0.206	0.0684643060527433
1837	1837	hsa:3845	1	93	NA	1	8.04342626262793	0.071	0.258800353537798
1838	1838	hsa:889	2	121	-0.154696945802249	0.018	11.909127305148	0.22	0.0258647845647144
1839	1839	hsa:8844	4	2115	-0.0457046479904544	0.007	218.171606145203	0.688	0.0305132685258186
1840	1840	hsa:8942	12	3635	-0.0235392115201068	0.07	370.548078867074	0.404	0.129115180385332
1841	1841	hsa:3897	7	3011	-0.0100410181189975	0.266	207.787165588924	0.188	0.199810578895922
1842	1842	hsa:284217	2	174	0.0153586139399358	0.578	28.6024334931086	0.000999000999000999	0.00488322589171153
1843	1843	hsa:3908	4	2182	-0.00750916103782278	0.336	322.490095107204	0.000999000999000999	0.00302077725258769
1844	1844	hsa:3909	5	3017	-0.0163093340958676	0.195	236.373894496963	0.661	0.392969554080048
1845	1845	hsa:3910	2	174	0.0180296772338376	0.595	40.2325041309647	0.000999000999000999	0.00500961982855872
1846	1846	hsa:3911	4	2182	-0.00803214775667016	0.32	317.625941793611	0.17	0.212779677206541
1847	1847	hsa:3912	2	174	0.0118862316578633	0.572	20.7411172146513	0.001	0.00484276453608632
1848	1848	hsa:3913	2	174	0.0166941455868867	0.587	34.365860080803	0.000999000999000999	0.00495020163334811
1849	1849	hsa:3914	1	25	NA	1	5.90154868710424	0.001	0.00790775527898214
1850	1850	hsa:3918	2	174	0.0161599329281063	0.586	22.1320137819575	0.001	0.00494712379027494
1851	1851	hsa:10319	2	174	0.0180296772338376	0.594	29.6518968466267	0.000999000999000999	0.00500219846046675
1852	1852	hsa:3920	4	234	-0.0230234815857352	0.339	37.8120101784667	0.21	0.259302663865286
1853	1853	hsa:8649	2	200	-0.0820297433685433	0.069	29.4109805478677	0.367	0.118411416765127
1854	1854	hsa:10542	3	336	-0.0702367060700454	0.053	43.4806478194546	0.257	0.0721387578031802
1855	1855	hsa:51056	8	3322	-0.00536185882299136	0.367	516.342018835936	0.115	0.175792965824168
1856	1856	hsa:27040	2	344	-0.0562606753571432	0.089	67.9027312478585	0.000999000999000999	0.000918262495786519
1857	1857	hsa:9113	4	1728	-0.0403148867246027	0.012	153.595698606836	0.043	0.00442181235692108
1858	1858	hsa:26524	4	1728	-0.0398756003355394	0.014	275.972331992086	0.004	0.000604248896564832
1859	1859	hsa:3931	2	91	0.0263952181568925	0.621	12.5953275762216	0.022	0.0723148380037514
1860	1860	hsa:3932	4	2472	-0.0219046788336354	0.2	289.502258684746	0.000999000999000999	0.00190173680154832
1861	1861	hsa:253558	2	115	0.00166810912354148	0.5	13.2115946541193	0.121	0.230209270793693
1862	1862	hsa:3937	2	390	-0.0541933168454099	0.116	77.4457435051409	0.000999000999000999	0.00116613257202214
1863	1863	hsa:3939	2	244	-0.0277674505994397	0.297	31.2301047887171	0.000999000999000999	0.00270675828380611
1864	1864	hsa:3948	2	142	0.0192806570281985	0.585	7.78676011398555	0.021	0.0663313375139155
1865	1865	hsa:197257	5	2918	-0.012887798276683	0.238	284.726825008312	0.042	0.0560332803790303
1866	1866	hsa:51176	3	1419	-0.0281436693359334	0.121	223.691276415391	0.002	0.00225703062529744
1867	1867	hsa:10637	7	3452	-0.0272503587438518	0.038	197.758910559884	0.291	0.0608698793073322
1868	1868	hsa:7044	5	2594	-0.0203364089731183	0.103	189.127994727891	0.016	0.0122087018126715
1869	1869	hsa:3952	4	1861	-0.03151790825753	0.106	150.548609320805	0.000999000999000999	0.00107515037183181
1870	1870	hsa:3953	3	1401	-0.000760308704374779	0.486	117.272850412788	0.004	0.0140804067218029
1871	1871	hsa:3955	1	4	NA	1	0.443272389091587	0.05	0.1997866136777
1872	1872	hsa:5641	3	67	-0.206071574855903	0.023	6.1596895329629	0.977	0.107760347663818
1873	1873	hsa:3972	5	2612	-0.00782140391819945	0.334	174.471394336273	0.311	0.339104635233813
1874	1874	hsa:64077	2	45	-0.0719146519960791	0.291	5.22357943796187	0.505	0.428760149344293
1875	1875	hsa:3976	2	113	-0.108276017354824	0.086	13.5926020895589	0.000999000999000999	0.000890255741793977
1876	1876	hsa:3977	3	1140	-0.00932330028910553	0.386	159.702333260021	0.002	0.0063045580781293
1877	1877	hsa:11027	4	1570	-0.0115510986093697	0.317	297.921048108466	0.000999000999000999	0.00286839343272844
1878	1878	hsa:11026	5	2672	-0.0277148543793402	0.103	315.424931378707	0.002	0.00195445268416999
1879	1879	hsa:23547	6	3152	-0.0262637062266476	0.116	204.61592404968	0.4	0.188869150036397
1880	1880	hsa:353514	4	1570	-0.0110137224948696	0.329	150.252211934078	0.000999000999000999	0.00296476404513289
1881	1881	hsa:10859	5	2672	-0.0278897115047619	0.105	351.437025102741	1	0.341648467526584
1882	1882	hsa:10288	5	2672	-0.0280215594178823	0.102	552.955380333819	0.001	0.00103943484995736
1883	1883	hsa:11006	4	1570	-0.0104663949708417	0.337	330.576160294113	0.000999000999000999	0.00302876717494252
1884	1884	hsa:10990	5	2672	-0.0279461170290915	0.105	296.904604232344	0.002	0.00198836463572183
1885	1885	hsa:3984	7	3443	-0.0167133666160983	0.144	442.573442685181	0.203	0.132493785077856
1886	1886	hsa:3985	4	1832	-0.0261446316362287	0.115	177.85266262334	0.144	0.0844686705532144
1887	1887	hsa:3988	4	117	-0.0592448399759479	0.228	14.5170282830712	0.771	0.48139131672883
1888	1888	hsa:3990	2	104	-0.121605508769282	0.071	8.9341489902338	0.186	0.0703494713992121
1889	1889	hsa:3991	2	144	-0.108036666018048	0.049	14.8376632123647	0.979	0.193666536031608
1890	1890	hsa:8513	2	104	-0.104233293230813	0.099	6.12223518016309	0.969	0.320805360509516
1891	1891	hsa:9388	2	104	-0.104876708621127	0.105	15.9939677524972	0.573	0.229268629106551
1892	1892	hsa:3996	2	83	-0.111862230136028	0.127	7.92631827861804	0.048	0.0371863465198041
1893	1893	hsa:3993	4	2090	-0.0429023416730197	0.007	302.593483242	0.000999000999000999	9.00041951695248e-05
1894	1894	hsa:4008	6	3139	-0.0168513216088759	0.175	220.353130079683	0.759	0.400961856792639
1895	1895	hsa:1902	2	325	-0.0326998393217589	0.216	30.8941390797039	0.804	0.477685908663549
1896	1896	hsa:9170	2	267	-0.0261780188803407	0.298	41.2501955373762	0.005	0.0111883789469469
1897	1897	hsa:23566	2	267	-0.0261780188803407	0.293	28.9928784665238	0.003	0.00706428185538532
1898	1898	hsa:2846	2	267	-0.0265052441163449	0.291	19.5966515308844	0.345	0.331167251311278
1899	1899	hsa:57121	2	267	-0.0265052441163449	0.296	22.09367270544	0.07	0.101044309452163
1900	1900	hsa:10161	2	176	0.0397409134272208	0.726	21.0877253426865	0.135	0.32565643179835
1901	1901	hsa:79888	1	34	NA	1	5.17842756970098	0.138	0.411309219947841
1902	1902	hsa:54947	1	34	NA	1	3.53303933056878	0.245	0.589591781767166
1903	1903	hsa:10162	3	562	0.00978582071415792	0.59	57.9076827227072	0.006	0.023518445073501
1904	1904	hsa:254531	4	2122	0.0160121098229512	0.802	345.380643221	0.078	0.235942035027921
1905	1905	hsa:23175	3	523	-0.00565940033275922	0.442	91.5652803165212	0.216	0.319728306789821
1906	1906	hsa:9663	5	2933	-0.00302722117224715	0.437	304.948464091661	0.246	0.347257886887308
1907	1907	hsa:64900	6	3293	-0.00189809372701647	0.468	345.043084224702	0.194	0.30861872307806
1908	1908	hsa:4023	5	2977	-0.00120109868023454	0.465	301.311725151795	0.119	0.21549383839545
1909	1909	hsa:9227	2	84	-0.131643899386544	0.097	4.77956239290196	0.916	0.303943430200233
1910	1910	hsa:4035	6	2977	-0.00165577873446872	0.455	360.920886142005	0.139	0.237847951076047
1911	1911	hsa:4041	6	3154	-0.0154731401346798	0.166	443.128667388052	0.415	0.253187576339584
1912	1912	hsa:55341	3	22	-0.135352673857395	0.232	3.55199397088762	0.002	0.00402549046666245
1913	1913	hsa:4046	4	2115	-0.0459691075633947	0.006	185.919287204511	0.732	0.0282316467644114
1914	1914	hsa:4047	1	3	NA	1	0.736973394667223	0.002	0.0144292161968444
1915	1915	hsa:4049	4	1556	-0.0309192184100482	0.093	301.185126918471	0.000999000999000999	0.000955448234324078
1916	1916	hsa:4048	2	41	-0.0654539136379988	0.312	3.48122946379752	0.883	0.630660530982576
1917	1917	hsa:4050	4	1164	-0.0266773082068284	0.13	221.253754470333	0.001	0.00129323689397613
1918	1918	hsa:4052	5	2772	-0.00552870106854135	0.356	226.224062502209	0.000999000999000999	0.00318002221835219
1919	1919	hsa:4055	3	1164	-0.022865673113279	0.15	112.735134466711	0.052	0.0456583260532354
1920	1920	hsa:4060	2	51	-0.0233380014004668	0.45	11.020533014024	0.009	0.0263616055113479
1921	1921	hsa:23643	4	1864	-0.0236481223202785	0.142	400.823470617425	0.000999000999000999	0.00139881816793092
1922	1922	hsa:4067	2	496	-0.00822635348738865	0.413	93.7573106818922	0.028	0.0631378031716314
1923	1923	hsa:10434	3	721	-0.00989441145192546	0.384	102.637601708722	0.876	0.702875011987037
1924	1924	hsa:11313	4	1752	0.0288173833723013	0.912	220.261722963414	0.14	0.390474569589432
1925	1925	hsa:8379	8	3494	-0.0363287489939989	0.004	459.070093238979	0.39	0.0116423883540443
1926	1926	hsa:4085	3	123	-0.0501340452357461	0.277	30.4010081973109	0.000999000999000999	0.0025437766602742
1927	1927	hsa:10459	8	3509	-0.0372170791040389	0.002	642.150327458565	0.348	0.00575603198475039
1928	1928	hsa:4094	5	2422	-0.0332993438817721	0.053	342.217989257325	0.001	0.000574796588153844
1929	1929	hsa:389692	6	3312	-0.0159770256957681	0.185	440.247082039016	0.266	0.19741371105017
1930	1930	hsa:9500	6	3143	-0.0267973019137233	0.084	272.827235375207	0.137	0.062887915285534
1931	1931	hsa:9223	4	2302	0.00461208243293217	0.557	321.23754073369	0.004	0.0158336183320113
1932	1932	hsa:9863	2	272	-0.0891454867995623	0.033	17.6462949382487	0.357	0.0641035690565946
1933	1933	hsa:260425	9	3569	-0.0196623495837072	0.12	330.695927744323	0.338	0.170553701623
1934	1934	hsa:4116	5	93	-0.0122008198811442	0.412	12.9725248834186	0.000999000999000999	0.00362012040368283
1935	1935	hsa:10892	4	2254	-0.0487965150433131	0.006	184.43909787758	0.923	0.0343141228287444
1936	1936	hsa:9794	13	3634	-0.0173763896749239	0.156	393.803289612762	0.513	0.282129007047273
1937	1937	hsa:84441	13	3634	-0.0176935056937389	0.151	323.551054719183	0.64	0.32246473232905
1938	1938	hsa:55534	13	3634	-0.0168679586073953	0.166	509.644466696388	0.412	0.251853500350299
1939	1939	hsa:4121	17	3670	-0.0166047124695626	0.116	321.174929209806	0.558	0.241924874588961
1940	1940	hsa:10905	4	23	-0.0733636275579174	0.339	3.07768314871058	0.127	0.178468606795684
1941	1941	hsa:11253	5	34	0.014073344364025	0.548	6.72069377967392	0.001	0.00466306092851691
1942	1942	hsa:57134	1	2	NA	1	0.505411120441342	0.015	0.0779955761681989
1943	1943	hsa:4124	15	3670	-0.0141004096527331	0.147	322.487519835324	0.582	0.295897708061592
1944	1944	hsa:4122	15	3670	-0.0148244750093276	0.14	471.707887507811	0.555	0.276215731678983
1945	1945	hsa:4128	3	544	0.0762971382462854	0.992	92.3407689113838	0.004	0.0259090285793721
1946	1946	hsa:4129	6	3311	0.00245163718930618	0.573	436.779000265843	0.011	0.0382385964699477
1947	1947	hsa:5604	2	562	-0.0554532596219142	0.055	76.3828404777591	0.085	0.029758834593429
1948	1948	hsa:5605	9	3613	-0.017300957621113	0.144	442.316362699314	0.717	0.337685120143843
1949	1949	hsa:5606	2	346	-0.111880876809349	0.008	33.8042483293449	0.002	0.000192686749371592
1950	1950	hsa:6416	2	470	-0.10559083791617	0.002	51.6706473685548	0.941	0.0136923408875753
1951	1951	hsa:5607	3	491	-0.00887869168300203	0.398	81.0253444181765	0.084	0.147042018314263
1952	1952	hsa:5608	3	1459	-0.0638735194388356	0.003	147.596448691319	0.978	0.0200432941502328
1953	1953	hsa:5609	3	1350	-0.0471950249159119	0.016	183.815205664996	0.03	0.00414802773794992
1954	1954	hsa:4214	3	1908	-0.0378641198079067	0.025	213.366919209481	0.526	0.0701070357927125
1955	1955	hsa:4296	3	1288	-0.0566979622407378	0.004	155.609558395651	0.622	0.0174067349470138
1956	1956	hsa:7786	3	278	-0.132935336554295	0.004	21.9927589061569	0.486	0.0140804067218029
1957	1957	hsa:9175	4	1350	-0.0490880747722526	0.011	110.050398682396	0.158	0.0127830251982175
1958	1958	hsa:9020	4	2453	-0.0440755298003192	0.016	302.542884659034	0.933	0.0776930243254461
1959	1959	hsa:10746	3	1462	-0.0231883472980418	0.138	125.218346305366	0.989	0.408294438745924
1960	1960	hsa:4215	3	1577	-0.0452603229296965	0.012	219.656518453237	0.243	0.019938273827461
1961	1961	hsa:4216	3	1379	-0.0185240513401016	0.191	159.890437237285	0.767	0.427881160881646
1962	1962	hsa:4217	3	1529	-0.0564297170366876	0.003	273.375375690626	0.718	0.0153804834203341
1963	1963	hsa:9064	3	346	-0.145671677191591	0.000999000999000999	39.0079864824362	0.282	0.00258465338904626
1964	1964	hsa:6885	2	441	-0.0758892287892412	0.041	60.6196979245159	0.000999000999000999	0.000454765691963352
1965	1965	hsa:1326	3	1334	-0.0445988542957937	0.046	138.489896298956	0.000999000999000999	0.000504937021421759
1966	1966	hsa:11184	4	1288	-0.0571827160551615	0.002	230.138376181999	0.001	2.82447267548086e-05
1967	1967	hsa:5871	4	1772	-0.0485062902219348	0.023	191.32175141617	0.994	0.109241017593024
1968	1968	hsa:8491	3	533	-0.0307080094023902	0.21	103.069707612977	0.005	0.00825191337055335
1969	1969	hsa:9448	4	1908	-0.0380481361261829	0.023	177.165785314505	0.281	0.039047259390669
1970	1970	hsa:5594	9	3617	-0.0172671597768256	0.17	352.869526412379	0.543	0.312248064558471
1971	1971	hsa:5602	2	965	-0.0261440437255242	0.175	78.666922493192	0.28	0.196780814062704
1972	1972	hsa:5600	2	951	-0.00384874079627685	0.463	123.56685496259	0.005	0.0163632200441927
1973	1973	hsa:6300	2	951	-0.00581361766980521	0.44	150.931250339152	0.006	0.0183136175952151
1974	1974	hsa:5603	5	3386	-0.0185642241122203	0.143	460.484826153418	0.285	0.171178203341743
1975	1975	hsa:1432	1	126	NA	1	15.5075132770234	0.027	0.124521797150401
1976	1976	hsa:5595	9	3617	-0.0173952888113421	0.17	406.494959963154	0.631	0.34674021933565
1977	1977	hsa:5598	3	1797	0.00757846987701847	0.626	124.124281123479	0.142	0.304040252526439
1978	1978	hsa:5599	2	965	-0.0331966905579281	0.124	74.3352904457838	0.311	0.164106636996062
1979	1979	hsa:9479	4	2313	-0.0278837788307762	0.045	152.101927721164	0.004	0.00173205966727333
1980	1980	hsa:23542	3	977	-0.051498019954325	0.032	74.9719399606583	1	0.142144620037837
1981	1981	hsa:23162	4	2360	-0.0254595571128648	0.062	327.85220595437	0.987	0.232152053132524
1982	1982	hsa:5601	1	121	NA	1	12.6391877373661	0.088	0.301876824876346
1983	1983	hsa:9261	5	3148	-0.0202584667981095	0.105	411.969237160405	0.085	0.0510411731404992
1984	1984	hsa:7867	10	3617	-0.0192287028120739	0.137	284.229266442618	0.482	0.245487042101261
1985	1985	hsa:8550	10	3617	-0.0213372641472478	0.128	366.416013764695	0.562	0.261270001358444
1986	1986	hsa:4137	1	5	NA	1	0.908353227865305	0.022	0.105967682163724
1987	1987	hsa:10299	2	6	0.365148371670111	0.868	1.29650828918431	0.038	0.145516590835122
1988	1988	hsa:4082	3	793	-0.0297579489440759	0.152	89.2112365962887	0.497	0.270677174592598
1989	1989	hsa:65108	6	3264	-0.0128483023240771	0.212	326.53216080525	0.505	0.346271208331049
1990	1990	hsa:4141	2	35	-0.225943400364045	0.051	5.30099954772738	0.154	0.0459202356634779
1991	1991	hsa:92935	3	129	0.00113487815039099	0.496	23.3255322199147	0.025	0.0668367291990022
1992	1992	hsa:5648	3	29	-0.141827157232794	0.177	2.40930120312419	0.063	0.0612884172299369
1993	1993	hsa:4144	2	57	-0.101718331181469	0.191	6.44281296703054	0.342	0.243548268834077
1994	1994	hsa:27430	2	57	-0.101718331181469	0.19	7.19047837198112	0.537	0.334912290563821
1995	1995	hsa:4145	5	2725	-0.0116819166990859	0.24	248.54594421711	0.000999000999000999	0.0022383707016876
1996	1996	hsa:57506	4	2427	-0.0438800913181054	0.013	213.060235337189	0.492	0.0387091195677307
1997	1997	hsa:4149	5	3075	-0.0228771376831624	0.066	223.261858799906	0.125	0.0478297221487432
1998	1998	hsa:154141	5	3093	-0.0007179981700522	0.474	200.748563960347	0.388	0.495329802767945
1999	1999	hsa:129642	3	685	-0.00786195192077044	0.443	57.2633602900548	0.135	0.228255710696994
[truncated: 1,715 more rows]
